# Supplementary material for: Deep whole genome sequencing identifies recurrent genomic alterations in commonly-used breast cancer cell lines and patient derived xenograft models
Source: Research Square preprint supplement (doi:10.21203/rs.3.rs-859624/v1), 2021-09-02
Supplement: Supplementary file 1 [file 8a144ae6c435abf4bbf12638.xlsx]

## Sheet: 5A
Table S5A: List of copy number alterations identified in the cell line models
SAMPLE	RatioToAverageCoverage	LOCATION	SVTYPE	SVLEN	NumofGenes	GENES	CandidateGene
T47D	5.56	17:59477701-59863900	DUP	386200	7	BRIP1,C17orf82,NACA2,RP11-15K2.2,RP11-332H18.4,TBX2,TBX4	BRIP1
T47D	5.24	17:59840408-59931854	DUP	91446	1	BRIP1	BRIP1
T47D	3.58	17:57149048-57182668	DUP	33620	1	TRIM37	TRIM37
T47D	3.5	17:59864901-60092900	DUP	228000	5	BRIP1,INTS2,MED13,RN7SL800P,Y_RNA	BRIP1,MED13
T47D	3.49	20:45616901-47487600	DUP	1870700	27	AL021394.1,AL031666.1,AL031666.2,AL035106.1,CTD-2653D5.1,EYA2,LINC00494,MIR3616,NCOA3,RN7SL243P,RNA5SP486,RNU6-497P,RNU6-563P,RNU7-144P,RNU7-173P,RNU7-92P,RP1-148H17.1,RP1-66N13.1,RP11-347D21.1,RP11-347D21.2,RP11-347D21.3,RP11-347D21.4,RP4-569M23.2,RP4-569M23.4,SNORD36,SULF2,ZMYND8	NCOA3
T47D	3.21	20:52181786-55855043	DUP	3673257	42	AC005220.3,AC005808.3,AC006076.1,AL117380.1,AL117380.2,AL121914.1,AL133232.1,AURKA,BCAS1,BMP7,CASS4,CBLN4,CYP24A1,DOK5,FAM209A,FAM209B,FAM210B,GCNT7,MC3R,MIR4756,PFDN4,RN7SL170P,RNA5SP487,RNU4ATAC7P,RNU6-1146P,RNU6-929P,RNU7-14P,RP11-380D15.3,RP11-560A15.3,RP11-560A15.4,RP4-724E16.2,RP4-813D12.2,RP4-813D12.3,RP5-1010E17.1,RP5-1010E17.2,RP5-843L14.1,RP5-897D18.1,RTFDC1,TFAP2C,U3,ZNF217,snoU13	AURKA,ZNF217
T47D	2.89	20:51246801-52484900	DUP	1238100	18	AC005808.3,AC006076.1,AL050316.1,AL354993.1,RN7SKP184,RNU7-14P,RP11-15M15.1,RP11-15M15.2,RP11-80K6.2,RP4-669H2.1,RP4-678D15.1,RP4-715N11.2,RP4-723E3.1,RP4-724E16.2,RP5-823G15.5,TSHZ2,Y_RNA,ZNF217	TSHZ2,ZNF217
T47D	2.88	17:58427101-59123000	DUP	695900	14	AC079005.1,APPBP2,BCAS3,C17orf64,PPM1D,RN7SL448P,RN7SL606P,RNU6-623P,RP11-15E18.1,RP11-15E18.4,RP11-264B14.1,USP32,Y_RNA,snoU13	PPM1D
T47D	2.71	17:57647801-58189800	DUP	542000	20	AC005702.1,AC005702.2,AC005702.3,AC005702.4,CLTC,CTD-2319I12.1,CTD-2319I12.2,DHX40,HEATR6,MIR21,MIR4737,PTRH2,RNFT1,RNU6-450P,RP11-178C3.1,RP11-178C3.2,RP11-619I22.1,TBC1D3P1-DHX40P1,TUBD1,VMP1	CLTC
T47D	2.44	8:144410749-144514112	DUP	103363	7	MAFA,RHPN1,RHPN1-AS1,RNU6-220P,RP11-909N17.2,RP11-909N17.3,TOP1MT	MAFA
T47D	2.39	3:197187201-197362800	DUP	175600	3	AC128709.2,BDH1,RP13-616I3.1	BDH1
T47D	2.33	3:195585001-195678400	DUP	93400	8	AC124944.3,AC124944.5,RN7SL773P,RNU2-11P,RP11-352G9.1,RP11-480A16.1,TNK2,TNK2-AS1	TNK2
T47D	2.28	17:56579801-57647000	DUP	1067200	33	AC099850.1,AC100832.1,C17orf47,CTD-2510F5.4,CTD-2510F5.6,DHX40,MIR301A,MIR454,MIR4729,MTMR4,PPM1E,PRR11,RAD51C,RN7SL716P,RNU1-108P,RNU1-52P,RNU1-60P,RNU1-85P,RNU2-58P,RNU4-13P,RNU6-518P,RP11-112H10.4,RP11-567L7.5,RP11-567L7.6,RP11-579O24.3,SEPT4,SKA2,SMG8,TEX14,TRIM37,U3,YPEL2,Y_RNA	RAD51C,TRIM37
T47D	2.28	3:195709801-197186300	DUP	1476500	44	AC069257.8,AC127904.2,AC128709.2,AC128709.3,AC128709.4,CEP19,CTD-2002J20.1,DLG1,DLG1-AS1,FBXO45,LINC00885,LINC01063,MFI2-AS1,MIR4797,NCBP2,NCBP2-AS1,NCBP2-AS2,NRROS,PAK2,PCYT1A,PIGX,PIGZ,RN7SL434P,RN7SL738P,RNF168,RNU6-1279P,RNU6-42P,RNU6-646P,RNU6-910P,RNU7-18P,SENP5,SLC51A,SMCO1,TCTEX1D2,TFRC,TM4SF19,TM4SF19-AS1,U4,UBXN7,UBXN7-AS1,WDR53,Y_RNA,ZDHHC19,snoU13	PAK2,TFRC
T47D	2.27	20:54857001-55766700	DUP	909700	23	AL117380.1,AL117380.2,AL121914.1,AL133232.1,AURKA,BMP7,CASS4,FAM209A,FAM209B,FAM210B,GCNT7,RN7SL170P,RNU6-1146P,RNU6-929P,RP11-380D15.3,RP11-560A15.3,RP11-560A15.4,RP5-843L14.1,RP5-897D18.1,RTFDC1,TFAP2C,U3,snoU13	AURKA
T47D	2.24	20:42224059-47966521	DUP	5742462	100	ACOT8,ADA,AL031663.1,AL031663.2,AL132772.1,C20orf62,CD40,CDH22,DBNDD2,DNTTIP1,ELMO2,EPPIN,EPPIN-WFDC6,FITM2,GDAP1L1,GTSF1L,HNF4A,HNF4A-AS1,IFT52,JPH2,KCNK15,KCNS1,MATN4,MIR3617,MIR3646,MMP9,MYBL2,NCOA5,NEURL2,OCSTAMP,OSER1,OSER1-AS1,PABPC1L,PCIF1,PI3,PIGT,PKIG,PLTP,R3HDML,RBPJL,RIMS4,RN7SL31P,RN7SL443P,RNA5SP485,RNU6-639P,RNU6ATAC38P,RP1-28H20.3,RP11-445H22.3,RP11-445H22.4,RP11-465L10.10,RP3-337O…	ADA,YWHAB
T47D	2.18	20:42196776-48632473	DUP	6435697	100	ACOT8,ADA,AL031663.1,AL031663.2,AL132772.1,C20orf62,CD40,CDH22,DBNDD2,DNTTIP1,ELMO2,EPPIN,EPPIN-WFDC6,FITM2,GDAP1L1,GTSF1L,HNF4A,HNF4A-AS1,IFT52,JPH2,KCNK15,KCNS1,MATN4,MIR3617,MIR3646,MMP9,MYBL2,NCOA5,NEURL2,OCSTAMP,OSER1,OSER1-AS1,PABPC1L,PCIF1,PI3,PIGT,PKIG,PLTP,R3HDML,RBPJL,RIMS4,RN7SL31P,RN7SL443P,RNA5SP485,RNU6-639P,RNU6ATAC38P,RP11-445H22.3,RP11-445H22.4,RP11-465L10.10,RP3-337O18.9,RP3-461…	ADA,YWHAB
T47D	2.16	20:46569775-49844594	DUP	3274819	63	ADNP,AL034553.1,AL035106.1,AL035457.1,AL118525.1,AL133228.1,ARFGEF2,B4GALT5,BCAS4,CEBPB,CSE1L,DDX27,DPM1,FAM65C,KCNB1,KCNG1,LINC00494,MIR1302-5,MIR645,MOCS3,PARD6B,PTGIS,PTPN1,RN7SL197P,RN7SL636P,RN7SL672P,RNF114,RNU6-147P,RNU6-919P,RNU7-144P,RNU7-72P,RP1-155G6.4,RP1-66N13.1,RP11-112L6.2,RP11-112L6.3,RP11-112L6.4,RP11-290F20.1,RP11-290F20.2,RP11-290F20.3,RP11-347D21.1,RP11-347D21.2,RP11-347D21.3,…	ADNP
T47D	2.15	8:128329901-129375200	DUP	1045300	13	CASC11,CASC8,MIR1205,MIR1207,MIR1208,MYC,POU5F1B,PVT1,RN7SKP226,RNU1-106P,RNU4-25P,RP11-382A18.2,TMEM75	MYC
T47D	2.14	20:48773101-49844900	DUP	1071800	27	ADNP,AL034553.1,AL035457.1,AL133228.1,BCAS4,CEBPB,DPM1,FAM65C,KCNG1,MIR1302-5,MIR645,MOCS3,PARD6B,PTPN1,RN7SL636P,RN7SL672P,RP11-112L6.2,RP11-112L6.3,RP11-112L6.4,RP11-290F20.1,RP11-290F20.2,RP11-290F20.3,RP4-530I15.6,RP4-530I15.9,RP5-914P20.5,RP5-955M13.4,Y_RNA	ADNP
T47D	2.13	8:123604401-124001800	DUP	397400	9	AC016405.2,LINC01151,RP11-44N11.1,RP11-44N11.2,RP11-44N11.3,RP11-557C18.4,RP11-973F15.2,ZHX2,snoU13	ZHX2
T47D	2.1	20:46555489-50657917	DUP	4102428	72	ADNP,AL034553.1,AL035106.1,AL035457.1,AL079339.1,AL118525.1,AL133228.1,ARFGEF2,ATP9A,B4GALT5,BCAS4,CEBPB,CSE1L,DDX27,DPM1,FAM65C,KCNB1,KCNG1,LINC00494,MIR1302-5,MIR3194,MIR645,MOCS3,NFATC2,PARD6B,PTGIS,PTPN1,RN7SL197P,RN7SL603P,RN7SL636P,RN7SL672P,RNF114,RNU6-147P,RNU6-347P,RNU6-919P,RNU7-144P,RNU7-6P,RNU7-72P,RP1-155G6.4,RP1-66N13.1,RP11-112L6.2,RP11-112L6.3,RP11-112L6.4,RP11-290F20.1,RP11-290F2…	ADNP
T47D	2.1	20:40869943-47925480	DUP	7055537	99	ACOT8,ADA,AL031663.1,AL031663.2,AL132772.1,C20orf62,DBNDD2,DNTTIP1,EPPIN,EPPIN-WFDC6,FITM2,GDAP1L1,GTSF1L,HNF4A,HNF4A-AS1,IFT52,JPH2,KCNK15,KCNS1,L3MBTL1,MATN4,MIR3617,MIR3646,MMP9,MYBL2,NEURL2,OSER1,OSER1-AS1,PABPC1L,PCIF1,PI3,PIGT,PKIG,PLTP,PTPRT,R3HDML,RBPJL,RIMS4,RN7SKP100,RN7SL31P,RN7SL443P,RN7SL666P,RNA5SP485,RNU6-1251P,RNU6-639P,RNU6-743P,RNU6ATAC38P,RP1-138B7.5,RP1-232N11.2,RP1-269M15.3,R…	ADA,YWHAB
T47D	2.07	8:124082901-124868000	DUP	785100	22	ANXA13,C8orf76,CTD-2552K11.2,FAM83A,FAM83A-AS1,FAM91A1,FBXO32,FER1L6,KLHL38,MIR4663,MIR548D1,RN7SKP155,RNU6-628P,RNU6-875P,RP11-174I12.2,RP11-539E17.5,TBC1D31,U3,WDYHV1,ZHX1,ZHX1-C8ORF76,snoU13	FAM83A
T47D	2.06	11:133329001-134697100	DUP	1368100	23	ACAD8,AP000911.1,AP004550.1,AP005638.1,GLB1L2,GLB1L3,IGSF9B,JAM3,MIR4697,NCAPD3,OPCML,RP11-448P19.1,RP11-469N6.1,RP11-469N6.2,RP11-469N6.3,RP11-627G23.1,RP11-700F16.3,RP11-713P17.3,RP11-713P17.4,RP11-713P17.5,SPATA19,THYN1,VPS26B	NCAPD3
T47D	2.05	20:39729439-39782017	DUP	52578	3	PLCG1,RP1-1J6.2,TOP1	PLCG1,TOP1
T47D	2.05	11:125412501-127245300	DUP	1832800	49	ACRV1,CDON,CHEK1,CTD-2234N14.1,CTD-2234N14.2,DCPS,DDX25,EI24,FAM118B,FOXRED1,HYLS1,KIRREL3,KIRREL3-AS1,KIRREL3-AS2,KIRREL3-AS3,MIR3167,PATE1,PATE2,PATE3,PATE4,PUS3,RN7SL351P,RNU2-35P,RNU4-86P,RNU6-1156P,RP11-115C10.1,RP11-168K9.1,RP11-168K9.2,RP11-480C22.1,RP11-50B3.2,RP11-50B3.4,RP11-673E11.2,RP11-680F20.10,RP11-680F20.11,RP11-680F20.12,RP11-680F20.4,RP11-680F20.5,RP11-680F20.6,RP11-680F20.9,RP1…	CDON,CHEK1,FAM118B
T47D	2.04	14:38032068-38066862	DUP	34794	4	FOXA1,RP11-356O9.1,RP11-356O9.2,TTC6	FOXA1
T47D	2.04	11:120191501-121878900	DUP	1687400	12	AP000758.1,AP002348.1,ARHGEF12,GRIK4,RNU6-256P,RP11-640N11.2,RP11-730K11.1,SC5D,SORL1,TBCEL,TECTA,TMEM136	ARHGEF12
T47D	2.02	1:114686301-115043600	DUP	357300	3	RP4-543J13.1,TRIM33,Y_RNA	TRIM33
T47D	2	11:127744901-128737700	DUP	992800	9	ETS1,KCNJ1,RP11-1007G5.2,RP11-264E20.1,RP11-264E20.2,RP11-702B10.1,RP11-702B10.2,RP11-744N12.3,SENCR	ETS1
T47D	1.99	20:39643218-39706574	DUP	63356	2	RNU2-52P,TOP1	TOP1
T47D	1.98	8:144405901-144830300	DUP	424400	30	7SK,CCDC166,EEF1D,FAM83H,FAM83H-AS1,GSDMD,MAFA,MAPK15,MIR4664,MROH6,PYCRL,RHPN1,RHPN1-AS1,RNU6-220P,RNU7-109P,RP11-429J17.2,RP11-429J17.4,RP11-429J17.5,RP11-661A12.12,RP11-661A12.14,RP11-661A12.5,RP11-661A12.7,RP11-661A12.9,RP11-909N17.2,RP11-909N17.3,TIGD5,TOP1MT,TSTA3,ZC3H3,ZNF623	MAFA
T47D	1.96	1:215029539-215860858	DUP	831319	3	KCTD3,SNORD116,USH2A	USH2A
T47D	1.93	14:38061534-38184715	DUP	123181	2	FOXA1,TTC6	FOXA1
T47D	1.93	1:152244101-152555500	DUP	311400	9	CRCT1,CRNN,FLG,FLG-AS1,FLG2,LCE3D,LCE3E,LCE5A,RP1-91G5.3	FLG
T47D	1.93	1:151585238-152609803	DUP	1024565	43	AL450992.2,AL589765.1,AL589986.2,C2CD4D,CELF3,CRCT1,CRNN,FLG,FLG-AS1,FLG2,HRNR,LCE3A,LCE3B,LCE3C,LCE3D,LCE3E,LCE5A,LINGO4,MRPL9,NBPF18P,OAZ3,RIIAD1,RNU6-1062P,RNU6-662P,RORC,RP1-91G5.3,RP11-107M16.2,RP11-404E16.1,RP11-98D18.1,RP11-98D18.15,RP11-98D18.16,RP11-98D18.17,RP11-98D18.2,RP11-98D18.3,RP11-98D18.9,RPTN,S100A10,S100A11,TCHH,TCHHL1,THEM4,THEM5,Y_RNA	FLG
T47D	1.92	8:134226401-134552900	DUP	326500	3	NDRG1,ST3GAL1,WISP1-OT1	NDRG1
T47D	1.9	11:65171476-65285739	DUP	114263	5	AP000769.1,AP000769.7,FRMD8,MALAT1,NEAT1	MALAT1
T47D	1.9	11:65161924-65317334	DUP	155410	7	AP000769.1,AP000769.7,FRMD8,LTBP3,MALAT1,NEAT1,SCYL1	MALAT1
T47D	1.9	9:115836001-116215100	DUP	379100	15	ALAD,BSPRY,C9orf43,CDC26,FAM225A,FAM225B,FKBP15,HDHD3,POLE3,PRPF4,RGS3,RNF183,SLC31A1,SLC31A2,WDR31	SLC31A1
T47D	1.88	8:109883301-110395200	DUP	511900	5	NUDCD1,PKHD1L1,RP11-1084E5.1,RP11-122A21.2,TRHR	PKHD1L1
T47D	1.88	9:123855301-124588400	DUP	733100	15	AL161784.1,AL357936.1,CNTRL,DAB2IP,GSN,GSN-AS1,RAB14,RN7SL181P,RN7SL187P,RP11-162D16.2,RP11-244O19.1,RP11-477J21.6,RP11-524G24.2,STOM,TTLL11	CNTRL
T47D	1.88	8:108564201-109881900	DUP	1317700	6	EMC2,RNA5SP275,RP11-35G22.1,RP11-790J24.1,RSPO2,TMEM74	RSPO2
T47D	1.87	8:143495701-144403700	DUP	908000	32	AC087793.1,AC145123.2,AP006547.3,ARC,BAI1,C8orf31,CTD-2292P10.2,CTD-2292P10.4,CYP11B2,GLI4,GML,GPIHBP1,JRK,LY6D,LY6E,LY6H,LY6K,LYNX1,LYPD2,PSCA,RP11-273G15.2,RP11-520P18.5,RP11-706C16.5,RP11-706C16.7,RP11-706C16.8,RP13-582O9.5,RP13-582O9.7,SLURP1,THEM6,TOP1MT,ZFP41,ZNF696	BAI1
T47D	1.86	20:39517055-41229512	DUP	1712457	16	CHD6,EMILIN3,LPIN3,PLCG1,PTPRT,RN7SL615P,RNU2-52P,RNU6-1018P,RP1-1J6.2,RP3-511B24.6,RP5-1121H13.3,RP5-1121H13.4,SNORA26,TOP1,Y_RNA,ZHX3	CHD6,PLCG1,TOP1
T47D	1.85	8:110395801-111130000	DUP	734200	8	EBAG9,KCNV1,PKHD1L1,RNU2-67P,RP11-422N16.3,RP11-696P8.2,SNORD112,SYBU	PKHD1L1
T47D	1.85	8:141646301-142564700	DUP	918400	19	AC138647.1,CTD-3064M3.1,CTD-3064M3.3,CTD-3064M3.4,CTD-3064M3.7,DENND3,GPR20,MIR151A,PTK2,PTP4A3,RNA5SP278,RP11-10J21.3,RP11-10J21.4,RP11-10J21.5,RP11-10J21.6,RP11-128L5.1,RP11-809O17.1,SLC45A4,SNORD5	PTK2,PTP4A3
T47D	1.84	3:168852801-169487900	DUP	635100	7	ACTRT3,MECOM,RNU6-637P,RP11-3K16.2,RP11-641D5.2,RP11-816J6.3,TERC	MECOM,TERC
T47D	1.83	8:117824701-118109700	DUP	285000	6	AARD,MIR3610,RAD21,RAD21-AS1,RN7SL228P,SLC30A8	RAD21
T47D	1.83	1:215404201-216203300	DUP	799100	4	KCTD3,RP5-1111A8.3,SNORD116,USH2A	USH2A
T47D	1.83	3:183877401-185171500	DUP	1294100	30	ABCF3,AP2M1,C3orf70,CAMK2N2,CLCN2,DVL3,ECE2,EHHADH,EHHADH-AS1,EIF2B5-AS1,EIF2B5-IT1,EIF4G1,EPHB3,FAM131A,MAGEF1,MAP3K13,MIR1224,MIR5588,POLR2H,PSMD2,RP11-329B9.1,RP11-329B9.3,RP11-329B9.4,RP11-329B9.5,RP11-433C9.2,SNORD66,THPO,VPS8,VWA5B2,snoU13	EPHB3,MAP3K13,PSMD2
T47D	1.83	3:169489401-170936500	DUP	1447100	33	CLDN11,EIF5A2,GPR160,LRRC31,LRRC34,LRRIQ4,MIR569,MYNN,PHC3,PRKCI,RNU1-70P,RNU4-38P,RNU6-315P,RNY5P3,RP11-362K14.5,RP11-362K14.6,RP11-362K14.7,RP11-373E16.3,RP11-373E16.4,RP11-379K17.12,RP11-379K17.4,RP11-469J4.3,RP11-543D10.2,RP11-816J6.3,RPL22L1,SAMD7,SEC62,SEC62-AS1,SKIL,SLC2A2,SLC7A14,TNIK,Y_RNA	EIF5A2,PRKCI
T47D	1.82	14:37771201-38133200	DUP	362000	6	FOXA1,MIPOL1,RNU6-886P,RP11-356O9.1,RP11-356O9.2,TTC6	FOXA1
T47D	1.81	9:135697701-136417000	DUP	719300	34	ABO,ADAMTS13,ADAMTSL2,AK8,C9orf9,C9orf96,CACFD1,CEL,GBGT1,GFI1B,GTF3C5,MED22,MIR548AW,OBP2B,RALGDS,REXO4,RNU6-357P,RNU7-21P,RP11-295G24.4,RP11-430N14.4,RPL7A,SLC2A6,SNORD24,SNORD36A,SNORD36B,SNORD36C,SURF1,SURF2,SURF4,SURF6,TMEM8C,TSC1,Y_RNA,snoU13	RALGDS,TSC1
T47D	1.81	3:185395101-186580900	DUP	1185800	32	ADIPOQ,ADIPOQ-AS1,AHSG,C3orf65,CRYGS,DGKG,DNAJB11,EIF4A2,ETV5,ETV5-AS1,FETUB,HRG,IGF2BP2,KNG1,MIR548AQ,RFC4,RN7SL637P,RNU6-1105P,RP11-134F2.2,RP11-48F14.1,RP11-48F14.2,RP11-573D15.2,RP11-573D15.3,RP11-573D15.8,RP11-573D15.9,RP11-78H24.1,SNORA4,SNORA63,SNORA81,SNORD2,TBCCD1,TRA2B	EIF4A2,ETV5
T47D	1.81	3:182371901-183876800	DUP	1504900	34	ABCC5,ABCC5-AS1,AC131160.1,ATP11B,B3GNT5,DCUN1D1,DVL3,HTR3C,HTR3D,HTR3E,HTR3E-AS1,KLHL24,KLHL6,KLHL6-AS1,LAMP3,MAP6D1,MCCC1,MCCC1-AS1,MCF2L2,MIR4448,PARL,RNA5SP151,RP11-225N10.1,RP11-531F16.4,RP11-646E18.2,RP11-646E18.4,RP11-778D9.12,RP11-778D9.13,SNORA4,SNORA63,SNORA81,YEATS2,YEATS2-AS1,Y_RNA	DCUN1D1,KLHL6
T47D	1.8	9:137091201-137218100	DUP	126900	2	RP11-145E17.2,RXRA	RXRA
T47D	1.8	8:144831801-145187500	DUP	355700	19	AC105049.1,CTD-3065J16.6,CTD-3065J16.9,CYC1,EPPK1,EXOSC4,GRINA,MAF1,MIR661,MIR937,OPLAH,PLEC,PUF60,RP11-299M14.2,RP11-429J17.7,RP11-429J17.8,SCRIB,SHARPIN,SPATC1	CYC1,EPPK1
T47D	1.8	9:137218701-138214100	DUP	995400	25	AL390778.1,AL603650.1,AL603650.2,AL603650.3,AL603650.4,COL5A1,COL5A1-AS1,FCN1,FCN2,MIR3689A,MIR3689B,MIR3689C,MIR3689D1,MIR3689D2,MIR3689E,MIR3689F,MIR4669,OLFM1,RP11-399H11.2,RP11-399H11.3,RP11-447M12.2,RP11-473E2.2,RP11-473E2.3,RP11-473E2.4,RXRA	RXRA
T47D	1.8	8:139439901-140714900	DUP	1275000	6	COL22A1,CTD-2534J5.1,FAM135B,RP11-324F11.1,RP11-398H6.1,SNORA25	COL22A1,FAM135B
T47D	1.78	3:185173801-185394400	DUP	220600	4	IGF2BP2,LIPH,MAP3K13,SENP2	MAP3K13
T47D	1.78	9:135361701-135697100	DUP	335400	5	AK8,BARHL1,C9orf171,GTF3C4,RP11-295G24.5	GTF3C4
T47D	1.78	3:176682301-177099300	DUP	417000	6	LINC00501,RNU6-681P,RP11-706D8.3,TBL1XR1,TBL1XR1-AS1,Y_RNA	TBL1XR1
T47D	1.78	9:108149601-109326700	DUP	1177100	8	FKTN,FSD1L,RP11-235C23.5,RP11-308N19.1,RP11-6F6.1,SLC44A1,TAL2,TMEM38B	TAL2
T47D	1.78	9:133223001-134615000	DUP	1392000	29	ABL1,AIF1L,AL354898.1,ASS1,EXOSC2,FAM78A,FIBCD1,FUBP3,HMCN2,LAMC3,NUP214,POMT1,PPAPDC3,PRDM12,PRRC2B,QRFP,RAPGEF1,RN7SL328P,RN7SL665P,RNU6-881P,RP11-334J6.6,RP11-544A12.4,RP11-544A12.8,RP11-83J21.3,SNORA31,SNORD62A,SNORD62B,UCK1,snoU13	ABL1,NUP214
T47D	1.77	8:145501401-145912300	DUP	410900	26	AC084125.3,AC084125.4,ADCK5,ARHGAP39,BOP1,C8orf82,CTD-2517M22.16,CTD-2517M22.17,CTD-2517M22.9,DGAT1,FOXH1,GPT,GS1-393G12.12,GS1-393G12.14,HSF1,KIFC2,LRRC14,LRRC24,MFSD3,MIR1234,MIR939,RECQL4,SCRT1,SLC39A4,SLC52A2,VPS28	RECQL4
T47D	1.77	3:178550901-179008100	DUP	457200	9	KCNMB2,KCNMB3,PIK3CA,RP11-245C23.3,RP11-360P21.2,RP11-385J1.2,SNORA25,Y_RNA,ZMAT3	PIK3CA
T47D	1.77	9:131496501-132001500	DUP	505000	24	AL158151.1,AL158151.2,C9orf114,CCBL1,CRAT,DOLK,DOLPP1,ENDOG,FAM73B,IER5L,LRRC8A,NUP188,PHYHD1,PPP2R4,RP11-101E3.5,RP11-167N5.5,RP11-247A12.1,RP11-247A12.2,RP11-247A12.7,RP11-247A12.8,SH3GLB2,TBC1D13,ZER1,snoU13	PPP2R4
T47D	1.77	8:101782301-102816400	DUP	1034100	22	GRHL2,KB-1107E3.1,KB-1410C5.2,KB-1410C5.3,KB-1410C5.5,KB-1460A1.1,KB-1460A1.3,KB-1460A1.5,KB-1562D12.1,KB-1930G5.3,KB-1930G5.4,NCALD,RN7SKP249,RN7SL563P,RN7SL685P,RNU4-83P,RNU7-67P,RP11-302J23.1,RP11-521I2.3,YWHAZ,Y_RNA,ZNF706	YWHAZ
T47D	1.77	14:34956701-37248200	DUP	2291500	49	AL121594.1,AL162311.1,AL162511.1,AL355885.1,BAZ1A,BRMS1L,CFL2,EAPP,FAM177A1,INSM2,KIAA0391,LINC00609,MBIP,NFKBIA,NKX2-1,NKX2-1-AS1,NKX2-8,PAX9,PSMA6,PTCSC3,RALGAPA1,RN7SKP21,RN7SKP257,RNU1-27P,RNU1-28P,RNU6-1261P,RNU7-41P,RNU7-93P,RP11-116N8.1,RP11-116N8.2,RP11-116N8.4,RP11-259K15.2,RP11-317N8.3,RP11-317N8.5,RP11-561B11.3,RP11-561B11.6,RP11-671J11.4,RP11-671J11.6,RP11-671J11.7,RP11-73E17.2,RP11-8…	NFKBIA,NKX2-1,PAX9
T47D	1.77	8:118110401-120510100	DUP	2399700	17	AC023590.1,COLEC10,EXT1,MAL2,MED30,NOV,RN7SL826P,RNU6-12P,RP11-278I4.2,RP11-4K16.2,RP11-654G14.1,RP11-775B15.2,SAMD12,SLC30A8,SNORA31,SNORA32,TNFRSF11B	EXT1,NOV
T47D	1.77	9:121153101-123854100	DUP	2701000	16	BRINP1,C5,CDK5RAP2,CNTRL,FBXW2,MEGF9,MIR147A,PHF19,PSMD5,PSMD5-AS1,RP11-127L21.1,RP11-295D22.1,RP11-349E4.1,RP11-360A18.1,RP11-360A18.2,TRAF1	CNTRL
T47D	1.76	9:132028401-132983400	DUP	955000	31	AL353803.1,AL360004.1,AL391056.1,ASB6,C9orf106,C9orf50,C9orf78,FNBP1,GPR107,LINC00963,NCS1,NTMT1,PRRX2,PTGES,RN7SL159P,RP11-138E2.1,RP11-344B5.2,RP11-409K20.6,RP11-483H20.4,RP11-483H20.6,RP11-492E3.2,RP11-492E3.51,RP11-65J3.1,RP11-65J3.14,RP11-65J3.15,RP11-65J3.2,RP11-65J3.3,TOR1A,TOR1B,USP20,Y_RNA	FNBP1
T47D	1.76	14:30460401-32854300	DUP	2393900	31	AKAP6,AL136418.1,AP4S1,ARHGAP5,ARHGAP5-AS1,CTD-2213F21.2,CTD-2213F21.3,CTD-2213F21.4,CTD-2251F13.1,DTD2,G2E3,HEATR5A,HECTD1,MIR624,NUBPL,RNU6-455P,RNU6-541P,RNU6-602P,RNU6-7,RNU6-8,RP11-1103G16.1,RP11-159D23.2,RP11-159L20.2,RP11-187E13.1,RP11-187E13.2,RP11-320M16.2,RP11-596D21.1,RP11-829H16.3,SCFD1,STRN3,Y_RNA	STRN3
T47D	1.76	14:33522950-40852896	DUP	7329946	88	AL121594.1,AL157791.1,AL161751.1,AL162311.1,AL162511.1,AL355885.1,AL358340.1,BAZ1A,BRMS1L,CFL2,CLEC14A,CTAGE5,CTD-2058B24.2,CTD-2058B24.3,CTD-2142D14.1,EAPP,EGLN3,EGLN3-AS1,FAM177A1,FBXO33,FOXA1,GEMIN2,INSM2,KIAA0391,LINC00517,LINC00609,LINC00639,MBIP,MIA2,MIPOL1,MIR4503,NFKBIA,NKX2-1,NKX2-1-AS1,NKX2-8,NPAS3,PAX9,PNN,PSMA6,PTCSC3,RALGAPA1,RN7SKP21,RN7SKP257,RNU1-27P,RNU1-28P,RNU6-1261P,RNU6-1277P…	FOXA1,NFKBIA,NKX2-1,PAX9,SSTR1
T47D	1.75	9:136693301-136932800	DUP	239500	4	BRD3,LINC00094,RP11-374P20.4,VAV2	BRD3
T47D	1.75	9:139665201-139922200	DUP	257000	22	ABCA2,C8G,C9orf139,C9orf141,C9orf142,C9orf172,CCDC183-AS1,CLIC3,EDF1,FBXW5,LCN12,MAMDC4,MIR4292,MIR4479,PHPT1,PTGDS,RABL6,RP11-216L13.17,RP11-229P13.19,RP11-229P13.25,TMEM141,TRAF2	TRAF2
T47D	1.75	9:139217001-139474400	DUP	257400	14	C9orf163,DKFZP434A062,DNLZ,GPSM1,INPP5E,MIR4673,MIR4674,NOTCH1,PMPCA,RP11-413M3.4,RP11-611D20.2,SDCCAG3,SEC16A,SNAPC4	NOTCH1
T47D	1.74	9:127809201-129088900	DUP	1279700	13	HSPA5,MAPKAP1,PBX3,PPP6C,RABEPK,RN7SL30P,RNU6-1020P,RP11-12A16.3,RP11-343J18.1,RP11-343J18.2,RP11-423C15.3,RP11-65N13.8,SCAI	PPP6C
T47D	1.73	14:38570601-39226500	DUP	655900	7	AL161751.1,CLEC14A,CTD-2058B24.2,CTD-2142D14.1,LINC00639,RP11-96D24.1,SSTR1	SSTR1
T47D	1.73	8:60929901-62664400	DUP	1734500	19	AC022182.1,AC022182.3,ASPH,CA8,CHD7,CLVS1,MIR4470,RAB2A,RN7SKP97,RNU6-1202P,RP11-163N6.2,RP11-27P7.1,RP11-33I11.2,RP11-787D18.1,RP11-787D18.2,RP11-91I20.1,RP11-91I20.2,RP11-91I20.3,RP11-91I20.4	CHD7
T47D	1.72	9:136933501-136980600	DUP	47100	1	BRD3	BRD3
T47D	1.72	8:38207301-38736900	DUP	529600	15	C8orf86,FGFR1,LETM2,RP11-350N15.3,RP11-350N15.4,RP11-350N15.5,RP11-350N15.6,RP11-495O10.1,RP11-675F6.3,RP11-675F6.4,RP11-723D22.2,RP11-723D22.3,TACC1,WHSC1L1,Y_RNA	FGFR1,LETM2,TACC1,WHSC1L1
T47D	1.72	8:68316201-70156100	DUP	1839900	12	AC022861.1,C8orf34,PREX2,RNA5SP269,RNU7-102P,RP11-21C17.1,RP11-396J6.1,RP11-403D15.2,RP11-600K15.1,RP11-664D7.4,RP11-865I6.2,Y_RNA	PREX2
T47D	1.72	8:89313185-137092201	DUP	47779016	99	AB015752.3,AC016885.1,AC023632.1,AC091096.1,AC105081.1,AC116154.1,AC117834.1,AF070718.1,C8orf37,C8orf87,C8orf88,CCNE2,CDH17,CTD-2006H14.2,CTD-3239E11.2,DPY19L4,ESRP1,FAM92A1,GDF6,GEM,GS1-251I9.2,GS1-251I9.3,GS1-251I9.4,GS1-5L10.1,INTS8,KB-1043D8.6,KB-1043D8.8,KB-1047C11.1,KB-1047C11.2,KB-1184D12.1,KB-1448A5.1,KB-1608C10.2,KIAA1429,LINC00534,LINC00535,LINC01030,LRRC69,MIR3150A,MIR378D2,MIR4661,MMP…	NBN,RUNX1T1,TP53INP1
T47D	1.71	8:41416301-42190400	DUP	774100	19	AGPAT6,ANK1,AP3M2,IKBKB,KAT6A,MIR486,NKX6-3,PLAT,RN7SL149P,RP11-231D20.2,RP11-360L9.4,RP11-360L9.8,RP11-589C21.5,RP11-589C21.6,RP11-930P14.1,RP11-930P14.2,SNORD112,Y_RNA,snoU13	IKBKB,KAT6A
T47D	1.71	8:56824001-57758200	DUP	934200	18	CHCHD7,CTA-397H3.3,LINC00968,LYN,MOS,PENK,PLAG1,RN7SL323P,RN7SL798P,RP11-140I16.3,RP11-17A4.2,RP11-17A4.3,RP11-17A4.4,RP11-446E9.2,RPS20,SDR16C5,SNORA3,SNORD54	LYN,PLAG1
T47D	1.7	20:57268301-57933500	DUP	665200	19	AL035250.1,ATP5E,CTSZ,EDN3,GNAS,GNAS-AS1,MIR296,MIR298,NELFCD,NPEPL1,RP1-309F20.3,RP1-309F20.4,RP11-261P9.4,RP4-614C15.2,RP4-806M20.3,RP4-806M20.5,SLMO2,TUBB1,ZNF831	GNAS
T47D	1.7	9:120077501-121102300	DUP	1024800	8	ASTN2,RNU6-1082P,RP11-281A20.1,RP11-281A20.2,RP11-388N2.1,RP11-500B12.1,TLR4,snoZ13_snr52	TLR4
T47D	1.69	9:106614801-107064500	DUP	449700	2	RP11-82L2.1,SMC2	SMC2
T47D	1.69	1:115043801-115590700	DUP	546900	12	AMPD1,BCAS2,CSDE1,DENND2C,NRAS,RN7SL432P,SIKE1,SYCP1,TRIM33,TSHB,TSPAN2,Y_RNA	NRAS,TRIM33
T47D	1.69	3:181125201-181816900	DUP	691700	8	RN7SKP265,RN7SL703P,RNA5SP150,RP11-275H4.1,RP11-416O18.1,RP11-4B14.3,SOX2,SOX2-OT	SOX2
T47D	1.68	9:131414001-131496000	DUP	82000	8	HMGA1P4,PKN3,RN7SL560P,RP11-545E17.3,SET,WDR34,ZDHHC12,ZER1	SET
T47D	1.68	8:70162101-72214800	DUP	2052700	23	AC090574.1,AC120194.1,EYA1,LACTB2,Metazoa_SRP,NCOA2,PRDM14,RN7SKP29,RN7SL19P,RN7SL675P,RNA5SP270,RNU1-101P,RP11-102F4.2,RP11-159H10.3,RP11-326E22.1,RP11-333A23.4,RP11-382J12.1,RP11-744J10.3,SLCO5A1,SULF1,TRAM1,Y_RNA,snoU13	NCOA2
T47D	1.66	8:42194401-43233700	DUP	1039300	24	AC022616.1,CHRNA6,CHRNB3,DKK4,FNTA,HGSNAT,HOOK3,MIR4469,POLB,POMK,RN7SL806P,RNF170,RNU1-124P,RNU6-104P,RP11-412B14.1,RP11-503E24.2,RP11-503E24.3,RP11-598P20.5,SLC20A2,SMIM19,THAP1,U3,VDAC3,Y_RNA	HOOK3
T47D	1.66	8:95816101-96875100	DUP	1059000	17	AC116154.1,C8orf37,CCNE2,INTS8,KB-1047C11.1,KB-1047C11.2,MIR3150A,NDUFAF6,PLEKHF2,RNU6-1209P,RNU6-690P,RP11-320N21.2,RP11-347C18.3,RP11-347C18.5,RP11-90D11.1,TP53INP1,snoU13	TP53INP1
T47D	1.66	8:54862001-56667000	DUP	1805000	17	AC100817.1,LYPLA1,MRPL15,RGS20,RN7SL250P,RNA5SP265,RNU105C,RNU6ATAC32P,RP1,RP11-30L15.6,RP11-386G21.1,RP11-386G21.2,RP11-53M11.3,RP11-628E19.2,SOX17,TCEA1,XKR4	SOX17
T47D	1.66	20:43067101-45283800	DUP	2216700	78	ACOT8,ADA,AL031663.1,AL031663.2,C20orf62,CD40,CDH22,DBNDD2,DNTTIP1,ELMO2,EPPIN,EPPIN-WFDC6,KCNK15,KCNS1,MATN4,MIR3617,MMP9,NCOA5,NEURL2,OCSTAMP,PABPC1L,PCIF1,PI3,PIGT,PKIG,PLTP,RBPJL,RIMS4,RN7SL31P,RNA5SP485,RNU6ATAC38P,RP11-445H22.3,RP11-445H22.4,RP11-465L10.10,RP3-337O18.9,RP3-461P17.10,RP3-461P17.9,RP5-1013A22.2,RP5-998H6.2,SDC4,SEMG1,SEMG2,SERINC3,SLC12A5,SLC13A3,SLC35C2,SLPI,SNX21,SPATA25,SP…	ADA,YWHAB
T47D	1.65	11:118393325-118492491	DUP	99166	8	ARCN1,IFT46,KMT2A,PHLDB1,RNU6-1157P,RP11-770J1.3,TMEM25,TTC36	KMT2A
T47D	1.65	8:56667701-56823400	DUP	155700	5	AC018607.1,LYN,RP11-318K15.2,SNORA1,TGS1	LYN
T47D	1.65	8:101064601-101781200	DUP	716600	19	ANKRD46,AP001205.1,FBXO43,KB-1083B1.1,KB-1615E4.2,KB-1615E4.3,KB-173C10.1,KB-173C10.2,KB-1991G8.1,MIR4471,PABPC1,POLR2K,RGS22,RNF19A,RNU6-1092P,RNU6ATAC41P,SNX31,SPAG1,Y_RNA	SNX31
T47D	1.65	20:38927501-39825100	DUP	897600	10	MAFB,PLCG1,RNA5SP484,RNU2-52P,RP1-1J6.2,RP3-511B24.6,RP4-644L1.2,SNORD112,TOP1,ZHX3	MAFB,PLCG1,TOP1
T47D	1.65	8:72652901-73949000	DUP	1296100	15	AC104012.1,KCNB2,MSC,RNA5SP271,RNU6-285P,RP11-1145L24.1,RP11-142A23.1,RP11-281N10.1,RP11-313C15.1,RP11-351E7.1,RP11-383H13.1,RP11-531A24.3,TERF1,TRPA1,U8	KCNB2
T47D	1.64	8:38064301-38207100	DUP	142800	6	BAG4,DDHD2,PPAPDC1B,RP11-513D5.2,RP11-513D5.5,WHSC1L1	BAG4,WHSC1L1
T47D	1.64	3:11630424-15410432	DUP	3780008	58	AC026166.1,AC090939.1,AC090952.5,AC090954.1,AC090957.2,AC093495.4,AC093611.1,AC093611.2,C3orf20,C3orf83,CAND2,CHCHD4,FBLN2,FGD5,FGD5-AS1,GRIP2,HDAC11,HDAC11-AS1,IQSEC1,LINC00620,LSM3,MKRN2,MRPS25,NR2C2,NUP210,PPARG,RAF1,RN7SL147P,RNA5SP123,RNA5SP124,RNU6-377P,RNU6-404P,RNU6-454P,RNU6-905P,RP11-169K17.3,RP11-169K17.4,RP11-536I6.1,RP11-536I6.2,RP11-767C1.1,RP11-767C1.2,RP11-95M5.1,RPL32,SH3BP5,SH3B…	RAF1,XPC
T47D	1.63	1:206493501-206696600	DUP	203100	6	C1orf147,IKBKE,RASSF5,RP11-534L20.5,SRGAP2,SRGAP2-AS1	IKBKE
T47D	1.63	12:58063445-58301121	DUP	237676	19	AC025165.1,AGAP2,AGAP2-AS1,CDK4,CTDSP2,MARCH9,METTL1,METTL21B,MIR26A2,OS9,RNU6-1083P,RP11-571M6.17,RP11-571M6.18,RP11-571M6.7,RP11-571M6.8,RP11-620J15.1,RP11-620J15.2,TSFM,TSPAN31	CDK4
T47D	1.63	8:103121901-105558900	DUP	2437000	47	AP001572.1,AP003354.1,AP003356.1,AP003471.2,AP003471.3,AP003550.1,ATP6V1C1,AZIN1,BAALC,C8orf56,CTHRC1,DCAF13,DCSTAMP,DPYS,FZD6,KB-1254G8.1,KB-1507C5.2,KB-1507C5.3,KB-1507C5.4,KB-1639H6.2,KB-1639H6.4,KB-1732A1.1,KB-1980E6.3,KB-431C1.4,KB-431C1.5,KLF10,LRP12,MIR3151,MIR548A3,MIR5680,NCALD,ODF1,RIMS2,RNU6-1011P,RNU6-1224P,RNU6ATAC8P,RP11-1C8.4,RP11-1C8.5,RP11-1C8.6,RP11-1C8.7,RP11-318M2.2,RP11-318M2…	RIMS2,RRM2B
T47D	1.62	1:150717301-151430900	DUP	713600	37	ANXA9,ARNT,BNIPL,C1orf56,CDC42SE1,CTSK,CTSS,FAM63A,GABPB2,LYSMD1,MLLT11,PI4KB,PIP5K1A,POGZ,PRUNE,PSMB4,PSMD4,RFX5,RN7SL444P,RNU6-1309P,RNU6-884P,RNY4P25,RP11-126K1.2,RP11-126K1.6,RP11-126K1.8,RP11-126K1.9,RP11-316M1.12,RP11-316M1.3,RP11-68I18.10,SCNM1,SELENBP1,SEMA6C,SETDB1,TMOD4,TNFAIP8L2,Y_RNA,ZNF687	ARNT
T47D	1.62	8:97783401-99459700	DUP	1676300	24	C8orf47,CPQ,HRSP12,KB-1000E4.2,KB-1208A12.3,KB-1458E12.1,KB-1517D11.4,KB-1958F4.1,KB-1958F4.2,KCNS2,LAPTM4B,MATN2,MTDH,NIPAL2,POP1,RNU6-703P,RNU6-914P,RNU7-177P,RPL30,SNORA72,STK3,TSPYL5,U3,Y_RNA	MTDH
T47D	1.62	1:203945401-205922700	DUP	1977300	52	AC096645.1,AC119673.1,AL161793.1,AL583832.1,CDK18,CNTN2,DSTYK,ELK4,ETNK2,GOLT1A,KISS1,KLHDC8A,LEMD1,LEMD1-AS1,LINC00303,LRRN2,MDM4,MFSD4,MIR135B,NFASC,NUAK2,NUCKS1,PIK3C2B,PLEKHA6,PM20D1,PPP1R15B,RAB7L1,RBBP5,REN,RNA5SP74,RNA5SP75,RNU2-19P,RNU6-418P,RP11-203F10.5,RP11-23I7.1,RP11-383G10.5,RP11-430C7.4,RP11-430C7.5,RP11-576D8.4,RP11-739N20.2,RP11-74C13.3,RP11-74C13.4,RP4-681L3.2,SCARNA20,SLC26A9,S…	MDM4,PIK3C2B,SLC45A3
T47D	1.61	12:48028701-48365300	DUP	336600	10	AC004466.1,ENDOU,HDAC7,RAPGEF3,RP1-197B17.3,RP11-89H19.1,RP5-1057I20.2,RPAP3,SLC48A1,VDR	HDAC7,VDR
T47D	1.61	1:146702301-147425100	DUP	722800	13	ACP6,BCL9,CHD1L,GJA5,GJA8,GPR89B,LINC00624,RN7SL261P,RP11-337C18.10,RP11-433J22.2,RP11-433J22.3,RP11-533N14.3,Y_RNA	BCL9,CHD1L
T47D	1.61	11:117386095-118894272	DUP	1508177	51	AMICA1,AP002954.3,AP002954.4,ARCN1,ATP5L,BCL9L,CCDC84,CD3D,CD3E,CXCR5,DDX6,DSCAML1,FOXR1,FXYD2,FXYD6,FXYD6-FXYD2,IFT46,IL10RA,KMT2A,MIR3656,MIR4492,MPZL2,MPZL3,Metazoa_SRP,PHLDB1,RN7SL529P,RN7SL688P,RN7SL86P,RNU6-1157P,RNU6-376P,RP11-110I1.11,RP11-110I1.12,RP11-158I9.5,RP11-158I9.7,RP11-35P15.1,RP11-728F11.3,RP11-728F11.4,RP11-770J1.3,RP11-770J1.4,RP11-770J1.5,RP11-770J1.7,SCN2B,TMEM25,TMPRSS13,T…	DDX6,KMT2A
T47D	1.6	1:156527101-157005300	DUP	478200	27	AL365181.1,APOA1BP,ARHGEF11,BCAN,CRABP2,GPATCH4,HAPLN2,HDGF,INSRR,IQGAP3,ISG20L2,LRRC71,MIR765,MRPL24,NES,NTRK1,PRCC,RN7SL612P,RP11-284F21.10,RP11-284F21.11,RP11-284F21.7,RP11-284F21.9,RP11-66D17.3,RP11-66D17.5,RRNAD1,SH2D2A,TTC24	CRABP2,NTRK1
T47D	1.6	1:149708301-150405600	DUP	697300	37	AL358813.2,ANP32E,APH1A,BOLA1,C1orf51,C1orf54,CA14,FCGR1A,HIST2H2AA3,HIST2H2AA4,HIST2H2AB,HIST2H2AC,HIST2H2BE,HIST2H2BF,HIST2H3A,HIST2H3C,HIST2H3D,HIST2H4B,MRPS21,MTMR11,OTUD7B,PLEKHO1,PRPF3,RN7SL480P,RNU2-17P,RP11-196G18.21,RP11-196G18.22,RP11-196G18.23,RP11-196G18.24,RP11-196G18.3,RP11-353N4.5,RP4-790G17.7,RPRD2,SF3B4,SV2A,VPS45,snoU13	APH1A
T47D	1.6	12:52507001-53531700	DUP	1024700	46	AC055736.1,AC078864.2,AC107016.2,AC121757.1,C12orf80,EIF4B,IGFBP6,KRT1,KRT18,KRT2,KRT3,KRT4,KRT5,KRT6A,KRT6B,KRT6C,KRT7,KRT71,KRT72,KRT73,KRT74,KRT75,KRT76,KRT77,KRT78,KRT8,KRT80,KRT81,KRT82,KRT83,KRT84,KRT85,KRT86,LINC00592,RP11-1020M18.10,RP11-641A6.2,RP11-641A6.3,RP11-845M18.6,RP11-845M18.7,RP11-983P16.2,RP11-983P16.4,RP3-416H24.1,RP3-416H24.4,SOAT2,SPRYD3,TENC1	KRT73
T47D	1.6	1:201100501-202141200	DUP	1040700	32	AC096677.1,ARL8A,CSRP1,ELF3,GPR37L1,IPO9,IPO9-AS1,LAD1,LMOD1,MIR1231,MIR5191,PHLDA3,PKP1,PTPN7,RNPEP,RNU6-501P,RP11-134G8.7,RP11-134G8.8,RP11-25B7.1,RP11-307B6.3,RP11-465N4.4,RP11-465N4.5,RP11-510N19.5,RP11-567E21.3,RP11-90L20.2,RPS10P7,SHISA4,SNORA70,TIMM17A,TMEM9,TNNI1,TNNT2	ELF3
T47D	1.6	10:5039001-6252000	DUP	1213000	35	AKR1C2,AKR1C3,AKR1CL1,ANKRD16,ASB13,CALML3,CALML3-AS1,CALML5,FAM208B,FBXO18,GDI2,IL15RA,IL2RA,MIR3155A,NET1,PFKFB3,RBM17,RN7SKP78,RN7SL445P,RP11-116G8.5,RP11-318E3.9,RP11-336A10.2,RP11-336A10.4,RP11-336A10.5,RP11-414H17.5,RP11-445P17.3,RP11-445P17.8,RP11-499O7.7,RP11-536K7.3,RP11-536K7.5,RP13-463N16.6,SNORA14,TUBAL3,U8,UCN3	IL2RA
T47D	1.59	20:61263401-61491900	DUP	228500	14	COL9A3,LINC00659,LINC00686,MRGBP,NTSR1,OGFR,OGFR-AS1,RP11-93B14.4,RP11-93B14.5,RP11-93B14.6,RP13-30A9.1,RP13-30A9.2,SLCO4A1,TCFL5	OGFR
T47D	1.59	1:150406501-150700600	DUP	294100	17	ADAMTSL4,ADAMTSL4-AS1,AL356356.1,ECM1,ENSA,GOLPH3L,HORMAD1,LINC00568,MCL1,MIR4257,RN7SL473P,RN7SL600P,RNU6-1042P,RP11-54A4.2,RPRD2,SNORA40,TARS2	MCL1
T47D	1.59	12:57890301-58364300	DUP	474000	33	AC025165.1,AC025165.8,AGAP2,AGAP2-AS1,ARHGEF25,CDK4,CTDSP2,DCTN2,DDIT3,DTX3,KIF5A,MARCH9,MBD6,METTL1,METTL21B,MIR26A2,MIR616,OS9,PIP4K2C,RN7SL312P,RNU6-1083P,RNU6-594P,RP11-571M6.17,RP11-571M6.18,RP11-571M6.7,RP11-571M6.8,RP11-620J15.1,RP11-620J15.2,RP11-620J15.3,TSFM,TSPAN31,XRCC6BP1,snoU13	CDK4,DDIT3
T47D	1.58	11:118226601-119262800	DUP	1036200	60	ABCG4,ACA64,AP002954.3,AP002954.4,AP002956.1,ARCN1,ATP5L,BCL9L,C1QTNF5,C2CD2L,CBL,CCDC153,CCDC84,CXCR5,DDX6,DPAGT1,FOXR1,H2AFX,HINFP,HMBS,HYOU1,IFT46,KMT2A,MCAM,MFRP,MIR3656,MIR4492,NLRX1,PHLDB1,RN7SL529P,RN7SL688P,RN7SL86P,RNF26,RNU6-1157P,RNU6-262P,RNU6-376P,RP11-110I1.11,RP11-110I1.12,RP11-110I1.13,RP11-110I1.14,RP11-110I1.6,RP11-158I9.5,RP11-158I9.7,RP11-334E6.10,RP11-334E6.3,RP11-770J1.3,RP1…	CBL,DDX6,HMBS,KMT2A
T47D	1.57	20:62279401-62371000	DUP	91600	7	ARFRP1,LIME1,RP4-583P15.14,RTEL1,STMN3,TNFRSF6B,ZGPAT	ARFRP1
T47D	1.57	11:117008401-117639700	DUP	631300	11	AP000892.4,BACE1,CEP164,DSCAML1,PAFAH1B2,PCSK7,RNF214,RP11-35P15.1,SCARNA11,SIDT2,TAGLN	PAFAH1B2,PCSK7
T47D	1.56	7:80236811-80262811	DUP	26000	1	CD36	CD36
T47D	1.56	12:54245701-55182400	DUP	936700	51	AC012531.23,AC012531.25,CBX5,COPZ1,DCD,GPR84,HNRNPA1,HOTAIR,HOXC-AS1,HOXC-AS2,HOXC-AS3,HOXC10,HOXC11,HOXC12,HOXC13,HOXC13-AS,HOXC4,HOXC5,HOXC6,HOXC8,HOXC9,LACRT,LINC01154,MIR148B,MIR196A2,MIR3198-2,MIR615,NCKAP1L,NFE2,PDE1B,PPP1R1A,RN7SL390P,RN7SL744P,RNU6-950P,RP11-1049A21.2,RP11-753H16.3,RP11-753H16.5,RP11-834C11.10,RP11-834C11.11,RP11-834C11.12,RP11-834C11.14,RP11-834C11.3,RP11-834C11.4,RP11-8…	HOXC11,HOXC13
T47D	1.56	1:182866701-184538800	DUP	1672100	24	AL137800.1,AL450304.1,APOBEC4,ARPC5,C1orf21,COLGALT2,GS1-115G20.1,LAMC1,LAMC2,NCF2,NMNAT2,RGL1,RN7SL654P,RNA5SP71,RNU6-41P,RP1-127C7.6,RP11-181K3.4,RP11-382D12.1,RP11-382D12.2,RP11-444D13.1,SHCBP1L,SMG7-AS1,TSEN15,Y_RNA	RGL1
T47D	1.55	11:69139801-69514300	DUP	374500	10	AP000439.1,AP000439.2,AP000439.3,AP000439.5,CCND1,FGF19,MYEOV,ORAOV1,RP11-211G23.1,RP11-211G23.2	CCND1,FGF19
T47D	1.54	5:150794001-151143100	DUP	349100	11	ATOX1,CTB-113P19.1,CTB-113P19.3,CTB-113P19.4,CTB-113P19.5,CTC-251D13.1,FAT2,RN7SKP232,RNA5SP197,SLC36A1,SPARC	SPARC
T47D	1.54	1:155781901-156271000	DUP	489100	28	AL355388.1,ARHGEF2,BGLAP,GON4L,KIAA0907,LAMTOR2,LMNA,MEX3A,PAQR6,PMF1,PMF1-BGLAP,RAB25,RIT1,RNU4-19P,RP11-336K24.12,RP11-336K24.5,RXFP4,SCARNA4,SEMA4A,SLC25A44,SMG5,SNORA26,SNORA42,SSR2,SYT11,TMEM79,UBQLN4,VHLL	RAB25,SMG5
T47D	1.54	10:7780301-8310400	DUP	530100	9	ATP5C1,GATA3,GATA3-AS1,ITIH2,KIN,LINC00708,RP11-379F12.3,RP11-379F12.4,TAF3	GATA3
T47D	1.54	12:103901301-104531500	DUP	630200	18	AC078819.1,C12orf73,GLT8D2,HCFC2,HSP90B1,MIR3652,NFYB,RNA5SP370,RP11-341G23.2,RP11-341G23.3,RP11-341G23.4,RP11-626I20.3,RP11-650K20.2,RP11-650K20.3,STAB2,TDG,U8,snoU13	TDG
T47D	1.54	12:53532601-54245400	DUP	712800	26	AAAS,AMHR2,ATF7,ATP5G2,C12orf10,CALCOCO1,CSAD,ESPL1,ITGB7,MFSD5,NPFF,PCBP2,PFDN5,PRR13,RARG,RN7SKP289,RP11-1136G11.8,RP11-680A11.5,RP11-686F15.2,RP11-686F15.3,RP11-793H13.11,RP11-793H13.3,SNORD81,SP1,SP7,ZNF740	RARG
T47D	1.54	12:57161801-57887000	DUP	725200	30	AC023237.1,AC126614.1,ARHGAP9,GLI1,GPR182,HBCBP,HSD17B6,INHBC,INHBE,LRP1,MARS,MIR1228,MYO1A,NAB2,NDUFA4L2,NXPH4,R3HDM2,RDH16,RNU6-879P,RP11-474N8.5,RP11-545N8.3,RP11-756H6.1,SDR9C7,SHMT2,SNORA48,STAC3,STAT6,TMEM194A,Y_RNA,ZBTB39	GLI1,LRP1,STAT6
T47D	1.54	20:29803901-30964500	DUP	1160600	42	AL049539.1,AL121897.1,AL160175.1,ASXL1,BCL2L1,CCM2L,COX4I2,DEFB115,DEFB116,DEFB118,DEFB119,DEFB121,DEFB123,DEFB124,DUSP15,FOXS1,HCK,HM13,HM13-AS1,HM13-IT1,ID1,KIF3B,LINC00028,MIR1825,MIR3193,MYLK2,PDRG1,PLAGL2,POFUT1,REM1,RNA5SP480,RNA5SP481,RNA5SP482,RNU1-94P,RNU6-384P,RP1-310O13.7,RP11-243J16.7,SNORA40,TM9SF4,TPX2,TTLL9,XKR7	ASXL1,BCL2L1,ID1
T47D	1.54	12:64761701-66461800	DUP	1700100	34	AC025262.1,AC090673.1,AC090673.2,C12orf56,GNS,HMGA2,LEMD3,MIR548C,MSRB3,RNA5SP362,RNU6-166P,RNU6ATAC42P,RP11-168J19.2,RP11-221N13.2,RP11-221N13.3,RP11-221N13.4,RP11-230G5.2,RP11-305O6.3,RP11-338E21.1,RP11-338E21.2,RP11-338E21.3,RP11-366L20.2,RP11-366L20.3,RP11-366L20.4,RP11-439H13.2,RP11-629N8.3,RP11-766N7.3,RP11-766N7.4,SNORD83,TBC1D30,TBK1,WIF1,XPOT,snoU13	HMGA2
T47D	1.54	12:48451401-51928700	DUP	3477300	97	AC024257.1,AC073610.5,AC140061.12,ADCY6,ANP32D,AQP5,ARF3,ASB8,ASIC1,ATF1,BCDIN3D,BCDIN3D-AS1,C12orf54,C12orf68,C1QL4,CCDC65,CCNT1,COX14,DDN,DDX23,DHH,DKFZP779L1853,DNAJC22,FAIM2,FAM186A,FAM186B,FMNL3,GPD1,H1FNT,HIGD1C,KCNH3,KMT2D,LALBA,LARP4,LIMA1,LINC00935,MCRS1,METTL7A,MIR1293,MIR4701,NCKAP5L,OR10AD1,OR8S1,PFKM,PRKAG1,PRPF40B,PRPH,RACGAP1,RHEBL1,RN7SL519P,RND1,RNU6-1093P,RNU6-1203P,RNU6-238P,RN…	ATF1,FAIM2,KMT2D,WNT1
T47D	1.54	X:92988572-149178925	DUP	56190353	98	AL008708.1,AL035422.1,AL049610.1,AL109750.1,AL390966.1,AL591708.1,ARMCX1,ARMCX2,ARMCX3,ARMCX3-AS1,ARMCX5,ARMCX6,BEX1,BEX2,BEX4,BEX5,BHLHB9,BTK,CENPI,CSTF2,DIAPH2,DIAPH2-AS1,DRP2,FAM199X,GHc-362H12.3,GLRA4,GPRASP1,GPRASP2,H2BFM,H2BFWT,HNRNPH2,LINC00630,LL0XNC01-116E7.2,LL0XNC01-237H1.2,LL0XNC01-237H1.3,LL0XNC01-250H12.3,MIR548M,MORF4L2,MORF4L2-AS1,NGFRAP1,NOX1,NXF2,NXF2B,NXF3,PCDH19,PLP1,RAB40A,RA…	BTK
T47D	1.53	11:66597601-66711400	DUP	113800	5	C11orf80,LRFN4,MIR3163,PC,RNU7-23P	PC
T47D	1.53	1:153835416-154009059	DUP	173643	10	CREB3L4,GATAD2B,JTB,NUP210L,RAB13,RP11-422P24.10,RP11-422P24.11,RPS27,SLC39A1,U3	RPS27
T47D	1.53	11:69788501-70067500	DUP	279000	10	ANO1,ANO1-AS1,ANO1-AS2,FADD,RNU6-1175P,RP11-626H12.1,RP11-626H12.2,RP11-626H12.3,RP11-805J14.3,RP11-805J14.5	FADD
T47D	1.53	11:45837201-46161000	DUP	323800	10	AC024475.1,C11orf94,CRY2,CTD-2210P24.6,GYLTL1B,MAPK8IP1,PEX16,PHF21A,RP11-618K13.2,RP11-702F3.1	MAPK8IP1
T47D	1.53	10:70001-448000	DUP	378000	6	AL603831.1,DIP2C,RNA5SP297,RNA5SP298,TUBB8,ZMYND11	ZMYND11
T47D	1.53	11:47063801-47579700	DUP	515900	25	AC090559.1,AC090559.2,ACP2,ARFGAP2,C11orf49,CELF1,DDB2,MADD,MIR4487,MYBPC3,NR1H3,PACSIN3,PSMC3,RAPSN,RN7SL652P,RN7SL772P,RNU6-1302P,RP11-17G12.2,RP11-17G12.3,RP11-390K5.3,RP11-390K5.6,RP11-750H9.5,RP11-750H9.7,SLC39A13,SPI1	DDB2
T47D	1.53	20:61725601-62267500	DUP	541900	26	ARFGAP1,BIRC7,C20orf195,CHRNA4,COL20A1,CTD-3184A7.4,EEF1A2,GMEB2,HAR1A,HAR1B,HELZ2,KCNQ2,MIR124-3,MIR3196,MIR4326,NKAIN4,PPDPF,PTK6,RNU6-994P,RP11-261N11.8,RP11-358D14.2,RP4-697K14.3,RP5-963E22.4,RP5-963E22.5,SRMS,YTHDF1	BIRC7,EEF1A2,PTK6
T47D	1.53	11:71389401-71979500	DUP	590100	24	ANAPC15,AP000719.1,AP002490.1,AP002495.1,AP003498.2,CTD-2313N18.5,DEFB108B,FAM86C1,FOLR1,FOLR2,IL18BP,INPPL1,LAMTOR1,LRTOMT,MIR3165,PHOX2A,RNA5SP342,RNF121,RNU6-292P,RP11-167J8.3,RP11-807H22.7,RP11-849H4.2,RP11-849H4.4,snoU13	FOLR2
T47D	1.53	10:3020001-3901500	DUP	881500	14	KLF6,PFKP,PITRM1,PITRM1-AS1,RP11-118K6.2,RP11-118K6.3,RP11-184A2.2,RP11-184A2.3,RP11-195B3.1,RP11-298E9.5,RP11-298E9.6,RP11-464C19.2,RP11-482E14.1,RP11-482E14.2	KLF6
T47D	1.53	11:66713801-67604900	DUP	891100	42	ACY3,ADRBK1,AIP,ALDH3B2,ANKRD13D,AP001885.1,AP003385.1,AP003419.11,AP003419.16,C11orf72,C11orf86,CABP2,CABP4,CARNS1,CDK2AP2,CLCF1,CORO1B,CTC-1337H24.1,CTC-1337H24.2,GPR152,GSTP1,KDM2A,NDUFV1,NUDT8,PC,PITPNM1,POLD4,PPP1CA,PTPRCAP,RAD9A,RHOD,RN7SKP239,RN7SL59P,RNU6-1238P,RP11-655M14.12,RP11-655M14.13,SSH3,SYT12,TBC1D10C,TBX10,U3,snoU13	AIP,CARNS1,GSTP1,KDM2A,PC
T47D	1.53	5:149031401-150583100	DUP	1551700	34	AC010441.1,ANXA6,ARSI,CAMK2A,CCDC69,CD74,CDX1,CTB-140J7.2,CTB-17P3.4,CTC-345K18.2,CTC-367J11.1,DCTN4,GPX3,HMGXB3,IRGM,MIR378A,MYOZ3,NDST1,PDE6A,PDGFRB,PPARGC1B,RN7SL868P,RPS14,SLC26A2,SLC6A7,SMIM3,SYNPO,TCOF1,TIGD6,TNIP1,U3,Y_RNA,ZNF300,snoU13	PDGFRB,RPS14
T47D	1.52	11:65594301-65640600	DUP	46300	3	CFL1,MUS81,SNX32	CFL1
T47D	1.52	11:65473001-65593200	DUP	120200	7	AP5B1,CFL1,KAT5,OVOL1,OVOL1-AS1,RP11-770G2.2,RP11-770G2.5	CFL1
T47D	1.52	11:66783830-66928396	DUP	144566	3	KDM2A,RHOD,SYT12	KDM2A
T47D	1.52	1:154065101-154322300	DUP	257200	17	AL590431.1,AQP10,ATP8B2,C1orf189,C1orf43,HAX1,MIR190B,MIR5698,NUP210L,RN7SL431P,RNU6-121P,RNU6-239P,RNU7-57P,SNORA58,SNORD59,TPM3,UBAP2L	TPM3
T47D	1.52	11:46162401-46630300	DUP	467900	12	AMBRA1,CHRM4,CREB3L1,CTD-2589M5.4,CTD-2589M5.5,DGKZ,HARBI1,MDK,MIR3160-1,MIR4688,RP11-702F3.3,RP11-702F3.4	CREB3L1
T47D	1.52	11:76744901-77253600	DUP	508700	7	B3GNT6,CAPN5,DKFZP434E1119,GDPD4,MYO7A,OMP,PAK1	PAK1
T47D	1.52	12:51930401-52502200	DUP	571800	17	AC068987.1,ACVR1B,ACVRL1,ANKRD33,C12orf44,GRASP,NR4A1,RNU6-574P,RP1-288H2.2,RP1-288H2.4,RP11-1100L3.7,RP11-1100L3.8,RP11-923I11.3,RP11-923I11.4,RP11-923I11.5,RP11-923I11.6,SCN8A	ACVR1B
T47D	1.52	11:65643901-66591500	DUP	947600	55	B3GNT1,BANF1,BRMS1,C11orf68,C11orf80,CATSPER1,CCDC85B,CCDC87,CCS,CD248,CNIH2,CST6,CTD-3074O7.11,CTD-3074O7.12,CTD-3074O7.2,CTD-3074O7.5,CTSF,CTSW,DPP3,DRAP1,EIF1AD,FOSL1,GAL3ST3,KLC2,MRPL11,NPAS4,PELI3,RAB1B,RBM14,RBM14-RBM4,RBM4,RBM4B,RN7SL12P,RNU1-84P,RNU4-39P,RP11-1167A19.2,RP11-658F2.8,RP11-755F10.1,RP11-755F10.3,RP11-867G23.1,RP11-867G23.10,RP11-867G23.12,RP11-867G23.13,RP11-867G23.2,RP11-86…	SPTBN2
T47D	1.52	12:68134301-69240600	DUP	1106300	16	AC124890.1,GS1-410F4.4,IFNG,IFNG-AS1,IL22,IL26,MDM2,NUP107,RAP1B,RP11-611O2.1,RP11-611O2.5,RP11-637A17.2,RP11-71J4.2,RP11-81H14.2,SLC35E3,SNORA70G	MDM2
T47D	1.52	3:37052901-38189700	DUP	1136800	19	AC093415.2,ACAA1,C3orf35,CTDSPL,GOLGA4,ITGA9,LRRFIP2,MIR26A1,MLH1,MYD88,RNA5SP129,RNU6-1301P,RNU7-73P,RP11-259K5.1,RP11-259K5.2,RP11-285J16.1,VILL,Y_RNA,snoU13	C3orf35,MLH1,MYD88
T47D	1.52	1:154361801-155779200	DUP	1417400	61	ADAM15,ADAR,AL606500.1,AL713999.1,ASH1L,ASH1L-AS1,ASH1L-IT1,CHRNB2,CKS1B,CLK2,DAP3,DPM3,EFNA1,EFNA3,EFNA4,FAM189B,FDPS,FLAD1,GBA,GON4L,HCN3,IL6R,KCNN3,KRTCAP2,MIR4258,MIR555,MIR92B,MSTO1,MTX1,MUC1,PBXIP1,PKLR,PMVK,PYGO2,RNU6-106P,RNU6-1297P,RNU7-150P,RP11-201K10.3,RP11-243J18.2,RP11-263K19.4,RP11-263K19.6,RP11-29H23.4,RP11-307C12.11,RP11-307C12.12,RP11-307C12.13,RP11-350G8.5,RP11-350G8.9,RP11-61L…	CKS1B,GBA,IL6R,MUC1,SHC1
T47D	1.52	1:171066001-172593000	DUP	1527000	28	C1orf105,DNM3,DNM3-IT1,DNM3OS,FMO1,FMO2,FMO3,FMO4,METTL13,MIR1295A,MIR199A2,MIR214,MYOC,PIGC,PRRC2C,RN7SL425P,RNU6-157P,RNU6-290P,RNU6-693P,RNU6-773P,RP1-127D3.4,RP1-45C12.1,SCARNA20,SNORD112,SUCO,VAMP4,Y_RNA,snoU13	MYOC
T47D	1.52	12:45877201-48026200	DUP	2149000	23	AMIGO2,ARID2,LINC00938,MIR4494,MIR4698,PCED1B,PCED1B-AS1,RN7SL246P,RNU6-671P,RP1-90J4.1,RP11-352M15.1,RP11-446N19.1,RP11-474P2.2,RP11-474P2.4,RP11-493L12.3,RP11-493L12.4,RP11-493L12.5,RP11-96H19.1,SCAF11,SLC38A1,SLC38A2,SLC38A4,SNORA64	ARID2
T47D	1.51	6:29902201-29920800	DUP	18600	1	HLA-A	HLA-A
T47D	1.51	11:69520001-69717800	DUP	197800	3	AP001888.1,FGF3,FGF4	FGF3,FGF4
T47D	1.51	1:153782601-154063300	DUP	280700	11	CREB3L4,GATAD2B,JTB,NUP210L,RAB13,RNU6-179P,RP11-422P24.10,RP11-422P24.11,RPS27,SLC39A1,U3	RPS27
T47D	1.51	1:216204001-216952400	DUP	748400	4	ESRRG,RP11-22M7.2,RP5-1099E6.3,USH2A	USH2A
T47D	1.51	12:56299801-57161100	DUP	861300	51	ANKRD52,APOF,ATP5B,BAZ2A,CDK2,COQ10A,DGKA,ERBB3,ESYT1,HSD17B6,IKZF4,IL23A,MIP,MYL6,MYL6B,NABP2,NACA,PA2G4,PAN2,PMEL,PTGES3,RAB5B,RBMS2,RN7SL770P,RN7SL809P,RNF41,RNU6-343P,RNU7-40P,RP11-603J24.14,RP11-603J24.17,RP11-603J24.4,RP11-603J24.5,RP11-603J24.6,RP11-603J24.9,RP11-973D8.4,RP11-977G19.10,RP11-977G19.11,RP11-977G19.12,RP11-977G19.14,RP11-977G19.5,RPL41,RPS26,SLC39A5,SMARCC2,SNORD59A,SPRYD4,ST…	ERBB3,NACA
T47D	1.51	12:113012901-113887800	DUP	874900	19	CCDC42B,DDX54,DTX1,IQCD,MIR1302-1,OAS1,OAS2,OAS3,PLBD2,RASAL1,RITA1,RP1-71H24.1,RP11-545P7.4,RPH3A,SDS,SDSL,SLC8B1,TPCN1,Y_RNA	DTX1
T47D	1.51	12:124586501-126097100	DUP	1510600	12	AACS,BRI3BP,FAM101A,MIR5188,NCOR2,RNU6-927P,RP11-158L12.5,RP11-522N14.2,RP11-83B20.1,SCARB1,TMEM132B,UBC	FAM101A,NCOR2
T47D	1.51	10:78378101-81282600	DUP	2904500	31	AC074323.1,AL133481.1,AL391421.1,DLG5,DLG5-AS1,EIF5AL1,KCNMA1,LINC00595,LINC00856,POLR3A,PPIF,RN7SL284P,RNA5SP321,RNU6-1266P,RP11-180I22.2,RP11-31E13.2,RP11-328K22.1,RP11-342M3.1,RP11-342M3.5,RP11-443A13.5,RP11-481G8.2,RP11-619F23.2,RP11-90J7.2,RP11-90J7.4,RP13-39P12.3,RPS24,SNORA31,SNORA71,ZCCHC24,ZMIZ1,ZMIZ1-AS1	ZMIZ1
T47D	1.5	5:38825901-38919800	DUP	93900	2	CTD-2127H9.1,OSMR	OSMR
T47D	1.5	8:139078901-139438000	DUP	359100	3	FAM135B,RP11-238K6.1,RP11-489O18.1	FAM135B
T47D	1.5	12:132150101-132649300	DUP	499200	14	AC137590.1,DDX51,EP400,MMP17,NOC4L,PUS1,RNA5SP378,RNU6-1017P,RP11-417L19.2,RP11-417L19.4,RP11-495K9.5,RP13-820C6.2,SNORA49,ULK1	EP400
T47D	1.5	8:81786801-82596200	DUP	809400	14	FABP4,FABP5,FABP9,IMPA1,PAG1,PMP2,RP11-1149M10.1,RP11-1149M10.2,RP11-157I4.4,RP11-172E10.1,RP11-257P3.3,RP11-363E6.3,RP11-363E6.4,ZNF704	FABP5,PAG1
T47D	1.5	17:60094501-61043300	DUP	948800	14	EFCAB3,MARCH10,MED13,METTL2A,MIR633,MRC2,RNU6-446P,RNU7-52P,RP11-156L14.1,RP11-180P8.1,RP11-453A12.1,RP11-464D20.6,TLK2,Y_RNA	MED13
T47D	1.5	10:102159501-103126500	DUP	967000	33	BTRC,C10orf2,FAM178A,HIF1AN,HUG1,KAZALD1,LBX1,LBX1-AS1,LZTS2,MIR608,MRPL43,NDUFB8,PAX2,RNU2-43P,RNU2-59P,RP11-107I14.2,RP11-107I14.4,RP11-107I14.5,RP11-108L7.14,RP11-108L7.15,RP11-108L7.4,RP11-179B2.2,RP11-285F16.1,RP11-31L23.3,RP11-324L3.1,SEC31B,SEMA4G,SFXN3,SNORD112,TLX1,TLX1NB,WNT8B,Y_RNA	TLX1
T47D	1.5	11:77258001-78388900	DUP	1130900	30	AAMDC,ALG8,AP002789.1,AQP11,GAB2,KCTD14,KCTD21,KCTD21-AS1,NARS2,NDUFC2,NDUFC2-KCTD14,RNU6-126P,RNU6-311P,RNU7-59P,RP11-452H21.1,RP11-452H21.2,RP11-452H21.4,RP11-7I15.3,RP11-7I15.4,RP11-843A23.1,RP11-91P24.5,RP11-91P24.6,RP11-91P24.7,RSF1,RSF1-IT1,RSF1-IT2,TENM4,THRSP,USP35,Y_RNA	ALG8,GAB2
T47D	1.5	1:159652401-160954000	DUP	1301600	49	AL121987.1,AL138930.1,AL138930.2,AL590560.1,ATP1A4,C1orf204,CASQ1,CCDC19,CD244,CD48,CD84,COPA,CRP,DCAF8,DUSP23,IGSF8,IGSF9,ITLN1,ITLN2,KCNJ10,KCNJ9,LINC01133,LY9,NCSTN,NHLH1,PEA15,PEX19,PIGM,RNU4-42P,RP11-190A12.8,RP11-226L15.5,RP11-312J18.6,RP11-404F10.2,RP11-528G1.2,RP11-536C5.2,RP11-536C5.7,RP11-544M22.1,RP11-574F21.2,SLAMF1,SLAMF6,SLAMF7,SLAMF8,SLAMF9,SNORD64,TAGLN2,VANGL2,VSIG8,Y_RNA,hsa-mir…	NCSTN
T47D	1.5	1:175031801-176478200	DUP	1446400	13	KIAA0040,PAPPA2,RNU2-12P,RP11-195C7.1,RP11-222A5.1,RP11-318C24.2,RP11-492I21.1,RP3-518E13.2,RP5-1114G22.2,SCARNA3,TNN,TNR,TNR-IT1	PAPPA2
T47D	1.5	12:69630701-71323900	DUP	1693200	24	CCT2,CNOT2,CPSF6,FRS2,KCNMB4,LRRC10,LYZ,MIR3913-1,MYRFL,PTPRB,PTPRR,RAB3IP,RN7SL804P,RNU4-65P,RP11-1143G9.4,RP11-320P7.1,RP11-320P7.2,RP11-588G21.2,RP11-588H23.3,RP11-611E13.2,RP11-611E13.3,RP11-956E11.1,YEATS4,Y_RNA	FRS2
T47D	1.5	7:27240301-29580300	DUP	2340000	23	AC004009.3,AC004549.6,AC004593.3,AC005013.5,AC005162.4,AC005162.5,AC007096.1,AC007255.8,CHN2,CPVL,CREB5,CTB-113D17.1,EVX1,EVX1-AS,HIBADH,HOTTIP,JAZF1,JAZF1-AS1,RN7SL365P,RNU6-979P,RP1-170O19.17,TAX1BP1,TRIL	JAZF1
T47D	1.5	1:178132001-180625400	DUP	2493400	48	ABL2,ACBD6,AL160286.1,AL358354.1,AL359853.1,ANGPTL1,AXDND1,C1ORF220,C1orf220,CEP350,FAM163A,FAM20B,IFRG15,LHX4,LINC00083,MIR3121,MIR4424,NPHS2,OVAAL,QSOX1,RASAL2,RN7SL230P,RN7SL374P,RNA5SP69,RNU5F-2P,RP11-12M5.1,RP11-12M5.3,RP11-12M5.4,RP11-428K3.1,RP11-502H18.2,RP11-533E19.2,RP11-533E19.5,RP11-533E19.7,RP11-545A16.1,RP11-545A16.4,RP4-593C16.3,RP5-1098D14.1,RP5-1180C10.2,SNORA63,SNORA67,SOAT1,TDR…	ABL2
T47D	1.49	7:26222630-26282413	DUP	59783	3	CBX3,HNRNPA2B1,NFE2L3	NFE2L3
T47D	1.49	10:81288401-81400900	DUP	112500	3	RP11-589B3.6,SFTPA1,SFTPA2	SFTPA1
T47D	1.49	11:60046301-60371600	DUP	325300	8	MS4A1,MS4A12,MS4A13,MS4A14,MS4A4A,MS4A5,MS4A6E,MS4A7	MS4A1
T47D	1.49	7:30096601-30432200	DUP	335600	8	AC007036.4,AC007036.5,AC007036.6,AC007285.7,MIR550A1,MTURN,PLEKHA8,ZNRF2	PLEKHA8
T47D	1.49	9:93275801-93611500	DUP	335700	3	DIRAS2,RP11-555F9.2,SYK	SYK
T47D	1.49	1:176478801-177118100	DUP	639300	3	ASTN1,MIR488,PAPPA2	PAPPA2
T47D	1.49	7:30433201-31315400	DUP	882200	13	AC004691.5,AC005154.6,ADCYAP1R1,AQP1,CRHR2,FAM188B,GARS,GHRHR,GS1-114I9.1,INMT,NOD1,RP4-777O23.1,RP4-777O23.2	NOD1
T47D	1.49	5:141732501-142782100	DUP	1049600	10	AC005215.1,AC005370.1,AC005592.1,AC005592.2,AC005592.3,ARHGAP26,ARHGAP26-AS1,ARHGAP26-IT1,FGF1,NR3C1	ARHGAP26
T47D	1.49	10:99158301-100497000	DUP	1338700	30	AL139239.1,AL355490.1,AL355490.2,ANKRD2,AVPI1,C10orf62,CRTAC1,EXOSC1,GOLGA7B,HPS1,HPSE2,LINC00866,LOXL4,MARVELD1,MIR1287,MIR4685,MMS19,MORN4,PGAM1,PI4K2A,PYROXD2,R3HCC1L,RP11-34A14.3,RP11-452K12.7,RRP12,SFRP5,UBTD1,Y_RNA,ZDHHC16,ZFYVE27	HPSE2
T47D	1.49	8:80345301-81785300	DUP	1440000	24	HEY1,MIR5708,MRPS28,RN7SL107P,RN7SL308P,RN7SL41P,RNU11-6P,RNU2-71P,RNU6-1213P,RNU7-85P,RP11-26J3.1,RP11-26J3.3,RP11-27N21.3,RP11-48B3.3,RP11-48B3.4,RP11-92K15.1,RP11-92K15.3,RP11-941H19.3,SNORA20,STMN2,TPD52,Y_RNA,ZBTB10,ZNF704	HEY1,MRPS28
T47D	1.49	5:167338601-169091900	DUP	1753300	22	CTB-174D11.1,CTB-174D11.2,CTB-178M22.1,CTB-178M22.2,CTB-77H17.1,CTC-353G13.1,CTC-558O2.1,CTC-558O2.2,DOCK2,FBLL1,MIR103A1,MIR218-2,MIR585,PANK3,RARS,RNU6-477P,SLIT3,SNORA40,SPDL1,TENM2,WWC1,Y_RNA	TENM2
T47D	1.49	5:55303901-57323500	DUP	2019600	31	AC008391.1,AC008780.1,AC008937.2,AC008937.3,AC008940.1,AC016644.1,AC022431.2,AC022431.3,AC025470.1,AC116606.1,ACTBL2,ANKRD55,CTC-236F12.4,CTD-2023N9.1,CTD-2023N9.2,CTD-2023N9.3,CTD-2227I18.1,CTD-2310F14.1,GPBP1,MAP3K1,MIER3,RNA5SP184,RNA5SP185,RNU6-299P,RNU6ATAC2P,RP11-155L15.1,RP11-478P10.1,RP11-772C9.1,SETD9,Y_RNA,snoU13	MAP3K1
T47D	1.49	11:34048801-36166100	DUP	2117300	31	ABTB2,AC090692.1,AL137224.1,AL356215.1,CAPRIN1,CAT,CD44,EHF,ELF5,FJX1,LDLRAD3,MIR1343,MIR3973,NAT10,PAMR1,PDHX,RP1-276E15.1,RP1-68D18.2,RP1-68D18.3,RP1-68D18.4,RP11-350D17.2,RP11-698N11.2,RP11-698N11.4,RP4-594L9.2,RP4-607I7.1,RP4-683L5.1,RP5-916O11.2,RP5-945I17.2,SLC1A2,TRIM44,Y_RNA	EHF,SLC1A2
T47D	1.48	1:192835301-193130600	DUP	295300	9	CDC73,GLRX2,LINC01032,MIR1278,RN7SKP126,RP11-101E13.5,TROVE2,UCHL5,snoU109	CDC73
T47D	1.48	12:121574801-121964700	DUP	389900	6	CAMKK2,KDM2B,P2RX4,RNF34,RP11-340F14.5,RP11-711D18.2	KDM2B
T47D	1.48	1:193131701-193532700	DUP	401000	3	B3GALT2,CDC73,LINC01031	CDC73
T47D	1.48	12:123937901-124586000	DUP	648100	23	ATP6V0A2,CCDC92,DNAH10,DNAH10OS,EIF2B1,FAM101A,MIR3908,RILPL1,RP11-214K3.18,RP11-214K3.19,RP11-214K3.20,RP11-214K3.21,RP11-214K3.22,RP11-214K3.23,RP11-214K3.24,RP11-338K17.8,RP11-380L11.3,RP11-380L11.4,RP11-486O12.2,SNORA9,SNRNP35,TMED2,ZNF664	FAM101A
T47D	1.48	7:1313601-2030900	DUP	717300	17	AC074389.1,AC074389.5,AC074389.6,AC074389.7,AC074389.9,AC102953.4,AC102953.6,AC110781.3,ELFN1,INTS1,MAD1L1,MAFK,MIR4655,PSMG3,PSMG3-AS1,RP11-1246C19.1,TMEM184A	MAD1L1
T47D	1.48	20:35344101-36750600	DUP	1406500	24	AL132768.1,BLCAP,CTNNBL1,DSN1,GHRH,LINC00489,MANBAL,MROH8,NDRG3,NNAT,RBL1,RN7SKP185,RN7SL156P,RN7SL237P,RP4-640H8.2,RPN2,RPRD1B,SAMHD1,SOGA1,SRC,TLDC2,TTI1,VSTM2L,Y_RNA	SRC
T47D	1.48	10:13571401-15736000	DUP	2164600	30	ACBD7,AL157392.1,C10orf111,CDNF,DCLRE1C,FAM107B,FAM171A1,FRMD4A,HSPA14,ITGA8,MEIG1,MIR1265,MIR4293,NMT2,OLAH,PRPF18,RNA5SP301,RNA5SP302,RP11-142M10.2,RP11-214D15.2,RP11-25G10.2,RP11-295P9.12,RP11-295P9.3,RP11-295P9.6,RP11-295P9.8,RP11-353M9.1,RP11-397C18.2,RP11-398C13.6,RP11-7C6.1,RPP38	DCLRE1C
T47D	1.48	12:92589801-95152500	DUP	2562700	39	AC138123.1,C12orf74,CCDC41,CLLU1OS,CRADD,EEA1,MIR5700,MRPL42,NUDT4,PLEKHG7,PLXNC1,RN7SKP263,RN7SL330P,RN7SL483P,RN7SL630P,RN7SL737P,RNU6-1329P,RP11-1060G2.1,RP11-1060G2.2,RP11-1105G2.3,RP11-1105G2.4,RP11-202G11.2,RP11-486A14.2,RP11-511B23.1,RP11-511B23.2,RP11-511B23.3,RP11-693J15.4,RP11-693J15.5,RP11-74K11.2,RP11-778J16.3,RP11-887P2.5,RP11-887P2.6,SNORD74,SOCS2,SOCS2-AS1,TMCC3,UBE2N,Y_RNA,snoU13	SOCS2
T47D	1.47	5:55193101-55302700	DUP	109600	6	AC008914.1,CTD-2031P19.3,CTD-2031P19.5,IL31RA,IL6ST,snoU13	IL6ST
T47D	1.47	10:61365801-61985700	DUP	619900	8	ANK3,C10orf40,CCDC6,LINC00948,RP11-135D11.2,RP11-388P9.2,SLC16A9,Y_RNA	CCDC6
T47D	1.47	7:6130501-6900400	DUP	769900	20	AC004895.4,AC073343.1,AC073343.13,AC073343.2,AC079742.4,C7orf26,CCZ1B,CYTH3,FAM220A,FLJ20306,GRID2IP,KDELR2,RAC1,RP11-611L7.1,RSPH10B2,USP42,Y_RNA,ZDHHC4,ZNF12,ZNF853	RAC1
T47D	1.47	10:97785201-98575000	DUP	789800	15	BLNK,CC2D2B,CCNJ,DNTT,ENTPD1-AS1,MIR3157,OPALIN,PIK3AP1,RNA5SP324,RNU6-1274P,RNU6-271P,RP11-35J23.1,TLL2,TM9SF3,ZNF518A	TLL2
T47D	1.47	7:4819201-5854900	DUP	1035700	27	AC006483.1,AC092171.2,AC092171.4,AC093376.1,AC093620.5,ACTB,AP5Z1,CTB-161C1.1,FSCN1,MIR4656,MIR589,MMD2,PAPOLB,RBAK,RBAK-RBAKDN,RBAKDN,RNF216,RNF216-IT1,RNU6-215P,RP11-1275H24.1,RP11-1275H24.2,RP11-1275H24.3,SLC29A4,TNRC18,WIPI2,Y_RNA,snoU13	ACTB
T47D	1.47	7:2031701-4090400	DUP	2058700	27	AC004840.8,AC004840.9,AC004906.3,AC011284.3,AC024028.1,AC069286.1,AC073316.1,AC073316.2,AC091801.1,AMZ1,BRAT1,CARD11,CHST12,EIF3B,FTSJ2,GNA12,GRIFIN,IQCE,LFNG,MAD1L1,MIR4648,NUDT1,RN7SKP130,SDK1,SNX8,TTYH3,snoU13	CARD11,GNA12,LFNG,MAD1L1
T47D	1.47	12:118178501-121289900	DUP	3111400	70	AC002070.1,AC004812.1,AC026366.1,ACADS,AL021546.6,CABP1,CCDC60,CCDC64,CIT,COQ5,DYNLL1,DYNLL1-AS1,GATC,GCN1L1,HSPB8,KSR2,MIR1178,MIR4498,MIR4700,MLEC,MSI1,PEBP1,PLA2G1B,POP5,PRKAB1,PXN,PXN-AS1,RAB35,RFC5,RN7SKP197,RN7SL508P,RNA5SP374,RNF10,RNU4-1,RNU4-2,RNU6-1088P,RP1-127H14.3,RP1-166H1.2,RP11-121J20.1,RP11-131L12.2,RP11-173P15.3,RP11-173P15.5,RP11-173P15.7,RP11-357K6.1,RP11-357K6.2,RP11-357K6.3,R…	RAB35
T47D	1.46	12:1203501-1230800	DUP	27300	1	ERC1	ERC1
T47D	1.46	5:166701-257600	DUP	90900	5	CCDC127,CTD-2083E4.7,LRRC14B,PLEKHG4B,SDHA	SDHA
T47D	1.46	3:36921701-37050900	DUP	129200	7	EPM2AIP1,MLH1,RNU6ATAC4P,RP11-129K12.1,RP11-129K12.3,RP11-129K12.4,TRANK1	MLH1
T47D	1.46	12:121366901-121572800	DUP	205900	7	AC079602.1,C12orf43,HNF1A,HNF1A-AS1,OASL,RP11-216P16.2,SNORA70	HNF1A
T47D	1.46	20:30967801-31308100	DUP	340300	8	ASXL1,C20orf112,C20orf203,COMMD7,RP11-410N8.1,RP11-410N8.3,RP11-410N8.4,RP5-1184F4.5	ASXL1
T47D	1.46	1:160956301-161386200	DUP	429900	28	ACA64,ADAMTS4,AL590714.1,AL591806.1,B4GALT3,C1orf192,DEDD,F11R,FCER1G,KLHDC9,MIR5187,NDUFS2,NIT1,NR1I3,PCP4L1,PFDN2,PPOX,PVRL4,RNU6-481P,RP11-122G18.5,RP11-122G18.8,RP11-297K8.2,RP11-544M22.8,SDHC,TOMM40L,UFC1,USF1,USP21	B4GALT3,SDHC
T47D	1.46	5:38135101-38611700	DUP	476600	11	CTD-2116N24.1,CTD-2207A17.1,CTD-2263F21.1,EGFLAM,EGFLAM-AS1,EGFLAM-AS2,EGFLAM-AS3,EGFLAM-AS4,LIFR,LIFR-AS1,MIR3650	LIFR
T47D	1.46	10:63591901-64129500	DUP	537600	6	AC067742.1,AL671972.1,ARID5B,RN7SL591P,RP11-120C12.3,RTKN2	ARID5B
T47D	1.46	10:76554201-77093100	DUP	538900	12	AL392111.1,COMTD1,DUPD1,DUSP13,KAT6B,RP11-222G7.2,RP11-399K21.11,RP11-77G23.2,RP11-77G23.5,SAMD8,VDAC2,ZNF503-AS1	KAT6B,VDAC2
T47D	1.46	12:145801-1193900	DUP	1048100	28	AC026369.1,B4GALNT3,CCDC77,ERC1,FAM138D,IQSEC3,KDM5A,NINJ2,RAD52,RN7SL852P,RNU4ATAC16P,RNU7-103P,RP11-218M22.1,RP11-218M22.2,RP11-283I3.1,RP11-283I3.2,RP11-283I3.4,RP11-283I3.6,RP11-359B12.2,RP11-598F7.3,RP11-598F7.4,RP11-598F7.5,RP11-598F7.6,RP5-1154L15.1,RP5-1154L15.2,SLC6A12,SLC6A13,WNK1	ERC1,KDM5A
T47D	1.46	7:50410601-51594300	DUP	1183700	10	AC004920.3,AC018705.5,COBL,DDC,FIGNL1,GRB10,IKZF1,RNU6-1091P,RP4-724E13.2,SNORA4	IKZF1
T47D	1.46	12:113889601-115170800	DUP	1281200	17	AC069240.1,LHX5,RBM19,RN7SKP216,RNU7-114P,RP11-100F15.1,RP11-100F15.2,RP11-139B1.1,RP11-162N7.1,RP11-438N16.1,RP11-780K2.1,RP11-82C23.2,RP4-601P9.2,TBX3,TBX5,TBX5-AS1,Y_RNA	TBX3
T47D	1.46	1:166710001-168326400	DUP	1616400	31	ADCY10,CD247,CREG1,DCAF6,DUSP27,GPA33,GPR161,ILDR2,MAEL,MIR1255B2,MPC2,MPZL1,POGK,POU2F1,RCSD1,RNA5SP65,RNU6-1310P,RP1-313L4.3,RP11-102C16.3,RP11-104L21.2,RP11-104L21.3,RP11-277B15.2,RP11-277B15.3,RP11-52A20.2,RP3-455J7.4,RP4-782G3.1,SFT2D2,TADA1,TBX19,TIPRL,snoU13	RCSD1
T47D	1.46	12:110945501-113011500	DUP	2066000	43	AC002395.1,AC002978.1,AC002979.1,AC144522.1,ACAD10,ALDH2,ATXN2,BRAP,CCDC63,CUX2,ERP29,FAM109A,HECTD4,HVCN1,MAPKAPK5,MAPKAPK5-AS1,MIR3657,MYL2,NAA25,PPP1CC,PPTC7,PTPN11,RAD9B,RN7SKP71,RN7SL387P,RNA5SP373,RP1-267L14.3,RP1-46F2.2,RP1-46F2.3,RP1-74B13.2,RP11-162P23.2,RP11-686G8.2,RP3-462E2.3,RP3-462E2.5,RP3-473L9.4,RP3-521E19.2,RPH3A,SH2B3,TCTN1,TMEM116,TRAFD1,U7,Y_RNA	PTPN11,SH2B3
T47D	1.46	12:1247701-3600300	DUP	2352600	43	AC005841.1,ADIPOR2,CACNA1C,CACNA1C-AS1,CACNA1C-AS2,CACNA1C-AS3,CACNA1C-AS4,CACNA1C-IT1,CACNA1C-IT2,CACNA1C-IT3,CACNA2D4,DCP1B,ERC1,FBXL14,FKBP4,ITFG2,LINC00940,LINC00942,LRTM2,MIR3649,NRIP2,PRMT8,RHNO1,RNU6-1315P,RNU7-166P,RP11-253E3.3,RP11-476M19.2,RP11-476M19.3,RP11-885B4.1,RP11-885B4.2,RP4-816N1.6,RP4-816N1.7,RP5-1063M23.1,RP5-1063M23.2,RP5-1096D14.3,RP5-1096D14.6,RP5-951N9.1,RP5-951N9.2,TEAD4…	ERC1
T47D	1.46	12:99967701-103900500	DUP	3932800	49	AC010203.1,AC010209.1,AC068643.1,AC069227.1,ACTR6,ARL1,ASCL1,CHPT1,DRAM1,FAM71C,GAS2L3,GNPTAB,IGF1,LINC00485,MYBPC1,NR1H4,PAH,PARPBP,PMCH,RN7SL176P,RN7SL793P,RNA5SP367,RNA5SP368,RNA5SP369,RNU5E-5P,RNU6-101P,RNU6-1068P,RNU6-1183P,RNU6-172P,RNU6-768P,RNU7-184P,RP11-175P13.2,RP11-263E1.1,RP11-321F8.4,RP11-328J6.1,RP11-350G24.1,RP11-512N21.3,RP11-552I14.1,RP11-554E23.2,RP11-554E23.4,RP11-755O11.2,SCY…	IGF1
T47D	1.46	1:162903793-178351987	DUP	15448194	99	ADCY10,AL049798.1,AL390119.1,AL626787.1,ALDH9A1,ATP1B1,BLZF1,C1orf112,CCDC181,CD247,CREG1,DCAF6,DPT,DUSP27,GPA33,GPR161,ILDR2,LINC00626,LINC00970,LMX1A,LRRC52,MAEL,METTL18,MGST3,MIR1255B2,MIR557,MIR921,MPC2,MPZL1,NME7,NUF2,PBX1,POGK,POU2F1,RCSD1,RGS4,RGS5,RN7SL333P,RNA5SP62,RNA5SP63,RNA5SP64,RNA5SP65,RNA5SP66,RNU5F-6P,RNU6-1310P,RNU6-171P,RNU6-755P,RP1-10C16.1,RP1-117P20.3,RP1-206D15.3,RP1-313L4.…	PBX1,RCSD1,RXRG
T47D	1.45	5:58696201-58784300	DUP	88100	1	PDE4D	PDE4D
T47D	1.45	10:104707101-104862200	DUP	155100	2	CNNM2,NT5C2	NT5C2
T47D	1.45	7:26145701-26323200	DUP	177500	4	CBX3,CTB-119C2.1,HNRNPA2B1,NFE2L3	NFE2L3
T47D	1.45	7:4639701-4818200	DUP	178500	3	AP5Z1,FOXK1,snoU13	FOXK1
T47D	1.45	12:30746301-31272700	DUP	526400	9	DDX11,DDX11-AS1,IPO8,LINC00941,RP11-551L14.4,RP11-551L14.6,RP11-77I22.2,SNORA75,TSPAN11	DDX11
T47D	1.45	10:49354301-49883200	DUP	528900	7	ARHGAP22,ARHGAP22-IT1,FRMPD2,MAPK8,RP11-13E1.5,RP11-534L6.2,RP11-534L6.5	MAPK8
T47D	1.45	7:55289101-55853100	DUP	564000	7	EGFR,LANCL2,RNU6-389P,RP11-310H4.1,RP11-310H4.2,RP11-310H4.3,VOPP1	EGFR
T47D	1.45	1:164911101-165498600	DUP	587500	8	AL390119.1,LMX1A,RNU6-755P,RP11-280O1.2,RP11-38C18.2,RP11-38C18.3,RXRG,SNORD112	RXRG
T47D	1.45	12:96495301-97218700	DUP	723400	8	AC021052.1,CDK17,ELK3,RN7SKP11,RN7SL88P,RNU4-24P,RP11-394J1.2,RP11-510I5.4	ELK3
T47D	1.45	1:161430001-162696800	DUP	1266800	29	ATF6,C1orf111,C1orf226,DDR2,FCGR2A,FCGR2B,FCGR3A,FCGR3B,FCRLA,FCRLB,HSPA6,MIR4654,MIR556,NOS1AP,RN7SL466P,RNA5SP61,RP11-227F8.2,RP11-25K21.1,RP11-25K21.6,RP11-359K18.3,RP11-359K18.4,RP11-474I16.8,RP11-565P22.2,RP11-565P22.6,RP11-5K23.5,SH2D1B,UAP1,UHMK1,Y_RNA	DDR2,FCGR2B
T47D	1.45	10:103126901-104396900	DUP	1270000	36	ACTR1A,AL160011.1,BTRC,C10orf76,C10orf95,CUEDC2,DPCD,ELOVL3,FBXL15,FBXW4,GBF1,HPS6,KCNIP2,KCNIP2-AS1,LDB1,MGEA5,MIR146B,MIR3158-2,NFKB2,NOLC1,NPM3,PITX3,POLL,PPRC1,PSD,RN7SL21P,RNU6-1165P,RNU6-43P,RP11-18I14.10,RP11-18I14.11,RP11-190J1.3,SNORD112,SUFU,TMEM180,Y_RNA,snoU13	NFKB2,SUFU
T47D	1.45	1:185418601-186826100	DUP	1407500	17	AL596220.1,C1orf27,GS1-174L6.4,GS1-204I12.1,GS1-204I12.4,GS1-304P7.3,HMCN1,OCLM,PDC,PLA2G4A,PRG4,PTGS2,RNU6-1240P,RP11-295K2.3,RP5-973M2.2,TPR,Y_RNA	HMCN1,PRG4,PTGS2
T47D	1.45	10:43463701-45524400	DUP	2060700	42	AL137026.1,AL512640.1,C10orf10,C10orf25,CSGALNACT2,CXCL12,FXYD4,HNRNPF,LINC00619,LINC00840,LINC00841,MIR5100,RASGEF1A,RET,RNU6ATAC11P,RNU7-193P,RP11-124O11.2,RP11-168L22.2,RP11-168P8.3,RP11-168P8.5,RP11-20J15.2,RP11-20J15.3,RP11-272J7.4,RP11-285G1.14,RP11-285G1.2,RP11-285G1.9,RP11-351D16.3,RP11-402L1.11,RP11-402L1.4,RP11-517P14.2,RP11-733D4.1,TMEM72,TMEM72-AS1,U3,ZNF22,ZNF239,ZNF32,ZNF32-AS1,ZNF3…	RASGEF1A,RET
T47D	1.44	5:59008701-59056300	DUP	47600	1	PDE4D	PDE4D
T47D	1.44	5:58786901-59008000	DUP	221100	2	MIR582,PDE4D	PDE4D
T47D	1.44	7:72698501-73002300	DUP	303800	9	BAZ1B,FKBP6,FZD9,NSUN5,RNU6-1080P,RNU6-1198P,TBL2,TRIM50,Y_RNA	FZD9
T47D	1.44	7:29690101-30095700	DUP	405600	7	AC007285.6,FKBP14,MIR550A3,PLEKHA8,SCRN1,WIPF3,snoU13	PLEKHA8
T47D	1.44	15:51471401-51996200	DUP	524800	13	AC020892.1,CYP19A1,DMXL2,GLDN,MIR4713,RP11-108K3.1,RP11-108K3.2,RP11-108K3.3,RP11-108K3.4,RP11-313P18.2,RP11-707P17.1,RP11-707P17.2,SCG3	CYP19A1
T47D	1.44	7:73004801-73549700	DUP	544900	16	CLDN3,CLDN4,CTB-51J22.1,DNAJC30,ELN,LIMK1,LINC00035,MIR4284,MLXIPL,RN7SL265P,RP11-731K22.1,STX1A,VPS37D,WBSCR22,WBSCR27,WBSCR28	ELN
T47D	1.44	12:121965201-122530600	DUP	565400	18	AC084018.1,AC156455.1,BCL7A,HPD,KDM2B,MLXIP,MORN3,ORAI1,PSMD9,RHOF,RNU6-1004P,RNU7-170P,RP11-347I19.8,RP11-7M8.2,RP11-87C12.5,RP13-941N14.1,SETD1B,WDR66	BCL7A,KDM2B
T47D	1.44	1:170483601-171065000	DUP	581400	9	BX284613.1,FMO3,GORAB,MROH9,PRRX1,RP1-79C4.1,RP1-79C4.4,RP11-545I10.2,RP11-576I22.2	PRRX1
T47D	1.44	7:26324401-27239100	DUP	914700	31	AC004079.1,AC004540.4,AC004540.5,AC004947.2,C7orf71,HOTAIRM1,HOTTIP,HOXA-AS2,HOXA-AS3,HOXA1,HOXA10,HOXA10-AS,HOXA11,HOXA11-AS,HOXA13,HOXA2,HOXA3,HOXA4,HOXA5,HOXA6,HOXA7,HOXA9,KIAA0087,MIR196B,RP1-170O19.14,RP1-170O19.20,RP1-170O19.21,RP1-170O19.22,RP1-170O19.23,SKAP2,SNX10	HOXA11,HOXA13,HOXA3,HOXA9
T47D	1.44	5:43580001-44734700	DUP	1154700	9	FGF10,FGF10-AS1,NNT,NNT-AS1,RN7SL383P,RNU6-381P,RP11-473L15.3,RP11-503D12.1,RP11-8L21.1	FGF10
T47D	1.44	8:113538301-114742200	DUP	1203900	5	AC107890.1,CSMD3,MIR2053,RP11-67H2.1,snoU13	CSMD3
T47D	1.44	8:48231201-49660500	DUP	1429300	19	AC026904.1,AC103686.1,CEBPD,EFCAB1,MCM4,PRKDC,RNU6-295P,RNU6-519P,RNU6-665P,RP11-567J20.1,RP11-567J20.2,RP11-567J20.3,RP11-697N18.4,RP11-770E5.1,RP11-770E5.2,RP11-770E5.3,SPIDR,UBE2V2,Y_RNA	PRKDC
T47D	1.44	1:157006201-158867500	DUP	1861300	38	ARHGEF11,CD1A,CD1B,CD1C,CD1D,CD1E,CD5L,ETV3,ETV3L,FCRL1,FCRL3,FCRL4,FCRL5,KIRREL,KIRREL-IT1,MNDA,OR10K1,OR10K2,OR10R2,OR10T2,OR10X1,OR10Z1,OR6K2,OR6K3,OR6K6,OR6N1,OR6N2,OR6P1,OR6Y1,RP11-144L1.4,RP11-367J7.3,RP11-404O13.1,RP11-404O13.5,RP11-71G12.1,RP11-85G21.1,RP11-85G21.2,RP11-85G21.3,SPTA1	CD1D,FCRL4,SPTA1
T47D	1.44	11:83811501-86017700	DUP	2206200	17	AP000857.3,AP000974.1,AP003305.1,C11orf73,CCDC83,CCDC89,CTD-2537O9.1,DLG2,EED,PICALM,RNU6-1292P,RNU6-560P,RP11-12D16.2,RP11-90K17.2,SYTL2,TMEM126B,snoU13	EED,PICALM
T47D	1.43	10:51484201-51595900	DUP	111700	4	AGAP7,MSMB,NCOA4,TIMM23	NCOA4
T47D	1.43	12:92420601-92589000	DUP	168400	4	BTG1,C12orf79,RP11-796E2.4,Y_RNA	BTG1
T47D	1.43	3:40938201-41363100	DUP	424900	4	CTNNB1,RP11-372H2.1,RP11-520A21.1,ULK4	CTNNB1
T47D	1.43	5:57894401-58467500	DUP	573100	5	CTD-2176I21.2,PDE4D,RAB3C,RP11-266N13.2,RP11-479O16.1	PDE4D
T47D	1.43	7:79681001-80312200	DUP	631200	7	AC003988.1,AC004862.6,CD36,GNAI1,GNAT3,RN7SL35P,RN7SL869P	CD36
T47D	1.43	8:37008101-37752000	DUP	743900	18	BRF2,ERLIN2,GPR124,PROSC,RAB11FIP1,RNU6-607P,RP11-150O12.1,RP11-150O12.2,RP11-150O12.3,RP11-150O12.4,RP11-150O12.5,RP11-150O12.6,RP11-346L1.2,RP11-527N22.1,RP11-527N22.2,RP11-863K10.2,RP11-863K10.7,ZNF703	GPR124,ZNF703
T47D	1.43	5:59060901-59963400	DUP	902500	6	CTD-2254N19.1,DEPDC1B,FKSG52,PART1,PDE4D,RNU6-806P	PDE4D
T47D	1.43	10:100497301-101891100	DUP	1393800	18	ABCC2,CNNM1,COX15,CPN1,CUTC,DNMBP,DNMBP-AS1,ENTPD7,GOT1,HPSE2,NKX2-3,RP11-129J12.1,RP11-129J12.2,RP11-441O15.3,RP11-483F11.7,RP11-85A1.3,SLC25A28,snoU13	ABCC2,HPSE2
T47D	1.43	10:88666501-90454600	DUP	1788100	34	ADIRF,AGAP11,ATAD1,BMPR1A,FAM25A,FAM35A,GLUD1,KLLN,LINC00863,LINC00864,LIPF,MINPP1,MMRN2,NUTM2A,NUTM2A-AS1,NUTM2D,PAPSS2,PTEN,RN7SL733P,RN7SL78P,RNLS,RNU6-529P,RP11-380G5.2,RP11-57C13.3,RP11-57C13.4,RP11-57C13.6,RP11-96C23.10,RP11-96C23.14,RP11-96C23.15,RP11-96C23.5,RP11-96C23.9,SNCG,SNORD74,Y_RNA	BMPR1A,NUTM2A,PTEN
T47D	1.42	7:5982801-6129800	DUP	147000	11	AC004895.1,AC004895.4,AIMP2,ANKRD61,EIF2AK1,PMS2,RN7SL851P,RNU6-218P,RSPH10B,SNORA42,Y_RNA	EIF2AK1,PMS2
T47D	1.42	1:162698001-163028900	DUP	330900	4	C1orf110,DDR2,HSD17B7,RN7SL861P	DDR2
T47D	1.42	7:66087001-66769400	DUP	682400	13	AC073089.1,KCTD7,MIR4650-1,RN7SL43P,RNU6-1254P,RP11-458F8.4,RP11-792A8.4,RP4-756H11.3,SBDS,TMEM248,TYW1,Y_RNA,snoU13	SBDS
T47D	1.42	7:74991701-75895600	DUP	903900	16	AC006014.1,CCL24,CCL26,HIP1,MDH2,MIR4651,POR,RHBDD2,RN7SL642P,RNU6-863P,SNORA14A,SRRM3,STYXL1,TRIM73,Y_RNA,snoU13	HIP1
T47D	1.42	10:90455601-91756100	DUP	1300500	31	ACTA2,ACTA2-AS1,AL353751.1,ANKRD22,CH25H,FAS,IFIT1,IFIT1B,IFIT2,IFIT3,IFIT5,KIF20B,LINC00865,LIPA,LIPK,LIPM,LIPN,MIR107,MIR4679-2,PANK1,RP11-149I23.3,RP11-168O10.6,RP11-399O19.9,RP11-478K7.2,RP11-80H5.2,RP11-80H5.6,RP11-80H5.7,RP11-80H5.9,SLC16A12,STAMBPL1,snoU13	FAS,LIPM
T47D	1.42	12:44546701-45875700	DUP	1329000	8	ANO6,DBX2,NELL2,RNA5SP361,RP11-352M15.1,RP11-46I1.1,RP11-478B9.1,Y_RNA	NELL2
T47D	1.42	11:58596001-60045600	DUP	1449600	41	AP000442.1,AP000442.4,AP000640.10,AP000640.2,AP001257.1,AP001258.4,AP001652.1,DTX4,FAM111A,FAM111B,GIF,GLYATL1,GLYATL2,MIR3162,MPEG1,MRPL16,MS4A2,MS4A3,MS4A6A,OOSP1,OOSP2,OR10V1,OR4D10,OR4D11,OR4D6,OR4D9,OR5A1,OR5A2,OR5AN1,OSBP,PATL1,RN7SKP192,RN7SL42P,RN7SL435P,RNU6-779P,RNU7-58P,RP11-1036E20.9,RP11-142C4.6,RP11-736I10.1,RP11-780O24.2,STX3	DTX4
T47D	1.42	3:42954301-44747600	DUP	1793300	34	ABHD5,AC099669.1,AC104434.1,ANO10,KRBOX1,KRBOX1-AS1,LINC00694,MIR138-1,POMGNT2,RN7SL517P,RNU6-367P,RP11-136C24.2,RP11-188P20.3,RP11-348P10.2,RP11-424N24.2,RP11-944L7.4,RP11-944L7.5,RP4-555D20.2,RP4-555D20.3,RP4-555D20.4,RP4-672N11.1,SNRK,SNRK-AS1,TCAIM,TOPAZ1,Y_RNA,ZKSCAN7,ZNF197,ZNF197-AS1,ZNF35,ZNF445,ZNF660,ZNF662,ZNF852	SNRK
T47D	1.42	10:86217501-88666200	DUP	2448700	24	AC091487.1,AL732479.1,BMPR1A,CCSER2,GRID1,LDB3,MIR346,OPN4,RN7SKP238,RN7SKP84,RNA5SP322,RNU1-19P,RNU6-325P,RNU6-780P,RP11-113E21.1,RP11-181F12.1,RP11-359E3.4,RP11-475D12.1,RP11-475D12.2,RP11-77P6.2,RP11-93H12.2,RP11-93H12.4,U3,WAPAL	BMPR1A,GRID1,WAPAL
T47D	1.42	3:40910059-44748158	DUP	3838099	64	ABHD5,AC092048.1,AC099537.1,AC099669.1,AC104434.1,ACKR2,ANO10,CCDC13,CCDC13-AS1,CCK,CTNNB1,CYP8B1,HHATL-AS1,KLHL40,KRBOX1,KRBOX1-AS1,LINC00694,LYZL4,MIR138-1,NKTR,POMGNT2,RN7SKP58,RN7SL517P,RN7SL567P,RNU4-78P,RNU6-367P,RP11-136C24.2,RP11-141M3.5,RP11-188P20.3,RP11-348P10.2,RP11-372H2.1,RP11-424N24.2,RP11-520A21.1,RP11-70C1.1,RP11-70C1.3,RP11-944L7.4,RP11-944L7.5,RP4-555D20.2,RP4-555D20.3,RP4-555D…	CTNNB1,SNRK
T47D	1.42	7:39056001-43347400	DUP	4291400	38	AC004692.4,AC004837.4,AC004837.5,AC004988.1,AC005022.1,AC005027.3,AC005029.1,AC005160.3,AC005537.2,AC010132.10,AC011290.4,AC027269.2,AC092174.1,C7orf25,CDK13,GLI3,HECW1,HECW1-IT1,INHBA,INHBA-AS1,LINC00265,MIR3943,MPLKIP,MRPL32,POU6F2,POU6F2-AS1,PSMA2,RALA,RN7SL496P,RNU6-575P,RNU6-719P,RNU7-35P,RP11-111K18.2,RP11-467D6.1,SNORA20,SUGCT,YAE1D1,Y_RNA	INHBA
T47D	1.42	10:91758401-97061900	DUP	5303500	61	AL158040.1,AL161652.1,AL356214.1,ANKRD1,BTAF1,CEP55,CPEB3,CPEB3_ribozyme,CYP26A1,CYP26C1,CYP2C18,CYP2C19,CYP2C9,EXOC6,FFAR4,FGFBP3,FRA10AC1,HECTD2,HELLS,HHEX,HTR7,IDE,KIF11,LGI1,LINC00502,MARCH5,NOC3L,PCGF5,PDE6C,PDLIM1,PLCE1,PLCE1-AS1,PPP1R3C,RBP4,RN7SKP143,RN7SL644P,RNA5SP323,RNU6-657P,RNU6-740P,RNY4P26,RP11-119K6.6,RP11-15K3.1,RP11-162K11.4,RP11-236B18.2,RP11-236B18.5,RP11-310E22.4,RP11-310E22…	CYP2C19,CYP2C9,PLCE1
T47D	1.42	10:82137404-104862052	DUP	22724648	100	AC091487.1,ACTA2,ACTA2-AS1,ADIRF,AGAP11,AL096864.1,AL353751.1,AL356140.1,AL356154.1,AL732479.1,ANKRD22,ATAD1,BMPR1A,C10orf99,CCSER2,CDHR1,CH25H,FAM213A,FAM25A,FAM35A,FAS,GHITM,GLUD1,GRID1,IFIT2,IFIT3,KLLN,LDB3,LINC00858,LINC00863,LINC00864,LIPA,LIPF,LIPK,LIPM,LIPN,LRIT1,LRIT2,MINPP1,MIR346,MIR4679-2,MMRN2,NRG3,NRG3-AS1,NUTM2A,NUTM2A-AS1,NUTM2D,OPN4,PAPSS2,PTEN,RGR,RN7SKP238,RN7SKP84,RN7SL733P,RN7…	BMPR1A,FAS,GRID1,LIPM,NUTM2A,PTEN,WAPAL
T47D	1.41	8:90827101-91006400	DUP	179300	3	NBN,OSGIN2,RNU6-925P	NBN
T47D	1.41	5:58468401-58691400	DUP	223000	1	PDE4D	PDE4D
T47D	1.41	5:166778201-167334000	DUP	555800	4	AC093304.1,CTB-78F1.1,CTB-78F1.2,TENM2	TENM2
T47D	1.41	1:220264501-220908500	DUP	644000	14	AC096644.1,C1orf115,IARS2,MARK1,MIR194-1,MIR215,RAB3GAP2,RN7SL464P,RP11-302I18.3,RP11-322F10.2,RP11-410C4.4,RP11-410C4.5,SNORA36B,snoU13	MARK1
T47D	1.41	12:31275901-31951700	DUP	675800	13	AC023157.1,AC024940.1,AMN1,DENND5B,DENND5B-AS1,H3F3C,METTL20,RNU5F-4P,RNU6-318P,RNU6-618P,RP11-771K4.1,Y_RNA,snoU13	H3F3C
T47D	1.41	11:56844701-57814300	DUP	969600	31	AP000662.4,AP000781.1,BTBD18,C11orf31,CLP1,CTNND1,LRRC55,MED19,MIR130A,OR6Q1,OR9Q1,P2RX3,PRG2,PRG3,RN7SKP259,RNA5SP341,RNU6-899P,RP11-624G17.3,RP11-659P15.1,RP11-872D17.4,RTN4RL2,SERPING1,SLC43A1,SLC43A3,SMTNL1,SSRP1,TIMM10,UBE2L6,Y_RNA,ZDHHC5,snoU13	CLP1
T47D	1.41	11:43333001-44572100	DUP	1239100	21	ACCS,ACCSL,ALKBH3-AS1,ALX4,API5,C11orf96,CTD-2609K8.3,EXT2,HSD17B12,MIR129-2,MIR670,RN7SKP287,RP11-484D2.2,RP11-484D2.4,RP11-484D2.5,RP11-58K22.1,RP11-613D13.4,RP11-613D13.5,RP11-613D13.8,TTC17,Y_RNA	EXT2
T47D	1.41	8:112296901-113537600	DUP	1240700	5	AC024996.1,CSMD3,RNU4-37P,RP11-1101K5.1,RP11-58O3.2	CSMD3
T47D	1.41	5:155188701-158893600	DUP	3704900	49	AC008694.3,AC008697.1,AC008703.1,AC010609.1,AC026407.1,AC106801.1,C5orf52,CLINT1,CTB-109A12.1,CTB-11I22.1,CTB-11I22.2,CTB-120L21.1,CTB-47B11.3,CTB-4E7.1,CTC-248O19.1,CTC-340I23.2,CTC-436K13.1,CTC-436K13.2,CTC-436K13.3,CTC-436K13.5,CTC-436K13.6,CTD-2363C16.1,CTD-2363C16.2,FAM71B,FNDC9,HAVCR1,HAVCR2,IL12B,ITK,LSM11,MED7,NIPAL4,RNA5SP199,RNF145,RNU2-48P,RNU4ATAC2P,RNU6-260P,RNU6-390P,RNU6-556P,RP11-…	ITK
T47D	1.4	7:50165101-50370600	DUP	205500	5	AC020743.2,AC020743.3,AC020743.4,C7orf72,IKZF1	IKZF1
T47D	1.4	12:25327801-25669900	DUP	342100	6	AC087239.1,CASC1,IFLTD1,KRAS,LYRM5,RNU4-67P	KRAS
T47D	1.4	10:70356001-70905200	DUP	549200	16	CCAR1,DDX21,DDX50,KIAA1279,MIR1254-1,RN7SL373P,RNU6-571P,RNU6-697P,RP11-119F7.5,SNORD98,SRGN,STOX1,TET1,VPS26A,Y_RNA,snoU13	TET1
T47D	1.4	10:54018201-54593600	DUP	575400	6	DKK1,MBL2,PRKG1,PRKG1-AS1,RP11-346D6.6,RP11-556E13.1	DKK1,PRKG1
T47D	1.4	7:86615801-87333300	DUP	717500	12	ABCB1,ABCB4,AC005076.5,CROT,CTA-254O6.1,DMTF1,KIAA1324L,RUNDC3B,TMEM243,TP53TG1,Y_RNA,snoU13	ABCB1
T47D	1.4	1:226152601-226985500	DUP	832900	15	ACBD3,C1orf95,H3F3A,ITPKB,ITPKB-AS1,ITPKB-IT1,LIN9,MIXL1,PARP1,RN7SKP165,RP11-275I14.4,RP11-396C23.2,RP11-396C23.4,SDE2,snoU13	H3F3A,PARP1
T47D	1.39	10:69819901-70355400	DUP	535500	12	ATOH7,DNA2,HERC4,HNRNPH3,MYPN,PBLD,RN7SKP202,RNA5SP319,RP11-153K11.3,SLC25A16,TET1,Y_RNA	TET1
T47D	1.39	7:54465401-55287600	DUP	822200	9	EGFR,EGFR-AS1,GS1-18A18.1,GS1-18A18.2,RNU6-1125P,RP11-745C15.2,SEC61G,SNORA73,VSTM2A	EGFR
T47D	1.39	7:76668401-77699300	DUP	1030900	15	AC073635.5,CCDC146,DTX2P1-UPK3BP1-PMS2P11,FGL2,MAGI2,PHTF2,PTPN12,RP11-467H10.2,RP5-1185I7.1,RP5-899E9.1,RSBN1L,RSBN1L-AS1,TMEM60,Y_RNA,snoU13	MAGI2
T47D	1.39	1:163685001-164910500	DUP	1225500	8	PBX1,RNU5F-6P,RNU6-171P,RP11-477H21.2,RP11-506O24.1,RP11-506O24.2,U3,Y_RNA	PBX1
T47D	1.39	11:93682301-94940300	DUP	1258000	23	AMOTL1,ANKRD49,AP000765.1,CWC15,ENDOD1,FOLR4,FUT4,GPR83,HEPHL1,KDM4D,KDM4E,LINC01171,MIR548L,MRE11A,PANX1,RP11-680H20.2,RP11-685N10.1,RP11-712B9.2,RP11-856F16.2,RP11-867G2.5,RP11-867G2.6,RP11-867G2.8,SESN3	AMOTL1,MRE11A
T47D	1.38	7:73629501-73828500	DUP	199000	4	CLIP2,LAT2,RFC2,RNU6-1070P	CLIP2
T47D	1.38	12:40540901-40882000	DUP	341100	5	AC079630.2,AC079630.4,LRRK2,MUC19,RP11-115F18.1	LRRK2
T47D	1.38	11:108457401-108833500	DUP	376100	2	DDX10,EXPH5	DDX10
T47D	1.38	17:61837001-62213100	DUP	376100	18	C17orf72,CCDC47,CD79B,CSH1,CSH2,CSHL1,CTC-264K15.6,DDX42,ERN1,FTSJ3,GH1,GH2,ICAM2,PSMC5,RN7SL805P,RP11-214C8.2,SCN4A,SMARCD2	CD79B
T47D	1.38	12:77862901-78354300	DUP	491400	4	AC073528.1,NAV3,RP1-34H18.1,RP11-781A6.1	NAV3
T47D	1.38	7:80851801-81441600	DUP	589800	3	AC008163.4,AC010091.1,HGF	HGF
T47D	1.38	12:78355601-79270300	DUP	914700	8	NAV3,RP11-123M21.1,RP11-136F16.1,RP11-171L9.1,RP11-38F22.1,RP11-754N21.1,RP11-90C1.1,SYT1	NAV3
T47D	1.38	1:210892101-212471200	DUP	1579100	30	AC092017.1,AL356310.1,DTL,INTS7,KCNH1,KCNH1-IT1,LINC00467,LPGAT1,MIR3122,NEK2,PPP2R5A,RCOR3,RD3,RN7SKP98,RN7SL344P,RP11-122M14.1,RP11-122M14.3,RP11-15I11.2,RP11-15I11.3,RP11-318L16.6,RP11-354K1.2,RP11-359E8.3,RP11-359E8.5,RP11-384C4.6,RP11-543B16.3,RP11-552D8.1,SLC30A1,SNORA26,TRAF5,Y_RNA	TRAF5
T47D	1.38	7:20319801-23622600	DUP	3302800	41	ABCB5,AC002480.2,AC002480.3,AC002480.4,AC002480.5,AC004595.1,AC005082.1,AC005082.12,AC005682.5,AC005682.8,AC073072.5,AC099342.1,AC099759.1,CDCA7L,CTA-293F17.1,DNAH11,FAM126A,GPNMB,IGF2BP3,IL6,ITGB8,KLHL7,KLHL7-AS1,LINC01162,MALSU1,MIR1183,NUPL2,RAPGEF5,RN7SL542P,RNA5SP227,RNU1-15P,RNU7-143P,SNORD56,SNORD65,SNORD93,SP4,SP8,STEAP1B,TOMM7,TRA2A,Y_RNA	IL6
T47D	1.37	5:166506701-166777300	DUP	270600	6	CTB-105L4.2,CTB-180C19.1,CTC-264O10.1,CTC-264O10.2,CTC-286N12.1,TENM2	TENM2
T47D	1.37	1:236920501-237240000	DUP	319500	4	ACTN2,MT1HL1,MTR,RYR2	RYR2
T47D	1.37	11:101574401-102699100	DUP	1124700	21	ANGPTL5,BIRC2,BIRC3,C11orf70,KIAA1377,MMP1,MMP10,MMP20,MMP27,MMP7,MMP8,RNU6-952P,RP11-315O6.1,RP11-315O6.2,RP11-732A21.2,RP11-817J15.2,RP11-817J15.3,RP11-864G5.3,TMEM123,YAP1,snoU13	BIRC2,BIRC3,YAP1
T47D	1.37	17:55092901-56302200	DUP	1209300	26	AKAP1,CCDC182,CUEDC1,DYNLL2,EPX,LPO,MKS1,MRPS23,MSI2,OR4D1,OR4D2,RN7SKP94,RN7SL437P,RN7SL449P,RNU7-134P,RP11-118E18.2,RP11-118E18.4,RP11-159D12.10,RP11-159D12.2,RP11-159D12.5,RP11-166P13.3,RP11-166P13.4,RP11-343K8.3,RP11-60A24.3,SRSF1,VEZF1	MSI2,VEZF1
T47D	1.37	11:111052401-114471900	DUP	3419500	81	ALG9,ALG9-IT1,ANKK1,AP000908.1,AP002884.1,AP002884.2,AP002884.3,BCO2,BTG4,C11orf1,C11orf52,C11orf53,C11orf57,C11orf71,C11orf88,CLDN25,COLCA1,COLCA2,CRYAB,DIXDC1,DLAT,DRD2,FDXACB1,HSPB2,HTR3A,HTR3B,IL18,LAYN,MIR34B,MIR34C,MIR4301,MIR4491,NCAM1,NCAM1-AS1,NNMT,NXPE1,NXPE4,PIH1D2,PLET1,POU2AF1,PPP2R1B,PTS,RBM7,REXO2,RN7SKP273,RNA5SP351,RNU2-60P,RNU6-1107P,RNU6-44P,RNU6-893P,RNU7-187P,RP11-108O10.2,RP…	POU2AF1,SDHD,ZBTB16
T47D	1.36	21:46283001-46305100	DUP	22100	1	PTTG1IP	PTTG1IP
T47D	1.36	17:66485701-66571400	DUP	85700	5	AC079210.1,FAM20A,PRKAR1A,RP11-120M18.2,RP11-120M18.5	PRKAR1A
T47D	1.36	17:56302901-56554100	DUP	251200	8	AC023992.1,BZRAP1-AS1,HSF5,LPO,MIR142,MIR4736,MPO,RNF43	MIR142,RNF43
T47D	1.36	7:77700101-78202300	DUP	502200	1	MAGI2	MAGI2
T47D	1.36	17:61044201-61813800	DUP	769600	18	AC015923.1,AC037445.1,ACE,CYB561,DCAF7,KCNH6,LIMD2,MAP3K3,RNU6-288P,RP11-180P8.3,RP11-269G24.2,RP11-269G24.3,RP11-269G24.4,RP11-269G24.6,RP11-556O9.2,STRADA,TACO1,TANC2	MAP3K3,STRADA
T47D	1.36	11:99690901-101275800	DUP	1584900	8	AC015600.1,ARHGAP42,CTD-2383M3.1,PGR,RN7SKP115,RN7SL222P,TMEM133,snoU13	PGR
T47D	1.36	11:29409201-32544100	DUP	3134900	32	AC108456.1,AL133376.1,AL162614.1,ARL14EP,CTD-3012A18.1,CTD-3138F19.1,DNAJC24,ELP4,FSHB,KCNA4,MPPED2,PAX6,RCN1,RN7SL240P,RP1-17K7.1,RP1-17K7.2,RP1-17K7.3,RP1-296L11.1,RP1-65P5.3,RP1-65P5.5,RP11-215H22.1,RP11-460B17.2,RP11-460B17.3,RP11-624D11.2,RP4-710M3.2,RP5-1024C24.1,RP5-1027O15.1,U3,WT1,WT1-AS,Z83001.1,Z83307.3	WT1
T47D	1.35	10:53618401-54004400	DUP	386000	2	PRKG1,PRKG1-AS1	PRKG1
T47D	1.35	7:86133201-86615400	DUP	482200	4	AC005009.1,AC005009.2,GRM3,KIAA1324L	GRM3
T47D	1.35	21:42398101-42955600	DUP	557500	13	AP001610.5,AP001610.9,AP006748.1,BACE2,BACE2-IT1,FAM3B,LINC00323,MIR3197,MX1,MX2,PLAC4,SNORA32,TMPRSS2	TMPRSS2
T47D	1.35	11:27637101-29007200	DUP	1370100	13	BDNF,BDNF-AS,KIF18A,LINC00678,METTL15,MIR610,RN7SKP158,RP11-115J23.1,RP11-22P4.1,RP11-22P4.2,RP11-406D1.2,RP11-587D21.4,RP11-960D24.1	BDNF
T47D	1.35	11:92246401-93680500	DUP	1434100	27	AP004242.1,C11orf54,CCDC67,FAT3,KIAA1731,MED17,MIR1304,MTNR1B,RN7SL195P,RN7SL223P,RP11-203F8.1,RP11-676F20.1,RP11-755E23.3,SCARNA9,SLC36A4,SMCO4,SNORA1,SNORA18,SNORA25,SNORA32,SNORA40,SNORA8,SNORD5,SNORD6,VSTM5,Y_RNA,snoU13	FAT3
T47D	1.34	12:1231801-1247000	DUP	15200	1	ERC1	ERC1
T47D	1.34	11:92146201-92245600	DUP	99400	1	FAT3	FAT3
T47D	1.34	17:62884401-63076100	DUP	191700	7	GNA13,LRRC37A3,RP11-583F2.2,RP11-583F2.5,RP11-927P21.1,RP11-927P21.11,RP11-927P21.2	GNA13
T47D	1.34	11:107817401-108457200	DUP	639800	12	ACAT1,AP001925.1,AP005718.1,ATM,C11orf65,CUL5,EXPH5,KDELC2,NPAT,RAB39A,RP11-144G7.2,Y_RNA	ATM
T47D	1.34	11:106581301-107234200	DUP	652900	4	AP001282.1,CWF19L2,GUCY1A2,RP11-819C21.1	GUCY1A2
T47D	1.34	11:95367801-96287600	DUP	919800	12	CCDC82,CEP57,FAM76B,JRKL,JRKL-AS1,MAML2,MIR1260B,MTMR2,RNA5SP345,RNA5SP346,RP11-49K4.2,RP11-644L4.1	CEP57
T47D	1.34	10:68127901-69485600	DUP	1357700	5	CTNNA3,LRRTM3,RP11-344A5.1,snoR442,snoU13	CTNNA3
T47D	1.34	7:17266201-19865000	DUP	2598800	26	AC003075.4,AC003986.5,AC003986.6,AC003986.7,AC004543.1,AC004543.2,AC004744.3,AC006482.1,AC007091.1,AC010082.2,AC017060.1,AC019117.1,AC019117.2,AC080080.1,AC091697.1,AHR,FERD3L,HDAC9,MIR1302-6,MIR3146,PRPS1L1,RN7SKP266,SNORA63,SNX13,TMEM196,TWISTNB	HDAC9
T47D	1.33	5:160643601-161073000	DUP	429400	3	AC022120.1,GABRA6,GABRB2	GABRA6
T47D	1.32	11:106509801-106579800	DUP	70000	1	GUCY1A2	GUCY1A2
T47D	1.32	11:91839801-92144100	DUP	304300	2	FAT3,RP11-675M1.2	FAT3
T47D	1.32	10:52737501-53313400	DUP	575900	6	AC022537.1,MIR605,PRKG1,RP11-40C11.2,RP11-539E19.2,RP11-96B5.3	PRKG1
T47D	1.32	11:57821401-58594200	DUP	772800	19	AP000445.3,AP001350.1,CNTF,GLYAT,OR10Q1,OR10W1,OR1S1,OR1S2,OR5B12,OR5B17,OR5B2,OR5B21,OR5B3,OR9I1,OR9Q1,OR9Q2,RP11-655C2.3,RP11-659P15.1,ZFP91	ZFP91
T47D	1.32	7:13411001-14251200	DUP	840200	5	AC005019.3,AC011288.2,DGKB,ETV1,Y_RNA	ETV1
T47D	1.31	10:53314501-53495200	DUP	180700	3	AC068062.1,CSTF2T,PRKG1	PRKG1
T47D	1.31	5:161073801-161356200	DUP	282400	3	GABRA1,GABRA6,RP11-348M17.2	GABRA6
T47D	1.31	11:87786701-88381000	DUP	594300	10	CTSC,GRM5,GRM5-AS1,MIR3166,RAB38,RNU6-16P,RP11-164N3.1,RP11-164N3.2,RP11-164N3.3,Y_RNA	GRM5
T47D	1.31	7:82727701-83553600	DUP	825900	4	AC006322.1,AC079799.2,PCLO,SEMA3E	PCLO
T47D	1.31	7:78202901-79251300	DUP	1048400	7	MAGI2,MAGI2-AS1,MAGI2-AS2,MAGI2-AS3,MAGI2-IT1,RNU6-337P,RNU6-530P	MAGI2
T47D	1.3	10:54004701-54015700	DUP	11000	2	PRKG1,PRKG1-AS1	PRKG1
T47D	1.3	10:56382601-56469100	DUP	86500	2	PCDH15,RP11-257I14.1	PCDH15
T47D	1.3	10:53498501-53617700	DUP	119200	1	PRKG1	PRKG1
T47D	1.3	7:81776501-82628500	DUP	852000	3	AC005159.1,CACNA2D1,PCLO	PCLO
T47D	1.3	11:21505701-22658300	DUP	1152600	12	AC103801.2,ANO5,CTD-2019O4.1,CTD-2140G10.1,CTD-2140G10.2,CTD-2140G10.4,CTD-3064C13.1,FANCF,GAS2,NELL1,RP11-34N19.1,SLC17A6	FANCF
T47D	1.28	10:55462301-55906500	DUP	444200	1	PCDH15	PCDH15
T47D	1.28	10:67284501-68127100	DUP	842600	4	AC022538.1,CTNNA3,RP11-210G22.1,RP11-222A11.1	CTNNA3
T47D	1.27	15:93345505-93503917	DUP	158412	6	AC013394.2,CHD2,CTD-2313J17.1,FAM174B,MIR3175,RN7SL599P	CHD2
T47D	1.25	21:36189443-36235345	DUP	45902	1	RUNX1	RUNX1
T47D	1.25	7:82629201-82726000	DUP	96800	2	PCLO,RNA5SP235	PCLO
T47D	1.23	17:70082120-70294587	DUP	212467	3	AC007461.2,SOX9,SOX9-AS1	SOX9
T47D	0.79	2:239828041-240322700	DEL	494660	18	AC017028.1,AC017028.10,AC017028.2,AC017028.3,AC017028.4,AC017028.5,AC017028.6,AC017028.7,AC017028.8,AC017028.9,AC114788.1,AC114788.2,HDAC4,MIR2467,MIR4269,MIR4440,MIR4441,RP11-648F7.1	HDAC4
T47D	0.79	7:101288601-101987300	DEL	698700	9	AC005088.1,CTA-339C12.1,CTA-357J21.1,CTB-181H17.1,CUX1,MIR4285,SH2B2,SNORA48,Y_RNA	CUX1
T47D	0.78	20:14862345-14972532	DEL	110187	3	MACROD2,MACROD2-AS1,RP5-974N19.1	MACROD2
T47D	0.78	16:78373927-78490745	DEL	116818	1	WWOX	WWOX
T47D	0.78	12:4281201-4619200	DEL	338000	7	C12orf4,C12orf5,CCND2,CCND2-AS1,CCND2-AS2,FGF23,FGF6	CCND2,FGF23,FGF6
T47D	0.78	17:16745501-17815500	DEL	1070000	29	AC055811.1,AC104024.1,AC104024.2,COPS3,FLCN,MED9,MIR33B,MPRIP,MPRIP-AS1,NT5M,PEMT,PLD6,RAI1,RAI1-AS1,RASD1,RN7SL775P,RNU6-468P,RNU6-767P,RP1-253P7.1,RP11-416I2.1,RP11-45M22.3,RP11-45M22.5,RP11-524F11.1,RP11-524F11.2,SMCR2,SMCR5,TNFRSF13B,TOM1L2,Y_RNA	FLCN
T47D	0.78	19:57458501-59003700	DEL	1545200	91	A1BG,A1BG-AS1,AC003002.4,AC003002.6,AC003005.2,AC003006.1,AC003006.7,AC003682.16,AC004017.1,AC004076.7,AC004076.9,AC012313.1,AC020915.1,AURKC,C19orf18,CTC-444N24.11,CTC-444N24.13,CTC-444N24.6,CTC-444N24.8,CTD-2368P22.1,CTD-2583A14.10,CTD-2583A14.8,CTD-2619J13.13,CTD-2619J13.14,CTD-2619J13.16,CTD-2619J13.17,CTD-2619J13.19,CTD-2619J13.23,CTD-2619J13.3,CTD-2619J13.8,CTD-2619J13.9,CTD-3138B18.5,CTD-3…	ZNF132
T47D	0.78	19:30400901-32624200	DEL	2223300	28	AC005597.1,AC007796.1,AC008992.1,AC011456.1,AC011478.1,AC011518.1,AC011518.2,AC011525.2,AC011525.4,AC020952.1,CTC-360P9.1,CTC-360P9.2,CTC-360P9.3,CTC-360P9.4,CTC-360P9.5,CTC-400I9.1,CTC-400I9.2,CTC-400I9.3,CTC-439O9.3,CTC-448F2.4,CTC-565M22.1,CTD-2050I18.1,CTD-2050I18.2,RNA5SP471,RNU6-967P,TSHZ3,URI1,ZNF536	TSHZ3,ZNF536
T47D	0.78	7:106412001-110043000	DEL	3631000	34	AC002386.1,AC002467.7,AC004014.3,AC004492.1,AC005048.1,AC005487.2,AC007567.1,AC073071.1,BCAP29,C7orf66,CBLL1,COG5,CTA-360L10.1,CTA-363E19.2,CTB-13F3.1,DLD,DNAJB9,DUS4L,FLJ00325,GPR22,HBP1,LAMB4,NRCAM,PIK3CG,PNPLA8,PRKAR2B,RNA5SP236,RP4-593H12.1,RP5-884M6.1,SLC26A4,SLC26A4-AS1,THAP5,U3,snoU109	PIK3CG
T47D	0.77	7:110351601-110657200	DEL	305600	3	AC005161.1,AC073326.3,IMMP2L	IMMP2L
T47D	0.77	18:22613701-23065300	DEL	451600	3	CTD-2006O16.2,RP11-958F21.3,ZNF521	ZNF521
T47D	0.77	9:20135401-21537500	DEL	1402100	33	AL163193.1,AL512635.1,FOCAD,IFNA1,IFNA10,IFNA13,IFNA14,IFNA16,IFNA17,IFNA2,IFNA21,IFNA4,IFNA5,IFNA6,IFNA7,IFNA8,IFNB1,IFNE,IFNW1,KLHL9,MIR31,MIR31HG,MIR4473,MIR4474,MIR491,MLLT3,PTPLAD2,RNU4-26P,RP11-354P17.15,RP11-4E23.2,SNORA30,SNORD39,Y_RNA	MLLT3
T47D	0.77	10:130262901-132294600	DEL	2031700	13	AL355531.1,AL355531.2,EBF3,GLRX3,LINC00959,MGMT,MIR4297,RP11-109A6.2,RP11-109A6.3,RP11-168C9.1,RP11-442O18.1,RP11-442O18.2,RP11-540N6.1	MGMT
T47D	0.77	1:48848901-51384100	DEL	2535200	20	AGBL4,AGBL4-IT1,AL645730.1,AL645730.2,BEND5,DMRTA2,ELAVL4,FAF1,RNU4-61P,RNU6-1026P,RNU6-1253P,RP11-141A19.1,RP11-141A19.2,RP11-567C20.2,RP11-567C20.3,RP5-850O15.3,RP5-850O15.4,SPATA6,Y_RNA,snoU13	AGBL4,FAF1
T47D	0.77	6:158198201-161033600	DEL	2835400	52	ACAT2,AIRN,AL590703.1,AL591025.1,C6orf99,DYNLT1,EZR,EZR-AS1,FNDC1,FNDC1-IT1,GTF2H5,IGF2R,LPA,MAS1,MIR3918,MRPL18,RN7SL173P,RNU4ATAC18P,RNU6-293P,RNU6-786P,RP1-111C20.3,RP1-111C20.4,RP1-249F5.3,RP1-276N6.2,RP11-125D12.1,RP11-125D12.2,RP11-13P5.1,RP11-13P5.2,RP11-288H12.4,RP11-52J3.2,RP11-52J3.3,RP11-732M18.2,RP11-732M18.3,RP3-393E18.2,RP3-403L10.3,RSPH3,SERAC1,SLC22A1,SLC22A2,SLC22A3,SNORA20,SNORA…	IGF2R,SLC22A1,SLC22A2
T47D	0.77	7:93327101-96476900	DEL	3149800	39	AC002076.10,AC002429.5,AC002451.1,AC002451.3,AC003092.1,AC003092.2,AC004012.1,AC004458.1,AC006378.2,AC084368.1,ASB4,C7orf76,CASD1,COL1A2,DYNC1I1,GNG11,GNGT1,GS1-293C5.1,MIR4652,MIR591,PDK4,PEG10,PON1,PON2,PON3,PPP1R9A,RN7SKP129,RNU4-16P,RNU6-1328P,RNU6-364P,RNU6-532P,RNU6-956P,RNU7-188P,RP11-682N22.1,SGCE,SHFM1,SLC25A13,TFPI2,snoU13	SGCE,SLC25A13
T47D	0.77	1:5736201-12931700	DEL	7195500	99	ACOT7,AL035406.1,AL356261.1,AL356693.1,C1orf200,CA6,CAMTA1,CAMTA1-IT1,CHD5,CLSTN1,CTNNBIP1,DNAJC11,ENO1,ENO1-AS1,ENO1-IT1,ERRFI1,ESPN,GPR153,GPR157,H6PD,HES2,HES3,ICMT,KCNAB2,KIF1B,KLHL21,LINC00337,LZIC,MIR1273D,MIR34A,MIR4252,MIR4689,MIR5697,NMNAT1,NOL9,PARK7,PER3,PGD,PHF13,PIK3CD,RERE,RN7SKP269,RN7SL451P,RN7SL721P,RN7SL729P,RN7SL731P,RNA5SP40,RNU1-7P,RNU1-8P,RNU6-304P,RNU6-37P,RNU6-731P,RNU6-82…	CAMTA1,ERRFI1,PIK3CD,RPL22
T47D	0.77	22:35116401-47202400	DEL	12086000	99	AL022314.1,AL049747.1,ANKRD54,APOL1,APOL2,APOL3,APOL4,APOL5,APOL6,BAIAP2L2,BX470187.1,C1QTNF6,C22orf23,CACNG2,CDC42EP1,CITF22-24E5.1,CSF2RB,CTA-228A9.3,CTA-714B7.5,CTA-714B7.7,CTA-833B7.2,CYTH4,EIF3D,EIF3L,ELFN2,FOXRED2,GALR3,GCAT,GGA1,H1F0,HMGXB4,HMOX1,IFT27,IL2RB,ISX,KCTD17,LGALS1,LGALS2,LL22NC01-81G9.3,MAFF,MB,MCM5,MFNG,MICALL1,MIR3909,MIR4534,MIR658,MIR659,MPST,MYH9,NCF4,NOL12,PDXP,PICK1,PLA2…	IL2RB,MYH9,SOX10
T47D	0.76	20:14718432-14744938	DEL	26506	1	MACROD2	MACROD2
T47D	0.76	7:100327601-100553800	DEL	226200	9	ACHE,EPHB4,MUC3A,RN7SL549P,RN7SL750P,RP11-126L15.4,SLC12A9,TRIP6,UFSP1	EPHB4
T47D	0.76	1:71741401-71979800	DEL	238400	2	NEGR1,ZRANB2-AS2	NEGR1
T47D	0.76	20:14329738-14939516	DEL	609778	5	MACROD2,MACROD2-AS1,MACROD2-IT1,RNU6-228P,RP5-974N19.1	MACROD2
T47D	0.76	6:128067701-129226700	DEL	1159000	10	LAMA2,PTPRK,RP1-86D1.2,RP1-86D1.3,RP1-86D1.4,RP1-86D1.5,RP11-103C16.2,THEMIS,Y_RNA,snoU13	LAMA2
T47D	0.76	1:2691801-3875606	DEL	1183806	28	ACTRT2,AL691523.1,ARHGEF16,C1orf174,CCDC27,CEP104,DFFB,LINC00982,LINC01134,LRRC47,MEGF6,MIR551A,PRDM16,RN7SL574P,RP1-163G9.2,RP1-286D6.5,RP11-168F9.2,RP11-22L13.1,RP11-46F15.2,RP11-740P5.2,RP11-740P5.3,RP5-1092A11.2,RP5-1092A11.5,SMIM1,TP73,TP73-AS1,TPRG1L,WRAP73	PRDM16,TP73
T47D	0.76	6:126612901-127917200	DEL	1304300	9	C6orf58,CENPW,ECHDC1,MIR588,RNA5SP217,RNF146,RNU6-200P,RSPO3,SOGA3	RSPO3
T47D	0.76	1:75853601-77834400	DEL	1980800	24	AC096951.1,AC104458.1,ACADM,AK5,AL445464.1,ASB17,MSH4,PIGK,RABGGTB,RNU6-161P,RNU6-503P,RP11-375A5.1,RP11-415A20.1,RP11-550H2.1,RP11-550H2.2,RP4-564M11.2,RP4-682C21.5,RP5-1102E8.3,SLC44A5,SNORD45A,SNORD45B,SNORD45C,ST6GALNAC3,ST6GALNAC5	SLC44A5
T47D	0.76	2:228956501-230984100	DEL	2027600	17	AC009410.1,AC074019.1,DNER,FBXO36,FBXO36-IT1,PID1,RN7SKP283,RNU6-1027P,RNU6-613P,RNU6-624P,RNU6-964P,RNU7-9P,RNY4P19,SLC16A14,SNORD112,SPHKAP,TRIP12	TRIP12
T47D	0.76	4:71485601-74409600	DEL	2924000	31	ADAMTS3,AFM,AFP,ALB,ANKRD17,COX18,DCK,ENAM,GC,GRSF1,IGJ,MOB1B,NPFFR2,RNA5SP163,RNU4ATAC9P,RNU6-459P,RNU6-520P,RNU6-784P,RNU6-891P,RNU6ATAC5P,RP11-352E8.2,RP11-373J21.1,RP11-46J23.1,RP11-545L5.1,RP11-622A1.2,RP11-692D12.1,RUFY3,SLC4A4,SNORA3,UTP3,snoU13	ANKRD17,COX18,DCK
T47D	0.76	8:8331701-11953800	DEL	3622100	84	AC023385.1,AC087269.2,AF131215.2,AF131215.3,AF131215.4,AF131215.5,AF131215.6,AF131215.8,AF131215.9,AF131216.5,AF131216.6,BLK,C8orf12,C8orf49,C8orf74,CLDN23,CTD-2135J3.3,CTD-3023L14.1,CTD-3023L14.2,CTD-3023L14.3,DEFB130,DEFB134,DEFB135,DEFB136,ERI1,FAM167A,FDFT1,GATA4,LINC00208,LINC00529,LINC00599,MFHAS1,MIR4286,MIR4660,MIR597,MIR598,MSRA,MTMR9,NEIL2,PINX1,PPP1R3B,PRSS51,PRSS55,RN7SL178P,RN7SL293P…	GATA4
T47D	0.75	6:129230901-129320500	DEL	89600	1	LAMA2	LAMA2
T47D	0.75	6:134589701-134726000	DEL	136300	2	SGK1,Y_RNA	SGK1
T47D	0.75	2:140985401-141184100	DEL	198700	1	LRP1B	LRP1B
T47D	0.75	6:129325601-129737400	DEL	411800	1	LAMA2	LAMA2
T47D	0.75	1:1662101-2585100	DEL	923000	40	AL589739.1,AL590822.1,AL590822.2,C1orf86,CALML6,FAM213B,GABRD,GNB1,HES5,MMEL1,MORN1,NADK,PANK4,PEX10,PLCH2,PRKCZ,RER1,RP1-140A9.1,RP1-283E3.8,RP11-181G12.2,RP11-181G12.4,RP11-547D24.1,RP11-547D24.3,RP13-436F16.1,RP3-395M20.12,RP3-395M20.2,RP3-395M20.3,RP3-395M20.7,RP3-395M20.8,RP3-395M20.9,RP4-713A8.1,RP4-740C4.6,RP4-740C4.7,RP4-740C4.8,RP4-740C4.9,RP5-892K4.1,SKI,SLC35E2,TMEM52,TNFRSF14	TNFRSF14
T47D	0.75	19:8897401-10496700	DEL	1599300	64	AC008752.1,AC008752.2,AC008752.3,ANGPTL6,C19orf82,COL5A3,CTC-325H20.2,CTC-325H20.4,CTC-543D15.3,CTD-2240E14.4,CTD-2369P2.2,CTD-2369P2.4,CTD-2369P2.5,CTD-2369P2.8,CTD-2529P6.3,CTD-2529P6.4,CTD-2553C6.1,CTD-2623N2.11,CTD-2623N2.5,CTD-3116E22.7,EIF3G,FBXL12,FDX1L,ICAM1,ICAM4,ICAM5,MBD3L1,MIR4322,MIR5589,MRPL4,MUC16,OLFM2,OR1M1,OR7D2,OR7D4,OR7E24,OR7G1,OR7G2,OR7G3,P2RY11,PIN1,PPAN,PPAN-P2RY11,RAVER1,…	MRPL4,S1PR2,TYK2
T47D	0.75	6:168023041-170035500	DEL	2012460	29	AL009178.1,DACT2,FRMD1,KIF25,KIF25-AS1,MLLT4,MLLT4-AS1,RP1-125N5.2,RP1-137D17.1,RP1-137D17.2,RP1-39J2.1,RP11-351J23.1,RP11-351J23.2,RP11-417E7.1,RP11-417E7.2,RP11-503C24.1,RP11-503C24.2,RP11-503C24.3,RP11-503C24.4,RP11-503C24.6,RP3-470B24.5,RP3-495K2.1,RP3-495K2.2,RP3-495K2.3,SMOC2,THBS2,WDR27,XXyac-YX65C7_A.2,XXyac-YX65C7_A.3	MLLT4
T47D	0.75	6:165718001-167746000	DEL	2028000	34	AL590482.1,C6orf118,CCR6,FGFR1OP,GPR31,LINC00473,MIR1913,MIR3939,MPC1,PDE10A,PRR18,RNA5SP226,RNASET2,RNU6-153P,RNU6-730P,RP1-167A14.2,RP1-168L15.5,RP11-252P19.1,RP11-252P19.2,RP11-514O12.4,RP11-568A7.2,RP11-568A7.3,RP4-655C5.4,RPS6KA2,RPS6KA2-AS1,RPS6KA2-IT1,SDIM1,SFT2D1,SNORD45,T,TCP10L2,TTLL2,UNC93A,Z98049.1	FGFR1OP
T47D	0.75	6:96640501-98864900	DEL	2224400	19	FHL5,FUT9,GPR63,KLHL32,MIR2113,MMS22L,NDUFAF4,RN7SL509P,RN7SL797P,RNU4-70P,RP1-104O17.1,RP1-104O17.2,RP1-104O17.3,RP11-111D3.2,RP11-436D23.1,RP3-417O22.3,RP3-418C23.2,UFL1,UFL1-AS1	MMS22L
T47D	0.75	3:59149401-61605200	DEL	2455800	6	FHIT,NPCDR1,PTPRG,RP11-285B24.1,RP11-719N22.2,U3	FHIT
T47D	0.75	7:112726601-116530900	DEL	3804300	30	AC002066.1,AC002066.2,AC006159.3,AC006159.4,AC006159.5,AC020606.1,AC068610.3,AC068610.5,AC073130.1,AC073130.3,AC073626.2,CAPZA2,CAV1,CAV2,LINC00998,MDFIC,MET,MIR3666,PPP1R3A,RNA5SP238,RP11-458K10.1,RP11-458K10.2,RP11-458K10.3,RP11-736E3.1,SNORA25,TES,TFEC,TSRM,Y_RNA,snoZ185	MET,PPP1R3A
T47D	0.75	19:12118701-18552800	DEL	6434100	99	AC005513.1,AC005546.2,AC007787.2,AC008686.1,AC010422.1,AC020934.1,AC092069.1,ASF1B,ASNA1,BEST2,C19orf53,C19orf57,C19orf67,CACNA1A,CC2D1A,CTB-55O6.10,CTB-55O6.4,CTB-5E10.3,CTC-239J10.1,CTC-250I14.3,CTC-250I14.6,CTC-425F1.2,CTC-425F1.4,CTD-2006C1.2,CTD-2192J16.11,CTD-2192J16.21,CTD-2192J16.24,CTD-2192J16.26,CTD-2265O21.3,CTD-2265O21.7,CTD-2659N19.10,CTD-2659N19.2,CTD-2659N19.4,CTD-2659N19.9,CTD-266…	ASNA1,LYL1
T47D	0.75	9:1399863-29856028	DEL	28456165	100	AK3,AL158147.1,AL158147.2,AL161450.1,AL162419.1,AL353733.1,AL365202.1,AL589675.1,C9orf38,CD274,CDC37L1,CER1,FREM1,GLDC,GLIS3,GLIS3-AS1,IL33,INSL4,INSL6,JAK2,KCNV2,KDM4C,KIAA1432,LINC00583,LURAP1L,MIR101-2,MIR4665,MLANA,MPDZ,NFIB,PDCD1LG2,PLGRKT,PPAPDC2,PTPRD,RANBP6,RCL1,RFX3,RLN1,RLN2,RN7SL123P,RN7SL25P,RN7SL592P,RN7SL5P,RN7SL849P,RNU2-25P,RNU2-47P,RNU6-694P,RNU7-185P,RP11-109M17.2,RP11-120J1.1,R…	CD274,JAK2,KDM4C,PDCD1LG2,PTPRD,SMARCA2
T47D	0.74	2:141189701-141506500	DEL	316800	1	LRP1B	LRP1B
T47D	0.74	1:13603515-14355600	DEL	752086	13	AL359771.1,CTA-520D8.2,LRRC38,PDPN,PRAMEF14,PRAMEF15,PRAMEF17,PRAMEF19,PRAMEF20,PRDM2,RNA5SP41,RP4-597A16.2,SCARNA11	PRDM2
T47D	0.74	6:156358601-157572070	DEL	1213470	8	ARID1B,MIR4466,RP1-137K2.2,RP11-230C9.2,RP11-230C9.3,RP11-230C9.4,RP11-518I13.1,SNORD28	ARID1B
T47D	0.74	19:7382935-8690583	DEL	1307649	60	AC010323.1,AC010336.1,AC092316.1,AC092316.2,AC130469.2,ADAMTS10,ANGPTL4,ARHGEF18,C19orf45,C19orf59,CAMSAP3,CCL25,CD209,CERS4,CLEC4G,CLEC4M,CTB-133G6.1,CTB-133G6.2,CTD-2207O23.11,CTD-2207O23.3,CTD-2325M2.1,CTD-3020H12.4,CTD-3193O13.1,CTD-3193O13.11,CTD-3193O13.13,CTD-3193O13.14,CTD-3193O13.8,CTD-3193O13.9,CTD-3214H19.16,CTD-3214H19.6,CTXN1,ELAVL1,EVI5L,FBN3,FCER2,HNRNPM,KANK3,LRRC8E,MAP2K7,MARCH2,…	MAP2K7
T47D	0.74	6:113938701-115899900	DEL	1961200	16	AL136446.1,AL357519.1,HDAC2,HS3ST5,MARCKS,RNA5SP213,RNU6-475P,RP1-249H1.2,RP1-249H1.4,RP11-367G18.1,RP11-544L8__B.4,RP3-399L15.1,RP3-399L15.2,RP3-399L15.3,U3,snoU13	HDAC2
T47D	0.74	3:83855001-86434500	DEL	2579500	13	AC107025.1,AC108696.1,AC132660.1,CADM2,CADM2-AS1,CADM2-AS2,LINC00971,MIR5688,RN7SKP284,RNU6-1129P,RP11-735B13.2,RP11-789F5.1,snoZ40	CADM2
T47D	0.74	17:9525301-12353600	DEL	2828300	48	AC000003.1,AC000003.2,AC005284.1,AC005701.1,AC005725.1,ADPRM,CTC-297N7.1,CTC-297N7.10,CTC-297N7.11,CTC-297N7.5,CTC-297N7.7,CTC-297N7.8,CTC-297N7.9,DHRS7C,DNAH9,GAS7,GLP2R,LINC00675,MAP2K4,MIR744,MYH1,MYH13,MYH2,MYH4,MYH8,PIRT,RCVRN,RN7SL601P,RNU11-2P,RNU6-1065P,RP11-1096G20.5,RP11-401O9.3,RP11-401O9.4,RP11-471L13.2,RP11-477N12.3,RP11-55L4.1,RP11-55L4.2,RP11-628O18.1,RP11-680C21.1,RP11-799N11.1,RP…	GAS7,MAP2K4
T47D	0.73	20:14755367-14898411	DEL	143044	2	MACROD2,MACROD2-AS1	MACROD2
T47D	0.73	18:45192801-46223000	DEL	1030200	10	AC091150.1,CTIF,MIR4743,RNA5SP456,RNU6-708P,RNU7-191P,RP11-380M21.4,RP11-426J5.2,SMAD2,ZBTB7C	SMAD2
T47D	0.73	4:18370801-21162100	DEL	2791300	10	KCNIP4,MIR218-1,RNA5SP157,RP11-362J17.1,RP11-3J1.1,RP11-608B3.1,RP11-608O21.1,RP11-94H6.1,SLIT2,SLIT2-IT1	SLIT2
T47D	0.73	22:47335701-51237600	DEL	3901900	72	AC000036.4,AC002056.5,ADM2,AL022328.1,AL954742.1,ALG12,ARSA,CHKB,CHKB-AS1,CITF22-1A6.3,CITF22-49D8.1,CPT1B,CRELD2,CTA-280A3__B.2,CTA-299D3.8,CTA-384D8.31,CTA-384D8.33,CTA-384D8.34,CTA-384D8.35,CTA-384D8.36,DENND6B,FAM19A5,IL17REL,KLHDC7B,LINC00898,LL22NC03-121E8.3,LL22NC03-121E8.4,LL22NC03-75H12.2,LMF2,MAPK11,MAPK12,MAPK8IP2,MIOX,MIR3201,MIR3667,MIR4535,MLC1,MOV10L1,NCAPH2,PANX2,PIM3,PPP6R2,RABL2…	NCAPH2
T47D	0.73	17:12356901-16656700	DEL	4299800	76	AC002553.1,AC003664.1,AC005224.2,AC005304.1,AC005324.6,AC005324.7,AC005358.1,AC005358.3,AC005375.1,AC005703.2,AC005703.3,AC005772.2,AC005863.1,AC005863.2,AC013248.2,AC015922.6,AC022816.2,ADORA2B,ARHGAP44,CCDC144A,CDRT1,CDRT15,CDRT4,CDRT7,CDRT8,COX10,COX10-AS1,CTD-3157E16.1,FAM211A-AS1,HS3ST3A1,LINC00670,MIR1269B,MIR1288,MIR4731,MIR548H3,NCOR1,PMP22,RN7SL442P,RN7SL550P,RN7SL620P,RN7SL792P,RNA5SP43…	NCOR1
T47D	0.73	4:160727801-165272000	DEL	4544200	16	AC005150.1,AC093788.1,AC106860.1,FSTL5,MARCH1,NAF1,NPY1R,NPY5R,RN7SKP105,RP11-218F10.3,RP11-234O6.2,RP11-497K21.1,RP11-502M1.2,RP11-563E2.2,TKTL2,TMA16	FSTL5
T47D	0.73	18:39359801-44542300	DEL	5182500	35	ATP5A1,C18orf25,CTC-782O7.1,EPG5,HAUS1,KATNAL2,LINC00907,LOXHD1,MIR4319,PIAS2,PIK3C3,PSTPIP2,RIT2,RN7SKP26,RNA5SP454,RNA5SP455,RNF165,RNU6-1278P,RNU6-443P,RP11-116O18.1,RP11-116O18.3,RP11-309E23.2,RP11-456K23.1,RP11-687F6.1,RP11-742D12.2,RP11-749H17.1,RP11-749H17.2,RP11-846C15.2,SETBP1,SIGLEC15,SLC14A1,SLC14A2,ST8SIA5,SYT4,Y_RNA	PIK3C3,SETBP1
T47D	0.73	9:6700501-12854300	DEL	6153800	27	AL353733.1,KDM4C,LURAP1L,PTPRD,RN7SL5P,RN7SL849P,RNU2-47P,RNU7-185P,RP11-109M17.2,RP11-134K1.3,RP11-23D5.1,RP11-29B9.1,RP11-29B9.2,RP11-390F4.10,RP11-390F4.3,RP11-3L8.3,RP11-403H13.1,RP11-527D15.1,RP11-74C3.1,RP11-75C9.1,RP11-75C9.2,RP11-77E14.2,RP11-87N24.2,RP11-87N24.3,SNORD27,TMEM261,TYRP1	KDM4C,PTPRD
T47D	0.73	4:183705301-190058400	DEL	6353100	97	AC079080.1,AC093824.1,AC093844.1,AC108865.1,AC110771.1,AC114798.1,ACSL1,ANKRD37,CASP3,CCDC110,CDKN2AIP,CENPU,CLDN22,CLDN24,CYP4V2,ENPP6,F11,F11-AS1,FAM149A,FAT1,HELT,ING2,IRF2,KIAA1430,KLKB1,LINC01060,LINC01093,LRP2BP,MIR3945,MIR4455,MTNR1A,PDLIM3,PRIMPOL,RN7SL28P,RNU4-64P,RNU6-1053P,RNU6-1055P,RNU6-173P,RNU6-335P,RNU6-479P,RNU7-158P,RNU7-192P,RP11-11N5.1,RP11-11N5.3,RP11-138B4.1,RP11-188P17.2,RP…	CDKN2AIP,FAT1,TENM3
T47D	0.73	1:86035931-96474416	DEL	10438485	97	AC093577.1,AL139139.1,AL356270.1,AL451010.1,BARHL2,BCAR3,BRDT,BTBD8,C1orf146,CCBL2,CCDC18,CDC7,CLCA1,CLCA2,CLCA4,COL24A1,CYR61,DDAH1,DR1,EPHX4,EVI5,FAM69A,FNBP1L,GBP1,GBP3,GBP4,GBP6,GBP7,GFI1,GLMN,GTF2B,HFM1,HS2ST1,KIAA1107,LINC01140,LMO4,LRRC8B,LRRC8C,LRRC8D,MTF2,ODF2L,PKN2,RBMXL1,RN7SKP123,RN7SKP272,RN7SL235P,RN7SL583P,RN7SL653P,RN7SL692P,RN7SL824P,RNA5SP51,RNA5SP52,RNA5SP53,RNU4-59P,RNU6-125P,…	RPL5
T47D	0.73	6:155318173-170035061	DEL	14716888	100	ACAT2,AGPAT4,AIRN,AL035697.1,AL078585.1,AL590703.1,AL591025.1,ARID1B,C6orf118,C6orf99,CAHM,CLDN20,DYNLT1,EZR,EZR-AS1,FNDC1,FNDC1-IT1,GTF2H5,IGF2R,LPA,MAP3K4,MAS1,MIR1202,MIR3692,MIR3918,MIR4466,MRPL18,NOX3,PACRG,PARK2,PDE10A,PLG,RN7SL173P,RN7SL366P,RNA5SP226,RNU4ATAC18P,RNU6-293P,RNU6-730P,RNU6-786P,RNU7-152P,RP1-111C20.3,RP1-111C20.4,RP1-137K2.2,RP1-155D22.1,RP1-155D22.2,RP1-230L10.1,RP1-249F5.3…	ARID1B,IGF2R,MAP3K4,PARK2,SLC22A1,SLC22A2,TIAM2
T47D	0.72	8:37954301-38064300	DEL	110000	9	ASH2L,BAG4,KB-1836B5.4,LSM1,RP11-90P5.2,RP11-90P5.4,RP11-90P5.5,RP11-90P5.7,STAR	BAG4
T47D	0.72	2:141968698-142112142	DEL	143444	1	LRP1B	LRP1B
T47D	0.72	19:7060501-7347108	DEL	286608	5	AC010311.1,AC125387.1,CTB-25J19.9,INSR,ZNF557	INSR
T47D	0.72	6:155348301-156355700	DEL	1007400	8	CLDN20,MIR1202,NOX3,RNU7-152P,RP1-257I9.2,RP11-477D19.2,TFB1M,TIAM2	TIAM2
T47D	0.72	18:25089501-27604300	DEL	2514800	10	AC015933.2,AC090349.1,AC091321.1,AC105245.1,CDH2,CTD-2515C13.2,RNU6-408P,RP11-510D21.1,RP11-739N10.1,RP11-784B15.1	CDH2
T47D	0.72	6:91673101-94575500	DEL	2902400	11	AL359987.1,AL589947.1,CASC6,EPHA7,MIR4643,RN7SL415P,RP1-149C7.1,RP1-177I10.1,RP1-23E21.2,RP11-127B16.1,U3	EPHA7
T47D	0.72	4:44977801-47978500	DEL	3000700	22	AC092597.3,AC107068.1,ATP10D,CNGA1,COMMD8,CORIN,COX7B2,GABRA2,GABRA4,GABRB1,GABRG1,NIPAL1,RN7SKP199,RN7SKP215,RNU6-412P,RNU6-931P,RP11-121C2.2,RP11-320H14.1,RP11-362I1.1,RP11-436F23.1,RP11-731J8.2,snoU13	GABRG1
T47D	0.72	1:72361201-75843000	DEL	3481800	28	C1orf173,CRYZ,FPGT,FPGT-TNNI3K,LHX8,LRRC53,LRRIQ3,NEGR1,RN7SKP19,RNA5SP50,RNU4ATAC8P,RNU6-1246P,RNU6-622P,RP11-17E13.2,RP11-262K1.1,RP11-439H8.4,RP11-510C10.2,RP11-510C10.3,RP11-510C10.4,RP11-93N20.1,RP4-598G3.1,RP4-612J11.1,RP4-650F12.2,RP4-660H19.1,RP4-788P17.1,SLC44A5,TNNI3K,TYW3	NEGR1,SLC44A5
T47D	0.72	7:123687701-130254500	DEL	6566800	97	AC000099.1,AC000123.4,AC000124.1,AC000370.2,AC003968.1,AC005276.1,AC018635.1,AC025594.1,AC073320.1,AC073934.6,AHCYL2,ARF5,ATP6V1F,CALU,CCDC136,CEP41,CPA1,CPA2,CPA4,CPA5,FAM71F1,FAM71F2,FLNC,FSCN3,GCC1,GPR37,GRM8,HILPDA,IRF5,KLHDC10,LEP,LRRC4,MEST,MIR129-1,MIR182,MIR183,MIR592,MIR593,MIR96,NRF1,OPN1SW,PAX4,POT1-AS1,PRRT4,RBM28,RN7SL306P,RN7SL81P,RNA5SP242,RNA5SP243,RNA5SP244,RNA5SP245,RNU1-72P,RNU…	RBM28,SMO
T47D	0.72	9:21541701-32315400	DEL	10773700	55	AL157830.1,AL359922.1,AL391117.1,AL442639.1,AL590726.1,AL590726.2,C9orf53,C9orf72,CAAP1,CDKN2A,CDKN2B,CDKN2B-AS1,DMRTA1,ELAVL2,EQTN,IFNK,IFT74,IZUMO3,LINC00032,LINGO2,LRRC19,MIR31HG,MIR873,MIR876,MOB3B,MTAP,PLAA,RMRPP5,RN7SKP120,RN7SL100P,RN7SL151P,RNA5SP280,RNA5SP281,RP11-149I2.4,RP11-18A15.1,RP11-20A20.2,RP11-271O3.1,RP11-298E2.2,RP11-315I14.2,RP11-321L2.1,RP11-321L2.2,RP11-337A23.3,RP11-337A23…	CDKN2A,CDKN2B,MTAP
T47D	0.71	7:87333301-87344900	DEL	11600	2	ABCB1,RUNDC3B	ABCB1
T47D	0.71	4:59949801-62809600	DEL	2859800	11	AC095061.1,LPHN3,MIR548AG1,RNU6-1325P,RP11-16N2.1,RP11-525J21.1,RP11-593F5.2,RP11-622J8.1,RP11-725D20.1,RP11-798L4.1,Y_RNA	LPHN3
T47D	0.71	8:30547201-34415100	DEL	3867900	36	AC104037.1,DUSP26,FUT10,GSR,MAK16,NRG1,NRG1-IT1,NRG1-IT2,NRG1-IT3,PURG,RN7SL457P,RN7SL621P,RNA5SP261,RNA5SP262,RNA5SP263,RNF122,RNU6-528P,RNU6-663P,RP1-273G13.3,RP1-84O15.2,RP11-1002K11.1,RP11-11N9.4,RP11-317N12.1,RP11-363L24.3,RP11-431M3.1,RP11-431M3.2,RP11-566H8.1,RP11-566H8.2,RP11-566H8.3,RP11-722E23.2,SNORA70,SNORD13,TEX15,TTI2,UBXN8,WRN	WRN
T47D	0.71	4:63597501-68264400	DEL	4666900	14	EPHA5,MIR1269A,RNU2-40P,RNU6-191P,RNU6-699P,RP11-12K22.1,RP11-19C24.1,RP11-257A22.1,RP11-25H12.1,RP11-51P8.1,RP11-707A18.1,RP11-807H7.1,RP11-807H7.2,TECRL	EPHA5
T47D	0.71	1:97319501-104146100	DEL	6826600	69	AC093157.1,AC104457.1,AGL,AL160056.1,AL451051.1,AL592205.1,AL592205.2,CDC14A,COL11A1,DBT,DPH5,DPYD,DPYD-AS1,DPYD-AS2,DPYD-IT1,EXTL2,FRRS1,GPR88,HIAT1,LPPR4,LPPR5,LRRC39,MIR137HG,MIR553,OLFM3,PALMD,RN7SKP285,RNPC3,RNU4-75P,RNU6-1318P,RNU6-352P,RNU6-750P,RNU6-965P,RP11-153F1.1,RP11-153F1.2,RP11-157N3.1,RP11-202K23.1,RP11-272L13.3,RP11-305E17.6,RP11-347K2.1,RP11-347K2.2,RP11-411H5.1,RP11-413P11.1,RP…	DPYD
T47D	0.7	4:62811201-63592600	DEL	781400	3	AC110810.1,LPHN3,RP11-84A1.3	LPHN3
T47D	0.7	6:161067901-163260700	DEL	2192800	12	AGPAT4,AL035697.1,LPA,MAP3K4,PACRG,PARK2,PLG,RP1-81D8.3,RP11-235G24.1,RP11-235G24.3,RP3-428L16.1,RP3-428L16.2	MAP3K4,PARK2
T47D	0.7	19:18553401-22455000	DEL	3901600	100	AC002306.1,AC003973.4,AC003973.5,AC004447.2,AC005197.2,AC005253.2,AC005253.4,AC005387.2,AC005387.3,AC005932.1,AC006539.1,AC007204.1,AC007204.2,AC010329.1,AC011477.1,AC012627.1,AC078899.5,AC078899.8,AC092364.2,AC092364.4,ARMC6,CERS1,CILP2,COMP,COPE,CRLF1,CRTC1,CTB-184G21.3,CTC-260E6.6,CTC-260F20.3,CTC-513N18.6,CTC-513N18.7,CTC-559E9.4,CTC-559E9.5,CTC-559E9.6,CTC-559E9.8,CTD-2332E11.2,CTD-2542C24.8…	ELL,GMIP,MEF2B
T47D	0.7	8:13476301-18455000	DEL	4978700	41	AC021760.1,AC091559.1,ASAH1,CNOT7,CTD-2023J5.1,CTD-2547L16.1,FGF20,FGL1,MICU3,MIR383,MIR548V,MSR1,MTMR7,MTUS1,NAT1,NAT2,PCM1,PDGFRL,PSD3,RN7SL474P,RNA5SP256,RNU6-397P,RNU7-153P,RP11-13N12.1,RP11-13N12.2,RP11-156K13.1,RP11-156K13.2,RP11-156K13.3,RP11-242F4.2,RP11-326L2.1,RP11-3G21.1,RP11-468H14.2,RP11-480O10.1,RP11-77B22.2,RP11-806O11.1,SGCZ,SLC7A2,TUSC3,VPS37A,Y_RNA,ZDHHC2	PCM1,TUSC3
T47D	0.69	3:60770766-61145900	DEL	375134	2	FHIT,U3	FHIT
T47D	0.69	8:2284901-6829500	DEL	4544600	30	AC133633.1,AC133633.2,AGPAT5,ANGPT2,CSMD1,CTD-2541M15.1,CTD-2541M15.3,CTD-2541M15.4,DEFA4,DEFA6,DEFB1,GS1-24F4.2,GS1-24F4.3,GS1-57L11.1,MCPH1,MIR4659B,RN7SKP159,RN7SL318P,RN7SL872P,RNA5SP251,RP11-115C21.2,RP11-124B13.1,RP11-134O21.1,RP11-158A14.1,RP11-279L11.1,RP11-281H11.1,RP11-378A12.1,RP5-991O23.1,SNORA70,XKR5	CSMD1
T47D	0.69	13:67329301-79294400	DEL	11965100	80	AC000403.1,AL139319.1,AL162571.1,AL354720.1,AL355390.1,AL391384.1,ATXN8OS,BORA,C13orf45,CLN5,COMMD6,DACH1,DIS3,EDNRB,EDNRB-AS1,FBXL3,IRG1,KCTD12,KLF12,KLF5,KLHL1,LINC00347,LINC00348,LINC00364,LINC00381,LINC00383,LINC00392,LINC00393,LINC00401,LINC00402,LINC00446,LINC00561,LINC01034,LINC01069,LINC01078,LMO7,MIR3665,MYCBP2,MYCBP2-AS1,MYCBP2-AS2,MZT1,PCDH9,PCDH9-AS2,PCDH9-AS3,PCDH9-AS4,PIBF1,POU4F1,R…	KLF5,TBC1D4
T47D	0.67	9:9047048-9759588	DEL	712540	3	AL353733.1,PTPRD,RN7SL5P	PTPRD
T47D	0.66	4:182696101-183701700	DEL	1005600	10	AC108142.1,MIR1305,RN7SKP13,RN7SKP67,RNU2-34P,RP11-18D7.2,RP11-18D7.3,RP11-402C9.1,RP11-540E16.2,TENM3	TENM3
T47D	0.64	4:181919760-182585020	DEL	665260	2	LINC00290,RP11-665C14.2	LINC00290
T47D	0.61	4:181776558-182325363	DEL	548805	2	LINC00290,RP11-665C14.2	LINC00290
T47D	0.61	18:4792593-77712610	DEL	72920017	98	ANKRD12,AP000897.1,AP001032.1,AP001094.1,AP005118.1,AP005138.1,AP005227.1,AP005271.1,APCDD1,ARHGAP28,C18orf42,C18orf64,CTD-2124B20.2,CTD-2124B20.3,CTD-3096M3.1,CTD-3096M3.2,EPB41L3,L3MBTL4,LAMA1,LINC00526,LINC00667,LINC00668,LRRC30,MIR3976,PIEZO2,PPP4R1,PTPRM,RAB12,RAB31,RALBP1,RN7SL282P,RN7SL50P,RN7SL537P,RN7SL723P,RN7SL862P,RNA5SP449,RNA5SP450,RNU2-27P,RNU5F-3P,RNU6-349P,RNU6-903P,RNU6-916P,RP1…	ANKRD12,LAMA1
T47D	0.59	18:12328246-77710540	DEL	65382294	99	ABHD3,AC006557.1,AC036178.1,AC091038.1,AC091043.1,AFG3L2,ANKRD30B,AP001010.1,AP001525.1,AP005482.1,AP006564.1,CEP192,CTAGE1,CXADRP3,CYP4F35P,ESCO1,FAM210A,GATA6,GATA6-AS1,LDLRAD4,LDLRAD4-AS1,MC2R,MC5R,MIB1,MIR1-2,MIR3156-2,MIR320C1,MIR4526,MIR5190,PSMG2,RN7SL233P,RN7SL362P,RN7SL662P,RNA5SP451,RNMT,RNU6-1021P,RNU6-1038P,RNU6-120P,RNU6-1210P,RNU6-316P,RNU6-702P,RNU6-721P,RNU6ATAC20P,RNU7-129P,ROCK1…	GATA6,MIB1
T47D	0.58	18:13550617-77712317	DEL	64161700	97	ABHD3,AC006557.1,AC010754.1,AC036178.1,AC091038.1,AC091043.1,AC105247.1,ANKRD29,ANKRD30B,AP001010.1,AP001525.1,AP006564.1,C18orf8,CABLES1,CABYR,CTAGE1,CXADRP3,CYP4F35P,ESCO1,FAM210A,GATA6,GATA6-AS1,LAMA3,LDLRAD4,MC2R,MC5R,MIB1,MIR1-2,MIR3156-2,MIR320C1,MIR4526,MIR4741,NPC1,OSBPL1A,RBBP8,RIOK3,RN7SL233P,RN7SL362P,RN7SL662P,RN7SL745P,RNA5SP451,RNMT,RNU5A-6P,RNU6-1021P,RNU6-1032P,RNU6-1038P,RNU6-120…	CABLES1,GATA6,MIB1
T47D	0.51	16:55865401-56773000	DEL	907600	30	AC026461.1,AMFR,BBS2,CTD-2050B12.1,CTD-2050B12.2,GNAO1,MIR3935,MT1A,MT1B,MT1E,MT1F,MT1G,MT1H,MT1M,MT1X,MT2A,MT3,MT4,NUDT21,NUP93,OGFOD1,RP11-249C24.10,RP11-249C24.11,RP11-343H19.1,RP11-343H19.2,RP11-355E10.1,RP11-413H22.2,RP11-441F2.2,RP11-441F2.5,RP11-461O7.1	NUP93
T47D	0.51	2:240549601-243097600	DEL	2548000	68	AC005104.3,AC005237.4,AC011298.1,AC011298.2,AC013469.1,AC079612.2,AC093585.6,AC093642.3,AC093642.4,AC093642.6,AC093802.1,AC104809.2,AC104809.3,AC104809.4,AC104841.1,AC104841.2,AC114730.11,AC114730.2,AC114730.3,AC114730.5,AC114730.7,AC114730.8,AC124861.1,AC124861.2,AC131097.3,AC131097.4,AC133528.2,AGXT,ANKMY1,ANO7,AQP12A,ATG4B,BOK,BOK-AS1,C2orf54,CAPN10,CAPN10-AS1,D2HGDH,DTYMK,DUSP28,FARP2,GAL3ST2…	PASK
T47D	0.5	16:56774901-59499300	DEL	2724400	69	AC009052.12,AC010543.1,AC012181.1,AC040163.1,ARL2BP,C16orf80,CCDC102A,CCDC113,CCDC135,CCL17,CCL22,CETP,CIAPIN1,CNGB1,CNOT1,CPNE2,CSNK2A2,CTB-134F13.1,CTD-2600O9.1,CX3CL1,DOK4,FAM192A,GINS3,GOT2,GPR114,GPR56,GPR97,HERPUD1,KATNB1,KIFC3,MIR138-2,MMP15,NDRG4,NUP93,PLLP,POLR2C,PRSS54,RN7SL143P,RN7SL645P,RNU6-103P,RNU6-1110P,RNU6-1155P,RNU6-20P,RNU6-269P,RP11-322D14.2,RP11-325K4.2,RP11-325K4.3,RP11-405…	HERPUD1,NUP93
T47D	0.48	16:49170501-54076300	DEL	4905800	85	AC007333.1,AC007339.1,AC009166.5,AC027348.1,ADCY7,AKTIP,BRD7,C16orf78,C16orf97,CASC16,CBLN1,CHD9,CNEP1R1,CTD-2034I21.1,CTD-2034I21.2,CYLD,FTO,FTO-IT1,HEATR3,LINC00919,NKD1,NOD2,PAPD5,RBL2,RN7SKP142,RNA5SP426,RNA5SP427,RNU6-1153P,RNY4P3,RP11-142G1.1,RP11-142G1.2,RP11-142G1.3,RP11-152O14.1,RP11-152O14.4,RP11-189E14.3,RP11-189E14.4,RP11-189E14.5,RP11-21B23.1,RP11-21B23.2,RP11-21B23.3,RP11-22D3.1,RP1…	CYLD
T47D	0.47	16:63480401-67095400	DEL	3615000	48	AC012322.1,AC132186.1,BEAN1,CA7,CBFB,CCDC79,CDH11,CDH16,CDH5,CES2,CES3,CES4A,CMTM1,CMTM2,CMTM3,CTD-2258A20.5,DYNC1LI2,FAM96B,LINC00920,LINC00922,NAE1,PDP2,RN7SL543P,RNA5SP428,RP11-21L1.1,RP11-256I9.2,RP11-256I9.3,RP11-351A20.1,RP11-351A20.2,RP11-361L15.4,RP11-368L12.1,RP11-370P15.2,RP11-403P17.2,RP11-403P17.3,RP11-439I14.2,RP11-467L24.1,RP11-513N24.1,RP11-61A14.1,RP11-61A14.2,RP11-61A14.3,RP11-61…	CBFB,CDH11,CDH5,CES2
T47D	0.44	18:60579301-61530300	DEL	951000	15	BCL2,KDSR,PHLPP1,RP11-28F1.2,RP11-299P2.1,RP11-635N19.1,RP11-635N19.3,SERPINB12,SERPINB13,SERPINB3,SERPINB4,SERPINB5,SERPINB7,VPS4B,snoU13	BCL2,KDSR,SERPINB3
T47D	0.44	12:13549801-15304300	DEL	1754500	31	AC007535.1,ARHGDIB,ART4,ATF7IP,C12orf60,ERP27,GRIN2B,GUCY2C,H2AFJ,MGP,PDE6H,PLBD1,RERG,RERG-IT1,RN7SKP134,RN7SKP162,RN7SL46P,RN7SL676P,RNA5SP353,RNU6-491P,RNU6-590P,RP11-134N1.2,RP11-174G6.1,RP11-174G6.5,RP11-233G1.4,RP11-4N23.1,RP11-502N13.2,RP11-508P1.2,RP11-695J4.2,SMCO3,WBP11	ATF7IP
T47D	0.43	18:58742501-60573700	DEL	1831200	21	AC015989.1,AC015989.2,CDH20,KIAA1468,PHLPP1,PIGN,RN7SL705P,RNF152,RNU6-116P,RNU6-142P,RP11-1096D5.1,RP11-1096D5.2,RP11-173A16.1,RP11-173A16.2,RP11-640A1.3,RP11-879F14.1,RP11-879F14.2,RP11-879F14.3,TNFRSF11A,Y_RNA,ZCCHC2	CDH20,TNFRSF11A
T47D	0.43	18:52397401-57071500	DEL	4674100	75	AC090324.1,AC090340.1,AC098848.1,AC105105.1,ALPK2,ATP8B1,BOD1L2,CCDC68,CPLX4,CTD-2008L17.1,CTD-2008L17.2,CTD-2171N6.1,CTD-2526M8.2,CTD-2526M8.3,FECH,GRP,LINC-ROR,LMAN1,MALT1,MIR122,MIR4529,NARS,NEDD4L,ONECUT2,RAB27B,RAX,RN7SL112P,RNA5SP459,RNU2-69P,RNU6-219P,RNU6-737P,RNU6-742P,RP11-108P20.1,RP11-108P20.2,RP11-108P20.3,RP11-108P20.4,RP11-1151B14.2,RP11-1151B14.3,RP11-1151B14.4,RP11-126O1.2,RP11-1…	MALT1
T47D	0.43	12:8778901-13546300	DEL	4767400	100	A2M,A2M-AS1,A2ML1,A2ML1-AS1,A2ML1-AS2,AC006432.1,AC007436.1,AC007450.1,AC018630.1,AC091814.2,AC091814.3,BCL2L14,CD69,CLEC12A,CLEC1A,CLEC1B,CLEC2A,CLEC2B,CLEC7A,CLEC9A,CLECL1,DUSP16,EIF2S3L,ETV6,KLRB1,KLRC1,KLRC3,KLRC4,KLRD1,KLRF1,KLRF2,KLRG1,KLRK1,LINC00612,LINC00987,LOH12CR1,LOH12CR2,LRP6,M6PR,MANSC1,MFAP5,NKG2-E,OLR1,PHC1,PRB1,PRB2,PRB3,PRB4,PRH1,PRH2,PRR4,PZP,RN7SKP161,RNU6-1295P,RNU6-545P,RNU…	ETV6
T47D	0.42	18:46224501-47871400	DEL	1646900	33	ACAA2,C18orf32,CCDC11,CTIF,CXXC1,DYM,LIPG,MBD1,MIR1539,MIR4744,MYO5B,RN7SL310P,RNA5SP457,RNA5SP458,RP11-1030E3.1,RP11-1058N17.1,RP11-110H1.4,RP11-110H1.8,RP11-110H1.9,RP11-15F12.1,RP11-15F12.3,RP11-30L3.2,RP11-484L8.1,RP11-813F20.2,RP11-813F20.4,RPL17-C18orf32,SCARNA17,SCARNA18,SMAD7,SNORD58A,SNORD58B,SNORD58C,Y_RNA	MYO5B
T47D	0.38	18:47875701-49267700	DEL	1392000	12	AC105227.1,ELAC1,MAPK4,ME2,MEX3C,RN7SL695P,RNU1-46P,RP11-267C16.1,SKA1,SMAD4,Y_RNA,snoU13	SMAD4
T47D	0.19	18:9205225-9206931	DEL	1706	2	ANKRD12,RP11-21J18.1	ANKRD12

## Sheet: 5B
Table S5B: List of copy number alterations identified in the cell line models
SAMPLE	RatioToAverageCoverage	LOCATION	SVTYPE	SVLEN	NumofGenes	GENES	CandidateGene
SKBR3	9.87	8:123604401-124001800	DUP	397400	9	AC016405.2,LINC01151,RP11-44N11.1,RP11-44N11.2,RP11-44N11.3,RP11-557C18.4,RP11-973F15.2,ZHX2,snoU13	ZHX2
SKBR3	9.69	8:117974072-124159675	DUP	6185603	55	AC011626.1,AC016405.2,AC022909.1,AC023590.1,AC027238.1,COLEC10,DEPTOR,DERL1,DSCC1,ENPP2,EXT1,HAS2,HAS2-AS1,KB-1471A8.1,LINC01151,MAL2,MED30,NOV,RN7SKP153,RN7SL228P,RN7SL396P,RN7SL826P,RNA5SP277,RNU6-12P,RNY4P5,RP11-278I4.2,RP11-369K17.1,RP11-398G24.2,RP11-3G20.1,RP11-3G20.2,RP11-44N11.1,RP11-44N11.2,RP11-44N11.3,RP11-4K16.2,RP11-557C18.3,RP11-557C18.4,RP11-654G14.1,RP11-713M15.1,RP11-713M15.2,RP1…	EXT1,NOV,ZHX2
SKBR3	9.63	8:128329601-128763400	DUP	433800	5	CASC11,CASC8,MYC,POU5F1B,RP11-382A18.2	MYC
SKBR3	9.62	17:37277001-38006300	DUP	729300	25	AC005288.1,AC087491.2,ARL5C,CACNB1,CDK12,CTB-131K11.1,ERBB2,FBXL20,GRB7,IKZF3,MED1,MIR4728,PGAP3,PLXDC1,PNMT,PPP1R1B,RNU6-233P,RNU6-981P,RP11-690G19.3,RP11-94L15.2,RP5-906A24.2,RPL19,STAC2,STARD3,TCAP	CDK12,ERBB2,GRB7,IKZF3
SKBR3	9.52	8:71230401-71386400	DUP	156000	4	Metazoa_SRP,NCOA2,RP11-333A23.4,Y_RNA	NCOA2
SKBR3	9.16	8:124002701-124761900	DUP	759200	23	ANXA13,C8orf76,CTD-2552K11.2,DERL1,FAM83A,FAM83A-AS1,FBXO32,KLHL38,MIR4663,MIR548D1,RN7SKP155,RNU6-628P,RNU6-875P,RNY4P5,RP11-174I12.2,RP11-539E17.5,RP11-557C18.3,TBC1D31,U3,WDYHV1,ZHX1,ZHX1-C8ORF76,snoU13	FAM83A
SKBR3	8	8:119434615-121478670	DUP	2044055	19	COLEC10,DEPTOR,DSCC1,ENPP2,KB-1471A8.1,MAL2,NOV,RN7SKP153,RN7SL396P,RNA5SP277,RNU6-12P,RP11-278I4.2,RP11-4K16.2,RP11-760H22.2,RP11-775B15.2,SAMD12,SNORA32,TAF2,TNFRSF11B	NOV
SKBR3	7.75	8:119643301-120666200	DUP	1022900	10	COLEC10,ENPP2,MAL2,NOV,RNU6-12P,RP11-278I4.2,RP11-4K16.2,RP11-775B15.2,SNORA32,TNFRSF11B	NOV
SKBR3	7.38	8:79600101-81802500	DUP	2202400	29	AC009941.1,HEY1,IL7,MIR5708,MRPS28,RN7SL107P,RN7SL308P,RN7SL41P,RNU11-6P,RNU2-71P,RNU6-1213P,RNU7-85P,RP11-1114I9.1,RP11-26J3.1,RP11-26J3.3,RP11-27N21.3,RP11-48B3.3,RP11-48B3.4,RP11-79H23.3,RP11-92K15.1,RP11-92K15.3,RP11-941H19.3,SNORA20,STMN2,TPD52,Y_RNA,ZBTB10,ZC2HC1A,ZNF704	HEY1,MRPS28
SKBR3	7.31	8:117049738-129096819	DUP	12047081	100	AARD,AC011626.1,AC016405.2,AC022909.1,AC023590.1,AC027238.1,AC103863.1,AF130343.1,ANXA13,C8orf76,COLEC10,CTD-2552K11.2,DEPTOR,DERL1,DSCC1,EIF3H,ENPP2,EXT1,FAM83A,FAM83A-AS1,FAM91A1,FBXO32,FER1L6,FER1L6-AS1,FER1L6-AS2,HAS2,HAS2-AS1,KB-1471A8.1,KLHL38,LINC00536,LINC01151,MAL2,MED30,MIR3610,MIR4663,MIR548D1,MTSS1,NDUFB9,NOV,RAD21,RAD21-AS1,RN7SKP153,RN7SKP155,RN7SL228P,RN7SL396P,RN7SL826P,RNA5SP277,…	EXT1,FAM83A,NOV,RAD21,ZHX2
SKBR3	6.94	8:112543001-114314400	DUP	1771400	7	AC024996.1,CSMD3,MIR2053,RNU4-37P,RP11-1101K5.1,RP11-58O3.2,snoU13	CSMD3
SKBR3	6.65	8:116683596-120980687	DUP	4297091	38	AARD,AC023590.1,AC103863.1,AF130343.1,COLEC10,DEPTOR,DSCC1,EIF3H,ENPP2,EXT1,KB-1471A8.1,LINC00536,MAL2,MED30,MIR3610,NOV,RAD21,RAD21-AS1,RN7SKP153,RN7SL228P,RN7SL396P,RN7SL826P,RNA5SP276,RNA5SP277,RNU6-12P,RP11-278I4.2,RP11-4K16.2,RP11-536K17.1,RP11-654G14.1,RP11-775B15.2,SAMD12,SLC30A8,SNORA31,SNORA32,TAF2,TNFRSF11B,TRPS1,UTP23	EXT1,NOV,RAD21
SKBR3	6.2	8:118110401-118980900	DUP	870500	6	EXT1,MED30,RN7SL826P,RP11-654G14.1,SLC30A8,SNORA31	EXT1
SKBR3	6.12	8:118981101-119642900	DUP	661800	3	AC023590.1,EXT1,SAMD12	EXT1
SKBR3	6	8:114095025-114516643	DUP	421618	2	AC107890.1,CSMD3	CSMD3
SKBR3	5.82	17:38007301-38377900	DUP	370600	17	AC068669.1,CSF3,GSDMA,IKZF3,LRRC3C,MED24,MSL1,NR1D1,ORMDL3,PSMD3,RAPGEFL1,RP11-387H17.4,RP11-387H17.6,SNORD124,THRA,WIPF2,ZPBP2	IKZF3
SKBR3	5.54	8:90468701-91006400	DUP	537700	5	NBN,OSGIN2,RIPK2,RNU6-925P,RP11-37B2.1	NBN
SKBR3	5.42	8:72667760-81802495	DUP	9134735	99	AC009941.1,AC016194.1,AC104012.1,AC105242.1,CASC9,CRISPLD1,CTD-2320G14.2,GDAP1,HEY1,HNF4G,IL7,JPH1,KCNB2,LINC01109,LINC01111,LY96,MIR5681A,MIR5708,MRPS28,MSC,Metazoa_SRP,PEX2,PI15,PKIA,RDH10,RN7SL107P,RN7SL308P,RN7SL41P,RNA5SP271,RNU11-6P,RNU2-54P,RNU2-71P,RNU6-1197P,RNU6-1213P,RNU6-1220P,RNU6-1300P,RNU6-285P,RNU7-85P,RP1-16A9.1,RP11-1114I9.1,RP11-1145L24.1,RP11-115I9.1,RP11-142A23.1,RP11-26J3.1,…	HEY1,KCNB2,MRPS28
SKBR3	4.81	8:117217501-118109700	DUP	892200	11	AARD,AF130343.1,EIF3H,LINC00536,MIR3610,RAD21,RAD21-AS1,RN7SL228P,RP11-536K17.1,SLC30A8,UTP23	RAD21
SKBR3	4.6	8:114314601-114920600	DUP	606000	3	AC107890.1,CSMD3,RP11-67H2.1	CSMD3
SKBR3	4.53	8:72795101-73949000	DUP	1153900	11	KCNB2,RNA5SP271,RNU6-285P,RP11-1145L24.1,RP11-142A23.1,RP11-313C15.1,RP11-351E7.1,RP11-383H13.1,RP11-531A24.3,TERF1,TRPA1	KCNB2
SKBR3	4.3	20:51338501-52484900	DUP	1146400	16	AC005808.3,AC006076.1,AL050316.1,AL354993.1,RN7SKP184,RNU7-14P,RP11-15M15.1,RP11-15M15.2,RP11-80K6.2,RP4-669H2.1,RP4-678D15.1,RP4-724E16.2,RP5-823G15.5,TSHZ2,Y_RNA,ZNF217	TSHZ2,ZNF217
SKBR3	4.2	8:123843646-127862110	DUP	4018464	75	AC016405.2,AC090573.1,ANXA13,C8orf76,CTD-2552K11.2,DERL1,FAM83A,FAM83A-AS1,FAM84B,FAM91A1,FBXO32,FER1L6,FER1L6-AS1,FER1L6-AS2,KIAA0196-AS1,KLHL38,LINC00861,LINC00964,MIR4662A,MIR4663,MIR548D1,MTSS1,NDUFB9,NSMCE2,PCAT1,RN7SKP155,RN7SL329P,RN7SL590P,RNF139,RNF139-AS1,RNU11-4P,RNU6-442P,RNU6-628P,RNU6-756P,RNU6-869P,RNU6-875P,RNY4P5,RP11-103H7.1,RP11-103H7.2,RP11-103H7.3,RP11-103H7.5,RP11-1082L8.2,R…	FAM83A,ZHX2
SKBR3	4.18	20:51105858-53331738	DUP	2225880	25	AC005220.3,AC005808.3,AC006076.1,AL050316.1,AL354993.1,BCAS1,CYP24A1,DOK5,MIR4756,PFDN4,RN7SKP184,RNU7-14P,RP11-15M15.1,RP11-15M15.2,RP11-80K6.2,RP4-669H2.1,RP4-678D15.1,RP4-715N11.2,RP4-723E3.1,RP4-724E16.2,RP5-1022J11.2,RP5-823G15.5,TSHZ2,Y_RNA,ZNF217	TSHZ2,ZNF217
SKBR3	4	8:125591785-128937647	DUP	3345862	42	AC090573.1,CASC11,CASC19,CASC8,CCAT1,FAM84B,KIAA0196-AS1,LINC00861,LINC00964,MIR4662A,MTSS1,MYC,NSMCE2,PCAT1,PCAT2,POU5F1B,PVT1,RN7SL329P,RN7SL590P,RNU11-4P,RNU6-442P,RNU6-869P,RP11-103H7.1,RP11-103H7.2,RP11-103H7.3,RP11-103H7.5,RP11-1082L8.2,RP11-1082L8.3,RP11-1082L8.4,RP11-136O12.2,RP11-351C8.1,RP11-382A18.2,RP11-532M24.1,RP11-550A5.2,RP11-622O11.4,RP11-65D17.1,RP11-697B24.1,RP11-6D1.3,RP11-89K…	MYC
SKBR3	3.92	8:75493581-89594886	DUP	14101305	100	AC009941.1,AC016194.1,AC103816.1,AC105242.1,C8orf59,CA1,CA13,CA2,CA3,CASC9,CHMP4C,CRISPLD1,CTD-2272D18.1,E2F5,FABP4,FABP5,FABP9,HEY1,HNF4G,IL7,IMPA1,LINC01109,LINC01111,LRRCC1,MIR5708,MRPS28,PAG1,PEX2,PI15,PKIA,PMP2,RALYL,REXO1L11P,REXO1L1P,RN7SL107P,RN7SL308P,RN7SL41P,RNU11-6P,RNU2-54P,RNU2-71P,RNU6-1040P,RNU6-1213P,RNU6-1220P,RNU7-85P,RP11-1114I9.1,RP11-1149M10.1,RP11-1149M10.2,RP11-115I9.1,RP1…	FABP5,HEY1,MRPS28,PAG1
SKBR3	3.7	8:75032928-124761925	DUP	49728997	99	AC009941.1,AC016194.1,AC103816.1,AC105242.1,C8orf59,CA1,CA13,CASC9,CHMP4C,CRISPLD1,CTD-2272D18.1,CTD-2320G14.2,E2F5,FABP4,FABP5,FABP9,GDAP1,HEY1,HNF4G,IL7,IMPA1,JPH1,LINC01109,LINC01111,LRRCC1,MIR5681A,MIR5708,MRPS28,PAG1,PEX2,PI15,PKIA,PMP2,RALYL,RN7SL107P,RN7SL308P,RN7SL41P,RNU11-6P,RNU2-54P,RNU2-71P,RNU6-1040P,RNU6-1213P,RNU6-1220P,RNU7-85P,RP1-16A9.1,RP11-1114I9.1,RP11-1149M10.1,RP11-1149M10.…	FABP5,HEY1,MRPS28,PAG1
SKBR3	3.7	8:88415876-126645902	DUP	38230026	100	AB015752.3,AC016885.1,AC023632.1,AC091096.1,AC105081.1,AC116154.1,AC117834.1,AF070718.1,AF121898.3,C8orf37,C8orf87,C8orf88,CCNE2,CDH17,CTB-118P15.2,CTD-2006H14.2,CTD-3239E11.2,DCAF4L2,DPY19L4,ESRP1,FAM92A1,GDF6,GEM,GS1-251I9.2,GS1-251I9.3,GS1-251I9.4,GS1-5L10.1,INTS8,KB-1043D8.6,KB-1043D8.8,KB-1047C11.1,KB-1047C11.2,KB-1184D12.1,KB-1608C10.2,KIAA1429,LINC00534,LINC00535,LINC01030,LRRC69,MIR3150A,…	NBN,RUNX1T1,TP53INP1
SKBR3	3.67	8:86572379-125476434	DUP	38904055	100	AB015752.3,AC013751.1,AC016885.1,AC023632.1,AC091096.1,AC105081.1,AC117834.1,AF070718.1,AF121898.3,ATP6V0D2,C8orf87,C8orf88,CCNE2,CDH17,CNGB3,CPNE3,CTA-392E5.1,CTB-118P15.2,CTD-2006H14.2,CTD-2284J15.1,CTD-3118D11.2,CTD-3118D11.3,CTD-3239E11.2,DCAF4L2,DPY19L4,ESRP1,FAM92A1,GEM,GS1-251I9.2,GS1-251I9.3,GS1-251I9.4,GS1-5L10.1,INTS8,KB-1184D12.1,KB-1608C10.2,KIAA1429,LINC00534,LINC00535,LINC01030,LRRC…	NBN,RUNX1T1,TP53INP1
SKBR3	3.66	8:88904798-126580904	DUP	37676106	99	AB015752.3,AC016885.1,AC023632.1,AC091096.1,AC105081.1,AC116154.1,AC117834.1,AF070718.1,C8orf37,C8orf87,C8orf88,CCNE2,CDH17,CTB-118P15.2,CTD-2006H14.2,CTD-3239E11.2,DPY19L4,ESRP1,FAM92A1,GDF6,GEM,GS1-251I9.2,GS1-251I9.3,GS1-251I9.4,GS1-5L10.1,INTS8,KB-1043D8.6,KB-1043D8.8,KB-1047C11.1,KB-1047C11.2,KB-1184D12.1,KB-1608C10.2,KIAA1429,LINC00534,LINC00535,LINC01030,LRRC69,MIR3150A,MIR378D2,MIR4661,MM…	NBN,RUNX1T1,TP53INP1
SKBR3	3.56	8:79612254-91010894	DUP	11398640	99	AC009941.1,AC013751.1,AC103816.1,AF121898.3,ATP6V0D2,C8orf59,CA1,CA13,CA2,CA3,CHMP4C,CNGB3,CPNE3,CTA-392E5.1,CTB-118P15.2,CTD-2272D18.1,CTD-2284J15.1,CTD-3118D11.2,CTD-3118D11.3,DCAF4L2,E2F5,FABP4,FABP5,FABP9,HEY1,IL7,IMPA1,LRRCC1,MIR5708,MMP16,MRPS28,NBN,OSGIN2,PAG1,PMP2,PSKH2,RALYL,REXO1L10P,REXO1L11P,REXO1L1P,RIPK2,RMDN1,RN7SL107P,RN7SL308P,RN7SL41P,RNA5SP272,RNU11-6P,RNU2-71P,RNU6-1040P,RNU6-…	FABP5,HEY1,MRPS28,NBN,PAG1
SKBR3	3.53	20:54857001-55766800	DUP	909800	23	AL117380.1,AL117380.2,AL121914.1,AL133232.1,AURKA,BMP7,CASS4,FAM209A,FAM209B,FAM210B,GCNT7,RN7SL170P,RNU6-1146P,RNU6-929P,RP11-380D15.3,RP11-560A15.3,RP11-560A15.4,RP5-843L14.1,RP5-897D18.1,RTFDC1,TFAP2C,U3,snoU13	AURKA
SKBR3	3.44	8:81424743-126617344	DUP	45192601	100	AB015752.3,AC013751.1,AC103816.1,AF070718.1,AF121898.3,ATP6V0D2,C8orf59,C8orf88,CA1,CA13,CA2,CA3,CHMP4C,CNGB3,CPNE3,CTA-392E5.1,CTB-118P15.2,CTD-2272D18.1,CTD-2284J15.1,CTD-3118D11.2,CTD-3118D11.3,DCAF4L2,E2F5,FABP4,FABP5,FABP9,GS1-251I9.2,GS1-251I9.3,GS1-251I9.4,GS1-5L10.1,IMPA1,LINC00534,LINC01030,LRRC69,LRRCC1,MIR4661,MMP16,NBN,NECAB1,OSGIN2,OTUD6B,PAG1,PMP2,PSKH2,RALYL,REXO1L10P,REXO1L11P,REX…	FABP5,NBN,PAG1,RUNX1T1
SKBR3	3.43	20:57268301-57466400	DUP	198100	10	GNAS,GNAS-AS1,MIR296,MIR298,NPEPL1,RP1-309F20.3,RP1-309F20.4,RP11-261P9.4,RP4-806M20.3,RP4-806M20.5	GNAS
SKBR3	3.39	20:48659755-56618014	DUP	7958259	99	AC005220.3,AC005808.3,AC006076.1,ADNP,AL034553.1,AL035457.1,AL050316.1,AL079339.1,AL117380.1,AL117380.2,AL121914.1,AL133228.1,AL133232.1,AL354993.1,ATP9A,AURKA,BCAS1,BCAS4,BMP7,CASS4,CBLN4,CEBPB,CYP24A1,DOK5,DPM1,FAM209A,FAM209B,FAM210B,FAM65C,GCNT7,KCNG1,MC3R,MIR1302-5,MIR3194,MIR4325,MIR4756,MIR645,MOCS3,NFATC2,PARD6B,PFDN4,PTPN1,RAE1,RN7SKP184,RN7SL170P,RN7SL603P,RN7SL636P,RN7SL672P,RNA5SP487,…	ADNP,AURKA,TSHZ2,ZNF217
SKBR3	3.34	8:88415876-122968473	DUP	34552597	100	AB015752.3,AC016885.1,AC023632.1,AC091096.1,AC105081.1,AC116154.1,AC117834.1,AF070718.1,AF121898.3,C8orf37,C8orf87,C8orf88,CCNE2,CDH17,CTB-118P15.2,CTD-2006H14.2,CTD-3239E11.2,DCAF4L2,DPY19L4,ESRP1,FAM92A1,GDF6,GEM,GS1-251I9.2,GS1-251I9.3,GS1-251I9.4,GS1-5L10.1,INTS8,KB-1043D8.6,KB-1043D8.8,KB-1047C11.1,KB-1047C11.2,KB-1184D12.1,KB-1608C10.2,KIAA1429,LINC00534,LINC00535,LINC01030,LRRC69,MIR3150A,…	NBN,RUNX1T1,TP53INP1
SKBR3	3.21	7:127672701-128583700	DUP	911000	33	AC018635.1,AC025594.1,ATP6V1F,CALU,CCDC136,FAM71F1,FAM71F2,FLNC,HILPDA,IRF5,LEP,MIR129-1,MIR593,OPN1SW,PRRT4,RBM28,RN7SL81P,RNA5SP242,RNA5SP243,RNU6-177P,RNU7-27P,RNU7-54P,RP11-155G14.6,RP11-212P7.2,RP11-212P7.3,RP11-274B21.10,RP11-274B21.8,RP11-274B21.9,RP11-309L24.2,RP11-309L24.4,RP11-309L24.9,RP11-62J1.4,SND1	RBM28
SKBR3	3.18	8:78068749-88744596	DUP	10675847	95	AC009941.1,AC013751.1,AC103816.1,AC105242.1,AF121898.3,ATP6V0D2,C8orf59,CA1,CA13,CA2,CA3,CHMP4C,CNGB3,CPNE3,CTA-392E5.1,CTD-2272D18.1,CTD-2284J15.1,CTD-3118D11.2,CTD-3118D11.3,E2F5,FABP4,FABP5,FABP9,HEY1,IL7,IMPA1,LRRCC1,MIR5708,MRPS28,PAG1,PKIA,PMP2,PSKH2,RALYL,REXO1L10P,REXO1L11P,REXO1L1P,RMDN1,RN7SL107P,RN7SL308P,RN7SL41P,RNU11-6P,RNU2-71P,RNU6-1040P,RNU6-1213P,RNU6-1220P,RNU7-85P,RP11-1114I9.…	FABP5,HEY1,MRPS28,PAG1
SKBR3	3.15	17:38378401-39205800	DUP	827400	38	AC004231.2,AC073508.1,CCR7,CDC6,CTD-2267D19.2,CTD-2267D19.3,CTD-2267D19.6,GJD3,IGFBP4,KRT10,KRT12,KRT20,KRT23,KRT24,KRT25,KRT26,KRT27,KRT28,KRT39,KRTAP1-1,KRTAP1-3,KRTAP1-4,KRTAP1-5,KRTAP2-1,KRTAP3-1,KRTAP3-2,KRTAP3-3,RARA,RNA5SP441,RNY4P8,RP11-605F20.1,RP5-1028K7.2,RP5-1110E20.1,SMARCE1,TMEM99,TOP2A,WIPF2,Y_RNA	CDC6,RARA,SMARCE1,TOP2A
SKBR3	3.07	3:37948501-38201700	DUP	253200	6	ACAA1,CTDSPL,MIR26A1,MYD88,VILL,Y_RNA	MYD88
SKBR3	3.05	3:37979113-38340260	DUP	361147	9	ACAA1,CTDSPL,MIR26A1,MYD88,OXSR1,SLC22A13,SLC22A14,VILL,Y_RNA	MYD88
SKBR3	3.04	20:46023502-52298227	DUP	6274725	99	ADNP,AL021394.1,AL034553.1,AL035106.1,AL035457.1,AL050316.1,AL079339.1,AL118525.1,AL133228.1,AL354993.1,ARFGEF2,ATP9A,B4GALT5,BCAS4,CEBPB,CSE1L,CTD-2653D5.1,DDX27,DPM1,FAM65C,KCNB1,KCNG1,LINC00494,MIR1302-5,MIR3194,MIR645,MOCS3,NCOA3,NFATC2,PARD6B,PTGIS,PTPN1,RN7SKP184,RN7SL197P,RN7SL603P,RN7SL636P,RN7SL672P,RNA5SP486,RNF114,RNU6-147P,RNU6-347P,RNU6-497P,RNU6-563P,RNU6-919P,RNU7-144P,RNU7-173P,RN…	ADNP,NCOA3,TSHZ2,ZNF217
SKBR3	3.03	7:115103501-116593300	DUP	1489800	22	AC002066.1,AC002066.2,AC006159.3,AC006159.4,AC006159.5,AC073130.1,AC073130.3,CAPZA2,CAV1,CAV2,MET,RNA5SP239,RP11-458K10.1,RP11-458K10.2,RP11-458K10.3,SNORA25,ST7,ST7-AS1,TES,TFEC,Y_RNA,snoZ185	MET
SKBR3	2.76	7:113684401-113911500	DUP	227100	1	PPP1R3A	PPP1R3A
SKBR3	2.74	3:151072001-151571800	DUP	499800	9	AADAC,AC069067.1,IGSF10,MED12L,MIR5186,P2RY12,RP11-454C18.1,RP11-454C18.2,RP11-64D22.5	MED12L
SKBR3	2.68	17:39432101-40572200	DUP	1140100	57	AC003104.1,AC003958.2,AC019349.5,AC107993.1,ACLY,CNP,CTD-2132N18.2,CTD-2132N18.4,DNAJC7,FKBP10,GAST,GHDC,HAP1,HCRT,HSPB9,JUP,KAT2A,KCNH4,KLHL10,KLHL11,KRT13,KRT14,KRT15,KRT16,KRT17,KRT19,KRT31,KRT32,KRT33A,KRT33B,KRT34,KRT35,KRT36,KRT37,KRT38,KRT9,KRTAP16-1,KRTAP17-1,KRTAP29-1,KRTAP9-7,LEPREL4,LINC00974,NKIRAS2,NT5C3B,PTRF,RAB5C,RN7SL399P,RN7SL871P,RNA5SP442,RNU2-32P,RP11-156E6.1,RP11-358B23.1,RP…	STAT3,STAT5A,STAT5B
SKBR3	2.68	20:49392601-49784000	DUP	391400	9	ADNP,AL034553.1,AL133228.1,BCAS4,DPM1,KCNG1,MOCS3,RP5-914P20.5,RP5-955M13.4	ADNP
SKBR3	2.65	8:88622821-120381215	DUP	31758394	100	AB015752.3,AC016885.1,AC023632.1,AC091096.1,AC105081.1,AC116154.1,AC117834.1,AF070718.1,AF121898.3,C8orf37,C8orf87,C8orf88,CCNE2,CDH17,CTB-118P15.2,CTD-2006H14.2,CTD-3239E11.2,DCAF4L2,DPY19L4,ESRP1,FAM92A1,GDF6,GEM,GS1-251I9.2,GS1-251I9.3,GS1-251I9.4,GS1-5L10.1,INTS8,KB-1043D8.6,KB-1043D8.8,KB-1047C11.1,KB-1047C11.2,KB-1184D12.1,KB-1608C10.2,KIAA1429,LINC00534,LINC00535,LINC01030,LRRC69,MIR3150A,…	NBN,RUNX1T1,TP53INP1
SKBR3	2.65	20:34947101-36752000	DUP	1804900	32	AL132768.1,BLCAP,C20orf24,CTNNBL1,DLGAP4,DSN1,GHRH,LINC00489,MANBAL,MROH8,MYL9,NDRG3,NNAT,RBL1,RN7SKP185,RN7SL156P,RN7SL237P,RP4-640H8.2,RP5-977B1.11,RP5-977B1.7,RPN2,RPRD1B,SAMHD1,SLA2,SOGA1,SRC,TGIF2,TGIF2-C20orf24,TLDC2,TTI1,VSTM2L,Y_RNA	SRC
SKBR3	2.55	20:46019401-46414100	DUP	394700	7	AL021394.1,CTD-2653D5.1,NCOA3,RNU6-497P,RNU6-563P,RP1-148H17.1,SULF2	NCOA3
SKBR3	2.54	20:32954462-37597982	DUP	4643520	95	AAR2,ACSS2,AL121753.1,AL121895.1,AL132768.1,BLCAP,BPI,C20orf173,C20orf24,CEP250,CNBD2,CPNE1,CTD-2308N23.2,CTNNBL1,DLGAP4,DSN1,DYNLRB1,EDEM2,EPB41L1,ERGIC3,FAM83C,FAM83C-AS1,GDF5,GDF5OS,GGT7,GHRH,GSS,ITCH,ITCH-AS1,ITCH-IT1,KIAA1755,LBP,LINC00489,LINC00657,MANBAL,MAP1LC3A,MIR1289-1,MIR499A,MIR644A,MMP24,MMP24-AS1,MROH8,MYH7B,MYL9,NCOA6,NDRG3,NFS1,NNAT,PHF20,PIGU,PROCR,RBL1,RBM12,RN7SKP185,RN7SKP271…	SRC
SKBR3	2.5	8:89618499-120529245	DUP	30910746	99	AB015752.3,AC016885.1,AC023632.1,AC091096.1,AC105081.1,AC116154.1,AC117834.1,AF070718.1,C8orf37,C8orf87,C8orf88,CCNE2,CDH17,CTD-2006H14.2,CTD-3239E11.2,DPY19L4,ESRP1,FAM92A1,GDF6,GEM,GS1-251I9.2,GS1-251I9.3,GS1-251I9.4,GS1-5L10.1,INTS8,KB-1043D8.6,KB-1043D8.8,KB-1047C11.1,KB-1047C11.2,KB-1184D12.1,KB-1448A5.1,KB-1608C10.2,KIAA1429,LINC00534,LINC00535,LINC01030,LRRC69,MIR3150A,MIR378D2,MIR4661,MTE…	NBN,RUNX1T1,TP53INP1
SKBR3	2.5	20:33093529-36492646	DUP	3399117	80	AAR2,ACSS2,AL121753.1,AL121895.1,AL132768.1,BLCAP,C20orf173,C20orf24,CEP250,CNBD2,CPNE1,CTNNBL1,DLGAP4,DSN1,DYNLRB1,EDEM2,EPB41L1,ERGIC3,FAM83C,FAM83C-AS1,GDF5,GDF5OS,GGT7,GHRH,GSS,ITCH,LINC00489,LINC00657,MANBAL,MAP1LC3A,MIR1289-1,MIR499A,MMP24,MMP24-AS1,MROH8,MYH7B,MYL9,NCOA6,NDRG3,NFS1,NNAT,PHF20,PIGU,PROCR,RBL1,RBM12,RN7SKP271,RN7SL156P,RNA5SP483,RNU4-40P,RNU6-1166P,RNU6-407P,RNU6-759P,RNU6-9…	SRC
SKBR3	2.47	20:33692260-53717050	DUP	20024790	97	AAR2,ACTR5,AL121588.1,AL121753.1,AL121895.1,AL132768.1,ARHGAP40,BLCAP,BPI,C20orf173,C20orf24,CEP250,CNBD2,CPNE1,CTD-2308N23.2,CTNNBL1,DHX35,DLGAP4,DSN1,EDEM2,EPB41L1,ERGIC3,FAM83C,FAM83C-AS1,FAM83D,GDF5,GDF5OS,GHRH,KIAA1755,LBP,LINC00489,LINC00657,MANBAL,MIR1289-1,MIR548O2,MMP24,MMP24-AS1,MROH8,MYL9,NDRG3,NFS1,NNAT,PHF20,PPP1R16B,PROCR,RALGAPB,RBL1,RBM12,RN7SKP173,RN7SKP185,RN7SKP271,RN7SL116P,RN…	SRC
SKBR3	2.44	8:88680424-118922865	DUP	30242441	100	AB015752.3,AC016885.1,AC023632.1,AC091096.1,AC105081.1,AC116154.1,AC117834.1,AF070718.1,AF121898.3,C8orf37,C8orf87,C8orf88,CCNE2,CDH17,CTB-118P15.2,CTD-2006H14.2,CTD-3239E11.2,DCAF4L2,DPY19L4,ESRP1,FAM92A1,GDF6,GEM,GS1-251I9.2,GS1-251I9.3,GS1-251I9.4,GS1-5L10.1,INTS8,KB-1043D8.6,KB-1043D8.8,KB-1047C11.1,KB-1047C11.2,KB-1184D12.1,KB-1608C10.2,KIAA1429,LINC00534,LINC00535,LINC01030,LRRC69,MIR3150A,…	NBN,RUNX1T1,TP53INP1
SKBR3	2.41	8:81845783-90632341	DUP	8786558	66	AC013751.1,AC103816.1,AF121898.3,ATP6V0D2,C8orf59,CA1,CA13,CA2,CA3,CHMP4C,CNGB3,CPNE3,CTA-392E5.1,CTB-118P15.2,CTD-2272D18.1,CTD-2284J15.1,CTD-3118D11.2,CTD-3118D11.3,DCAF4L2,E2F5,FABP4,FABP5,FABP9,IMPA1,LRRCC1,MMP16,PAG1,PMP2,PSKH2,RALYL,REXO1L10P,REXO1L11P,REXO1L1P,RMDN1,RNA5SP272,RNU6-1040P,RP11-1149M10.1,RP11-1149M10.2,RP11-120I21.2,RP11-157I4.4,RP11-172E10.1,RP11-219B4.3,RP11-219B4.5,RP11-21…	FABP5,PAG1
SKBR3	2.41	20:33757816-35996601	DUP	2238785	61	AAR2,AL121753.1,AL121895.1,AL132768.1,C20orf173,C20orf24,CEP250,CNBD2,CPNE1,DLGAP4,DSN1,EDEM2,EPB41L1,ERGIC3,FAM83C,FAM83C-AS1,GDF5,GDF5OS,GHRH,LINC00657,MANBAL,MIR1289-1,MMP24,MMP24-AS1,MROH8,MYL9,NDRG3,NFS1,PHF20,PROCR,RBL1,RBM12,RN7SKP271,RN7SL156P,RNA5SP483,RNU4-40P,RNU6-1166P,RNU6-759P,RNU6-937P,ROMO1,RP11-234K24.3,RP3-477O4.14,RP3-477O4.16,RP4-550H1.4,RP4-550H1.5,RP4-614O4.11,RP4-614O4.12,R…	SRC
SKBR3	2.39	17:65521201-66067400	DUP	546200	12	AC006534.1,AC006534.2,BPTF,C17orf58,CTD-2653B5.1,KPNA2,NOL11,PITPNC1,RN7SL622P,RP11-855A2.3,RP11-855A2.5,SNORA38B	BPTF
SKBR3	2.36	20:36012289-52420878	DUP	16408589	98	ACTR5,AL009050.1,AL121588.1,AL132772.1,ARHGAP40,BLCAP,BPI,C20orf62,CHD6,CTD-2308N23.2,CTNNBL1,DHX35,EMILIN3,FAM83D,FITM2,GDAP1L1,GTSF1L,HNF4A,HNF4A-AS1,IFT52,JPH2,KIAA1755,L3MBTL1,LBP,LINC00489,LPIN3,MAFB,MIR3646,MIR548O2,MYBL2,NNAT,OSER1,OSER1-AS1,PLCG1,PPP1R16B,PTPRT,R3HDML,RALGAPB,RN7SKP100,RN7SKP173,RN7SKP185,RN7SL116P,RN7SL194P,RN7SL237P,RN7SL443P,RN7SL615P,RN7SL666P,RN7SL680P,RNA5SP484,RNU2…	CHD6,MAFB,PLCG1,SRC,TOP1
SKBR3	2.34	17:77610401-78461900	DUP	851500	28	AC100791.2,CARD14,CBX2,CBX4,CBX8,CCDC40,CTD-2047H16.2,CTD-2047H16.4,CTD-2116F7.1,CTD-2526A2.2,CTD-2529O21.1,CTD-2529O21.2,EIF4A3,ENPP7,GAA,MIR4730,MIR4739,RNF213,RP11-334C17.5,RP11-353N14.1,RP11-353N14.2,RP11-353N14.3,RP11-353N14.4,RP11-353N14.5,SGSH,SLC26A11,TBC1D16,snoU13	CBX8,RNF213
SKBR3	2.29	3:38203901-38613200	DUP	409300	9	ACVR2B,ACVR2B-AS1,OXSR1,RNU6-235P,SCN5A,SLC22A13,SLC22A14,XYLB,Y_RNA	SCN5A
SKBR3	2.28	17:66068901-66593500	DUP	524600	13	AC079210.1,AC145343.2,AMZ2,ARSG,FAM20A,MIR635,PRKAR1A,RP11-118B18.1,RP11-120M18.2,RP11-120M18.5,RP11-147L13.2,RP11-147L13.8,SLC16A6	PRKAR1A
SKBR3	2.24	8:81154451-88661848	DUP	7507397	71	AC013751.1,AC103816.1,AF121898.3,ATP6V0D2,C8orf59,CA1,CA13,CA2,CA3,CHMP4C,CNGB3,CPNE3,CTA-392E5.1,CTD-2272D18.1,CTD-2284J15.1,CTD-3118D11.2,CTD-3118D11.3,E2F5,FABP4,FABP5,FABP9,IMPA1,LRRCC1,PAG1,PMP2,PSKH2,RALYL,REXO1L10P,REXO1L11P,REXO1L1P,RMDN1,RN7SL107P,RN7SL308P,RNU11-6P,RNU2-71P,RNU6-1040P,RNU6-1213P,RP11-1149M10.1,RP11-1149M10.2,RP11-120I21.2,RP11-157I4.4,RP11-172E10.1,RP11-219B4.3,RP11-219…	FABP5,PAG1
SKBR3	2.23	1:156241410-156242776	DUP	1366	1	SMG5	SMG5
SKBR3	2.21	14:92024601-92485800	DUP	461200	6	AL133373.1,FBLN5,RP11-747H7.3,TC2N,TRIP11,U3	TRIP11
SKBR3	2.21	17:26783501-27661600	DUP	878100	48	AC010761.10,AC010761.13,AC010761.14,AC010761.6,AC010761.8,AC010761.9,AC024619.2,ALDOC,CRYBA1,DHRS13,ERAL1,FAM222B,FLOT2,FOXN1,KIAA0100,MIR451B,MYO18A,NEK8,NUFIP2,PHF12,PIPOX,PROCA1,RAB34,RP11-192H23.5,RP11-192H23.6,RP11-192H23.7,RP11-192H23.8,RP11-20B24.4,RP11-20B24.5,RP11-20B24.6,RP11-20B24.7,RP11-321A17.4,RP11-321A17.5,RPL23A,SDF2,SEZ6,SLC13A2,SNORD42A,SNORD42B,SNORD4A,SNORD4B,SPAG5-AS1,SUPT6H,…	ERAL1,MYO18A,PHF12
SKBR3	2.19	20:43308501-45283900	DUP	1975400	71	ACOT8,AL031663.1,AL031663.2,CD40,CDH22,DBNDD2,DNTTIP1,ELMO2,EPPIN,EPPIN-WFDC6,KCNK15,KCNS1,MATN4,MIR3617,MMP9,NCOA5,NEURL2,OCSTAMP,PABPC1L,PCIF1,PI3,PIGT,PLTP,RBPJL,RIMS4,RN7SL31P,RNA5SP485,RNU6ATAC38P,RP11-445H22.3,RP11-445H22.4,RP11-465L10.10,RP3-337O18.9,RP3-461P17.10,RP3-461P17.9,RP5-998H6.2,SDC4,SEMG1,SEMG2,SLC12A5,SLC13A3,SLC35C2,SLPI,SNX21,SPATA25,SPINT3,SPINT4,STK4,STK4-AS1,SYS1,TNNC2,TOM…	YWHAB
SKBR3	2.18	20:33823531-49254422	DUP	15430891	97	AAR2,ACTR5,AL121588.1,AL121895.1,AL132768.1,ARHGAP40,BLCAP,BPI,C20orf173,C20orf24,CEP250,CNBD2,CPNE1,CTD-2308N23.2,CTNNBL1,DHX35,DLGAP4,DSN1,EDEM2,EPB41L1,ERGIC3,FAM83C,FAM83C-AS1,FAM83D,GDF5,GDF5OS,GHRH,KIAA1755,LBP,LINC00489,LINC00657,MANBAL,MIR1289-1,MIR548O2,MMP24,MMP24-AS1,MROH8,MYL9,NDRG3,NFS1,NNAT,PHF20,PPP1R16B,RALGAPB,RBL1,RBM12,RN7SKP173,RN7SKP185,RN7SKP271,RN7SL116P,RN7SL156P,RN7SL194P…	SRC
SKBR3	2.15	20:33200590-48393416	DUP	15192826	97	AAR2,ACSS2,AL121753.1,AL121895.1,AL132768.1,ARHGAP40,BLCAP,BPI,C20orf173,C20orf24,CEP250,CNBD2,CPNE1,CTD-2308N23.2,CTNNBL1,DLGAP4,DSN1,EDEM2,EPB41L1,ERGIC3,FAM83C,FAM83C-AS1,GDF5,GDF5OS,GGT7,GHRH,GSS,KIAA1755,LBP,LINC00489,LINC00657,MANBAL,MIR1289-1,MIR499A,MIR548O2,MMP24,MMP24-AS1,MROH8,MYH7B,MYL9,NCOA6,NDRG3,NFS1,NNAT,PHF20,PIGU,PROCR,RALGAPB,RBL1,RBM12,RN7SKP185,RN7SKP271,RN7SL156P,RN7SL237P,R…	SRC
SKBR3	2.14	X:52568101-53053000	DUP	484900	9	FAM156A,FAM156B,RNA5SP504,SPANXN5,SSX2,SSX2B,SSX7,XAGE3,XAGE5	SSX2
SKBR3	2.12	X:39623101-40821300	DUP	1198200	12	AC092198.1,ATP6AP2,BCOR,CXorf38,MED14,MED14-AS1,MIR1587,RN7SL732P,RNU7-164P,RP11-320G24.1,Y_RNA,snoU13	BCOR
SKBR3	2.08	X:53103901-53775600	DUP	671700	19	AL139396.1,GPR173,HSD17B10,HUWE1,IQSEC2,KDM5C,KDM5C-IT1,LINC01155,MIR98,MIRLET7F2,RIBC1,RNU7-37P,RP11-236P24.3,RP11-258C19.7,RP3-339A18.6,SMC1A,VTRNA3-1P,Y_RNA,Z97054.1	KDM5C,SMC1A
SKBR3	2.06	X:15042201-16395000	DUP	1352800	19	AC073597.1,AC078993.1,ACE2,AP1S2,ASB11,ASB9,BMX,CA5B,FIGF,GRPR,GS1-594A7.3,MAGEB17,PIGA,PIR,RNU5F-7P,RP11-431J24.2,SNORA7,TMEM27,ZRSR2	ZRSR2
SKBR3	2.06	X:68725601-71391000	DUP	2665400	56	5S_rRNA,ACRC,AL590763.1,AL590764.1,ARR3,AWAT1,AWAT2,BX119917.1,BX276092.1,CXCR3,CXorf49,CXorf49B,DGAT2L6,DLG3,DLG3-AS1,EDA,FAM155B,FOXO4,GDPD2,GJB1,IGBP1,IGBP1-AS1,IGBP1-AS2,ITGB1BP2,KIF4A,MED12,MIR676,NHSL2,NLGN3,NONO,OGT,OTUD6A,P2RY4,PDZD11,RAB41,RGAG4,RN7SL581P,RN7SL746P,RNA5SP507,RNU1-56P,RNU4-81P,RNU6-1078P,RNY4P23,RP11-402P6.11,RP11-402P6.7,RP11-402P6.9,RP13-57D9.3,RP5-1091N2.9,SLC7A3,SNX12…	FOXO4,MED12,TAF1,ZMYM3
SKBR3	2.04	X:19687501-20317600	DUP	630100	10	CXorf23,EIF1AX,EIF1AX-AS1,MAP7D2,MIR23C,RPS6KA3,SH3KBP1,Y_RNA,snoU2-30,snoU2_19	EIF1AX
SKBR3	2.04	X:46863701-48724700	DUP	1861000	58	AC115618.1,AF196970.3,AF196972.9,ARAF,CDK16,CXorf24,EBP,ELK1,ERAS,FTSJ1,GATA1,GLOD5,HDAC6,INE1,JADE3,MIR4769,NDUFB11,PCSK1N,PORCN,RBM10,RBM3,RGN,RN7SL785P,RNA5SP503,RNU12-2P,RNU6-1056P,RNU6-1189P,RNU6-149P,RNU6-29P,RNU6-707P,RP11-1148L6.5,RP11-344N17.8,RP11-571E6.3,SLC38A5,SNORA11C,SPACA5,SPACA5B,SSX1,SSX3,SSX4,SSX4B,SSX5,SUV39H1,SYN1,TBC1D25,TIMP1,UBA1,USP11,UXT,UXT-AS1,WAS,WDR13,ZNF157,ZNF182,Z…	ARAF,GATA1,RBM10,SSX1,SSX4,WAS
SKBR3	2.04	X:64874201-65256400	DUP	382200	4	MIR223,MSN,RP6-159A1.3,VSIG4	MSN
SKBR3	2.03	X:22919101-25228900	DUP	2309800	31	AC004552.1,AC004655.1,AC004656.1,AC004673.1,AC096509.1,AC112778.1,AC131011.1,ACOT9,APOO,ARX,CXorf58,DDX53,EIF2S3,GS1-358P8.4,KLHL15,PCYT1B,PCYT1B-AS1,PDK3,POLA1,PRDX4,PTCHD1,RN7SL91P,RP11-40F8.2,RP13-314C10.5,SAT1,SCARNA23,SNORA68,Y_RNA,ZFX,ZFX-AS1,snoU13	POLA1
SKBR3	2.03	X:66890601-67545400	DUP	654800	4	AR,OPHN1,RNU6-1225P,RP6-201G10.2	AR
SKBR3	2.02	X:51018701-52103200	DUP	1084500	14	CXorf67,GSPT2,MAGED1,MAGED4,NUDT10,NUDT11,RNU6-504P,RP11-114H20.1,RP11-348F1.2,RP11-348F1.3,RP11-363G10.2,RP11-56H2.2,SNORA11D,SNORA11E	MAGED1
SKBR3	2.01	X:63041501-64669900	DUP	1628400	6	AL445523.1,AMER1,ASB12,MTMR8,RN7SL799P,ZC4H2	AMER1
SKBR3	2.01	X:66635901-66889900	DUP	254000	1	AR	AR
SKBR3	2	10:76554001-77450500	DUP	896500	20	AL392111.1,C10orf11,COMTD1,DUPD1,DUSP13,KAT6B,MIR606,RP11-222G7.2,RP11-310J24.3,RP11-399K21.10,RP11-399K21.11,RP11-399K21.13,RP11-399K21.14,RP11-77G23.2,RP11-77G23.5,SAMD8,VDAC2,ZNF503,ZNF503-AS1,ZNF503-AS2	KAT6B,VDAC2
SKBR3	2	X:64670801-64867900	DUP	197100	3	LAS1L,MSN,ZC3H12B	MSN
SKBR3	1.99	X:40822801-41299600	DUP	476800	7	DDX3X,RN7SL15P,RNA5SP502,RP5-1172N10.2,RP5-1172N10.4,USP9X,Y_RNA	DDX3X,USP9X
SKBR3	1.98	X:14420501-15039800	DUP	619300	4	AC003658.1,FANCB,GLRA2,MOSPD2	FANCB
SKBR3	1.97	20:15712401-16208200	DUP	495800	1	MACROD2	MACROD2
SKBR3	1.96	20:10131001-11378300	DUP	1247300	15	AL023913.1,C20orf187,JAG1,MKKS,RP1-278O22.1,RP1-278O22.2,RP11-103J8.1,RP11-103J8.2,RP11-416N4.1,RP11-416N4.4,RP4-697P8.3,RP4-734C18.1,SLX4IP,SNAP25,SNAP25-AS1	JAG1
SKBR3	1.96	X:30887401-32270500	DUP	1383100	5	DMD,FTHL17,RNA5SP501,RNU6-894P,TAB3	DMD
SKBR3	1.95	3:186313601-186581000	DUP	267400	18	ADIPOQ,ADIPOQ-AS1,AHSG,EIF4A2,FETUB,HRG,KNG1,RFC4,RNU6-1105P,RP11-134F2.2,RP11-573D15.2,RP11-573D15.3,RP11-573D15.8,RP11-573D15.9,SNORA4,SNORA63,SNORA81,SNORD2	EIF4A2
SKBR3	1.95	3:188503501-189157900	DUP	654400	4	LPP,TPRG1,TPRG1-AS1,TPRG1-AS2	LPP
SKBR3	1.93	3:184472301-185171500	DUP	699200	8	C3orf70,EHHADH,EHHADH-AS1,MAP3K13,MIR5588,RP11-329B9.1,VPS8,snoU13	MAP3K13
SKBR3	1.93	3:188604215-190967313	DUP	2363098	19	AC067718.1,CLDN1,CLDN16,IL1RAP,LEPREL1,LEPREL1-AS1,LPP,MIR944,OSTN,OSTN-AS1,RN7SKP296,RN7SL486P,RNU6-1109P,RP11-268E23.2,RP11-95L3.2,TMEM207,TPRG1,TPRG1-AS1,TPRG1-AS2	LPP
SKBR3	1.92	3:38614701-38918500	DUP	303800	5	AC116038.2,RP11-134J21.1,SCN10A,SCN11A,SCN5A	SCN5A
SKBR3	1.92	20:22064801-23470600	DUP	1405800	26	AL096677.1,AL158175.1,CD93,CST11,CSTL1,FOXA2,GZF1,LINC00261,LINC00656,NAPB,NXT1,RNA5SP478,RNA5SP479,RP11-359G22.2,RP3-322G13.5,RP3-322G13.7,RP4-737E23.2,RP4-753D10.3,RP4-753D10.5,RP4-788L20.3,RP5-1004I9.1,RP5-1097P24.1,RP5-828K20.2,SSTR4,THBD,Y_RNA	FOXA2
SKBR3	1.91	3:185173801-185866500	DUP	692700	11	C3orf65,DGKG,ETV5,ETV5-AS1,IGF2BP2,LIPH,MAP3K13,MIR548AQ,RN7SL637P,SENP2,TRA2B	ETV5,MAP3K13
SKBR3	1.9	20:9544680-48330176	DUP	38785496	99	AL023913.1,AL035045.1,AL050321.1,AL109754.1,AL117333.1,AL118509.1,AL121584.1,AL121893.1,ANKEF1,BANF2,BFSP1,BTBD3,C20orf187,CSRP2BP,DSTN,DTD1,DZANK1,ESF1,FLRT3,ISM1,ISM1-AS1,JAG1,KIF16B,LINC00493,LINC00687,LINC00851,MACROD2,MACROD2-AS1,MACROD2-IT1,MGME1,MIR3192,MKKS,NDUFAF5,OTOR,OVOL2,PAK7,PCSK2,PET117,POLR3F,RBBP9,RN7SKP111,RN7SKP69,RN7SKP74,RN7SL14P,RN7SL638P,RN7SL864P,RNA5SP475,RNA5SP476,RNU1-1…	JAG1,MACROD2
SKBR3	1.9	X:32271301-32353300	DUP	82000	1	DMD	DMD
SKBR3	1.89	7:50410601-50860500	DUP	449900	6	AC018705.5,DDC,FIGNL1,GRB10,IKZF1,RNU6-1091P	IKZF1
SKBR3	1.89	X:44865201-44995600	DUP	130400	1	KDM6A	KDM6A
SKBR3	1.89	X:76792701-77085500	DUP	292800	2	ATRX,MAGT1	ATRX
SKBR3	1.88	7:22356301-22771500	DUP	415200	9	AC002480.2,AC002480.3,AC002480.4,AC002480.5,AC073072.5,AC099759.1,IL6,RAPGEF5,STEAP1B	IL6
SKBR3	1.88	10:79851801-81092200	DUP	1240400	10	AC074323.1,LINC00595,LINC00856,RP11-31E13.2,RP11-481G8.2,RP11-90J7.2,RP11-90J7.4,SNORA71,ZMIZ1,ZMIZ1-AS1	ZMIZ1
SKBR3	1.87	3:183303324-187051869	DUP	3748545	85	ABCC5,ABCC5-AS1,ABCF3,AC131160.1,ADIPOQ,ADIPOQ-AS1,AHSG,AP2M1,C3orf65,C3orf70,CAMK2N2,CLCN2,CRYGS,DGKG,DNAJB11,DVL3,ECE2,EHHADH,EHHADH-AS1,EIF2B5-AS1,EIF2B5-IT1,EIF4A2,EIF4G1,EPHB3,ETV5,ETV5-AS1,FAM131A,FETUB,HRG,HTR3C,HTR3D,HTR3E,HTR3E-AS1,IGF2BP2,KLHL24,KNG1,LIPH,MAGEF1,MAP3K13,MAP6D1,MASP1,MIR1224,MIR4448,MIR548AQ,MIR5588,PARL,POLR2H,PSMD2,RFC4,RN7SL637P,RNU6-1105P,RP11-134F2.2,RP11-208N14.4,R…	EIF4A2,EPHB3,ETV5,MAP3K13,PSMD2
SKBR3	1.87	X:32354401-32885600	DUP	531200	5	DMD,DMD-AS3,MIR3915,MIR548F5,snoU13	DMD
SKBR3	1.86	3:187145801-187732900	DUP	587100	11	BCL6,RP11-132N15.1,RP11-132N15.2,RP11-132N15.3,RP11-211G3.2,RP11-211G3.3,RP11-30O15.1,RP11-44H4.1,RP11-567G11.1,RTP2,SST	BCL6
SKBR3	1.86	7:30432901-31898500	DUP	1465600	20	AC004691.5,AC005154.6,AC006377.1,AC006380.1,AC006380.3,ADCYAP1R1,AQP1,CCDC129,CRHR2,FAM188B,GARS,GHRHR,GS1-114I9.1,INMT,NEUROD6,NOD1,PDE1C,PPP1R17,RP4-777O23.1,RP4-777O23.2	NOD1
SKBR3	1.86	7:50344501-50370600	DUP	26100	1	IKZF1	IKZF1
SKBR3	1.86	7:54465301-55746700	DUP	1281400	14	EGFR,EGFR-AS1,GS1-18A18.1,GS1-18A18.2,LANCL2,RNU6-1125P,RP11-310H4.1,RP11-310H4.2,RP11-310H4.3,RP11-745C15.2,SEC61G,SNORA73,VOPP1,VSTM2A	EGFR
SKBR3	1.86	20:57467001-58876000	DUP	1409000	21	AL035250.1,ATP5E,C20orf197,CDH26,CTSZ,EDN3,FAM217B,GNAS,NELFCD,PHACTR3,PPP1R3D,RNU7-141P,RP11-164D18.2,RP4-614C15.2,RP4-614C15.3,RP4-719C8.1,RP5-1043L13.1,SLMO2,SYCP2,TUBB1,ZNF831	GNAS
SKBR3	1.85	7:25253701-26323200	DUP	1069500	14	AC003090.1,AC003985.1,AC004520.1,AC091705.1,AC091705.2,CBX3,CTB-119C2.1,CTD-2227E11.1,HNRNPA2B1,MIR148A,NFE2L3,NPVF,RP5-978I12.1,U3	NFE2L3
SKBR3	1.85	7:98180601-98660500	DUP	479900	8	AC004893.11,MIR3609,NPTX2,RNU6-393P,SMURF1,TMEM130,TRRAP,snoU13	SMURF1,TRRAP
SKBR3	1.84	7:2559901-2819600	DUP	259700	8	AMZ1,BRAT1,GNA12,IQCE,LFNG,MIR4648,TTYH3,snoU13	GNA12,LFNG
SKBR3	1.84	7:29802201-30095700	DUP	293500	6	AC007285.6,FKBP14,PLEKHA8,SCRN1,WIPF3,snoU13	PLEKHA8
SKBR3	1.84	7:30096601-30432100	DUP	335500	8	AC007036.4,AC007036.5,AC007036.6,AC007285.7,MIR550A1,MTURN,PLEKHA8,ZNRF2	PLEKHA8
SKBR3	1.84	20:43067101-43305800	DUP	238700	8	ADA,C20orf62,PKIG,RP11-445H22.3,RP5-1013A22.2,SERINC3,TTPAL,Z97053.1	ADA
SKBR3	1.83	3:169489201-170936400	DUP	1447200	33	CLDN11,EIF5A2,GPR160,LRRC31,LRRC34,LRRIQ4,MIR569,MYNN,PHC3,PRKCI,RNU1-70P,RNU4-38P,RNU6-315P,RNY5P3,RP11-362K14.5,RP11-362K14.6,RP11-362K14.7,RP11-373E16.3,RP11-373E16.4,RP11-379K17.12,RP11-379K17.4,RP11-469J4.3,RP11-543D10.2,RP11-816J6.3,RPL22L1,SAMD7,SEC62,SEC62-AS1,SKIL,SLC2A2,SLC7A14,TNIK,Y_RNA	EIF5A2,PRKCI
SKBR3	1.83	7:4722201-4818100	DUP	95900	3	AP5Z1,FOXK1,snoU13	FOXK1
SKBR3	1.83	7:98661301-99894800	DUP	1233500	51	AC005020.1,AC005071.1,AC069294.1,AC073063.1,AC073842.19,ARPC1B,ATP5J2,ATP5J2-PTCD1,AZGP1,BUD31,C7orf43,CNPY4,COPS6,CPSF4,CYP3A4,CYP3A43,CYP3A5,FAM200A,GAL3ST4,GATS,GJC3,GPC2,GS1-259H13.10,GS1-259H13.2,KPNA7,LAMTOR4,MBLAC1,MIR106B,MIR25,MIR4658,MIR93,OR2AE1,PDAP1,PTCD1,PVRIG,RP11-506M12.1,RP11-757A13.1,RP4-604G5.1,SMURF1,SNORA40,STAG3,TRIM4,Y_RNA,ZKSCAN1,ZKSCAN5,ZNF3,ZNF394,ZNF655,ZNF789,ZSCAN21,s…	CYP3A4,CYP3A5,SMURF1
SKBR3	1.83	20:14108023-45898464	DUP	31790441	100	AL035045.1,AL049647.1,AL050321.1,AL118509.1,AL121584.1,AL121761.1,AL121761.2,AL121893.1,AL136090.1,AL139429.1,BANF2,BFSP1,C20orf26,C20orf78,CRNKL1,CSRP2BP,DSTN,DTD1,DZANK1,FLRT3,INSM1,KIF16B,LINC00237,LINC00493,LINC00652,LINC00851,MACROD2,MACROD2-AS1,MACROD2-IT1,MGME1,MIR3192,NAA20,NKX2-2,NKX2-2-AS1,NKX2-4,OTOR,OVOL2,PAX1,PCSK2,PET117,PLK1S1,POLR3F,RALGAPA2,RBBP9,RIN2,RN7SKP140,RN7SKP69,RN7SKP74,…	MACROD2
SKBR3	1.83	20:35982191-45039422	DUP	9057231	98	ACTR5,AL009050.1,AL121588.1,AL132772.1,ARHGAP40,BLCAP,BPI,C20orf62,CHD6,CTD-2308N23.2,CTNNBL1,DHX35,EMILIN3,FAM83D,FITM2,GDAP1L1,GTSF1L,HNF4A,HNF4A-AS1,IFT52,JPH2,KIAA1755,L3MBTL1,LBP,LINC00489,LPIN3,MAFB,MIR3646,MIR548O2,MYBL2,NNAT,OSER1,OSER1-AS1,PLCG1,PPP1R16B,PTPRT,R3HDML,RALGAPB,RN7SKP100,RN7SKP173,RN7SKP185,RN7SL116P,RN7SL194P,RN7SL237P,RN7SL443P,RN7SL615P,RN7SL666P,RN7SL680P,RNA5SP484,RNU2…	CHD6,MAFB,PLCG1,SRC,TOP1
SKBR3	1.82	7:1313701-2030900	DUP	717200	17	AC074389.1,AC074389.5,AC074389.6,AC074389.7,AC074389.9,AC102953.4,AC102953.6,AC110781.3,ELFN1,INTS1,MAD1L1,MAFK,MIR4655,PSMG3,PSMG3-AS1,RP11-1246C19.1,TMEM184A	MAD1L1
SKBR3	1.82	7:2031701-2559200	DUP	527500	10	AC004840.8,AC004840.9,CHST12,EIF3B,FTSJ2,GRIFIN,LFNG,MAD1L1,NUDT1,SNX8	LFNG,MAD1L1
SKBR3	1.82	7:2819801-3340800	DUP	521000	8	AC004906.3,AC024028.1,AC073316.1,AC073316.2,AC091801.1,CARD11,GNA12,RN7SKP130	CARD11,GNA12
SKBR3	1.82	7:104474401-104727200	DUP	252800	8	KMT2E,KMT2E-AS1,LHFPL3,LINC01004,RN7SL8P,RP11-325F22.2,RP11-325F22.5,SNORD112	KMT2E
SKBR3	1.81	7:27639301-28574300	DUP	935000	8	AC004549.6,CREB5,HIBADH,JAZF1,JAZF1-AS1,RN7SL365P,RNU6-979P,TAX1BP1	JAZF1
SKBR3	1.81	7:72849101-73002400	DUP	153300	4	BAZ1B,FZD9,RNU6-1198P,TBL2	FZD9
SKBR3	1.81	7:73005001-73549800	DUP	544800	16	CLDN3,CLDN4,CTB-51J22.1,DNAJC30,ELN,LIMK1,LINC00035,MIR4284,MLXIPL,RN7SL265P,RP11-731K22.1,STX1A,VPS37D,WBSCR22,WBSCR27,WBSCR28	ELN
SKBR3	1.81	17:67207701-68814000	DUP	1606300	17	ABCA10,ABCA5,AC002539.1,AC002539.2,AC003051.1,AC004562.1,CTD-2378E21.1,KCNJ16,KCNJ2,KCNJ2-AS1,LINC01028,MAP2K6,RP1-193H18.2,RP1-193H18.3,RP11-238F2.1,SNORA40,Y_RNA	MAP2K6
SKBR3	1.8	3:36921701-37183400	DUP	261700	10	EPM2AIP1,LRRFIP2,MLH1,RNU6-1301P,RNU6ATAC4P,RP11-129K12.1,RP11-129K12.3,RP11-129K12.4,TRANK1,Y_RNA	MLH1
SKBR3	1.8	3:169055701-169487900	DUP	432200	7	ACTRT3,MECOM,RNU6-637P,RP11-3K16.2,RP11-641D5.2,RP11-816J6.3,TERC	MECOM,TERC
SKBR3	1.8	7:5489601-5980500	DUP	490900	12	AC006483.1,AC092171.4,ACTB,CTB-161C1.1,FSCN1,MIR589,OCM,RN7SL556P,RNF216,RNF216-IT1,RSPH10B,snoU13	ACTB
SKBR3	1.8	7:5980801-6408700	DUP	427900	14	AC004895.1,AC004895.4,AIMP2,ANKRD61,CYTH3,EIF2AK1,FAM220A,PMS2,RN7SL851P,RNU6-218P,RSPH10B,SNORA42,USP42,Y_RNA	EIF2AK1,PMS2
SKBR3	1.8	7:6409401-6652600	DUP	243200	7	AC079742.4,C7orf26,FLJ20306,GRID2IP,KDELR2,RAC1,ZDHHC4	RAC1
SKBR3	1.8	7:27170001-27239200	DUP	69200	20	HOTTIP,HOXA-AS2,HOXA-AS3,HOXA10,HOXA10-AS,HOXA11,HOXA11-AS,HOXA13,HOXA3,HOXA4,HOXA5,HOXA6,HOXA7,HOXA9,MIR196B,RP1-170O19.14,RP1-170O19.20,RP1-170O19.21,RP1-170O19.22,RP1-170O19.23	HOXA11,HOXA13,HOXA3,HOXA9
SKBR3	1.79	7:65680401-67195200	DUP	1514800	25	AC006480.1,AC008267.1,AC073089.1,GS1-124K5.11,GS1-124K5.3,GS1-124K5.4,KCTD7,LINC00174,MIR4650-1,RN7SL43P,RNU6-1254P,RNU6-313P,RNU6-96P,RP11-166O4.5,RP11-166O4.6,RP11-458F8.4,RP11-792A8.4,RP4-736H5.3,RP4-756H11.3,SBDS,TMEM248,TPST1,TYW1,Y_RNA,snoU13	SBDS
SKBR3	1.79	7:74956001-75895200	DUP	939200	16	AC006014.1,CCL24,CCL26,HIP1,MDH2,MIR4651,POR,RHBDD2,RN7SL642P,RNU6-863P,SNORA14A,SRRM3,STYXL1,TRIM73,Y_RNA,snoU13	HIP1
SKBR3	1.78	3:184280701-184471100	DUP	190400	5	EPHB3,MAGEF1,RP11-329B9.3,RP11-329B9.4,RP11-329B9.5	EPHB3
SKBR3	1.78	5:149031401-151456400	DUP	2425000	53	AC010441.1,AC034205.1,ANXA6,ARSI,ATOX1,CAMK2A,CCDC69,CD74,CDX1,CTB-113P19.1,CTB-113P19.3,CTB-113P19.4,CTB-113P19.5,CTB-12O2.1,CTB-140J7.2,CTB-17P3.4,CTC-251D13.1,CTC-345K18.2,CTC-367J11.1,DCTN4,FAT2,G3BP1,GLRA1,GM2A,GPX3,HMGXB3,IRGM,MIR378A,MYOZ3,NDST1,PDE6A,PDGFRB,PPARGC1B,RN7SKP232,RN7SL868P,RNA5SP197,RNA5SP198,RPS14,SLC26A2,SLC36A1,SLC36A2,SLC36A3,SLC6A7,SMIM3,SPARC,SYNPO,TCOF1,TIGD6,TNIP1,U3,…	PDGFRB,RPS14,SPARC
SKBR3	1.78	7:99895401-100510600	DUP	615200	33	AC092849.1,ACHE,ACTL6B,C7orf61,EPHB4,EPO,FBXO24,GIGYF1,GNB2,MOSPD3,NYAP1,PCOLCE,PCOLCE-AS1,PILRA,PILRB,POP7,RN7SL161P,RN7SL416P,RN7SL549P,RN7SL750P,RP11-126L15.4,RP11-44M6.1,RP11-758P17.2,RP11-758P17.3,SAP25,SLC12A9,SPDYE3,STAG3L5P-PVRIG2P-PILRB,TFR2,TRIP6,TSC22D4,UFSP1,Y_RNA	EPHB4
SKBR3	1.78	7:101460301-102009500	DUP	549200	10	AC005088.1,CTA-339C12.1,CTA-357J21.1,CTB-181H17.1,CUX1,MIR4285,PRKRIP1,SH2B2,SNORA48,Y_RNA	CUX1
SKBR3	1.78	20:12753501-14171100	DUP	1417600	14	AL117333.1,ESF1,ISM1,ISM1-AS1,MACROD2,NDUFAF5,RNU6-278P,RP11-157E14.1,RP5-1069C8.2,RP5-1069C8.3,RP5-1077I2.3,SEL1L2,SPTLC3,TASP1	MACROD2
SKBR3	1.77	1:153614354-154799997	DUP	1185643	50	ADAR,AL590431.1,AL606500.1,AQP10,ATP8B2,C1orf189,C1orf43,CHRNB2,CHTOP,CREB3L4,GATAD2B,HAX1,IL6R,ILF2,INTS3,JTB,KCNN3,MIR190B,MIR5698,NPR1,NUP210L,RAB13,RN7SL372P,RN7SL431P,RNU6-121P,RNU6-179P,RNU6-239P,RNU7-57P,RP11-216N14.8,RP11-216N14.9,RP11-350G8.5,RP11-350G8.9,RP11-422P24.10,RP11-422P24.11,RP11-61L14.6,RPS27,SHE,SLC27A3,SLC39A1,SNAPIN,SNORA58,SNORD59,TDRD10,TPM3,U3,UBAP2L,UBE2Q1,UBE2Q1-AS1,Y_…	IL6R,RPS27,TPM3
SKBR3	1.77	7:26324101-27169700	DUP	845600	16	AC004079.1,AC004540.4,AC004540.5,AC004947.2,C7orf71,HOTAIRM1,HOXA-AS2,HOXA-AS3,HOXA1,HOXA2,HOXA3,HOXA4,KIAA0087,RP1-170O19.22,SKAP2,SNX10	HOXA3
SKBR3	1.77	7:39892301-42386100	DUP	2493800	14	AC004988.1,AC005022.1,AC005027.3,AC005029.1,AC005160.3,CDK13,GLI3,INHBA,INHBA-AS1,MPLKIP,RN7SL496P,RP11-467D6.1,SUGCT,Y_RNA	INHBA
SKBR3	1.77	7:104728501-105028700	DUP	300200	5	CTB-152G17.6,KMT2E,RNU6-1322P,RP4-778K6.3,SRPK2	KMT2E
SKBR3	1.76	7:16174101-18475200	DUP	2301100	26	AC003075.4,AC006482.1,AC010082.2,AC017060.1,AC019117.1,AC019117.2,AC073333.1,AC073333.8,AC080080.1,AC091697.1,AGR2,AGR3,AHR,ANKMY2,BZW2,GS1-166A23.1,GS1-166A23.2,HDAC9,ISPD,ISPD-AS1,MIR1302-6,PRPS1L1,SNORA63,SNX13,SOSTDC1,TSPAN13	HDAC9
SKBR3	1.76	7:91386401-93327100	DUP	1940700	28	AC000120.7,AC002454.1,AC007566.10,AKAP9,ANKIB1,CALCR,CCDC132,CDK6,CTB-161K23.1,CYP51A1,ERVW-1,FAM133B,GATAD1,GNGT1,HEPACAM2,KRIT1,LRRD1,MIR1285-1,MIR489,MIR653,MTERF,PEX1,RBM48,RN7SL7P,RNU6-10P,SAMD9,SAMD9L,Y_RNA	CDK6
SKBR3	1.75	7:4448001-4721800	DUP	273800	1	FOXK1	FOXK1
SKBR3	1.75	7:73629001-73828500	DUP	199500	4	CLIP2,LAT2,RFC2,RNU6-1070P	CLIP2
SKBR3	1.75	7:101334501-101459100	DUP	124600	1	CUX1	CUX1
SKBR3	1.75	7:102801401-104464600	DUP	1663200	11	CTB-107G13.1,DNAJC2,LHFPL3,LHFPL3-AS1,ORC5,PMPCB,PSMC2,RELN,RN7SKP86,SLC26A5,Y_RNA	RELN
SKBR3	1.75	20:14936001-15711500	DUP	775500	6	AL121584.1,MACROD2,RNA5SP475,RNU6-1159P,RNU6-115P,RP11-388K2.1	MACROD2
SKBR3	1.74	7:76870801-77699400	DUP	828600	12	AC073635.5,CCDC146,MAGI2,PHTF2,PTPN12,RP5-1185I7.1,RP5-899E9.1,RSBN1L,RSBN1L-AS1,TMEM60,Y_RNA,snoU13	MAGI2
SKBR3	1.74	20:9548834-33855028	DUP	24306194	99	AL023913.1,AL035045.1,AL050321.1,AL109754.1,AL117333.1,AL118509.1,AL121584.1,AL121893.1,ANKEF1,BANF2,BFSP1,BTBD3,C20orf187,CSRP2BP,DSTN,DTD1,DZANK1,ESF1,FLRT3,ISM1,ISM1-AS1,JAG1,KIF16B,LINC00493,LINC00687,LINC00851,MACROD2,MACROD2-AS1,MACROD2-IT1,MGME1,MIR3192,MKKS,NDUFAF5,OTOR,OVOL2,PAK7,PCSK2,PET117,POLR3F,RBBP9,RN7SKP111,RN7SKP69,RN7SKP74,RN7SL14P,RN7SL638P,RN7SL864P,RNA5SP475,RNA5SP476,RNU1-1…	JAG1,MACROD2
SKBR3	1.73	7:77700001-78202100	DUP	502100	1	MAGI2	MAGI2
SKBR3	1.73	7:79681101-80215600	DUP	534500	7	AC003988.1,AC004862.6,CD36,GNAI1,GNAT3,RN7SL35P,RN7SL869P	CD36
SKBR3	1.73	7:80216501-80312000	DUP	95500	1	CD36	CD36
SKBR3	1.73	7:86323901-88031700	DUP	1707800	22	ABCB1,ABCB4,AC003991.3,AC005009.1,AC005009.2,AC005076.5,ADAM22,CROT,CTA-254O6.1,CTB-167B5.1,CTB-167B5.2,DMTF1,GRM3,KIAA1324L,RUNDC3B,SLC25A40,SRI,STEAP4,TMEM243,TP53TG1,Y_RNA,snoU13	ABCB1,GRM3
SKBR3	1.73	10:72335401-74563700	DUP	2228300	37	ADAMTS14,AL359832.1,AL513185.1,ANAPC16,ASCC1,C10orf105,C10orf54,CDH23,CDH23-AS1,CHST3,DDIT4,DNAJB12,MCU,MIR4676,Metazoa_SRP,PCBD1,PRF1,PSAP,RNU6-805P,RNU7-38P,RP11-150D20.5,RP11-167P22.3,RP11-354E23.5,RP11-432J9.3,RP11-432J9.5,RP11-432J9.6,RP11-442H21.2,RP11-472G21.2,SGPL1,SLC29A3,SNORA36,SPOCK2,TBATA,UNC5B,UNC5B-AS1,Y_RNA,snoU13	PRF1
SKBR3	1.73	20:61263401-61492000	DUP	228600	14	COL9A3,LINC00659,LINC00686,MRGBP,NTSR1,OGFR,OGFR-AS1,RP11-93B14.4,RP11-93B14.5,RP11-93B14.6,RP13-30A9.1,RP13-30A9.2,SLCO4A1,TCFL5	OGFR
SKBR3	1.72	7:95742801-96476000	DUP	733200	10	AC004458.1,AC084368.1,C7orf76,MIR591,RNU6-364P,RNU6-532P,RNU7-188P,RP11-682N22.1,SHFM1,SLC25A13	SLC25A13
SKBR3	1.72	7:106412901-107320200	DUP	907300	16	AC004492.1,BCAP29,COG5,CTA-360L10.1,CTA-363E19.2,DUS4L,GPR22,HBP1,PIK3CG,PRKAR2B,RNA5SP236,RP4-593H12.1,RP5-884M6.1,SLC26A4,SLC26A4-AS1,snoU109	PIK3CG
SKBR3	1.72	7:110657101-111959500	DUP	1302400	8	DOCK4,DOCK4-AS1,IMMP2L,LRRN3,RN7SKP187,RNA5SP237,ZNF277,snoU13	IMMP2L
SKBR3	1.71	7:93832301-94701500	DUP	869200	8	CASD1,COL1A2,PEG10,PPP1R9A,RN7SKP129,RNU6-1328P,RNU6-956P,SGCE	SGCE
SKBR3	1.69	7:113477201-113683100	DUP	205900	1	PPP1R3A	PPP1R3A
SKBR3	1.69	10:81092801-81400900	DUP	308100	9	AL133481.1,EIF5AL1,PPIF,RP11-342M3.1,RP11-342M3.5,RP11-589B3.6,SFTPA1,SFTPA2,ZCCHC24	SFTPA1
SKBR3	1.68	1:153216501-155779300	DUP	2562800	98	ADAM15,ADAR,AL590431.1,AL606500.1,AQP10,ATP8B2,BX470102.3,C1orf189,C1orf43,CHRNB2,CHTOP,CKS1B,CREB3L4,DPM3,EFNA1,EFNA3,EFNA4,FLAD1,GATAD2B,HAX1,IL6R,ILF2,INTS3,JTB,KCNN3,KRTCAP2,LOR,MIR190B,MIR4258,MIR5698,MIR92B,MTX1,MUC1,NPR1,NUP210L,PBXIP1,PGLYRP3,PGLYRP4,PMVK,PYGO2,RAB13,RN7SL372P,RN7SL431P,RN7SL44P,RNU6-121P,RNU6-160P,RNU6-179P,RNU6-239P,RNU7-150P,RNU7-57P,RP1-178F15.4,RP1-178F15.5,RP11-201K…	CKS1B,IL6R,MUC1,RPS27,SHC1,TPM3
SKBR3	1.68	7:110212801-110345600	DUP	132800	1	IMMP2L	IMMP2L
SKBR3	1.67	1:156527101-157005300	DUP	478200	27	AL365181.1,APOA1BP,ARHGEF11,BCAN,CRABP2,GPATCH4,HAPLN2,HDGF,INSRR,IQGAP3,ISG20L2,LRRC71,MIR765,MRPL24,NES,NTRK1,PRCC,RN7SL612P,RP11-284F21.10,RP11-284F21.11,RP11-284F21.7,RP11-284F21.9,RP11-66D17.3,RP11-66D17.5,RRNAD1,SH2D2A,TTC24	CRABP2,NTRK1
SKBR3	1.67	3:187053383-192273116	DUP	5219733	50	AC022498.1,AC026320.1,AC063932.1,AC067718.1,BCL6,CCDC50,CLDN1,CLDN16,FGF12,FGF12-AS1,FGF12-AS2,FGF12-AS3,IL1RAP,LEPREL1,LEPREL1-AS1,LPP,LPP-AS1,LPP-AS2,MIR28,MIR944,OSTN,OSTN-AS1,PYDC2,RN7SKP222,RN7SKP296,RN7SL486P,RNU6-1109P,RP11-132N15.1,RP11-132N15.2,RP11-132N15.3,RP11-197K6.1,RP11-211G3.2,RP11-211G3.3,RP11-268E23.2,RP11-30O15.1,RP11-430L16.1,RP11-44H4.1,RP11-567G11.1,RP11-655G22.1,RP11-95L3.2…	BCL6,LPP
SKBR3	1.67	5:147787177-154760493	DUP	6973316	99	ABLIM3,AC008625.1,AC010295.1,AC010441.1,AC012613.2,AC021078.1,AC034205.1,AC091962.3,AC091969.1,AC131025.8,ADRB2,ANXA6,ARHGEF37,ARSI,ATOX1,CAMK2A,CCDC69,CD74,CDX1,CSNK1A1,CTB-113P19.1,CTB-113P19.3,CTB-113P19.4,CTB-113P19.5,CTB-12O2.1,CTB-140J7.2,CTB-158E9.1,CTB-17P3.4,CTB-89H12.4,CTC-251D13.1,CTC-345K18.2,CTC-367J11.1,CTC-529P8.1,CTD-2283N19.1,DCTN4,FAM114A2,FAT2,FBXO38,G3BP1,GALNT10,GLRA1,GM2A,GP…	PDGFRB,RPS14,SPARC
SKBR3	1.67	7:110353001-110536500	DUP	183500	2	AC073326.3,IMMP2L	IMMP2L
SKBR3	1.67	20:61725601-62370900	DUP	645300	33	ARFGAP1,ARFRP1,BIRC7,C20orf195,CHRNA4,COL20A1,CTD-3184A7.4,EEF1A2,GMEB2,HAR1A,HAR1B,HELZ2,KCNQ2,LIME1,MIR124-3,MIR3196,MIR4326,NKAIN4,PPDPF,PTK6,RNU6-994P,RP11-261N11.8,RP11-358D14.2,RP4-583P15.14,RP4-697K14.3,RP5-963E22.4,RP5-963E22.5,RTEL1,SRMS,STMN3,TNFRSF6B,YTHDF1,ZGPAT	ARFRP1,BIRC7,EEF1A2,PTK6
SKBR3	1.66	7:18475801-19534400	DUP	1058600	8	AC003986.5,AC003986.6,AC003986.7,AC004744.3,AC007091.1,FERD3L,HDAC9,RN7SKP266	HDAC9
SKBR3	1.66	7:78202901-78815300	DUP	612400	5	MAGI2,MAGI2-AS1,MAGI2-AS2,MAGI2-IT1,RNU6-337P	MAGI2
SKBR3	1.66	7:78816301-78843500	DUP	27200	1	MAGI2	MAGI2
SKBR3	1.66	7:86204301-86323700	DUP	119400	1	GRM3	GRM3
SKBR3	1.65	1:206482301-206696300	DUP	214000	6	C1orf147,IKBKE,RASSF5,RP11-534L20.5,SRGAP2,SRGAP2-AS1	IKBKE
SKBR3	1.65	7:80751601-81774300	DUP	1022700	7	AC005008.2,AC006145.1,AC008163.4,AC010091.1,CACNA2D1,HGF,MIR1255B1	HGF
SKBR3	1.64	1:161388301-161598600	DUP	210300	7	FCGR2A,FCGR2B,FCGR3A,FCGR3B,HSPA6,RP11-25K21.6,RP11-5K23.5	FCGR2B
SKBR3	1.64	7:13720201-14606700	DUP	886500	5	AC005019.3,AC011288.2,DGKB,ETV1,Y_RNA	ETV1
SKBR3	1.64	7:82726901-83016900	DUP	290000	3	AC079799.2,PCLO,SEMA3E	PCLO
SKBR3	1.63	1:201871101-202141400	DUP	270300	11	ARL8A,ELF3,GPR37L1,LMOD1,PTPN7,RNPEP,RP11-465N4.4,RP11-465N4.5,RP11-510N19.5,SNORA70,TIMM17A	ELF3
SKBR3	1.62	1:203237801-205922700	DUP	2684900	65	AC096645.1,AC119673.1,AL161793.1,AL583832.1,ATP2B4,CDK18,CHIT1,CNTN2,DSTYK,ELK4,ETNK2,FMOD,GOLT1A,KISS1,KLHDC8A,LAX1,LEMD1,LEMD1-AS1,LINC00303,LINC01136,LRRN2,MDM4,MFSD4,MIR135B,NFASC,NUAK2,NUCKS1,OPTC,PIK3C2B,PLEKHA6,PM20D1,PPP1R15B,PRELP,RAB7L1,RBBP5,REN,RNA5SP74,RNA5SP75,RNU2-19P,RNU6-418P,RNU6-487P,RP11-134P9.3,RP11-203F10.5,RP11-23I7.1,RP11-383G10.5,RP11-430C7.4,RP11-430C7.5,RP11-576D8.4,RP1…	MDM4,PIK3C2B,SLC45A3
SKBR3	1.62	5:141988401-142224100	DUP	235700	6	AC005370.1,AC005592.1,AC005592.2,AC005592.3,ARHGAP26,FGF1	ARHGAP26
SKBR3	1.62	7:110536701-110656200	DUP	119500	2	AC005161.1,IMMP2L	IMMP2L
SKBR3	1.61	1:159649601-161386400	DUP	1736800	77	ACA64,ADAMTS4,AL121987.1,AL138930.1,AL138930.2,AL590560.1,AL590714.1,AL591806.1,ATP1A4,B4GALT3,C1orf192,C1orf204,CASQ1,CCDC19,CD244,CD48,CD84,COPA,CRP,DCAF8,DEDD,DUSP23,F11R,FCER1G,IGSF8,IGSF9,ITLN1,ITLN2,KCNJ10,KCNJ9,KLHDC9,LINC01133,LY9,MIR5187,NCSTN,NDUFS2,NHLH1,NIT1,NR1I3,PCP4L1,PEA15,PEX19,PFDN2,PIGM,PPOX,PVRL4,RNU4-42P,RNU6-481P,RP11-122G18.5,RP11-122G18.8,RP11-190A12.8,RP11-226L15.5,RP11-2…	B4GALT3,NCSTN,SDHC
SKBR3	1.61	3:183743001-184097800	DUP	354800	21	ABCF3,AP2M1,CAMK2N2,CLCN2,DVL3,ECE2,EIF4G1,FAM131A,HTR3C,HTR3D,HTR3E,HTR3E-AS1,MIR1224,POLR2H,PSMD2,RP11-778D9.12,RP11-778D9.13,SNORD66,THPO,VWA5B2,Y_RNA	PSMD2
SKBR3	1.61	7:78844201-79253500	DUP	409300	3	MAGI2,MAGI2-AS3,RNU6-530P	MAGI2
SKBR3	1.61	7:82257101-82726200	DUP	469100	2	PCLO,RNA5SP235	PCLO
SKBR3	1.61	17:25438301-26780400	DUP	1342100	40	AC061975.10,AC061975.8,CTB-96E2.2,CTB-96E2.3,CTB-96E2.7,CTD-2008P7.1,CTD-2008P7.10,CTD-2008P7.3,CTD-2008P7.8,CTD-2008P7.9,CTD-2350C19.1,CTD-2350C19.2,KSR1,LGALS9,LYRM9,MIR4522,MIR4723,NLK,NOS2,POLDIP2,RN7SL576P,RP1-66C13.4,RP11-138P22.1,RP11-173M1.4,RP11-173M1.8,RP11-19P22.5,RP11-19P22.8,RP11-218F4.1,RP11-663N22.1,RP11-720N19.2,SARM1,SCARNA20,SLC46A1,SNORA70,TMEM199,TMEM97,TNFAIP1,VTN,Vault,WSB1	WSB1
SKBR3	1.6	1:155845001-156266100	DUP	421100	26	AL355388.1,ARHGEF2,BGLAP,KIAA0907,LAMTOR2,LMNA,MEX3A,PAQR6,PMF1,PMF1-BGLAP,RAB25,RIT1,RNU4-19P,RP11-336K24.12,RP11-336K24.5,RXFP4,SCARNA4,SEMA4A,SLC25A44,SMG5,SNORA26,SNORA42,SSR2,SYT11,TMEM79,UBQLN4	RAB25,SMG5
SKBR3	1.58	1:152230401-152555600	DUP	325200	9	CRCT1,CRNN,FLG,FLG-AS1,FLG2,LCE3D,LCE3E,LCE5A,RP1-91G5.3	FLG
SKBR3	1.58	6:10582901-11617100	DUP	1034200	25	C6orf52,ELOVL2,ELOVL2-AS1,ERVFRD-1,GCM2,GCNT2,GCNT6,MAK,NEDD9,PAK1IP1,RNA5SP203,RNU1-64P,RP11-421M1.8,RP11-637O19.2,RP11-679B17.2,RP11-716O23.1,RP11-716O23.2,RP3-510L9.1,SMIM13,SYCP2L,TMEM14B,TMEM14C,TMEM170B,Y_RNA,snoU13	NEDD9
SKBR3	1.58	20:14843501-14934800	DUP	91300	3	MACROD2,MACROD2-AS1,RP5-974N19.1	MACROD2
SKBR3	1.57	1:226497301-227613900	DUP	1116600	14	ADCK3,C1orf95,CDC42BPA,CTD-2090I13.1,ITPKB,ITPKB-AS1,ITPKB-IT1,LIN9,PARP1,PSEN2,RN7SKP165,RP11-1B20.1,RP5-1087E8.3,snoU13	PARP1
SKBR3	1.56	1:157006101-158413700	DUP	1407600	24	ARHGEF11,CD1A,CD1B,CD1C,CD1D,CD1E,CD5L,ETV3,ETV3L,FCRL1,FCRL3,FCRL4,FCRL5,KIRREL,KIRREL-IT1,OR10K2,OR10T2,RP11-367J7.3,RP11-404O13.1,RP11-404O13.5,RP11-71G12.1,RP11-85G21.1,RP11-85G21.2,RP11-85G21.3	CD1D,FCRL4
SKBR3	1.56	1:164170601-165498700	DUP	1328100	15	AL390119.1,LMX1A,PBX1,RNU5F-6P,RNU6-171P,RNU6-755P,RP11-280O1.2,RP11-38C18.2,RP11-38C18.3,RP11-477H21.2,RP11-506O24.1,RP11-506O24.2,RXRG,SNORD112,Y_RNA	PBX1,RXRG
SKBR3	1.56	1:182866901-184183400	DUP	1316500	19	AL137800.1,AL450304.1,APOBEC4,ARPC5,COLGALT2,LAMC1,LAMC2,NCF2,NMNAT2,RGL1,RNA5SP71,RNU6-41P,RP1-127C7.6,RP11-181K3.4,RP11-444D13.1,SHCBP1L,SMG7-AS1,TSEN15,Y_RNA	RGL1
SKBR3	1.55	1:161639701-162696500	DUP	1056800	23	ATF6,C1orf111,C1orf226,DDR2,FCGR2B,FCRLA,FCRLB,MIR4654,MIR556,NOS1AP,RN7SL466P,RNA5SP61,RP11-227F8.2,RP11-25K21.1,RP11-359K18.3,RP11-359K18.4,RP11-474I16.8,RP11-565P22.2,RP11-565P22.6,SH2D1B,UAP1,UHMK1,Y_RNA	DDR2,FCGR2B
SKBR3	1.55	1:166433401-168572300	DUP	2138900	37	ADCY10,CD247,CREG1,DCAF6,DUSP27,GPA33,GPR161,ILDR2,MAEL,MIR1255B2,MIR557,MPC2,MPZL1,POGK,POU2F1,RCSD1,RNA5SP65,RNU6-1310P,RP1-313L4.3,RP11-102C16.3,RP11-104L21.2,RP11-104L21.3,RP11-276E17.2,RP11-277B15.2,RP11-277B15.3,RP11-52A20.2,RP3-455J7.4,RP4-782G3.1,RP5-968D22.1,RP5-968D22.3,SFT2D2,TADA1,TBX19,TIPRL,XCL1,XCL2,snoU13	RCSD1
SKBR3	1.55	1:176785701-177118100	DUP	332400	3	ASTN1,MIR488,PAPPA2	PAPPA2
SKBR3	1.55	1:210892001-212008900	DUP	1116900	21	AC092017.1,AL356310.1,KCNH1,KCNH1-IT1,LINC00467,LPGAT1,NEK2,RCOR3,RD3,RN7SL344P,RP11-122M14.1,RP11-122M14.3,RP11-318L16.6,RP11-354K1.2,RP11-359E8.3,RP11-359E8.5,RP11-543B16.3,RP11-552D8.1,SLC30A1,TRAF5,Y_RNA	TRAF5
SKBR3	1.55	6:17988201-18402100	DUP	413900	7	DEK,KDM1B,NHLRC1,RNF144B,RNU6-263P,TPMT,Y_RNA	DEK,KDM1B,TPMT
SKBR3	1.55	8:125825833-140753665	DUP	14927832	100	AC011652.1,AC011652.2,AC016178.1,AC016178.2,AC068570.1,AC090573.1,ADCY8,AF216667.1,AF230666.2,ASAP1,CASC11,CASC19,CASC8,CCAT1,CCDC26,CTC-137K3.1,CTD-2309H9.3,CTD-2501M5.1,CTD-2588J1.1,EFR3A,FAM49B,FAM84B,HHLA1,HPYR1,KB-1568E2.1,KCNQ3,KIAA0196-AS1,LINC00861,LINC00964,LINC00977,LRRC6,MIR1205,MIR1207,MIR1208,MIR3686,MIR4662A,MIR5194,MYC,NDRG1,NSMCE2,OC90,PCAT1,PCAT2,POU5F1B,PVT1,RN7SKP206,RN7SKP226,…	MYC,NDRG1
SKBR3	1.54	10:69819901-71980200	DUP	2160300	47	AC016821.1,AC025426.1,AIFM2,AL138925.1,ATOH7,C10orf35,CCAR1,COL13A1,DDX21,DDX50,DNA2,H2AFY2,HERC4,HK1,HKDC1,HNRNPH3,KIAA1279,MIR1254-1,MYPN,NEUROG3,PBLD,PPA1,RN7SKP202,RN7SL373P,RNA5SP319,RNU6-571P,RNU6-697P,RP11-119F7.5,RP11-153K11.3,RP11-227H15.4,RP11-227H15.5,RP11-242G20.1,RP11-262I2.2,RP11-343J3.2,SAR1A,SLC25A16,SNORD98,SRGN,STOX1,SUPV3L1,TACR2,TET1,TSPAN15,TYSND1,VPS26A,Y_RNA,snoU13	TET1
SKBR3	1.54	17:61700401-62213100	DUP	512700	21	C17orf72,CCDC47,CD79B,CSH1,CSH2,CSHL1,CTC-264K15.6,DDX42,ERN1,FTSJ3,GH1,GH2,ICAM2,LIMD2,MAP3K3,PSMC5,RN7SL805P,RP11-214C8.2,SCN4A,SMARCD2,STRADA	CD79B,MAP3K3,STRADA
SKBR3	1.54	20:14171601-14842400	DUP	670800	5	FLRT3,MACROD2,MACROD2-IT1,RN7SL864P,RNU6-228P	MACROD2
SKBR3	1.53	1:171066501-172593500	DUP	1527000	28	C1orf105,DNM3,DNM3-IT1,DNM3OS,FMO1,FMO2,FMO3,FMO4,METTL13,MIR1295A,MIR199A2,MIR214,MYOC,PIGC,PRRC2C,RN7SL425P,RNU6-157P,RNU6-290P,RNU6-693P,RNU6-773P,RP1-127D3.4,RP1-45C12.1,SCARNA20,SNORD112,SUCO,VAMP4,Y_RNA,snoU13	MYOC
SKBR3	1.53	6:14388801-16105800	DUP	1717000	14	AL050335.1,DTNBP1,JARID2,JARID2-AS1,RN7SL332P,RNU6-522P,RNU6-645P,RNU6-793P,RP11-146I2.1,RP11-330A16.1,RP11-401E14.2,RP11-560J1.2,RP3-448I9.1,RP3-448I9.2	JARID2
SKBR3	1.53	13:110906201-111366000	DUP	459800	8	CARKD,COL4A1,COL4A2,COL4A2-AS1,COL4A2-AS2,ING1,RAB20,snoU13	ING1
SKBR3	1.52	1:162698101-163028900	DUP	330800	4	C1orf110,DDR2,HSD17B7,RN7SL861P	DDR2
SKBR3	1.52	1:177653501-180293000	DUP	2639500	47	ABL2,ACBD6,AL160286.1,AL359853.1,ANGPTL1,AXDND1,C1ORF220,C1orf220,CEP350,FAM163A,FAM20B,IFRG15,LHX4,LINC00083,MIR4424,NPHS2,QSOX1,RASAL2,RASAL2-AS1,RN7SL230P,RN7SL374P,RNA5SP69,RNU5F-2P,RP11-12M5.1,RP11-12M5.3,RP11-12M5.4,RP11-428K3.1,RP11-502H18.2,RP11-533E19.2,RP11-533E19.5,RP11-533E19.7,RP11-545A16.1,RP11-545A16.4,RP11-63B19.1,RP4-593C16.3,RP4-798P15.3,RP5-1098D14.1,RP5-1180C10.2,SEC16B,SNORA6…	ABL2
SKBR3	1.52	1:220134401-221125400	DUP	991000	23	AC096644.1,BPNT1,C1orf115,EPRS,HLA-AS1,HLX,IARS2,MARC1,MARK1,MIR194-1,MIR215,RAB3GAP2,RN7SL464P,RNU6ATAC35P,RP11-295M18.2,RP11-295M18.6,RP11-302I18.3,RP11-322F10.2,RP11-410C4.4,RP11-410C4.5,SNORA36B,U3,snoU13	MARK1
SKBR3	1.52	1:226152601-226496600	DUP	344000	9	ACBD3,H3F3A,LIN9,MIXL1,RP11-275I14.4,RP11-396C23.2,RP11-396C23.4,SDE2,snoU13	H3F3A
SKBR3	1.51	1:176478801-176785000	DUP	306200	1	PAPPA2	PAPPA2
SKBR3	1.51	1:219354110-221305491	DUP	1951381	31	AC096643.1,AC096644.1,BPNT1,C1orf115,EPRS,HLA-AS1,HLX,IARS2,LYPLAL1,MARC1,MARK1,MIR194-1,MIR215,RAB3GAP2,RN7SL464P,RNA5SP76,RNU6ATAC35P,RP11-135J2.3,RP11-295M18.2,RP11-295M18.6,RP11-302I18.3,RP11-322F10.2,RP11-392O17.1,RP11-410C4.4,RP11-410C4.5,RP11-95P13.1,RP11-95P13.2,SLC30A10,SNORA36B,U3,snoU13	MARK1
SKBR3	1.51	17:74236801-75216100	DUP	979300	35	AANAT,CTD-2246P4.1,CYGB,JMJD6,LINC00338,LINC00868,METTL23,MFSD11,MGAT5B,MIR636,MXRA7,PRCD,PRPSAP1,QRICH2,RNU4-47P,RNU6-227P,RNU6-24P,RNU6-97P,RP11-318A15.2,RP11-318A15.7,RP11-666A8.12,RP11-666A8.7,RP11-666A8.8,RP11-666A8.9,RP11-87G24.3,RP11-87G24.6,SEC14L1,SNHG16,SNORD1B,SPHK1,SRSF2,UBALD2,UBE2O,Y_RNA,snoU13	SRSF2
SKBR3	1.5	1:215404201-216203300	DUP	799100	4	KCTD3,RP5-1111A8.3,SNORD116,USH2A	USH2A
SKBR3	1.5	3:181817601-183609300	DUP	1791700	28	AC131160.1,ATP11B,B3GNT5,DCUN1D1,KLHL24,KLHL6,KLHL6-AS1,LAMP3,MAP6D1,MCCC1,MCCC1-AS1,MCF2L2,MIR4448,PARL,RNA5SP151,RP11-139K4.1,RP11-139K4.2,RP11-225N10.1,RP11-338L18.1,RP11-416O18.2,RP11-531F16.4,RP11-646E18.2,RP11-646E18.4,SNORA4,SNORA63,SNORA81,YEATS2,YEATS2-AS1	DCUN1D1,KLHL6
SKBR3	1.5	6:20223001-21456400	DUP	1233400	11	AL136303.1,CDKAL1,E2F3,E2F3-IT1,RN7SL128P,RNU6-141P,RNU6-150P,RP1-135L22.1,RP11-239H6.2,RP3-348I23.2,Y_RNA	E2F3
SKBR3	1.49	3:14043301-14308700	DUP	265400	6	AC093495.4,CHCHD4,LSM3,TMEM43,TPRXL,XPC	XPC
SKBR3	1.49	13:110347401-110417900	DUP	70500	2	IRS2,LINC00676	IRS2
SKBR3	1.49	17:60648201-61699900	DUP	1051700	25	AC015923.1,AC037445.1,ACE,CYB561,DCAF7,KCNH6,MAP3K3,MARCH10,MIR633,MRC2,RNU6-288P,RNU6-446P,RP11-156L14.1,RP11-180P8.1,RP11-180P8.3,RP11-269G24.2,RP11-269G24.3,RP11-269G24.4,RP11-269G24.6,RP11-453A12.1,RP11-556O9.2,TACO1,TANC2,TLK2,Y_RNA	MAP3K3
SKBR3	1.49	17:62905301-64960400	DUP	2055100	21	AC006080.1,AC006947.1,APOH,AXIN2,CACNG5,CEP112,CTD-2535L24.3,GNA13,LRRC37A3,MIR634,RN7SL735P,RNA5SP444,RNA5SP445,RNA5SP446,RNU6-928P,RP11-160O5.1,RP11-4F22.2,RP11-583F2.2,RP11-583F2.5,RP11-927P21.1,RP11-927P21.11	AXIN2,GNA13
SKBR3	1.49	17:78298408-78789198	DUP	490790	5	CTD-2047H16.4,CTD-2526A2.2,MIR4730,RNF213,RP11-28G8.1	RNF213
SKBR3	1.47	3:187734801-187920900	DUP	186100	4	AC022498.1,LPP,LPP-AS2,RP11-430L16.1	LPP
SKBR3	1.47	13:111366601-111704500	DUP	337900	6	ANKRD10,ANKRD10-IT1,ING1,LINC00346,LINC00431,LINC00567	ING1
SKBR3	1.46	1:170483601-171064600	DUP	581000	9	BX284613.1,FMO3,GORAB,MROH9,PRRX1,RP1-79C4.1,RP1-79C4.4,RP11-545I10.2,RP11-576I22.2	PRRX1
SKBR3	1.46	1:185696501-186826100	DUP	1129600	14	AL596220.1,C1orf27,GS1-174L6.4,GS1-304P7.3,HMCN1,OCLM,PDC,PLA2G4A,PRG4,PTGS2,RNU6-1240P,RP11-295K2.3,RP5-973M2.2,TPR	HMCN1,PRG4,PTGS2
SKBR3	1.46	1:193131701-193434300	DUP	302600	3	B3GALT2,CDC73,LINC01031	CDC73
SKBR3	1.46	8:85777886-112481781	DUP	26703895	100	AB015752.3,AC013751.1,AC016885.1,AC091096.1,AC105081.1,AC117834.1,AF070718.1,AF121898.3,ATP6V0D2,C8orf59,C8orf87,C8orf88,CA1,CA13,CA2,CA3,CDH17,CNGB3,CPNE3,CTA-392E5.1,CTB-118P15.2,CTD-2006H14.2,CTD-2284J15.1,CTD-3118D11.2,CTD-3118D11.3,CTD-3239E11.2,DCAF4L2,E2F5,FAM92A1,GEM,GS1-251I9.2,GS1-251I9.3,GS1-251I9.4,GS1-5L10.1,KB-1184D12.1,LINC00534,LINC00535,LINC01030,LRRC69,LRRCC1,MIR378D2,MIR4661,MM…	NBN,RUNX1T1
SKBR3	1.45	1:146795501-147425000	DUP	629500	11	ACP6,BCL9,GJA5,GJA8,GPR89B,LINC00624,RN7SL261P,RP11-433J22.2,RP11-433J22.3,RP11-533N14.3,Y_RNA	BCL9
SKBR3	1.45	1:192787901-193130600	DUP	342700	9	CDC73,GLRX2,LINC01032,MIR1278,RN7SKP126,RP11-101E13.5,TROVE2,UCHL5,snoU109	CDC73
SKBR3	1.44	1:176102201-176469400	DUP	367200	3	PAPPA2,RNU2-12P,RP11-195C7.1	PAPPA2
SKBR3	1.44	10:60694104-72305079	DUP	11610975	98	AC016821.1,AC022538.1,AC025426.1,AC067742.1,AC067751.1,ADO,AL138925.1,AL356741.1,AL671972.1,ANK3,ARID5B,ATOH7,C10orf107,C10orf35,C10orf40,CCAR1,CCDC6,CDK1,COL13A1,CTNNA3,DDX21,DDX50,DNA2,DNAJC12,EGR2,FAM13C,H2AFY2,HERC4,HK1,HKDC1,HNRNPH3,JMJD1C-AS1,KIAA1279,LINC00844,LINC00845,LINC00948,LRRTM3,MIR1254-1,MIR1296,MYPN,NEUROG3,NRBF2,PBLD,PHYHIPL,REEP3,RHOBTB1,RN7SKP202,RN7SL220P,RN7SL373P,RN7SL394P,…	ARID5B,CCDC6,CTNNA3,TET1
SKBR3	1.44	10:61441701-61720000	DUP	278300	4	C10orf40,CCDC6,LINC00948,SLC16A9	CCDC6
SKBR3	1.43	1:216204201-216952600	DUP	748400	4	ESRRG,RP11-22M7.2,RP5-1099E6.3,USH2A	USH2A
SKBR3	1.43	13:103211201-104091800	DUP	880600	16	BIVM,BIVM-ERCC5,CCDC168,ERCC5,KDELC1,LINC00283,LINC00555,METTL21C,RNY5P8,RP11-123H22.1,RP11-255P5.2,RP11-29B2.5,SLC10A2,TEX30,TPP2,snoU13	ERCC5
SKBR3	1.42	1:158414301-158856700	DUP	442400	14	MNDA,OR10K1,OR10R2,OR10X1,OR10Z1,OR6K2,OR6K3,OR6K6,OR6N1,OR6N2,OR6P1,OR6Y1,RP11-144L1.4,SPTA1	SPTA1
SKBR3	1.41	1:146462201-146793600	DUP	331400	8	CHD1L,NBPF12,PRKAB2,RNVU1-8,RP11-337C18.10,RP11-337C18.8,RP11-337C18.9,RP4-704D21.2	CHD1L
SKBR3	1.41	6:33551301-33937800	DUP	386500	10	GGNBP1,IP6K3,ITPR3,LEMD2,LINC00336,LINC01016,MIR3934,MLN,RP3-468B3.2,SBP1	ITPR3
SKBR3	1.41	10:63440801-64129500	DUP	688700	9	AC067742.1,AL671972.1,ARID5B,C10orf107,RN7SL591P,RP11-120C12.3,RP11-491H19.1,RP11-63A2.2,RTKN2	ARID5B
SKBR3	1.4	3:155284201-156166100	DUP	881900	7	AC104472.1,C3orf33,GMPS,KCNAB1-AS1,KCNAB1-AS2,PLCH1,SLC33A1	GMPS
SKBR3	1.4	3:160031101-161232100	DUP	1201000	18	ARL14,B3GALNT1,IFT80,KPNA4,MIR15B,MIR16-2,NMD3,OTOL1,PPM1L,RNU7-136P,RP11-16N11.2,RP11-3P17.4,RP11-3P17.5,SCARNA7,SMC4,SNORA72,SPTSSB,TRIM59	SMC4
SKBR3	1.4	4:103332101-103500500	DUP	168400	5	AF213884.2,AF213884.3,NFKB1,RP11-499E18.1,SLC39A8	NFKB1
SKBR3	1.4	13:110419101-110437100	DUP	18000	1	IRS2	IRS2
SKBR3	1.39	4:88430401-89300500	DUP	870100	19	ABCG2,DMP1,DSPP,HERC6,IBSP,MEPE,PKD2,PPM1K,RNU1-36P,RNU6-112P,RNU6-1298P,RNU6-818P,RNU6ATAC31P,RP11-10L7.1,RP11-742B18.1,SPARCL1,SPP1,Y_RNA,snoU13	DMP1
SKBR3	1.39	4:103500901-104033300	DUP	532400	10	BDH2,CENPE,CISD2,NFKB1,RNU7-151P,RP11-10L12.4,SLC9B1,SLC9B2,UBE2D3,snoU13	NFKB1
SKBR3	1.39	4:105923501-107088000	DUP	1164500	18	AC004066.3,AC004069.2,ARHGEF38,ARHGEF38-IT1,GSTCD,INTS12,NPNT,PPA2,RN7SL89P,RNU6-553P,RP11-45L9.1,RP11-556I14.1,RP11-710F7.2,RP11-710F7.3,SNORA31,TBCK,TET2,TET2-AS1	TET2
SKBR3	1.39	4:108279501-110673800	DUP	2394300	26	AC004051.2,AC004067.5,AC084209.1,AC097473.1,CASP6,CCDC109B,CYP2U1,ETNPPL,HADH,LEF1,LEF1-AS1,MIR576,OSTC,PAPSS1,PLA2G12A,RN7SL55P,RNU6-431P,RNU6-551P,RNU6-733P,RP11-286E11.1,RP11-286E11.2,RPL34,RPL34-AS1,SEC24B,SEC24B-AS1,SGMS2	LEF1
SKBR3	1.38	1:149669401-150715900	DUP	1046500	57	ADAMTSL4,ADAMTSL4-AS1,AL356356.1,AL358813.2,ANP32E,APH1A,BOLA1,C1orf51,C1orf54,CA14,CTSS,ECM1,ENSA,FAM231D,FCGR1A,GOLPH3L,HIST2H2AA3,HIST2H2AA4,HIST2H2AB,HIST2H2AC,HIST2H2BE,HIST2H2BF,HIST2H3A,HIST2H3C,HIST2H3D,HIST2H4B,HORMAD1,LINC00568,MCL1,MIR4257,MRPS21,MTMR11,OTUD7B,PLEKHO1,PRPF3,RN7SL473P,RN7SL480P,RN7SL600P,RNU1-68P,RNU2-17P,RNU6-1042P,RP11-196G18.21,RP11-196G18.22,RP11-196G18.23,RP11-196G…	APH1A,MCL1
SKBR3	1.38	1:150717501-150857500	DUP	140000	5	ARNT,CTSK,CTSS,RNU6-1309P,Y_RNA	ARNT
SKBR3	1.38	3:178550901-179445000	DUP	894100	23	AC007620.3,ACTL6A,GNB4,KCNMB2,KCNMB3,MFN1,MRPL47,PIK3CA,RP11-145M9.4,RP11-145M9.5,RP11-145M9.6,RP11-15L13.4,RP11-245C23.3,RP11-255C15.3,RP11-255C15.4,RP11-360P21.2,RP11-385J1.2,SNORA25,USP13,Y_RNA,ZMAT3,ZNF639,snoU13	PIK3CA
SKBR3	1.38	3:187921301-188502100	DUP	580800	4	AC063932.1,LPP,LPP-AS1,MIR28	LPP
SKBR3	1.38	4:98425601-100509700	DUP	2084100	23	AC019131.1,ADH1A,ADH1B,ADH4,ADH5,ADH6,ADH7,C4orf17,EIF4E,METAP1,MIR3684,RAP1GDS1,RNU7-149P,RP11-1299A16.3,RP11-323J4.1,RP11-571L19.7,RP11-571L19.8,RP11-681L8.1,RP11-696N14.1,RP11-724M22.1,STPG2,TRMT10A,Y_RNA	RAP1GDS1
SKBR3	1.37	5:140238901-141405700	DUP	1166800	70	AC005609.1,AC005618.6,AC005740.5,AC005740.6,AC005754.7,AC005754.8,AC008781.7,ARAP3,CTD-2024I7.13,FCHSD1,GNPDA1,KIAA0141,PCDH1,PCDH12,PCDHA1,PCDHA10,PCDHA11,PCDHA12,PCDHA13,PCDHA2,PCDHA3,PCDHA4,PCDHA5,PCDHA6,PCDHA7,PCDHA8,PCDHA9,PCDHAC1,PCDHAC2,PCDHB1,PCDHB10,PCDHB11,PCDHB12,PCDHB13,PCDHB14,PCDHB15,PCDHB16,PCDHB17,PCDHB2,PCDHB3,PCDHB4,PCDHB5,PCDHB6,PCDHB7,PCDHB8,PCDHGA1,PCDHGA10,PCDHGA11,PCDHGA12,…	PCDHGA1
SKBR3	1.37	14:38140858-38737959	DUP	597101	9	AL161751.1,CLEC14A,CTD-2058B24.2,CTD-2058B24.3,CTD-2142D14.1,LINC00517,RNU6-1277P,SNORA42,SSTR1	SSTR1
SKBR3	1.37	14:38570601-38737900	DUP	167300	5	AL161751.1,CLEC14A,CTD-2058B24.2,CTD-2142D14.1,SSTR1	SSTR1
SKBR3	1.36	3:195585101-195680300	DUP	95200	8	AC124944.3,AC124944.5,RN7SL773P,RNU2-11P,RP11-352G9.1,RP11-480A16.1,TNK2,TNK2-AS1	TNK2
SKBR3	1.36	6:33942701-34204700	DUP	262000	4	AL590403.1,GRM4,HMGA1,MIR1275	HMGA1
SKBR3	1.36	17:76283501-76638800	DUP	355300	11	AC061992.1,AC061992.2,CTD-2357A8.3,DNAH17-AS1,PGS1,RN7SL236P,RN7SL454P,RP11-559N14.5,RP11-806H10.4,SNORA30,SOCS3	SOCS3
SKBR3	1.35	3:158184601-158403700	DUP	219100	5	GFM1,LXN,MLF1,RP11-538P18.2,RSRC1	MLF1
SKBR3	1.35	17:75218701-76282200	DUP	1063500	26	AC087645.1,AFMID,BIRC5,C17orf99,FLJ45079,MIR4316,RNU1-80P,RNU6-625P,RP11-13K12.1,RP11-13K12.2,RP11-13K12.5,RP11-219G17.4,RP11-285E9.5,RP11-285E9.6,RP11-316M20.1,RP11-75C10.7,RP11-75C10.9,RP11-936I5.1,SEPT9,SYNGR2,TK1,TMC6,TMC8,TMEM235,TNRC6C,Y_RNA	BIRC5,TK1
SKBR3	1.34	6:30413501-30912600	DUP	499100	32	ABCF1,AL662800.1,AL662800.2,ATAT1,DDR1,DDR1-AS1,DHX16,DPCR1,GNL1,GTF2H4,HCG20,HLA-E,IER3,LINC00243,MDC1,MDC1-AS1,MIR4640,MIR877,MRPS18B,NRM,PPP1R10,PPP1R18,PRR3,RN7SKP186,RN7SL175P,RN7SL353P,TUBB,XXbac-BPG249D20.9,XXbac-BPG252P9.10,XXbac-BPG252P9.9,XXbac-BPG27H4.8,Y_RNA	DDR1
SKBR3	1.34	10:68127901-69485600	DUP	1357700	5	CTNNA3,LRRTM3,RP11-344A5.1,snoR442,snoU13	CTNNA3
SKBR3	1.34	13:102258601-103209300	DUP	950700	11	FGF14,FGF14-AS1,FGF14-AS2,FGF14-IT1,ITGBL1,MIR2681,MIR4705,RNU1-24P,RNY1P2,RP11-397O8.7,RP11-811P12.3	FGF14
SKBR3	1.33	3:161187645-190252433	DUP	29064788	98	AC007919.1,AC007919.2,AC069243.1,AC092962.1,AC092964.1,AC092964.2,AC092965.1,AC104637.1,ACTRT3,BCHE,CLDN11,CT64,EIF5A2,FNDC3B,GHSR,GOLIM4,GPR160,LRRC31,LRRC34,LRRIQ4,MECOM,MIR1263,MIR551B,MIR569,MIR720,MYNN,NCEH1,OTOL1,PDCD10,PHC3,PLD1,PP13439,PRKCI,RN7SKP298,RN7SL141P,RNU1-70P,RNU2-20P,RNU4-38P,RNU6-315P,RNU6-348P,RNU6-547P,RNU6-637P,RNY5P3,RP11-10O22.1,RP11-12K11.2,RP11-152C17.1,RP11-185E8.1,RP…	EIF5A2,MECOM,PRKCI,TERC
SKBR3	1.33	5:137886201-138787100	DUP	900900	24	AC034243.1,CTB-43P18.1,CTB-46B19.2,CTNNA1,DNAJC18,ECSCR,HSPA9,LRRTM2,MATR3,PAIP2,PROB1,RN7SKP64,RN7SL867P,RNA5SP194,RNA5SP195,RNU5B-4P,RNU6-572P,SIL1,SLC23A1,SNORA74,SNORA74A,SNORD63,SPATA24,snoU13	CTNNA1
SKBR3	1.32	3:195700601-197353900	DUP	1653300	46	AC069257.8,AC127904.2,AC128709.2,AC128709.3,AC128709.4,BDH1,CEP19,CTD-2002J20.1,DLG1,DLG1-AS1,FBXO45,LINC00885,LINC01063,MFI2-AS1,MIR4797,NCBP2,NCBP2-AS1,NCBP2-AS2,NRROS,PAK2,PCYT1A,PIGX,PIGZ,RN7SL434P,RN7SL738P,RNF168,RNU6-1279P,RNU6-42P,RNU6-646P,RNU6-910P,RNU7-18P,RP13-616I3.1,SENP5,SLC51A,SMCO1,TCTEX1D2,TFRC,TM4SF19,TM4SF19-AS1,U4,UBXN7,UBXN7-AS1,WDR53,Y_RNA,ZDHHC19,snoU13	BDH1,PAK2,TFRC
SKBR3	1.32	17:69902701-70469200	DUP	566500	10	AC005152.3,AC007461.1,AC007461.2,LINC00511,LINC01152,RP11-1124B17.1,RP11-57A1.1,RP11-84E24.2,SOX9,SOX9-AS1	SOX9
SKBR3	1.32	17:73334301-73354800	DUP	20500	2	GRB2,RP11-16C1.3	GRB2
SKBR3	1.32	17:73355501-74236100	DUP	880600	43	AC100787.1,ACOX1,CASKIN2,CDK3,EVPL,EXOC7,FBF1,FOXJ1,GALK1,GALR2,GRB2,H3F3B,ITGB4,KIAA0195,LLGL2,MIR3678,MIR4738,MRPL38,MYO15B,RNF157,RNF157-AS1,RNU6-938P,RP11-16C1.1,RP11-16C1.2,RP11-16C1.3,RP11-474I11.7,RP11-474I11.8,RP11-552F3.10,RP11-552F3.13,RP11-552F3.4,RP11-552F3.9,SAP30BP,SMIM5,SMIM6,SRP68,TEN1,TRIM47,TRIM65,TSEN54,UNC13D,UNK,WBP2,Y_RNA	GRB2
SKBR3	1.31	6:32625801-33549100	DUP	923300	41	AL645941.1,B3GALT4,BAK1,BRD2,BRD2-IT1,COL11A2,DAXX,HCG24,HCG25,HLA-DOA,HLA-DPA1,HLA-DPB1,HLA-DQA2,HLA-DQB1-AS1,HLA-DQB2,HSD17B8,KIFC1,MIR219-1,MIR3135B,MIR5004,PFDN6,PHF1,PSMB9,RGL2,RING1,RN7SL26P,RNY4P10,RPS18,RXRB,SLC39A7,TAP2,TAPBP,TAPSAR1,VPS52,XXbac-BPG157A10.21,XXbac-BPG181M17.5,XXbac-BPG181M17.6,XXbac-BPG254F23.6,XXbac-BPG254F23.7,ZBTB22,ZBTB9	BRD2,DAXX,PHF1,RXRB
SKBR3	1.31	17:73040601-73333400	DUP	292800	17	ARMC7,GGA3,GRB2,HN1,KCTD2,MIF4GD,MRPS7,NT5C,NUP85,RP11-649A18.12,RP11-649A18.4,RP11-649A18.5,RP11-649A18.7,SLC16A5,SLC25A19,SUMO2,Y_RNA	GRB2
SKBR3	1.3	3:181084801-181817100	DUP	732300	8	RN7SKP265,RN7SL703P,RNA5SP150,RP11-275H4.1,RP11-416O18.1,RP11-4B14.3,SOX2,SOX2-OT	SOX2
SKBR3	1.3	8:88841513-112481933	DUP	23640420	100	AB015752.3,AC016885.1,AC023632.1,AC091096.1,AC105081.1,AC116154.1,AC117834.1,AF070718.1,C8orf37,C8orf87,C8orf88,CCNE2,CDH17,CTB-118P15.2,CTD-2006H14.2,CTD-3239E11.2,DCAF4L2,DPY19L4,ESRP1,FAM92A1,GDF6,GEM,GS1-251I9.2,GS1-251I9.3,GS1-251I9.4,GS1-5L10.1,INTS8,KB-1043D8.6,KB-1043D8.8,KB-1047C11.1,KB-1047C11.2,KB-1184D12.1,KB-1608C10.2,KIAA1429,LINC00534,LINC00535,LINC01030,LRRC69,MIR3150A,MIR378D2,MI…	NBN,RUNX1T1,TP53INP1
SKBR3	1.3	8:88841972-112480890	DUP	23638918	100	AB015752.3,AC016885.1,AC023632.1,AC091096.1,AC105081.1,AC116154.1,AC117834.1,AF070718.1,C8orf37,C8orf87,C8orf88,CCNE2,CDH17,CTB-118P15.2,CTD-2006H14.2,CTD-3239E11.2,DCAF4L2,DPY19L4,ESRP1,FAM92A1,GDF6,GEM,GS1-251I9.2,GS1-251I9.3,GS1-251I9.4,GS1-5L10.1,INTS8,KB-1043D8.6,KB-1043D8.8,KB-1047C11.1,KB-1047C11.2,KB-1184D12.1,KB-1608C10.2,KIAA1429,LINC00534,LINC00535,LINC01030,LRRC69,MIR3150A,MIR378D2,MI…	NBN,RUNX1T1,TP53INP1
SKBR3	1.29	3:30105301-30782200	DUP	676900	8	AC116035.1,AC116035.2,AC137674.1,AC137674.2,GADL1,RP11-1024P17.1,TGFBR2,U3	TGFBR2
SKBR3	1.28	1:116644601-117874700	DUP	1230100	28	AL136376.1,AL157904.1,AL355794.1,ATP1A1,ATP1A1OS,C1orf137,CD101,CD2,CD58,IGSF3,MAB21L3,MIR320B1,MIR548AC,MIR942,PTGFRN,RNA5SP55,RNU6-817P,RP11-27K13.3,RP11-39H13.1,RP4-655J12.4,RP4-655J12.5,RP4-753F5.1,RP5-1086K13.1,RP5-1185H19.2,TTF2,U3,VTCN1,Y_RNA	CD58
SKBR3	1.28	1:119808201-120696900	DUP	888700	19	ADAM30,HAO2,HAO2-IT1,HMGCS2,HSD3B1,HSD3B2,LINC00622,NOTCH2,PHGDH,REG4,RNU1-75P,RNU6-465P,RP11-114O18.1,RP11-418J17.1,RP11-418J17.3,RP5-1042I8.7,RP5-834N19.1,RP6-42F4.1,ZNF697	HAO2,HSD3B1,NOTCH2,PHGDH,REG4
SKBR3	1.27	1:110243101-112044400	DUP	1801300	59	ADORA3,AHCYL1,AL365361.1,ALX3,ATP5F1,C1orf162,CD53,CEPT1,CHI3L2,CHIA,CSF1,DENND2D,DRAM2,EPS8L3,GSTM1,GSTM2,GSTM3,GSTM5,KCNA10,KCNA2,KCNA3,KCNC4-AS1,LAMTOR5,LAMTOR5-AS1,LRIF1,OVGP1,PIFO,PROK1,RBM15,RNA5SP54,RNU6-792P,RP11-195M16.1,RP11-195M16.3,RP11-284N8.3,RP11-470L19.2,RP11-470L19.5,RP11-552M11.4,RP11-552M11.8,RP11-96K19.2,RP11-96K19.4,RP11-96K19.5,RP4-735C1.4,RP4-735C1.6,RP4-773N10.4,RP4-773N10…	CSF1,GSTM1,RBM15
SKBR3	1.27	3:2747601-3412000	DUP	664400	7	AC026188.1,CNTN4,CNTN4-AS1,IL5RA,RP11-97C16.1,SNORA43,TRNT1	CNTN4
SKBR3	1.27	6:34205601-34262600	DUP	57000	5	C6orf1,HMGA1,NUDT3,RP11-513I15.6,RPS10-NUDT3	HMGA1
SKBR3	1.26	1:47362401-48848700	DUP	1486300	29	AL109659.1,AL356458.1,AL591415.1,CMPK1,CYP4A11,CYP4A22,CYP4A22-AS1,CYP4X1,CYP4Z1,FLJ00388,FOXD2,FOXD2-AS1,FOXE3,LINC00853,PDZK1IP1,RNU6-723P,RP1-18D14.7,RP11-193P11.3,RP11-330M19.1,RP11-511I2.2,RP11-543D5.1,RP11-543D5.2,RP4-683M8.2,RP5-1024N4.2,RP5-1024N4.4,SPATA6,STIL,TAL1,TRABD2B	TAL1
SKBR3	1.26	1:59197401-59516500	DUP	319100	7	AL136985.1,JUN,LINC01135,RP11-63G10.2,RP11-63G10.3,RP4-794H19.1,RP4-794H19.4	JUN
SKBR3	1.26	10:67316501-67822600	DUP	506100	3	AC022538.1,CTNNA3,RP11-222A11.1	CTNNA3
SKBR3	1.26	10:67959801-68127200	DUP	167400	1	CTNNA3	CTNNA3
SKBR3	1.25	1:43274301-44808200	DUP	1533900	44	AL390776.1,ARTN,ATP6V0B,B4GALT2,C1orf210,CCDC23,CDC20,DMAP1,DPH2,EBNA1BP2,ELOVL1,ERI3,ERI3-IT1,ERMAP,FAM183A,HYI-AS1,IPO13,KDM4A,KDM4A-AS1,KLF17,MED8,MPL,PTPRF,RN7SL479P,RNA5SP46,RNU6-1058P,RNU6-870P,RNU6-880P,RP1-92O14.3,RP1-92O14.6,RP11-184I16.4,RP11-342M1.3,RP11-7O11.3,RP5-1198O20.4,SLC2A1,SLC2A1-AS1,SLC6A9,SZT2,SZT2-AS1,TIE1,TMEM125,WDR65,Y_RNA,ZNF691	MPL,TIE1
SKBR3	1.25	1:85453601-86212900	DUP	759300	18	AL590113.1,BCL10,C1orf52,COL24A1,CYR61,DDAH1,MCOLN2,MCOLN3,MIR4423,RP11-131L23.1,RP11-131L23.2,RP11-290M5.2,RP11-290M5.4,SNORD81,SYDE2,WDR63,Y_RNA,ZNHIT6	BCL10
SKBR3	1.25	1:117975901-118593700	DUP	617800	7	AL157902.3,FAM46C,GDAP2,MAN1A2,SNORA40,SPAG17,WDR3	FAM46C
SKBR3	1.24	1:6803001-7764200	DUP	961200	11	CAMTA1,CAMTA1-IT1,RNU1-8P,RP11-312B8.1,RP11-334N17.1,RP11-338N10.1,RP11-338N10.2,RP11-338N10.3,RP3-453P22.2,RP4-549F15.1,snoU13	CAMTA1
SKBR3	1.24	1:46151001-47241400	DUP	1090400	27	ATPAF1,CYP4B1,DMBX1,EFCAB14,EFCAB14-AS1,FAAH,GPBP1L1,IPP,LINC00505,LRRC41,LURAP1,MAST2,MKNK1-AS1,MOB3C,NSUN4,PIK3R3,POMGNT1,RAD54L,RP11-322N21.2,RP11-767N6.7,RP4-533D7.4,RP4-533D7.5,RP5-1109J22.2,TEX38,TMEM69,TSPAN1,UQCRH	PIK3R3
SKBR3	1.24	1:48955501-49175000	DUP	219500	1	AGBL4	AGBL4
SKBR3	1.24	8:110181401-111260300	DUP	1078900	10	EBAG9,KCNV1,NUDCD1,PKHD1L1,RNU2-67P,RP11-122A21.2,RP11-422N16.3,RP11-696P8.2,SNORD112,SYBU	PKHD1L1
SKBR3	1.24	10:67823401-67959300	DUP	135900	2	CTNNA3,RP11-210G22.1	CTNNA3
SKBR3	1.23	1:6240301-6295300	DUP	55000	3	ICMT,RP1-120G22.11,RPL22	RPL22
SKBR3	1.23	1:93287201-95690500	DUP	2403300	48	ABCA4,ABCD3,AC093577.1,ALG14,BCAR3,CCDC18,CNN3,DNTTIP2,DR1,F3,FAM69A,FNBP1L,GCLM,LINC01057,MIR378G,MIR760,MTF2,RN7SKP123,RN7SL440P,RN7SL692P,RNA5SP53,RNU6-210P,RNU6-970P,RP11-148B18.1,RP11-148B18.3,RP11-148B18.4,RP11-313A24.1,RP11-465K1.2,RP11-488P3.1,RP11-57H12.2,RP11-57H12.3,RP11-78O9.1,RP11-86H7.6,RP11-86H7.7,RP4-561L24.3,RP4-639F20.1,RP4-717I23.3,RP5-1033H22.2,RPL5,SLC44A3,SNORA51,SNORA66,SNO…	RPL5
SKBR3	1.22	1:2685201-3845300	DUP	1160100	28	ACTRT2,AL691523.1,ARHGEF16,C1orf174,CCDC27,CEP104,DFFB,LINC00982,LINC01134,LRRC47,MEGF6,MIR551A,PRDM16,RN7SL574P,RP1-163G9.2,RP1-286D6.5,RP11-168F9.2,RP11-22L13.1,RP11-46F15.2,RP11-740P5.2,RP11-740P5.3,RP5-1092A11.2,RP5-1092A11.5,SMIM1,TP73,TP73-AS1,TPRG1L,WRAP73	PRDM16,TP73
SKBR3	1.22	6:27069601-27237900	DUP	168300	8	HIST1H2AG,HIST1H2AH,HIST1H2BJ,HIST1H2BK,HIST1H4I,MIR3143,RNU2-62P,RP1-86C11.7	HIST1H2AG,HIST1H2BJ,HIST1H2BK,HIST1H4I
SKBR3	1.22	17:26654055-75068122	DUP	48414067	100	ABHD15,AC010761.10,AC010761.13,AC010761.14,AC010761.6,AC010761.8,AC010761.9,AC024619.2,AC104984.4,AC104996.1,ALDOC,ANKRD13B,BLMH,CRYBA1,CTB-96E2.2,CTB-96E2.3,CTB-96E2.7,CTD-2350C19.1,CTD-2350C19.2,DHRS13,EFCAB5,ERAL1,FAM222B,FLOT2,FOXN1,GIT1,KIAA0100,MIR3184,MIR423,MIR451B,MIR4523,MIR4723,MYO18A,NEK8,NSRP1,NUFIP2,PHF12,PIPOX,POLDIP2,PROCA1,RAB34,RNU4-34P,RNU6-1034P,RNU6-1267P,RNU6-711P,RNU6-920P,…	ERAL1,MYO18A,PHF12
SKBR3	1.21	1:2160601-2566200	DUP	405600	23	AL589739.1,FAM213B,HES5,MMEL1,MORN1,PANK4,PEX10,PLCH2,RER1,RP13-436F16.1,RP3-395M20.12,RP3-395M20.2,RP3-395M20.3,RP3-395M20.7,RP3-395M20.8,RP3-395M20.9,RP4-713A8.1,RP4-740C4.6,RP4-740C4.7,RP4-740C4.8,RP4-740C4.9,SKI,TNFRSF14	TNFRSF14
SKBR3	1.21	1:7765701-9173900	DUP	1408200	31	CA6,CAMTA1,ENO1,ENO1-AS1,ENO1-IT1,ERRFI1,GPR157,PARK7,PER3,RERE,RN7SL451P,RN7SL729P,RNU1-7P,RNU6-304P,RNU6-991P,RP11-431K24.1,RP11-431K24.3,RP11-431K24.4,RP3-467L1.4,RP3-467L1.6,RP4-633I8.4,RP5-1115A15.1,SCARNA16,SLC2A5,SLC2A7,SLC45A1,SNORA77,TNFRSF9,UTS2,VAMP3,Y_RNA	CAMTA1,ERRFI1
SKBR3	1.21	1:9649501-9887300	DUP	237800	5	C1orf200,CLSTN1,PIK3CD,RP11-558F24.4,TMEM201	PIK3CD
SKBR3	1.21	1:50440201-50872600	DUP	432400	6	AGBL4,AL645730.1,AL645730.2,ELAVL4,RP11-567C20.2,RP11-567C20.3	AGBL4
SKBR3	1.21	3:1750401-2747100	DUP	996700	4	CNTN4,CNTN4-AS2,RN7SKP144,RP11-204C23.1	CNTN4
SKBR3	1.21	3:4363453-37183396	DUP	32819943	99	AC018495.3,AC018506.1,AC018816.3,AC018832.1,AC022007.5,AC023481.1,AC026167.1,AC026202.1,AC026202.3,AC026202.5,AC027119.1,AC034187.1,AC034187.2,AC034187.3,AC034187.4,AC034187.5,AC069276.1,AC069277.2,AC090841.1,AC090939.1,ARL8B,ARPC4,ATG7,ATP2B2,ATP2B2-IT1,ATP2B2-IT2,BHLHE40,BHLHE40-AS1,BRK1,BRPF1,CAMK1,CAV3,CIDEC,CPNE9,CRELD1,EGOT,EMC3,FANCD2,FANCD2OS,GHRL,GHRLOS,GRM7-AS1,GRM7-AS2,GRM7-AS3,HRH1,IL…	BRPF1,FANCD2,VHL
SKBR3	1.12	11:78039087-78042214	DEL	3127	2	GAB2,RP11-452H21.1	GAB2
SKBR3	1.12	11:78039091-78042570	DUP	3479	2	GAB2,RP11-452H21.1	GAB2
SKBR3	0.77	8:129450786-142256307	DEL	12805521	91	AC011652.1,AC011652.2,AC016178.1,AC016178.2,AC022681.1,AC068570.1,AC083843.1,AC083843.2,AC083843.3,ADCY8,AF216667.1,AF230666.2,AGO2,ASAP1,C8orf17,CASC7,CCDC26,CHRAC1,COL22A1,CTA-204B4.2,CTC-137K3.1,CTD-2309H9.3,CTD-2342N23.3,CTD-2501M5.1,CTD-2534J5.1,CTD-2588J1.1,DENND3,EFR3A,FAM135B,FAM49B,HHLA1,HPYR1,KB-1568E2.1,KCNQ3,KHDRBS3,LINC00977,LRRC6,MIR151A,MIR30B,MIR30D,MIR3686,MIR5194,NDRG1,OC90,PTK2…	COL22A1,FAM135B,NDRG1,PTK2
SKBR3	0.77	12:10840112-12972262	DEL	2132150	48	AC007450.1,AC018630.1,BCL2L14,CDKN1B,CREBL2,DUSP16,ETV6,GPR19,LOH12CR1,LOH12CR2,LRP6,MANSC1,MIR613,PRB1,PRB2,PRB3,PRB4,PRH1,PRH2,PRR4,RNU6-1295P,RNU6-545P,RNU6-676P,RNU7-60P,RP11-180M15.3,RP11-180M15.4,RP11-253I19.3,RP11-434C1.1,RP11-434C1.2,RP11-711K1.7,RP11-711K1.8,RP11-785H5.2,RP13-81N3.2,TAS2R10,TAS2R13,TAS2R14,TAS2R19,TAS2R20,TAS2R30,TAS2R31,TAS2R42,TAS2R43,TAS2R46,TAS2R50,TAS2R7,TAS2R8,TAS2…	CDKN1B,ETV6
SKBR3	0.68	6:64850652-64851677	DEL	1025	1	EYS	EYS
SKBR3	0.66	17:2971201-9519600	DEL	6548400	99	AC012146.7,AC091153.4,AC109333.10,AC118754.4,ALOX15,ANKFY1,ARRB2,ASPA,ATP2A3,C17orf107,C17orf85,CAMKK1,CAMTA2,CHRNE,CTC-524C5.2,CTD-2309O5.3,CTD-3195I5.1,CTD-3195I5.3,CTD-3195I5.4,CTD-3195I5.5,CTNS,CXCL16,CYB5D2,EMC6,ENO3,GGT6,GLTPD2,GP1BA,GSG2,INCA1,ITGAE,KIF1C,MED11,MINK1,MYBBP1A,NUP88,OR1A1,OR1A2,OR1D2,OR1E1,OR1E2,OR1G1,OR3A1,OR3A2,OR3A3,P2RX5,PELP1,PFN1,PLD2,PSMB6,RABEP1,RN7SL171P,RN7SL774P,R…	RABEP1,USP6
SKBR3	0.65	3:85375201-85478000	DEL	102800	2	CADM2,MIR5688	CADM2
SKBR3	0.65	6:66261801-66327700	DEL	65900	1	EYS	EYS
SKBR3	0.65	17:9525301-11381300	DEL	1856000	39	AC000003.1,AC000003.2,AC005284.1,AC005725.1,ADPRM,CTC-297N7.1,CTC-297N7.10,CTC-297N7.11,CTC-297N7.5,CTC-297N7.7,CTC-297N7.8,CTC-297N7.9,DHRS7C,GAS7,GLP2R,LINC00675,MYH1,MYH13,MYH2,MYH4,MYH8,PIRT,RCVRN,RN7SL601P,RNU6-1065P,RP11-401O9.3,RP11-401O9.4,RP11-477N12.3,RP11-55L4.1,RP11-55L4.2,RP11-680C21.1,RP11-799N11.1,RP11-963H4.3,RP11-963H4.5,SCO1,SHISA6,TMEM220,USP43,WDR16	GAS7
SKBR3	0.64	17:12355301-18325500	DEL	5970200	99	AC002553.1,AC003664.1,AC005224.2,AC005304.1,AC005324.6,AC005324.7,AC005358.1,AC005358.3,AC005375.1,AC005703.2,AC005703.3,AC005772.2,AC005863.1,AC005863.2,AC013248.2,AC015922.6,AC022816.2,AC055811.1,AC104024.1,AC104024.2,ADORA2B,ARHGAP44,CCDC144A,CDRT1,CDRT15,CDRT4,CDRT7,CDRT8,COPS3,COX10,COX10-AS1,CTD-3157E16.1,FAM211A-AS1,FLCN,HS3ST3A1,LINC00670,MED9,MIR1269B,MIR1288,MIR4731,MIR548H3,MPRIP,MPRIP…	FLCN,NCOR1
SKBR3	0.63	17:11382101-12353600	DEL	971500	10	AC005701.1,DNAH9,MAP2K4,MIR744,RNU11-2P,RP11-1096G20.5,RP11-471L13.2,RP11-628O18.1,SHISA6,ZNF18	MAP2K4
SKBR3	0.62	8:81871801-83499000	DEL	1627200	20	CHMP4C,FABP4,FABP5,FABP9,IMPA1,PAG1,PMP2,RP11-1149M10.1,RP11-1149M10.2,RP11-157I4.4,RP11-172E10.1,RP11-257P3.3,RP11-354A14.1,RP11-363E6.3,RP11-363E6.4,RP11-653B10.1,RP11-99H20.1,RP13-923O23.6,SLC10A5,SNX16	FABP5,PAG1
SKBR3	0.56	16:85438701-88347600	DEL	2908900	74	AC010536.1,AC092377.1,BANP,C16orf74,C16orf95,CA5A,COX4I1,CTD-2015G9.1,CTD-2015G9.2,CTD-2542L18.1,FBXO31,FENDRR,FLJ00104,FOXC2,FOXF1,FOXL1,GINS2,GS1-21A4.1,GSE1,IRF8,JPH3,KLHDC4,LA16c-444G7.1,LA16c-444G7.2,LINC00917,LINC01081,LINC01082,MAP1LC3B,MIR1910,MTHFSD,RN7SL381P,RNU1-103P,RP11-118F19.1,RP11-134D3.1,RP11-134D3.2,RP11-158I3.3,RP11-178L8.3,RP11-178L8.4,RP11-178L8.5,RP11-178L8.7,RP11-178L8.8,RP…	FBXO31,IRF8
SKBR3	0.55	10:98702101-100542600	DEL	1840500	40	AL139239.1,AL355490.1,AL355490.2,ANKRD2,ARHGAP19,ARHGAP19-SLIT1,AVPI1,C10orf12,C10orf62,CRTAC1,EXOSC1,FRAT1,FRAT2,GOLGA7B,HPS1,HPSE2,LCOR,LINC00866,LOXL4,MARVELD1,MIR1287,MIR4685,MMS19,MORN4,PGAM1,PI4K2A,PYROXD2,R3HCC1L,RP11-175O19.4,RP11-34A14.3,RP11-452K12.4,RP11-452K12.7,RP11-453E2.2,RRP12,SFRP5,SLIT1,UBTD1,Y_RNA,ZDHHC16,ZFYVE27	HPSE2
SKBR3	0.55	16:70201001-70877300	DEL	676300	28	AARS,AC009060.1,CLEC18C,DDX19A,DDX19B,EXOSC6,FKSG63,FLJ00418,FUK,HYDIN,IL34,MTSS1L,RN7SL279P,RN7SL407P,RNU6-23P,RP11-296I10.3,RP11-394B2.6,RP11-424M24.5,RP11-49C24.1,RP11-529K1.2,RP11-529K1.4,SF3B3,SNORD111,SNORD111B,ST3GAL2,VAC14,VAC14-AS1,snoU13	EXOSC6,HYDIN
SKBR3	0.55	16:79717901-83635700	DEL	3917800	54	7SK,AC009142.1,AC024590.1,AC092332.1,AC099506.1,AC138304.1,ATMIN,BCMO1,C16orf46,CDH13,CDYL2,CENPN,CMC2,CMIP,CTD-2055G21.1,CTD-2588J6.2,CTD-3253I12.1,DYNLRB2,GAN,GCSH,HSD17B2,MIR3182,MIR4720,PLCG2,RN7SKP190,RN7SL134P,RNU6-1191P,RP11-109P11.1,RP11-148M9.1,RP11-18F14.1,RP11-18F14.4,RP11-22H5.2,RP11-2L4.1,RP11-303E16.2,RP11-303E16.3,RP11-303E16.5,RP11-303E16.6,RP11-303E16.7,RP11-303E16.8,RP11-314O13.…	PLCG2
SKBR3	0.55	18:42447701-42466100	DEL	18400	1	SETBP1	SETBP1
SKBR3	0.55	18:42466101-44542100	DEL	2076000	26	ATP5A1,C18orf25,EPG5,HAUS1,KATNAL2,LOXHD1,MIR4319,PIAS2,PSTPIP2,RN7SKP26,RNF165,RNU6-1278P,RP11-116O18.1,RP11-116O18.3,RP11-309E23.2,RP11-687F6.1,RP11-742D12.2,RP11-749H17.1,RP11-749H17.2,RP11-846C15.2,SETBP1,SIGLEC15,SLC14A1,SLC14A2,ST8SIA5,Y_RNA	SETBP1
SKBR3	0.55	18:45546701-47870300	DEL	2323600	40	AC091150.1,ACAA2,C18orf32,CCDC11,CTIF,CXXC1,DYM,LIPG,MBD1,MIR1539,MIR4743,MIR4744,MYO5B,RN7SL310P,RNA5SP456,RNA5SP457,RNA5SP458,RNU6-708P,RNU7-191P,RP11-1030E3.1,RP11-1058N17.1,RP11-110H1.4,RP11-110H1.8,RP11-110H1.9,RP11-15F12.1,RP11-15F12.3,RP11-30L3.2,RP11-426J5.2,RP11-484L8.1,RP11-813F20.2,RP11-813F20.4,RPL17-C18orf32,SCARNA17,SCARNA18,SMAD7,SNORD58A,SNORD58B,SNORD58C,Y_RNA,ZBTB7C	MYO5B
SKBR3	0.54	5:130854101-131850000	DEL	995900	22	AC034220.3,AC034228.2,AC034228.3,AC034228.4,AC063976.3,AC116366.5,AC116366.6,C5orf56,CSF2,CTC-432M15.3,FNIP1,IL3,IRF1,MIR3936,P4HA2,P4HA2-AS1,PDLIM4,RAPGEF6,SLC22A4,SLC22A5,Y_RNA,snoZ6	IL3,IRF1
SKBR3	0.54	5:131855201-132919300	DEL	1064100	28	AC004041.2,AC004237.1,AC004775.5,AFF4,CCNI2,CTB-3M24.3,CTB-49A3.2,CTB-49A3.4,CTB-49A3.5,CTC-350I8.1,FSTL4,GDF9,HSPA4,IL13,IL4,IL5,KIF3A,LEAP2,MIR1289-2,RAD50,RNA5SP192,RP11-485M7.3,SEPT8,SHROOM1,SOWAHA,UQCRQ,Y_RNA,ZCCHC10	AFF4,RAD50
SKBR3	0.54	10:101600601-107137400	DEL	5536800	97	ABCC2,ACTR1A,AL160011.1,ARL3,AS3MT,BLOC1S2,BTRC,C10orf2,C10orf32,C10orf76,C10orf95,CHUK,CNNM2,CPN1,CUEDC2,CWF19L1,CYP17A1,CYP17A1-AS1,DNMBP,DNMBP-AS1,DPCD,ELOVL3,ERLIN1,FAM178A,FBXL15,FBXW4,GBF1,HIF1AN,HPS6,HUG1,KAZALD1,KCNIP2,KCNIP2-AS1,LBX1,LBX1-AS1,LDB1,LINC00263,LZTS2,MGEA5,MIR146B,MIR3158-2,MIR608,MRPL43,NDUFB8,NFKB2,NOLC1,NPM3,NT5C2,PAX2,PITX3,PKD2L1,POLL,PPRC1,PSD,RN7SL21P,RNU2-43P,RNU2-59…	ABCC2,NFKB2,NT5C2,SUFU,TLX1
SKBR3	0.54	12:119838801-120990800	DEL	1152000	34	AC002070.1,AC004812.1,AL021546.6,CCDC60,CCDC64,CIT,COQ5,DYNLL1,DYNLL1-AS1,GATC,GCN1L1,MIR1178,MIR4498,MSI1,PLA2G1B,PRKAB1,PXN,PXN-AS1,RAB35,RN7SKP197,RNF10,RNU4-1,RNU4-2,RNU6-1088P,RP1-127H14.3,RP1-166H1.2,RP11-768F21.1,RPLP0,SIRT4,SRSF9,TMEM233,TRIAP1,Y_RNA,snoU13	RAB35
SKBR3	0.54	16:64696701-68617300	DEL	3920600	100	AC009095.4,AC040160.1,AC040162.1,AC130462.1,AC132186.1,ACD,AGRP,B3GNT9,BEAN1,C16orf70,CA7,CBFB,CCDC79,CDH11,CDH16,CDH5,CES2,CES3,CES4A,CMTM1,CMTM2,CMTM3,CTC-479C5.10,CTC-479C5.17,CTC-479C5.6,CTCF,CTD-2012K14.2,CTD-2012K14.3,CTD-2012K14.4,CTD-2012K14.6,CTD-2012K14.7,CTD-2258A20.5,CTRL,DDX28,DPEP2,DPEP3,DUS2,DYNC1LI2,E2F4,EDC4,ELMO3,ENKD1,EXOC3L1,FAM65A,FAM96B,FBXL8,GFOD2,HSD11B2,HSF4,KIAA0895L,LCA…	CBFB,CDH11,CDH5,CES2,CTCF
SKBR3	0.54	16:88421045-90166800	DEL	1745756	71	AC092384.1,AC137932.1,AC137932.5,AC137932.6,ACSF3,ANKRD11,APRT,C16orf3,CBFA2T3,CDH15,CDK10,CDT1,CENPBD1,CHMP1A,CPNE7,CTD-2555A7.1,CTD-2555A7.2,CTD-2555A7.3,CTU2,CYBA,DBNDD1,DEF8,DPEP1,FANCA,GALNS,GAS8,LINC00304,MIR4722,MIR5189,PABPN1L,PIEZO1,PRDM7,RNF166,RNU6-430P,RNU7-117P,RP1-168P16.1,RP1-168P16.2,RP11-104N10.1,RP11-21B21.4,RP11-368I7.4,RP11-46C24.3,RP11-46C24.5,RP11-46C24.6,RP11-46C24.7,RP11-5…	CBFA2T3,FANCA,TUBB3
SKBR3	0.54	17:19140401-21193700	DEL	2053300	55	AC004448.2,AC004448.5,AC004702.2,AC008088.4,AC087294.2,AC087393.1,AC087499.10,AKAP10,ALDH3A2,B9D1,C17orf103,CCDC144NL,CDRT15L2,CTB-187M2.1,CTB-187M2.2,CTB-187M2.3,DHRS7B,EPN2,EPN2-AS1,LGALS9B,MAPK7,MFAP4,MIR1180,RN7SL17P,RN7SL426P,RNF112,RNU6-1057P,RNU6-1178P,RNU6-258P,RP11-1113L8.1,RP11-135L13.4,RP11-209D14.2,RP11-209D14.4,RP11-283C24.1,RP11-311F12.1,RP11-311F12.2,RP11-344E13.3,RP11-344E13.4,RP1…	MAPK7
SKBR3	0.54	17:41401201-43615900	DEL	2214700	99	AC002117.1,AC003043.1,AC003102.1,AC003102.3,AC015936.3,AC055813.1,AC091132.1,AC091132.2,ACBD4,ADAM11,ARHGAP27,ARL4D,ASB16,ASB16-AS1,ATXN7L3,C17orf104,C17orf105,C17orf53,C1QL1,CCDC103,CCDC43,CD300LG,CTB-175E5.7,CTB-39G8.2,CTB-39G8.3,CTC-296K1.3,CTC-296K1.4,CTC-501O10.1,CTD-2020K17.1,CTD-2020K17.3,CTD-2020K17.4,CTD-2534I21.8,CTD-2534I21.9,DBF4B,DCAKD,DUSP3,EFTUD2,ETV4,FAM171A2,FAM187A,FAM215A,FMNL1…	ETV4,MAP3K14
SKBR3	0.53	4:1470985-3572900	DEL	2101916	46	AL590235.1,C4orf48,DOK7,FAM193A,FAM53A,FGFR3,GRK4,HAUS3,HGFAC,HTT,HTT-AS,LETM1,LRPAP1,MFSD10,MIR4800,MIR943,MSANTD1,MXD4,NAT8L,NELFA,NOP14,NOP14-AS1,POLN,RN7SL589P,RN7SL671P,RNF4,RNU6-204P,RP11-1398P2.1,RP11-317B7.3,RP11-478C1.7,RP11-503N18.1,RP11-503N18.3,RP11-503N18.4,RP11-529E10.6,RP11-529E10.7,RP11-572O17.1,RP13-1016M1.2,SCARNA22,SH3BP2,SLBP,TACC3,TMEM129,TNIP2,WHSC1,Y_RNA,ZFYVE28	FGFR3,LETM1,WHSC1
SKBR3	0.53	4:23620401-26925200	DEL	3304800	33	AC092846.1,AC092846.2,AC093807.1,AC108218.1,ANAPC4,CCDC149,CCKAR,DHX15,LGI2,MIR573,PI4K2B,PPARGC1A,RBPJ,RN7SL16P,RNU7-126P,RP11-293A21.1,RP11-302F12.10,RP11-302F12.3,RP11-380P13.1,RP11-380P13.2,RP11-496D24.2,RP11-660M5.1,RP13-494C23.1,RP13-497K6.1,SEL1L3,SEPSECS,SLC34A2,SMIM20,SNORD74,SOD3,STIM2,TBC1D19,ZCCHC4	SLC34A2
SKBR3	0.53	8:140753801-141795300	DEL	1041500	9	AGO2,C8orf17,CASC7,CHRAC1,CTA-204B4.2,MIR151A,PTK2,RP11-284H18.1,TRAPPC9	PTK2
SKBR3	0.53	8:141912601-142058000	DEL	145400	2	PTK2,RNA5SP278	PTK2
SKBR3	0.53	10:97709201-98700000	DEL	990800	19	AL162502.1,BLNK,CC2D2B,CCNJ,DNTT,ENTPD1-AS1,LCOR,MIR3157,MIR607,OPALIN,PIK3AP1,RNA5SP324,RNU6-1274P,RNU6-271P,RP11-248J23.6,RP11-35J23.1,TLL2,TM9SF3,ZNF518A	TLL2
SKBR3	0.53	12:120992201-123436900	DEL	2444700	64	ABCB9,AC079602.1,AC084018.1,AC156455.1,ACADS,B3GNT4,BCL7A,C12orf43,CABP1,CAMKK2,CCDC62,CLIP1,DENR,DIABLO,HCAR1,HCAR2,HCAR3,HNF1A,HNF1A-AS1,HPD,IL31,KDM2B,KNTC1,LRRC43,MIR4700,MLEC,MLXIP,MORN3,OASL,ORAI1,P2RX4,POP5,PSMD9,RHOF,RNF10,RNF34,RNU6-1004P,RNU7-170P,RP11-173P15.3,RP11-173P15.5,RP11-173P15.7,RP11-216P16.2,RP11-324E6.6,RP11-324E6.9,RP11-340F14.5,RP11-347I19.8,RP11-450K4.1,RP11-463O12.3,RP11…	BCL7A,HNF1A,KDM2B
SKBR3	0.53	14:99897164-99989500	DEL	92336	5	CCDC85C,CCNK,RP11-688G15.3,SETD3,U6	SETD3
SKBR3	0.53	16:71092201-73472100	DEL	2379900	58	AC002044.4,AC004158.2,AC004158.3,AC004943.1,AC092289.1,AC106736.1,AC132068.1,AC140912.1,AP1G1,ATXN1L,C16orf47,CALB2,CHST4,CMTR2,CTD-2520I13.1,DHODH,DHX38,HCCAT5,HP,HPR,HYDIN,IST1,MARVELD3,PKD1L3,PMFBP1,RNU6-1061P,RNU6-208P,RNU6-385P,RNU7-71P,RNU7-90P,RP11-140I24.1,RP11-23E19.1,RP11-23E19.2,RP11-328J14.1,RP11-346C20.3,RP11-346C20.4,RP11-384M15.3,RP11-432I5.1,RP11-432I5.2,RP11-432I5.4,RP11-432I5.6,…	HYDIN
SKBR3	0.53	16:74462801-79716800	DEL	5254000	78	AC009132.1,AC009159.1,AC010528.1,AC025284.1,AC025287.1,AC092724.1,ADAMTS18,ADAT1,BCAR1,CFDP1,CHST5,CHST6,CLEC3A,CNTNAP4,CTD-2336H13.2,CTRB1,CTRB2,GABARAPL2,GLG1,KARS,LDHD,MAF,MIR4719,MLKL,MON1B,NUDT7,PIH1,RFWD3,RN7SKP233,RN7SL520P,RNA5SP430,RNA5SP431,RNU6-237P,RNU6-758P,RP11-150D5.2,RP11-190D6.2,RP11-252A24.5,RP11-252A24.7,RP11-252E2.1,RP11-252E2.2,RP11-252K23.1,RP11-252K23.2,RP11-264L1.3,RP11-26…	MAF,WWOX
SKBR3	0.53	17:29210901-31215500	DEL	2004600	57	AC003101.1,AC084809.2,AC090616.2,AC091177.1,AC116407.1,AC116407.2,ADAP2,C17orf75,CDK5R1,COPRS,CTC-542B22.1,CTC-542B22.2,CTD-2370N5.3,EVI2A,EVI2B,LRRC37B,MIR193A,MIR365B,MIR4724,MIR4725,MIR4733,MIR632,MYO1D,OMG,PSMD11,RAB11FIP4,RHOT1,RN7SL138P,RN7SL45P,RN7SL79P,RNA5SP437,RNF135,RNU6-1134P,RNU6ATAC7P,RP1-41C23.1,RP11-142O6.1,RP11-220C2.1,RP11-227G15.2,RP11-227G15.3,RP11-227G15.8,RP11-227G15.9,RP11-…	SUZ12
SKBR3	0.53	17:32064701-34436800	DEL	2372100	87	AC005549.1,AC005549.2,AC005549.3,AC011193.1,AC015849.12,AC015849.13,AC015849.16,AC015849.19,AC015849.2,AC024610.1,AC069363.1,AP2B1,ASIC2,C17orf102,C17orf50,CCL1,CCL11,CCL13,CCL14,CCL15,CCL18,CCL2,CCL23,CCL3,CCL4,CCL5,CCL7,CCL8,CCT6B,CTB-186H2.3,CTC-304I17.2,CTC-304I17.3,CTC-304I17.4,CTC-304I17.5,CTC-507E2.1,FNDC8,GAS2L2,LIG3,LYZL6,MMP28,NLE1,PEX12,RAD51D,RAD51L3-RFFL,RASL10B,RDM1,RFFL,RN7SKP274,R…	CCT6B,RAD51D,TAF15
SKBR3	0.53	17:36406201-37277000	DEL	870800	38	AC006449.1,AC091178.1,AC124789.1,ARHGAP23,C17orf96,C17orf98,CISD3,CTB-58E17.1,CTB-58E17.2,CTB-58E17.3,CTB-58E17.5,CTB-58E17.9,CTD-2206N4.2,CWC25,FBXO47,GPR179,LASP1,LINC00672,MIR4726,MIR4727,MIR4734,MLLT6,MRPL45,PCGF2,PIP4K2B,PLXDC1,PSMB3,RN7SL102P,RN7SL458P,RNA5SP440,RNU6-866P,RP1-56K13.2,RP1-56K13.3,RP1-56K13.5,RPL23,SNORA21,SOCS7,SRCIN1	LASP1,MLLT6
SKBR3	0.53	17:40572201-41379300	DEL	807100	48	AOC2,AOC3,ATP6V0A1,BECN1,BRCA1,CCR10,CNTD1,CNTNAP1,COASY,CTD-3193K9.3,CTD-3193K9.4,CTD-3199J23.4,EZH1,G6PC,HSD17B1,IFI35,LINC00671,LINC00854,MIR5010,MIR548AT,MLX,NAGLU,NBR1,PSMC3IP,PSME3,PTGES3L,PTGES3L-AARSD1,PTRF,RAMP2,RAMP2-AS1,RNU6-287P,RNU7-97P,RNY4P2,RP11-194N12.2,RP11-242D8.1,RP11-376M2.2,RP11-400F19.18,RP11-400F19.6,RP11-400F19.8,RPL27,SNORA40,TMEM106A,TUBG1,TUBG2,VAT1,VPS25,WNK4,Y_RNA	BRCA1
SKBR3	0.52	4:288601-1438140	DEL	1149540	39	AC078852.1,AC078852.2,AC092535.3,AC092574.1,AC092574.2,AC139887.4,CPLX1,CRIPAK,CTBP1,CTBP1-AS2,DGKQ,FGFRL1,IDUA,MAEA,MIR571,MYL5,NKX1-1,PCGF3,PDE6B,PIGG,RN7SL358P,RP11-1191J2.2,RP11-1191J2.4,RP11-1191J2.5,RP11-1263C18.1,RP11-20I20.2,RP11-20I20.4,RP11-2H3.6,RP11-440L14.1,RP11-440L14.3,RP11-440L14.4,RP11-460I19.2,SLC26A1,SNORA48,SPON2,TMEM175,UVSSA,ZNF141,ZNF732	CRIPAK
SKBR3	0.52	4:48059501-48416800	DEL	357300	6	RNU6-838P,RNU6-868P,SLAIN2,TEC,TXK,Y_RNA	TEC
SKBR3	0.52	5:128945024-137397392	DEL	8452368	99	AC004041.2,AC004237.1,AC004769.1,AC004775.5,AC005195.1,AC005355.1,AC005355.2,AC034220.3,AC034228.2,AC034228.3,AC034228.4,AC063976.3,AC116366.5,AC116366.6,ADAMTS19,AFF4,C5orf15,C5orf24,C5orf56,C5orf66,CAMLG,CATSPER3,CCNI2,CDC42SE2,CDKL3,CDKN2AIPNL,CHSY3,CSF2,CTB-113I20.2,CTB-3M24.3,CTB-49A3.2,CTB-49A3.4,CTB-49A3.5,CTC-276P9.1,CTC-276P9.2,CTC-276P9.3,CTC-349C3.2,CTC-350I8.1,CTC-432M15.3,CTC-575N7.1…	AFF4,IL3,IRF1,RAD50
SKBR3	0.52	6:382501-861900	DEL	479400	8	EXOC2,HUS1B,IRF4,RP1-20B11.2,RP11-284J1.1,RP11-532F6.3,RP11-532F6.4,RP11-532F6.5	IRF4
SKBR3	0.52	7:128667701-129149000	DEL	481300	12	AHCYL2,RNU1-72P,RNU7-16P,RP11-286H14.6,RP11-286H14.8,SMKR1,SMO,STRIP2,TNPO3,TSPAN33,Y_RNA,snoU13	SMO
SKBR3	0.52	10:29796191-33278689	DEL	3482498	42	AL161651.1,AL359546.1,AL391839.1,ARHGAP12,C10ORF68,EPC1,ITGB1,KIAA1462,KIF5B,LYZL2,MAP3K8,MIR604,MIR938,MTPAP,RN7SL241P,RN7SL63P,RN7SL825P,RNA5SP309,RNU6-1244P,RNU6-598P,RNU6-908P,RNU7-22P,RP11-135A24.2,RP11-135A24.4,RP11-14C22.3,RP11-14C22.6,RP11-166N17.1,RP11-166N17.3,RP11-192P3.4,RP11-192P3.5,RP11-253D19.1,RP11-253D19.2,RP11-305E6.4,RP11-330O11.3,RP11-462L8.1,RP11-472N13.2,RP11-472N13.3,RP11-4…	KIF5B,MAP3K8
SKBR3	0.52	10:85234401-88964200	DEL	3729800	51	AC091487.1,ADIRF,AGAP11,AL732479.1,BMPR1A,C10orf99,CCSER2,CDHR1,FAM25A,FAM35A,GHITM,GLUD1,GRID1,LDB3,LINC00858,LRIT1,LRIT2,MIR346,MMRN2,NUTM2A-AS1,OPN4,RGR,RN7SKP238,RN7SKP84,RN7SL733P,RNA5SP322,RNU1-19P,RNU1-65P,RNU6-129P,RNU6-325P,RNU6-529P,RNU6-780P,RP11-113E21.1,RP11-181F12.1,RP11-219F10.1,RP11-338I21.1,RP11-344L13.2,RP11-359E3.4,RP11-475D12.1,RP11-475D12.2,RP11-77P6.2,RP11-93H12.2,RP11-93H12…	BMPR1A,GRID1,WAPAL
SKBR3	0.52	10:89194701-97708400	DEL	8513700	96	ACTA2,ACTA2-AS1,AL158040.1,AL161652.1,AL353751.1,AL356214.1,ANKRD1,ANKRD22,ATAD1,BTAF1,CEP55,CH25H,CPEB3,CPEB3_ribozyme,CYP26A1,CYP26C1,EXOC6,FAS,FFAR4,FGFBP3,FRA10AC1,HECTD2,HHEX,HTR7,IDE,IFIT1,IFIT1B,IFIT2,IFIT3,IFIT5,KIF11,KIF20B,KLLN,LGI1,LINC00502,LINC00865,LIPA,LIPF,LIPK,LIPM,LIPN,MARCH5,MINPP1,MIR107,MIR4679-2,NOC3L,PANK1,PAPSS2,PCGF5,PDE6C,PLCE1,PLCE1-AS1,PPP1R3C,PTEN,RBP4,RN7SKP143,RN7SL…	FAS,LIPM,PLCE1,PTEN
SKBR3	0.52	10:100547601-101595200	DEL	1047600	15	ABCC2,CNNM1,COX15,CUTC,ENTPD7,GOT1,HPSE2,NKX2-3,RP11-129J12.1,RP11-129J12.2,RP11-441O15.3,RP11-483F11.7,RP11-85A1.3,SLC25A28,snoU13	ABCC2,HPSE2
SKBR3	0.52	10:110075101-113002700	DEL	2927600	32	ADD3,ADRA2A,AL355512.1,AL355512.2,BBIP1,DUSP5,MIR4680,MIR548E,MXI1,PDCD4,PDCD4-AS1,RBM20,RN7SKP278,RN7SKP288,RN7SL450P,RN7SL686P,RNA5SP327,RNU5B-6P,RNU6-839P,RP11-163F15.1,RP11-313D6.3,RP11-348N5.7,RP11-451M19.3,RP11-525A16.4,RP11-549L6.3,RP11-655H13.2,SHOC2,SMC3,SMNDC1,U4,Y_RNA,snoU13	SHOC2,SMC3,SMNDC1
SKBR3	0.52	17:34807801-36284200	DEL	1476400	36	AATF,AC091199.1,ACACA,C17orf78,CTB-75G16.3,CTC-268N12.2,CTC-268N12.3,CTD-3194G12.1,CTD-3194G12.2,DHRS11,DUSP14,GGNBP2,HNF1B,LHX1,MIR2909,MRM1,MYO19,PIGW,RNA5SP439,RNU6-489P,RP11-115K3.1,RP11-333J10.2,RP11-333J10.3,RP11-378E13.3,RP11-378E13.4,RP11-445F12.1,RP11-445F12.2,RP11-697E22.1,RP11-697E22.2,RP11-697E22.3,SYNRG,TADA2A,TBC1D3F,TBC1D3G,TBC1D3H,ZNHIT3	HNF1B
SKBR3	0.52	18:33240501-35399900	DEL	2159400	20	C18orf21,CELF4,ELP2,FHOD3,GALNT1,MIR187,MIR3929,MIR4318,MOCOS,RP11-49I11.1,RP11-58G13.1,RP11-797E24.3,RP11-873E20.1,RP11-905K4.1,RP11-95O2.1,RP11-95O2.5,RPRD1A,SLC39A6,SNORD112,TPGS2	ELP2
SKBR3	0.51	8:92550279-109780762	DEL	17230483	99	AC016885.1,AC023632.1,AC091096.1,AC105081.1,AC116154.1,AC117834.1,C8orf37,C8orf47,C8orf87,CCNE2,CDH17,CPQ,CTD-2006H14.2,CTD-3239E11.2,DPY19L4,ESRP1,FAM92A1,GDF6,GEM,GS1-5L10.1,HRSP12,INTS8,KB-1000E4.2,KB-1043D8.6,KB-1043D8.8,KB-1047C11.1,KB-1047C11.2,KB-1184D12.1,KB-1205A7.2,KB-1208A12.3,KB-1448A5.1,KB-1458E12.1,KB-1517D11.4,KB-1608C10.2,KB-1958F4.1,KB-1958F4.2,KCNS2,KIAA1429,LAPTM4B,LINC00535,MA…	MTDH,RUNX1T1,TP53INP1
SKBR3	0.5	4:32744801-43289300	DEL	10544500	96	AC021860.1,AC079772.1,AC093786.1,AC098680.1,AC098869.1,AC195454.1,APBB2,ARAP2,C4orf19,CHRNA9,DCAF4L1,DTHD1,FAM114A1,KIAA1239,KLB,KLF3,KLHL5,LIAS,LIMCH1,LINC00682,MIR4801,MIR4802,MIR5591,MIR574,N4BP2,NSUN7,PDS5A,PGM2,PHOX2B,PTTG2,RBM47,RELL1,RFC1,RHOH,RN7SL558P,RNA5SP158,RNA5SP159,RNA5SP160,RNU1-49P,RNU6-1112P,RNU6-1195P,RNU6-32P,RNU6-573P,RNU6-836P,RNU6-887P,RNU7-11P,RNU7-131P,RNU7-74P,RP11-103J1…	N4BP2,PDS5A,PHOX2B,RHOH
SKBR3	0.5	8:137454101-140264200	DEL	2810100	11	COL22A1,CTD-2534J5.1,FAM135B,RNU6-144P,RP11-238K6.1,RP11-238K6.2,RP11-30J20.1,RP11-324F11.1,RP11-431D12.1,RP11-489O18.1,SNORA25	COL22A1,FAM135B
SKBR3	0.5	17:58963101-60648200	DEL	1685100	24	AC018628.1,BRIP1,C17orf82,EFCAB3,INTS2,MED13,METTL2A,NACA2,RN7SL448P,RN7SL800P,RNU7-52P,RP11-136H19.1,RP11-15K2.2,RP11-264B14.1,RP11-264B14.2,RP11-332H18.3,RP11-332H18.4,RP11-332H18.5,RP11-464D20.6,TBX2,TBX4,TLK2,Y_RNA,snoU13	BRIP1,MED13
SKBR3	0.49	18:39359901-42447700	DEL	3087800	10	CTC-782O7.1,LINC00907,PIK3C3,RIT2,RNA5SP454,RNA5SP455,RNU6-443P,RP11-456K23.1,SETBP1,SYT4	PIK3C3,SETBP1
SKBR3	0.48	4:19951701-21161000	DEL	1209300	5	KCNIP4,MIR218-1,RP11-362J17.1,SLIT2,SLIT2-IT1	SLIT2
SKBR3	0.48	4:44977701-48054300	DEL	3076600	22	AC092597.3,AC107068.1,ATP10D,CNGA1,COMMD8,CORIN,COX7B2,GABRA2,GABRA4,GABRB1,GABRG1,NIPAL1,RN7SKP199,RN7SKP215,RNU6-412P,RNU6-931P,RP11-121C2.2,RP11-320H14.1,RP11-362I1.1,RP11-436F23.1,RP11-731J8.2,snoU13	GABRG1
SKBR3	0.44	16:68623101-69978300	DEL	1355200	38	CDH1,CDH3,CHTF8,CIRH1A,COG8,CTD-2033A16.1,CTD-2033A16.3,CYB5B,HAS3,MIR140,MIR1538,NIP7,NOB1,NQO1,PDF,RNA5SP429,RNU6-22P,RNU6-898P,RP11-140H17.1,RP11-311C24.1,RP11-343C2.11,RP11-343C2.12,RP11-343C2.9,RP11-354M1.2,RP11-521L9.1,RP11-521L9.2,RP11-615I2.1,RP11-615I2.2,RP11-70O5.2,SNORA62,SNTB2,TERF2,TMED6,VPS4A,WWP2,Y_RNA,snoU109,snoU13	CDH1
SKBR3	0.36	18:47873701-50613900	DEL	2740200	15	AC090660.1,AC105227.1,DCC,ELAC1,MAPK4,ME2,MEX3C,RN7SL695P,RNU1-46P,RP11-25O3.1,RP11-267C16.1,SKA1,SMAD4,Y_RNA,snoU13	SMAD4
SKBR3	0.27	3:52305732-52697435	DEL	391703	15	BAP1,GLYCTK,GLYCTK-AS1,MIR135A1,NISCH,NT5DC2,PBRM1,PHF7,RNU6-856P,RNU6ATAC16P,SEMA3G,SMIM4,STAB1,TNNC1,WDR82	BAP1,PBRM1
SKBR3	0.27	8:95604701-96223800	DEL	619100	18	CCNE2,DPY19L4,ESRP1,INTS8,KB-1047C11.1,KB-1047C11.2,KB-1608C10.2,MIR3150A,NDUFAF6,PLEKHF2,RNU6-1209P,RP11-22C11.2,RP11-320N21.2,RP11-347C18.3,RP11-347C18.5,TP53INP1,Y_RNA,snoU13	TP53INP1
SKBR3	0.25	8:92572501-94418700	DEL	1846200	21	AC016885.1,AC091096.1,AC117834.1,C8orf87,CTD-3239E11.2,GS1-5L10.1,LINC00535,RN7SKP231,RP11-100L22.1,RP11-100L22.2,RP11-100L22.3,RP11-100L22.4,RP11-122C21.1,RP11-388K12.1,RP11-388K12.2,RP11-587H10.1,RP11-587H10.2,RP11-700E23.1,RP11-700E23.2,RUNX1T1,TRIQK	RUNX1T1
SKBR3	0.25	8:104704101-106379500	DEL	1675400	12	AC012564.1,AP001572.1,AP003471.2,AP003471.3,DCSTAMP,DPYS,LRP12,MIR548A3,RIMS2,RP11-127H5.1,RP11-574O7.1,ZFPM2	RIMS2
SKBR3	0.25	8:108890101-109768700	DEL	878600	6	EMC2,RNA5SP275,RP11-35G22.1,RP11-790J24.1,RSPO2,TMEM74	RSPO2
SKBR3	0.23	9:8622475-8633884	DEL	11409	1	PTPRD	PTPRD
SKBR3	0	5:167080855-167088825	DEL	7970	2	CTB-78F1.1,TENM2	TENM2
SKBR3	0	16:68632570-68856090	DEL	223520	6	CDH1,CDH3,RNA5SP429,RP11-354M1.2,RP11-615I2.2,snoU109	CDH1

## Sheet: 5C
Table S5C: List of copy number alterations identified in the cell line models
SAMPLE	RatioToAverageCoverage	LOCATION	SVTYPE	SVLEN	NumofGenes	GENES	CandidateGene
MDAMB231	3.01	10:34895001-35475500	DUP	580500	9	CREM,CUL2,MIR3611,PARD3,PARD3-AS1,RNU6-193P,RNU6-847P,RNU7-77P,RP11-297A16.2	CUL2
MDAMB231	2.81	10:29484946-37259864	DUP	7774918	79	AL121748.1,AL161651.1,AL359546.1,AL391839.1,ARHGAP12,C10ORF68,CCNY,CREM,CUL2,EPC1,FZD8,GJD4,ITGB1,KIAA1462,KIF5B,LINC00838,LYZL1,LYZL2,MAP3K8,MIR3611,MIR4683,MIR604,MIR938,MTPAP,NAMPTL,NRP1,PARD3,PARD3-AS1,PTCHD3P1,RN7SL241P,RN7SL398P,RN7SL63P,RN7SL825P,RN7SL847P,RNA5SP309,RNU6-1167P,RNU6-1244P,RNU6-193P,RNU6-598P,RNU6-794P,RNU6-847P,RNU6-908P,RNU7-22P,RNU7-77P,RP11-135A24.2,RP11-135A24.4,RP11-14…	CUL2,KIF5B,MAP3K8
MDAMB231	2.63	10:32258901-32462200	DUP	203300	3	KIF5B,RN7SL825P,Y_RNA	KIF5B
MDAMB231	2.6	10:30078301-31246800	DUP	1168500	14	AL161651.1,KIAA1462,LYZL2,MAP3K8,MTPAP,RN7SL241P,RN7SL63P,RNU6-598P,RP11-14C22.3,RP11-14C22.6,RP11-253D19.1,RP11-253D19.2,RP11-305E6.4,RP11-330O11.3	MAP3K8
MDAMB231	2.03	19:58902351-58971976	DUP	69625	10	AC012313.1,CTD-2619J13.13,CTD-2619J13.14,CTD-2619J13.16,CTD-2619J13.17,CTD-2619J13.19,RPS5,ZNF132,ZNF324B,ZNF584	ZNF132
MDAMB231	1.84	5:179179701-179211100	DUP	31400	1	MAML1	MAML1
MDAMB231	1.83	10:28711601-29190400	DUP	478800	13	BAMBI,C10orf126,LINC00837,RN7SKP39,RNA5SP308,RNU4ATAC6P,RNU6-1067P,RNU6-270P,RP11-351M16.3,RP11-478H13.1,RP11-478H13.3,WAC,WAC-AS1	WAC
MDAMB231	1.83	20:29803901-30750800	DUP	946900	36	AL049539.1,AL160175.1,BCL2L1,CCM2L,COX4I2,DEFB115,DEFB116,DEFB118,DEFB119,DEFB121,DEFB123,DEFB124,DUSP15,FOXS1,HCK,HM13,HM13-AS1,HM13-IT1,ID1,LINC00028,MIR3193,MYLK2,PDRG1,REM1,RNA5SP480,RNA5SP481,RNA5SP482,RNU1-94P,RNU6-384P,RP1-310O13.7,RP11-243J16.7,SNORA40,TM9SF4,TPX2,TTLL9,XKR7	BCL2L1,ID1
MDAMB231	1.82	20:43067201-43438900	DUP	371700	12	ADA,C20orf62,KCNK15,PKIG,RIMS4,RP11-445H22.3,RP11-445H22.4,RP5-1013A22.2,SERINC3,TTPAL,WISP2,Z97053.1	ADA
MDAMB231	1.82	20:43439301-43843700	DUP	404400	12	KCNS1,PABPC1L,PI3,RN7SL31P,SEMG1,STK4,STK4-AS1,TOMM34,WFDC12,WFDC5,YWHAB,Y_RNA	YWHAB
MDAMB231	1.81	17:16031101-16048700	DUP	17600	2	NCOR1,RNU6-862P	NCOR1
MDAMB231	1.81	20:35492301-36750600	DUP	1258300	20	BLCAP,CTNNBL1,GHRH,LINC00489,MANBAL,MROH8,NNAT,RBL1,RN7SKP185,RN7SL156P,RN7SL237P,RP4-640H8.2,RPN2,RPRD1B,SAMHD1,SRC,TLDC2,TTI1,VSTM2L,Y_RNA	SRC
MDAMB231	1.8	X:19709801-20317600	DUP	607800	10	CXorf23,EIF1AX,EIF1AX-AS1,MAP7D2,MIR23C,RPS6KA3,SH3KBP1,Y_RNA,snoU2-30,snoU2_19	EIF1AX
MDAMB231	1.78	17:15863901-16030500	DUP	166600	5	AC002553.1,ADORA2B,NCOR1,RNU6-314P,TTC19	NCOR1
MDAMB231	1.78	20:30946601-31172400	DUP	225800	5	ASXL1,C20orf112,RP11-410N8.1,RP11-410N8.3,RP5-1184F4.5	ASXL1
MDAMB231	1.77	17:16946201-17559500	DUP	613300	18	AC055811.1,COPS3,FLCN,MED9,MPRIP,MPRIP-AS1,NT5M,PEMT,PLD6,RASD1,RN7SL775P,RNU6-468P,RNU6-767P,RP11-45M22.3,RP11-45M22.5,RP11-524F11.1,RP11-524F11.2,Y_RNA	FLCN
MDAMB231	1.77	20:39627601-40904800	DUP	1277200	16	CHD6,EMILIN3,LPIN3,PLCG1,PTPRT,RN7SL615P,RNU2-52P,RNU6-1018P,RP1-1J6.2,RP3-511B24.6,RP5-1121H13.3,RP5-1121H13.4,SNORA26,TOP1,Y_RNA,ZHX3	CHD6,PLCG1,TOP1
MDAMB231	1.76	20:49392601-49844900	DUP	452300	10	ADNP,AL034553.1,AL035457.1,AL133228.1,BCAS4,DPM1,KCNG1,MOCS3,RP5-914P20.5,RP5-955M13.4	ADNP
MDAMB231	1.76	20:61305101-61492100	DUP	187000	9	COL9A3,LINC00659,LINC00686,MRGBP,NTSR1,OGFR,OGFR-AS1,RP11-93B14.4,TCFL5	OGFR
MDAMB231	1.75	20:38927501-39625800	DUP	698300	4	MAFB,RNA5SP484,RP4-644L1.2,SNORD112	MAFB
MDAMB231	1.75	X:15042401-15852200	DUP	809800	13	ACE2,AP1S2,ASB11,ASB9,BMX,CA5B,FIGF,GS1-594A7.3,PIGA,PIR,SNORA7,TMEM27,ZRSR2	ZRSR2
MDAMB231	1.74	14:20706801-21536200	DUP	829400	51	AL161668.5,AL163636.6,ANG,APEX1,CCNB1IP1,CTD-2292M16.7,CTD-2292M16.8,EDDM3A,EDDM3B,KLHL33,METTL17,NDRG2,OR11H4,OR6S1,OSGEP,PARP2,PNP,RN7SL189P,RNA5SP382,RNASE1,RNASE10,RNASE11,RNASE12,RNASE13,RNASE2,RNASE3,RNASE4,RNASE6,RNASE7,RNASE8,RNASE9,RP11-14J7.6,RP11-203M5.2,RP11-203M5.7,RP11-203M5.8,RP11-219E7.1,RP11-219E7.2,RP11-219E7.3,RP11-219E7.4,RP11-84C10.2,RP11-84C10.3,RP11-84C10.4,RP11-903H12.3,RP…	PNP
MDAMB231	1.74	17:18971001-19571900	DUP	600900	35	AC004448.2,AC004448.5,AC007952.1,AC007952.4,AC007952.5,AC007952.6,AC106017.1,ALDH3A2,B9D1,CTB-187M2.1,CTB-187M2.2,CTB-187M2.3,CTC-457L16.2,EPN2,EPN2-AS1,GRAPL,MAPK7,MFAP4,MIR1180,RNF112,RP11-1113L8.1,RP11-135L13.4,RP11-160E2.11,RP11-160E2.16,RP11-160E2.17,RP11-160E2.19,RP11-160E2.21,SLC47A1,SNORA31,SNORA59B,SNORD3A,SNORD3C,SNORD3D,Y_RNA,snoMe28S-Am2634	MAPK7
MDAMB231	1.74	20:57268801-57463700	DUP	194900	10	GNAS,GNAS-AS1,MIR296,MIR298,NPEPL1,RP1-309F20.3,RP1-309F20.4,RP11-261P9.4,RP4-806M20.3,RP4-806M20.5	GNAS
MDAMB231	1.74	20:62258401-62370900	DUP	112500	8	ARFRP1,CTD-3184A7.4,LIME1,RP4-583P15.14,RTEL1,STMN3,TNFRSF6B,ZGPAT	ARFRP1
MDAMB231	1.73	17:7788601-8171100	DUP	382500	27	AC025335.1,AC129492.1,AC129492.6,ALOX12B,ALOX15B,ALOXE3,AURKB,C17orf59,CHD3,CNTROB,GUCY2D,HES7,KCNAB3,LINC00324,MIR4314,PER1,PFAS,RP11-599B13.3,RP11-599B13.6,RP11-599B13.7,RP11-849F2.8,SCARNA21,SNORD118,TMEM107,TRAPPC1,VAMP2,snoU13	AURKB,PER1
MDAMB231	1.73	17:16048901-16505500	DUP	456600	11	FAM211A-AS1,MIR1288,NCOR1,RN7SL442P,RP1-77H15.1,RP11-138I1.2,RP11-138I1.3,RP11-138I1.4,TRPV2,UBB,ZNF287	NCOR1
MDAMB231	1.73	20:45463901-46413900	DUP	950000	17	AL021394.1,AL031666.1,AL031666.2,CTD-2653D5.1,EYA2,MIR3616,NCOA3,RN7SKP33,RN7SL243P,RNU6-497P,RNU6-563P,RP1-148H17.1,RP11-323C15.2,RP4-569M23.2,RP4-569M23.4,SULF2,ZMYND8	NCOA3
MDAMB231	1.72	20:54857601-55587400	DUP	729800	19	AL117380.2,AL121914.1,AL133232.1,AURKA,CASS4,FAM209A,FAM209B,FAM210B,GCNT7,RN7SL170P,RNU6-1146P,RNU6-929P,RP11-380D15.3,RP5-843L14.1,RP5-897D18.1,RTFDC1,TFAP2C,U3,snoU13	AURKA
MDAMB231	1.71	1:161414301-161558800	DUP	144500	6	FCGR2A,FCGR2B,FCGR3A,HSPA6,RP11-25K21.6,RP11-5K23.5	FCGR2B
MDAMB231	1.71	14:21536401-21952300	DUP	415900	17	ARHGEF40,CHD8,HNRNPC,OR5AU1,RAB2B,RN7SL650P,RNU6-252P,RP11-524O1.4,RP11-998D10.4,RP11-998D10.7,RPGRIP1,SNORD8,SNORD9,SUPT16H,TMEM253,TOX4,ZNF219	CHD8
MDAMB231	1.71	17:4901601-5587700	DUP	686100	23	AC012146.7,AC109333.10,C1QBP,CTC-524C5.2,CTC-524C5.5,DERL2,DHX33,KIF1C,MIS12,NUP88,RABEP1,RNU7-31P,RP11-333E1.1,RP11-333E1.2,RP11-420A6.2,RP11-46I8.3,RPAIN,SCIMP,SLC52A1,USP6,ZFP3,ZNF232,ZNF594	RABEP1,USP6
MDAMB231	1.71	20:61725601-62103500	DUP	377900	17	ARFGAP1,BIRC7,CHRNA4,COL20A1,HAR1A,HAR1B,KCNQ2,MIR124-3,MIR3196,MIR4326,NKAIN4,RNU6-994P,RP11-261N11.8,RP11-358D14.2,RP5-963E22.4,RP5-963E22.5,YTHDF1	BIRC7
MDAMB231	1.7	7:142367701-142475300	DUP	107600	6	MTRNR2L6,PRSS1,TRBV25-1,TRBV27,TRBV28,TRBV29-1	PRSS1
MDAMB231	1.7	17:5745301-7698900	DUP	1953600	86	AC007421.1,AC040977.1,AC113189.5,ACADVL,ACAP1,AIPL1,ALOX12,ASGR1,ASGR2,ATP1B2,BCL6B,C17orf100,C17orf49,C17orf74,CD68,CHRNB1,CLDN7,CLEC10A,CTC-281F24.1,CTDNEP1,DNAH2,DVL2,EFNB3,EIF5A,ELP5,FAM64A,FBXO39,FGF11,FXR2,GABARAP,GPS2,KCTD11,KIAA0753,MED31,MIR324,MIR4520A,MIR497HG,MPDU1,NEURL4,NLGN2,PHF23,PITPNM3,POLR2A,RNA5SP435,RNASEK,RNU6-1264P,RP1-4G17.2,RP11-104H15.10,RP11-104H15.7,RP11-104H15.8,RP11-…	TP53
MDAMB231	1.7	X:24669901-25228800	DUP	558900	8	AC004655.1,AC112778.1,ARX,PCYT1B,PCYT1B-AS1,POLA1,RN7SL91P,SCARNA23	POLA1
MDAMB231	1.69	8:61593301-61979700	DUP	386400	5	AC022182.1,AC022182.3,CHD7,CLVS1,RP11-33I11.2	CHD7
MDAMB231	1.69	20:62104401-62258100	DUP	153700	8	C20orf195,EEF1A2,GMEB2,HELZ2,PPDPF,PTK6,RP4-697K14.3,SRMS	EEF1A2,PTK6
MDAMB231	1.68	20:57467601-57556100	DUP	88500	1	GNAS	GNAS
MDAMB231	1.67	5:178900316-179211083	DUP	310767	9	AC136604.1,CANX,CBY3,HNRNPH1,MAML1,RP11-1379J22.2,RP11-1379J22.5,RP11-798K23.4,RUFY1	MAML1
MDAMB231	1.67	5:179098701-179179000	DUP	80300	3	CANX,CBY3,MAML1	MAML1
MDAMB231	1.67	X:14420601-15040500	DUP	619900	4	AC003658.1,FANCB,GLRA2,MOSPD2	FANCB
MDAMB231	1.66	6:73916001-74613300	DUP	697300	22	AC019205.1,AC019205.2,AL603910.1,CD109,DDX43,DPPA5,EEF1A1,KHDC1,KHDC1L,KHDC3L,MB21D1,MTO1,Metazoa_SRP,OOEP,OOEP-AS1,RNU6-975P,RP11-398K22.12,RP11-505P4.6,RP11-505P4.7,RP11-553A21.3,SLC17A5,snoU13	MTO1
MDAMB231	1.64	2:61697801-63047800	DUP	1350000	19	AC016727.1,AC018462.2,AC092155.4,AC093159.1,AC107081.5,B3GNT2,CCT4,COMMD1,EHBP1,MIR5192,RN7SL18P,RN7SL51P,RNU6-1145P,RP11-355B11.2,TMEM17,USP34,XPO1,Y_RNA,snoU13	XPO1
MDAMB231	1.64	8:48228801-51375400	DUP	3146600	29	AC026904.1,AC103686.1,C8orf22,CEBPD,EFCAB1,MCM4,PRKDC,RN7SKP294,RNU6-295P,RNU6-519P,RNU6-665P,RP11-109P6.2,RP11-10H3.1,RP11-401N18.1,RP11-567J20.1,RP11-567J20.2,RP11-567J20.3,RP11-697N18.4,RP11-738G5.1,RP11-738G5.2,RP11-759A9.1,RP11-770E5.1,RP11-770E5.2,RP11-770E5.3,SNAI2,SNTG1,SPIDR,UBE2V2,Y_RNA	PRKDC
MDAMB231	1.64	20:51246801-52310200	DUP	1063400	17	AC005808.3,AL050316.1,AL354993.1,RN7SKP184,RNU7-14P,RP11-15M15.1,RP11-15M15.2,RP11-80K6.2,RP4-669H2.1,RP4-678D15.1,RP4-715N11.2,RP4-723E3.1,RP4-724E16.2,RP5-823G15.5,TSHZ2,Y_RNA,ZNF217	TSHZ2,ZNF217
MDAMB231	1.63	10:26654401-27224200	DUP	569800	14	ABI1,APBB1IP,LINC00202-1,LINC00202-2,LINC00264,PDSS1,RNA5SP307,RNU6-946P,RP11-128B16.3,RP13-16H11.2,RP13-16H11.5,RP13-16H11.7,SNORA57,snoU13	ABI1
MDAMB231	1.62	8:141646401-142318200	DUP	671800	10	DENND3,MIR151A,PTK2,RNA5SP278,RP11-10J21.3,RP11-10J21.4,RP11-10J21.5,RP11-128L5.1,RP11-809O17.1,SLC45A4	PTK2
MDAMB231	1.61	2:60585984-88179039	DUP	27593055	99	AC007098.1,AC007365.1,AC007365.2,AC007365.3,AC007381.2,AC007386.2,AC007386.4,AC007389.3,AC007389.4,AC007392.3,AC007392.4,AC007403.2,AC007880.1,AC008074.3,AC008074.4,AC009501.4,AC009970.1,AC010733.4,AC012368.1,AC012370.2,AC012370.3,AC016727.1,AC016747.3,AC018462.2,AC074289.1,AC074391.1,AC074391.2,AC092155.4,AC092669.1,AC092669.2,AC092669.3,AC092669.6,AC093159.1,AC096664.3,AC107081.5,AC114752.1,AC1…	BCL11A,REL,XPO1
MDAMB231	1.61	6:170576701-170767500	DUP	190800	7	DLL1,FAM120B,MIR4644,RP1-140C12.2,RP5-894D12.3,RP5-894D12.4,RP5-894D12.5	DLL1
MDAMB231	1.61	6:170769301-170941400	DUP	172100	3	PDCD2,PSMB1,TBP	PSMB1
MDAMB231	1.61	8:54861901-55467500	DUP	605600	10	LYPLA1,MRPL15,RGS20,RN7SL250P,RNU105C,RNU6ATAC32P,RP11-30L15.6,RP11-53M11.3,SOX17,TCEA1	SOX17
MDAMB231	1.61	17:9740601-10101700	DUP	361100	5	AC000003.1,AC000003.2,GAS7,GLP2R,RCVRN	GAS7
MDAMB231	1.6	6:11094701-11556100	DUP	461400	8	ERVFRD-1,NEDD9,RNU1-64P,RP11-716O23.1,RP11-716O23.2,RP3-510L9.1,SMIM13,TMEM170B	NEDD9
MDAMB231	1.6	7:142486301-142602900	DUP	116600	13	EPHB6,RP11-114L10.2,TRBC2,TRBJ2-1,TRBJ2-2,TRBJ2-2P,TRBJ2-3,TRBJ2-4,TRBJ2-5,TRBJ2-6,TRBJ2-7,TRBV30,TRPV6	EPHB6
MDAMB231	1.6	10:26365201-26651500	DUP	286300	2	GAD2,MYO3A	MYO3A
MDAMB231	1.6	17:11908601-12345500	DUP	436900	4	MAP2K4,MIR744,RNU11-2P,RP11-471L13.2	MAP2K4
MDAMB231	1.59	6:166702701-167488100	DUP	785400	14	FGFR1OP,MIR1913,MIR3939,MPC1,PRR18,RNASET2,RP1-167A14.2,RP1-168L15.5,RP11-514O12.4,RPS6KA2,RPS6KA2-AS1,RPS6KA2-IT1,SFT2D1,Z98049.1	FGFR1OP
MDAMB231	1.59	8:81786701-82367500	DUP	580800	10	FABP5,PAG1,PMP2,RP11-1149M10.1,RP11-1149M10.2,RP11-157I4.4,RP11-172E10.1,RP11-363E6.3,RP11-363E6.4,ZNF704	FABP5,PAG1
MDAMB231	1.59	8:118110401-119123800	DUP	1013400	6	EXT1,MED30,RN7SL826P,RP11-654G14.1,SLC30A8,SNORA31	EXT1
MDAMB231	1.59	8:123604601-124001600	DUP	397000	9	AC016405.2,LINC01151,RP11-44N11.1,RP11-44N11.2,RP11-44N11.3,RP11-557C18.4,RP11-973F15.2,ZHX2,snoU13	ZHX2
MDAMB231	1.58	6:74620401-76375700	DUP	1755300	18	AL590684.1,COL12A1,COX7A2,FILIP1,MIR4463,RN7SKP163,RNU1-34P,RNU6-1016P,RNU6-1338P,RP1-234P15.4,RP11-415D17.3,RP11-415D17.4,RP11-554D15.1,RP11-554D15.3,RP11-554D15.4,SENP6,TMEM30A,U3	TMEM30A
MDAMB231	1.58	8:124083101-124400900	DUP	317800	13	C8orf76,FAM83A,FAM83A-AS1,MIR4663,MIR548D1,RNU6-628P,RNU6-875P,RP11-539E17.5,TBC1D31,U3,ZHX1,ZHX1-C8ORF76,snoU13	FAM83A
MDAMB231	1.57	6:168228501-168717000	DUP	488500	11	DACT2,FRMD1,KIF25,KIF25-AS1,MLLT4,RP11-503C24.1,RP11-503C24.2,RP11-503C24.3,RP11-503C24.4,RP11-503C24.6,RP3-470B24.5	MLLT4
MDAMB231	1.57	8:56667701-57758200	DUP	1090500	22	AC018607.1,CHCHD7,CTA-397H3.3,LINC00968,LYN,MOS,PENK,PLAG1,RN7SL323P,RN7SL798P,RP11-140I16.3,RP11-17A4.2,RP11-17A4.3,RP11-17A4.4,RP11-318K15.2,RP11-446E9.2,RPS20,SDR16C5,SNORA1,SNORA3,SNORD54,TGS1	LYN,PLAG1
MDAMB231	1.57	8:101128001-102094200	DUP	966200	23	ANKRD46,AP001205.1,FBXO43,KB-1083B1.1,KB-1615E4.2,KB-1615E4.3,KB-173C10.1,KB-173C10.2,KB-1991G8.1,MIR4471,PABPC1,POLR2K,RN7SL685P,RNF19A,RNU4-83P,RNU6-1092P,RNU6ATAC41P,RP11-302J23.1,RP11-521I2.3,SNX31,SPAG1,YWHAZ,Y_RNA	SNX31,YWHAZ
MDAMB231	1.57	8:127998101-129375100	DUP	1377000	17	CASC11,CASC19,CASC8,CCAT1,MIR1205,MIR1207,MIR1208,MYC,PCAT1,PCAT2,POU5F1B,PVT1,RN7SKP226,RNU1-106P,RNU4-25P,RP11-382A18.2,TMEM75	MYC
MDAMB231	1.56	8:133647301-134325200	DUP	677900	8	AF216667.1,AF230666.2,CTC-137K3.1,LRRC6,NDRG1,SLA,TMEM71,WISP1-OT1	NDRG1
MDAMB231	1.55	8:79600401-81785800	DUP	2185400	29	AC009941.1,HEY1,IL7,MIR5708,MRPS28,RN7SL107P,RN7SL308P,RN7SL41P,RNU11-6P,RNU2-71P,RNU6-1213P,RNU7-85P,RP11-1114I9.1,RP11-26J3.1,RP11-26J3.3,RP11-27N21.3,RP11-48B3.3,RP11-48B3.4,RP11-79H23.3,RP11-92K15.1,RP11-92K15.3,RP11-941H19.3,SNORA20,STMN2,TPD52,Y_RNA,ZBTB10,ZC2HC1A,ZNF704	HEY1,MRPS28
MDAMB231	1.55	8:90827101-91006400	DUP	179300	3	NBN,OSGIN2,RNU6-925P	NBN
MDAMB231	1.54	17:25438401-26081100	DUP	642700	11	KSR1,LGALS9,MIR4522,RN7SL576P,RP11-173M1.4,RP11-173M1.8,RP11-19P22.5,RP11-19P22.8,RP11-663N22.1,RP11-720N19.2,WSB1	WSB1
MDAMB231	1.53	8:70900701-71583600	DUP	682900	12	AC120194.1,LACTB2,Metazoa_SRP,NCOA2,PRDM14,RN7SL19P,RNU1-101P,RP11-333A23.4,RP11-382J12.1,TRAM1,Y_RNA,snoU13	NCOA2
MDAMB231	1.53	8:102817001-103993100	DUP	1176100	21	AP003354.1,AP003356.1,AZIN1,KB-1254G8.1,KB-1507C5.2,KB-1507C5.3,KB-1507C5.4,KB-1732A1.1,KB-1980E6.3,KB-431C1.4,KB-431C1.5,KLF10,MIR5680,NCALD,ODF1,RNU6-1224P,RNU6ATAC8P,RRM2B,UBR5,Y_RNA,snoU13	RRM2B
MDAMB231	1.53	8:119482101-120510100	DUP	1028000	10	COLEC10,MAL2,NOV,RNU6-12P,RP11-278I4.2,RP11-4K16.2,RP11-775B15.2,SAMD12,SNORA32,TNFRSF11B	NOV
MDAMB231	1.52	8:95568801-97520200	DUP	1951400	33	AC116154.1,C8orf37,CCNE2,DPY19L4,ESRP1,GDF6,INTS8,KB-1043D8.6,KB-1043D8.8,KB-1047C11.1,KB-1047C11.2,KB-1448A5.1,KB-1608C10.2,MIR3150A,MTERFD1,NDUFAF6,PLEKHF2,PTDSS1,RNU6-1172P,RNU6-1209P,RNU6-690P,RP11-22C11.2,RP11-267M23.4,RP11-31K23.2,RP11-320N21.2,RP11-347C18.3,RP11-347C18.5,RP11-90D11.1,SDC2,TP53INP1,UQCRB,Y_RNA,snoU13	TP53INP1
MDAMB231	1.52	8:97783401-98744300	DUP	960900	7	CPQ,KB-1000E4.2,KB-1958F4.1,KB-1958F4.2,MTDH,TSPYL5,U3	MTDH
MDAMB231	1.52	8:117286801-118109700	DUP	822900	11	AARD,AF130343.1,EIF3H,LINC00536,MIR3610,RAD21,RAD21-AS1,RN7SL228P,RP11-536K17.1,SLC30A8,UTP23	RAD21
MDAMB231	1.52	10:26307201-26363300	DUP	56100	1	MYO3A	MYO3A
MDAMB231	1.52	11:161801-263600	DUP	101800	8	BET1L,ODF3,PSMD13,RIC8A,RP11-304M2.3,RP11-304M2.5,SCGB1C1,SIRT3	SIRT3
MDAMB231	1.51	2:61308969-103838528	DUP	42529559	99	AC007098.1,AC007365.1,AC007365.2,AC007365.3,AC007386.2,AC007386.4,AC007389.3,AC007389.4,AC007392.3,AC007392.4,AC007403.1,AC007403.2,AC007403.3,AC007422.1,AC007880.1,AC008074.3,AC008074.4,AC009501.4,AC010987.5,AC010987.6,AC012368.1,AC012370.2,AC012370.3,AC016727.1,AC016747.3,AC018462.2,AC023115.1,AC023115.2,AC023115.4,AC074289.1,AC074391.1,AC074391.2,AC078941.1,AC092155.4,AC092669.1,AC092669.2,AC0…	XPO1
MDAMB231	1.51	8:103149640-103333837	DUP	184197	4	KB-431C1.4,KB-431C1.5,RRM2B,UBR5	RRM2B
MDAMB231	1.51	8:142358301-142745900	DUP	387600	7	AC138647.1,CTD-3064M3.3,CTD-3064M3.4,CTD-3064M3.7,GPR20,PTP4A3,SNORD5	PTP4A3
MDAMB231	1.51	8:144405001-144511200	DUP	106200	7	MAFA,RHPN1,RHPN1-AS1,RNU6-220P,RP11-909N17.2,RP11-909N17.3,TOP1MT	MAFA
MDAMB231	1.5	8:68316101-69108500	DUP	792400	4	AC022861.1,PREX2,RP11-396J6.1,RP11-403D15.2	PREX2
MDAMB231	1.49	8:72652901-73949000	DUP	1296100	15	AC104012.1,KCNB2,MSC,RNA5SP271,RNU6-285P,RP11-1145L24.1,RP11-142A23.1,RP11-281N10.1,RP11-313C15.1,RP11-351E7.1,RP11-383H13.1,RP11-531A24.3,TERF1,TRPA1,U8	KCNB2
MDAMB231	1.49	8:143592701-143841400	DUP	248700	12	AC145123.2,AP006547.3,ARC,BAI1,CTD-2292P10.2,CTD-2292P10.4,JRK,LY6K,LYPD2,PSCA,SLURP1,THEM6	BAI1
MDAMB231	1.49	8:144834101-145187500	DUP	353400	19	AC105049.1,CTD-3065J16.6,CTD-3065J16.9,CYC1,EPPK1,EXOSC4,GRINA,MAF1,MIR661,MIR937,OPLAH,PLEC,PUF60,RP11-299M14.2,RP11-429J17.7,RP11-429J17.8,SCRIB,SHARPIN,SPATC1	CYC1,EPPK1
MDAMB231	1.48	8:103997001-105558800	DUP	1561800	28	AP001572.1,AP003471.2,AP003471.3,AP003550.1,ATP6V1C1,BAALC,C8orf56,CTHRC1,DCAF13,DCSTAMP,DPYS,FZD6,KB-1507C5.4,KB-1639H6.2,KB-1639H6.4,LRP12,MIR3151,MIR548A3,RIMS2,RNU6-1011P,RP11-1C8.4,RP11-1C8.5,RP11-1C8.6,RP11-1C8.7,RP11-318M2.2,RP11-318M2.3,SLC25A32,snoU13	RIMS2
MDAMB231	1.48	8:143495701-143531000	DUP	35300	1	BAI1	BAI1
MDAMB231	1.47	8:69110401-69608200	DUP	497800	5	C8orf34,PREX2,RNA5SP269,RP11-664D7.4,Y_RNA	PREX2
MDAMB231	1.47	8:145562001-145850200	DUP	288200	21	AC084125.3,AC084125.4,ADCK5,ARHGAP39,C8orf82,CTD-2517M22.16,CTD-2517M22.17,CTD-2517M22.9,FOXH1,GPT,GS1-393G12.14,KIFC2,LRRC14,LRRC24,MFSD3,MIR1234,MIR939,RECQL4,SLC39A4,SLC52A2,VPS28	RECQL4
MDAMB231	1.44	1:85462301-86219900	DUP	757600	18	AL590113.1,BCL10,C1orf52,COL24A1,CYR61,DDAH1,MCOLN2,MCOLN3,MIR4423,RP11-131L23.1,RP11-131L23.2,RP11-290M5.2,RP11-290M5.4,SNORD81,SYDE2,WDR63,Y_RNA,ZNHIT6	BCL10
MDAMB231	1.44	2:69984701-70432200	DUP	447500	13	AC016700.2,AC016700.5,AC019206.1,ANXA4,ASPRV1,C2orf42,GMCL1,MXD1,PCBP1,PCBP1-AS1,RN7SL470P,SNRNP27,snoU13	PCBP1
MDAMB231	1.43	1:110244601-110462300	DUP	217700	10	CSF1,EPS8L3,GSTM1,GSTM2,GSTM3,GSTM5,RP11-195M16.1,RP11-195M16.3,RP4-735C1.4,RP4-735C1.6	CSF1,GSTM1
MDAMB231	1.43	8:108564201-109958900	DUP	1394700	7	EMC2,RNA5SP275,RP11-1084E5.1,RP11-35G22.1,RP11-790J24.1,RSPO2,TMEM74	RSPO2
MDAMB231	1.43	8:139547001-140714900	DUP	1167900	5	COL22A1,CTD-2534J5.1,RP11-324F11.1,RP11-398H6.1,SNORA25	COL22A1
MDAMB231	1.42	1:59197401-59516800	DUP	319400	7	AL136985.1,JUN,LINC01135,RP11-63G10.2,RP11-63G10.3,RP4-794H19.1,RP4-794H19.4	JUN
MDAMB231	1.42	6:35754601-37011900	DUP	1257300	32	BRPF3,C6orf222,C6orf89,CDKN1A,CLPS,CLPSL1,CPNE5,ETV7,KCTD20,LHFPL5,MAPK13,MAPK14,MIR3925,MTCH1,PI16,PNPLA1,PPIL1,PXT1,RAB44,RN7SL502P,RN7SL748P,RNU1-88P,RP1-179N16.6,RP1-50J22.4,RP1-90K10.4,SLC26A8,SRPK1,SRSF3,STK38,Y_RNA,Z85986.1,Z95152.1	CDKN1A,MAPK13,MAPK14,SRSF3
MDAMB231	1.41	1:120166301-120583500	DUP	417200	7	ADAM30,HMGCS2,NOTCH2,PHGDH,REG4,RP5-1042I8.7,ZNF697	NOTCH2,PHGDH,REG4
MDAMB231	1.41	1:162711301-162729900	DUP	18600	1	DDR2	DDR2
MDAMB231	1.41	6:34885701-35624300	DUP	738600	14	AL138721.1,ANKS1A,DEF6,FANCE,FKBP5,PPARD,RP3-329A5.8,RP3-340B19.3,RPL10A,SCUBE3,SNORA40,TCP11,TEAD3,TULP1	FANCE
MDAMB231	1.41	8:109959601-111260300	DUP	1300700	12	EBAG9,KCNV1,NUDCD1,PKHD1L1,RNU2-67P,RP11-1084E5.1,RP11-122A21.2,RP11-422N16.3,RP11-696P8.2,SNORD112,SYBU,TRHR	PKHD1L1
MDAMB231	1.41	8:139439901-139509100	DUP	69200	1	FAM135B	FAM135B
MDAMB231	1.41	10:81092801-81401100	DUP	308300	9	AL133481.1,EIF5AL1,PPIF,RP11-342M3.1,RP11-342M3.5,RP11-589B3.6,SFTPA1,SFTPA2,ZCCHC24	SFTPA1
MDAMB231	1.41	11:34709201-35763900	DUP	1054700	15	AL356215.1,CD44,FJX1,MIR1343,PAMR1,PDHX,RP1-276E15.1,RP1-68D18.2,RP1-68D18.3,RP1-68D18.4,RP4-607I7.1,RP4-683L5.1,RP5-945I17.2,SLC1A2,TRIM44	SLC1A2
MDAMB231	1.41	12:124458101-124566000	DUP	107900	2	FAM101A,ZNF664	FAM101A
MDAMB231	1.4	6:34885705-38449459	DUP	3563754	72	AL031905.1,AL138721.1,AL157823.1,ANKS1A,ARMC12,BRPF3,BTBD9,C6orf222,C6orf89,CCDC167,CDKN1A,CLPS,CLPSL1,CLPSL2,CMTR1,COX6A1P2,CPNE5,DEF6,ETV7,FANCE,FKBP5,KCTD20,LHFPL5,MAPK13,MAPK14,MDGA1,MIR3925,MIR4462,MIR5690,MTCH1,PI16,PIM1,PNPLA1,PPARD,PPIL1,PXT1,RAB44,RN7SL273P,RN7SL285P,RN7SL502P,RN7SL748P,RNF8,RNU1-87P,RNU1-88P,RP1-153P14.5,RP1-153P14.8,RP1-179N16.6,RP1-50J22.4,RP1-90K10.4,RP3-329A5.8,RP3-…	CDKN1A,FANCE,MAPK13,MAPK14,PIM1,SRSF3
MDAMB231	1.4	8:113538401-113650100	DUP	111700	2	CSMD3,snoU13	CSMD3
MDAMB231	1.4	8:143534701-143591800	DUP	57100	1	BAI1	BAI1
MDAMB231	1.4	14:61213901-62526300	DUP	1312400	19	CTD-2277K2.1,HIF1A,HIF1A-AS1,HIF1A-AS2,MNAT1,PRKCH,RNU6-398P,RP11-193F5.1,RP11-47I22.1,RP11-47I22.2,RP11-47I22.4,RP11-618G20.1,RP11-902B17.1,SLC38A6,SNAPC1,SNORD112,SYT16,TMEM30B,TRMT5	HIF1A
MDAMB231	1.4	17:48163701-48427500	DUP	263800	16	AC002401.1,COL1A1,PDK2,PPP1R9B,RP11-893F2.13,RP11-893F2.14,RP11-893F2.15,RP11-893F2.5,RP11-893F2.6,RP11-893F2.9,RP5-875H18.4,SAMD14,SGCA,TMEM92,XYLT2,snoU13	COL1A1
MDAMB231	1.39	1:110463001-111014400	DUP	551400	20	AHCYL1,ALX3,CSF1,KCNC4-AS1,LAMTOR5,LAMTOR5-AS1,PROK1,RBM15,RP11-470L19.5,RP4-773N10.4,RP4-773N10.6,RP5-1028L10.1,RP5-1028L10.2,RP5-1074L1.1,RP5-1074L1.4,SLC16A4,SLC6A17,SNORA25,STRIP1,UBL4B	CSF1,RBM15
MDAMB231	1.39	8:139078801-139438000	DUP	359200	3	FAM135B,RP11-238K6.1,RP11-489O18.1	FAM135B
MDAMB231	1.39	10:32879588-103200194	DUP	70320606	97	AL022344.4,AL022344.5,AL022344.7,AL031601.1,AL117337.1,AL121748.1,AL135791.1,ANKRD30A,BMS1,CCNY,CREM,CSGALNACT2,CUL2,FXYD4,FZD8,GJD4,HNRNPF,ITGB1,LINC00838,LINC00839,LINC00993,LINC00999,MIR3611,MIR4683,MIR5100,MTRNR2L7,NAMPTL,NRP1,PARD3,PARD3-AS1,RASGEF1A,RET,RN7SL314P,RN7SL398P,RN7SL847P,RNU6-1118P,RNU6-1167P,RNU6-1170P,RNU6-193P,RNU6-794P,RNU6-795P,RNU6-811P,RNU6-847P,RNU6-885P,RNU6ATAC11P,RNU7…	CUL2,RASGEF1A,RET
MDAMB231	1.39	10:81003401-81092200	DUP	88800	1	ZMIZ1	ZMIZ1
MDAMB231	1.39	10:101295501-101851900	DUP	556400	12	ABCC2,COX15,CPN1,CUTC,DNMBP,DNMBP-AS1,ENTPD7,NKX2-3,RP11-483F11.7,RP11-85A1.3,SLC25A28,snoU13	ABCC2
MDAMB231	1.39	11:27590401-28038700	DUP	448300	5	BDNF,BDNF-AS,LINC00678,RP11-406D1.2,RP11-587D21.4	BDNF
MDAMB231	1.39	12:124569601-124586100	DUP	16500	2	FAM101A,RP11-214K3.24	FAM101A
MDAMB231	1.39	12:124621001-124779300	DUP	158300	2	FAM101A,RP11-522N14.2	FAM101A
MDAMB231	1.39	12:124923601-124992300	DUP	68700	1	NCOR2	NCOR2
MDAMB231	1.39	14:22882201-23750600	DUP	868400	100	ABHD4,AE000661.37,AE000661.50,AE000662.92,AE000662.93,AJUBA,AL132780.1,AL135998.1,C14orf93,CDH24,CTD-2555K7.2,CTD-2555K7.4,DAD1,HAUS4,LRP10,MIR4707,MMP14,OR6J1,OXA1L,PRMT5,PRMT5-AS1,PSMB11,PSMB5,RBM23,REM2,RP11-298I3.1,RP11-298I3.4,RP11-298I3.5,SLC7A7,SNORA73,SNORD41,TRAC,TRAJ1,TRAJ10,TRAJ11,TRAJ12,TRAJ13,TRAJ14,TRAJ16,TRAJ17,TRAJ18,TRAJ19,TRAJ2,TRAJ20,TRAJ21,TRAJ22,TRAJ23,TRAJ24,TRAJ25,TRAJ26,TR…	AJUBA,PRMT5,PSMB5
MDAMB231	1.39	17:41119801-41517000	DUP	397200	17	ARL4D,BRCA1,CTD-3199J23.4,IFI35,LINC00854,LINC00910,NBR1,PTGES3L,PTGES3L-AARSD1,RNU6-1137P,RNU6-470P,RP11-242D8.1,RP11-376M2.2,RPL27,TMEM106A,VAT1,Y_RNA	BRCA1
MDAMB231	1.39	17:61637301-61777200	DUP	139900	5	DCAF7,LIMD2,MAP3K3,RNU6-288P,TACO1	MAP3K3
MDAMB231	1.38	1:43563001-44382900	DUP	819900	21	C1orf210,CDC20,EBNA1BP2,ELOVL1,FAM183A,HYI-AS1,KDM4A,KDM4A-AS1,MED8,MPL,PTPRF,RNA5SP46,RNU6-1058P,RP1-92O14.3,RP1-92O14.6,RP11-184I16.4,SZT2,SZT2-AS1,TIE1,TMEM125,WDR65	MPL,TIE1
MDAMB231	1.38	1:119964301-120165700	DUP	201400	4	HSD3B1,HSD3B2,LINC00622,ZNF697	HSD3B1
MDAMB231	1.38	1:162560001-162696500	DUP	136500	3	DDR2,RP11-359K18.4,UAP1	DDR2
MDAMB231	1.38	2:96012601-97128300	DUP	1115700	21	AC008268.1,AC012307.2,AC021188.4,ADRA2B,ANKRD36C,ASTL,CIAO1,DUSP2,FAHD2A,ITPRIPL1,KCNIP3,LINC00342,NCAPH,RN7SL210P,RP11-440D17.3,RP11-440D17.4,SNRNP200,STARD7,STARD7-AS1,TMEM127,TRIM43	DUSP2,TMEM127
MDAMB231	1.38	5:33850101-34091700	DUP	241600	6	ADAMTS12,AMACR,C1QTNF3,RNU6-923P,RXFP3,SLC45A2	ADAMTS12
MDAMB231	1.38	8:92847601-93113800	DUP	266200	3	GS1-5L10.1,RP11-122C21.1,RUNX1T1	RUNX1T1
MDAMB231	1.38	8:113651201-113767500	DUP	116300	2	CSMD3,MIR2053	CSMD3
MDAMB231	1.38	9:35374301-36467100	DUP	1092800	37	AL133410.1,CA9,CCDC107,CCIN,CD72,CLTA,CREB3,FAM166B,GBA2,GLIPR2,GNE,HINT2,HRCT1,LINC00961,MIR4667,MSMP,NPR2,OR13J1,OR2S2,RECK,RGP1,RMRP,RN7SL22P,RNF38,RNU4-53P,RP11-112J3.15,RP11-112J3.16,RP11-327L3.3,RP11-331F9.3,RP11-331F9.4,RUSC2,SIT1,TESK1,TLN1,TMEM8B,TPM2,UNC13B	RMRP
MDAMB231	1.38	10:70356001-70367200	DUP	11200	1	TET1	TET1
MDAMB231	1.38	10:90455501-91547400	DUP	1091900	29	ACTA2,ACTA2-AS1,AL353751.1,ANKRD22,CH25H,FAS,IFIT1,IFIT1B,IFIT2,IFIT3,IFIT5,KIF20B,LIPA,LIPK,LIPM,LIPN,MIR107,MIR4679-2,PANK1,RP11-149I23.3,RP11-168O10.6,RP11-399O19.9,RP11-80H5.2,RP11-80H5.6,RP11-80H5.7,RP11-80H5.9,SLC16A12,STAMBPL1,snoU13	FAS,LIPM
MDAMB231	1.38	10:99757301-100360500	DUP	603200	9	CRTAC1,HPS1,HPSE2,LOXL4,MIR1287,MIR4685,PYROXD2,R3HCC1L,RP11-34A14.3	HPSE2
MDAMB231	1.38	11:34408601-34705100	DUP	296500	6	AL137224.1,CAT,EHF,ELF5,RP11-350D17.2,RP4-594L9.2	EHF
MDAMB231	1.38	12:120428301-120590200	DUP	161900	4	CCDC64,GCN1L1,RAB35,snoU13	RAB35
MDAMB231	1.37	1:46377801-46998600	DUP	620800	16	DMBX1,FAAH,LINC00505,LRRC41,LURAP1,MAST2,NSUN4,PIK3R3,POMGNT1,RAD54L,RP11-322N21.2,RP4-533D7.4,RP4-533D7.5,RP5-1109J22.2,TSPAN1,UQCRH	PIK3R3
MDAMB231	1.37	1:98359101-98954800	DUP	595700	6	AL160056.1,DPYD,MIR137HG,RP11-272L13.3,RP11-490G2.2,RP5-1070A16.1	DPYD
MDAMB231	1.37	3:14043401-14644400	DUP	601000	12	AC093495.4,CHCHD4,GRIP2,LSM3,RNA5SP124,RNU6-905P,RP11-536I6.1,RP11-536I6.2,SLC6A6,TMEM43,TPRXL,XPC	XPC
MDAMB231	1.37	3:38002301-38201400	DUP	199100	6	ACAA1,CTDSPL,MIR26A1,MYD88,VILL,Y_RNA	MYD88
MDAMB231	1.37	6:37012801-37147000	DUP	134200	2	COX6A1P2,PIM1	PIM1
MDAMB231	1.37	10:95546501-96484700	DUP	938200	16	CYP2C18,CYP2C19,HELLS,LGI1,NOC3L,PLCE1,PLCE1-AS1,RNU6-657P,RNY4P26,RP11-119K6.6,RP11-162K11.4,RP11-391J2.3,RP11-429H9.4,RP11-76P2.4,SLC35G1,TBC1D12	CYP2C19,PLCE1
MDAMB231	1.37	11:102213501-102234600	DUP	21100	1	BIRC2	BIRC2
MDAMB231	1.37	17:56032801-56302100	DUP	269300	11	DYNLL2,EPX,LPO,MKS1,OR4D1,OR4D2,RP11-159D12.10,RP11-159D12.2,RP11-159D12.5,SRSF1,VEZF1	VEZF1
MDAMB231	1.37	17:61778401-61813800	DUP	35400	1	STRADA	STRADA
MDAMB231	1.37	17:62604401-63271400	DUP	667000	12	GNA13,LRRC37A3,RN7SL404P,RN7SL409P,RNU7-115P,RP11-160O5.1,RP11-583F2.2,RP11-583F2.5,RP11-927P21.1,RP11-927P21.11,RP11-927P21.2,hsa-mir-6080	GNA13
MDAMB231	1.36	1:45282601-45408000	DUP	125400	5	AL136380.1,EIF2B3,PTCH2,RNA5SP47,RNU5E-6P	PTCH2
MDAMB231	1.36	1:51823201-52512400	DUP	689200	19	AL589663.1,EPS15,KTI12,MIR761,NRD1,OSBPL9,RAB3B,RN7SL290P,RNA5SP48,RNU6-1281P,RNU6-877P,RP11-191G24.1,RP11-253A20.1,RP11-91A18.4,RP4-657D16.3,RP4-657D16.6,SNORA26,TXNDC12,Y_RNA	EPS15
MDAMB231	1.36	1:65344401-65454400	DUP	110000	2	JAK1,RP11-182I10.3	JAK1
MDAMB231	1.36	1:155868701-156904500	DUP	1035800	58	AL355388.1,AL365181.1,APOA1BP,ARHGEF2,BCAN,BGLAP,CCT3,CRABP2,GPATCH4,HAPLN2,HDGF,INSRR,IQGAP3,ISG20L2,KIAA0907,LAMTOR2,LMNA,LRRC71,MEF2D,MEX3A,MIR9-1,MRPL24,NES,NTRK1,PAQR6,PMF1,PMF1-BGLAP,PRCC,RAB25,RIT1,RP11-139I14.2,RP11-284F21.10,RP11-284F21.11,RP11-284F21.7,RP11-284F21.8,RP11-284F21.9,RP11-336K24.12,RP11-336K24.5,RP11-66D17.3,RP11-66D17.5,RP11-98G7.1,RRNAD1,RXFP4,SCARNA4,SEMA4A,SH2D2A,SLC25A…	CRABP2,NTRK1,RAB25,SMG5
MDAMB231	1.36	1:167546701-167866400	DUP	319700	5	ADCY10,MPZL1,RCSD1,RP1-313L4.3,RP3-455J7.4	RCSD1
MDAMB231	1.36	1:182887601-184036900	DUP	1149300	18	AL137800.1,AL450304.1,APOBEC4,ARPC5,COLGALT2,LAMC1,LAMC2,NCF2,NMNAT2,RGL1,RNA5SP71,RNU6-41P,RP1-127C7.6,RP11-181K3.4,RP11-444D13.1,SHCBP1L,SMG7-AS1,TSEN15	RGL1
MDAMB231	1.36	3:37052501-37445700	DUP	393200	11	C3orf35,GOLGA4,LRRFIP2,MLH1,RNA5SP129,RNU6-1301P,RP11-259K5.1,RP11-259K5.2,RP11-285J16.1,Y_RNA,snoU13	C3orf35,MLH1
MDAMB231	1.36	3:52090601-53078800	DUP	988200	36	ALAS1,BAP1,GLT8D1,GLYCTK,GLYCTK-AS1,GNL3,ITIH1,ITIH4,ITIH4-AS1,LINC00696,MIR135A1,MIRLET7G,MUSTN1,NEK4,NISCH,NT5DC2,PBRM1,PHF7,POC1A,PPM1M,RNU6-856P,RNU6ATAC16P,RP5-1157M23.2,SEMA3G,SFMBT1,SMIM4,SNORD19,SNORD19B,SNORD69,SPCS1,STAB1,TLR9,TMEM110,TNNC1,TWF2,WDR82	BAP1,PBRM1
MDAMB231	1.36	8:113768201-114207600	DUP	439400	1	CSMD3	CSMD3
MDAMB231	1.36	10:76659301-77287200	DUP	627900	16	AL392111.1,COMTD1,DUPD1,DUSP13,KAT6B,RP11-399K21.10,RP11-399K21.11,RP11-399K21.13,RP11-399K21.14,RP11-77G23.2,RP11-77G23.5,SAMD8,VDAC2,ZNF503,ZNF503-AS1,ZNF503-AS2	KAT6B,VDAC2
MDAMB231	1.36	10:80501101-81002800	DUP	501700	4	AC074323.1,RP11-481G8.2,ZMIZ1,ZMIZ1-AS1	ZMIZ1
MDAMB231	1.36	11:3778601-4012100	DUP	233500	9	AC090587.2,AC090587.4,AC090587.5,MIR4687,NUP98,RHOG,RNU7-50P,SNORA7,STIM1	NUP98
MDAMB231	1.36	12:113414301-113515200	DUP	100900	3	DTX1,OAS2,RP1-71H24.1	DTX1
MDAMB231	1.36	14:55798901-56028200	DUP	229300	5	FBXO34,KTN1,KTN1-AS1,RP11-665C16.5,TBPL2	KTN1
MDAMB231	1.36	17:41518301-42052900	DUP	534600	20	AC055813.1,C17orf105,CD300LG,CTC-501O10.1,DUSP3,ETV4,FAM215A,MEOX1,MIR2117,MPP2,MPP3,PYY,RNU6-406P,RNU6-971P,RP11-392O1.4,RP11-527L4.2,RP11-527L4.5,RP11-527L4.6,RP5-905N1.2,SOST	ETV4
MDAMB231	1.35	3:9925301-10147200	DUP	221900	12	AC022007.5,CRELD1,EMC3,FANCD2,FANCD2OS,IL17RC,JAGN1,PRRT3-AS1,RNU6-670P,RNU6-882P,RP11-1020A11.1,RP11-1020A11.2	FANCD2
MDAMB231	1.35	3:10147701-10651500	DUP	503800	16	AC090841.1,ATP2B2,ATP2B2-IT1,BRK1,FANCD2OS,GHRL,GHRLOS,IRAK2,LINC00852,MIR378B,MIR885,RNU6-814P,SEC13,TATDN2,VHL,snoU13	VHL
MDAMB231	1.35	3:50125501-50712100	DUP	586600	30	C3orf18,CACNA2D2,CYB561D2,GNAI2,GNAT1,HEMK1,HYAL1,HYAL2,HYAL3,IFRD2,LSMEM2,MAPKAPK3,MIR566,NAT6,RASSF1,RBM5,RNA5SP131,RP11-493K19.3,RP11-804H8.6,SEMA3B,SEMA3B-AS1,SEMA3F,SLC38A3,TMEM115,TUSC2,U73166.2,XXcos-LUCA11.4,XXcos-LUCA11.5,ZMYND10,ZMYND10-AS1	RASSF1
MDAMB231	1.35	6:41633801-42491500	DUP	857700	27	AL035588.1,BYSL,C6orf132,CCND3,FRS3,GUCA1A,GUCA1B,MED20,MRPS10,PGC,RNU6-761P,RP1-139D8.6,RP11-298J23.5,RP11-298J23.8,RP11-298J23.9,RP11-533O20.2,RP11-7K24.3,RP5-973N23.4,SNORA8,TAF8,TFEB,TOMM6,TRERF1,U3,USP49,Y_RNA,snoU13	CCND3
MDAMB231	1.35	6:43086701-43206700	DUP	120000	5	CUL9,DNPH1,PTK7,RP3-330M21.5,SRF	CUL9,PTK7,SRF
MDAMB231	1.35	8:113085701-113537300	DUP	451600	3	AC024996.1,CSMD3,RNU4-37P	CSMD3
MDAMB231	1.35	8:114411601-114934400	DUP	522800	3	AC107890.1,CSMD3,RP11-67H2.1	CSMD3
MDAMB231	1.35	9:36606801-37379100	DUP	772300	14	AL158155.1,MELK,MIR4475,MIR4476,MIR4540,PAX5,RP11-220I1.1,RP11-220I1.2,RP11-220I1.5,RP11-297B17.3,RP11-344B23.2,RP11-465M18.1,Y_RNA,ZCCHC7	PAX5
MDAMB231	1.35	9:136024701-136130700	DUP	106000	5	ABO,GBGT1,OBP2B,RALGDS,RP11-430N14.4	RALGDS
MDAMB231	1.35	11:9526801-9892800	DUP	366000	11	RN7SKP50,RN7SL56P,RNU7-28P,RP11-1H15.2,RP11-540A21.2,SBF2,SBF2-AS1,SWAP70,WEE1,ZNF143,snoU13	SWAP70
MDAMB231	1.35	11:44140901-44288600	DUP	147700	2	ALX4,EXT2	EXT2
MDAMB231	1.35	17:40428501-40749300	DUP	320800	17	AC107993.1,ATP6V0A1,COASY,HSD17B1,MIR5010,MIR548AT,MLX,NAGLU,PSMC3IP,PTRF,RNU7-97P,RP11-194N12.2,RP11-400F19.18,RP11-400F19.6,RP11-400F19.8,STAT3,STAT5A	STAT3,STAT5A
MDAMB231	1.35	17:42432301-43628900	DUP	1196600	53	AC002117.1,AC015936.3,AC091132.1,AC091132.2,ACBD4,ADAM11,ARHGAP27,C17orf104,C1QL1,CCDC103,CCDC43,CTB-39G8.2,CTB-39G8.3,CTC-296K1.3,CTC-296K1.4,CTD-2020K17.1,CTD-2020K17.3,CTD-2020K17.4,CTD-2534I21.8,CTD-2534I21.9,DBF4B,DCAKD,EFTUD2,FAM171A2,FAM187A,FMNL1,FZD2,GFAP,GJC1,HEXIM1,HEXIM2,HIGD1B,ITGA2B,KIF18B,MAP3K14,MAP3K14-AS1,NMT1,PLCD3,PLEKHM1,RN7SL258P,RN7SL405P,RN7SL730P,RN7SL739P,RN7SL819P,RNA5S…	MAP3K14
MDAMB231	1.35	17:56303001-56640800	DUP	337800	13	AC023992.1,BZRAP1-AS1,C17orf47,HSF5,LPO,MIR142,MIR4736,MPO,MTMR4,RNF43,RP11-112H10.4,SEPT4,TEX14	MIR142,RNF43
MDAMB231	1.35	17:57661401-57768800	DUP	107400	3	CLTC,DHX40,PTRH2	CLTC
MDAMB231	1.35	17:73335901-73354800	DUP	18900	2	GRB2,RP11-16C1.3	GRB2
MDAMB231	1.35	17:78316801-78450200	DUP	133400	4	CTD-2047H16.4,CTD-2526A2.2,MIR4730,RNF213	RNF213
MDAMB231	1.34	1:152244101-152464000	DUP	219900	5	CRNN,FLG,FLG-AS1,FLG2,RP1-91G5.3	FLG
MDAMB231	1.34	1:155120101-155301500	DUP	181400	18	AL713999.1,CLK2,FAM189B,FDPS,GBA,HCN3,KRTCAP2,MIR92B,MTX1,MUC1,PKLR,RP11-201K10.3,RP11-263K19.4,RP11-263K19.6,RUSC1,RUSC1-AS1,SCAMP3,TRIM46	GBA,MUC1
MDAMB231	1.34	1:211532201-211608800	DUP	76600	3	LINC00467,RP11-318L16.6,TRAF5	TRAF5
MDAMB231	1.34	3:48551301-48733000	DUP	181700	12	CELSR3,COL7A1,IP6K2,MIR4793,MIR711,NCKIPSD,PFKFB4,RP11-148G20.1,RP11-572O6.1,SLC26A6,TMEM89,UCN2	CELSR3,COL7A1
MDAMB231	1.34	6:39735439-43206714	DUP	3471275	82	AL035588.1,AL136967.1,APOBEC2,BYSL,C6orf132,C6orf226,CCND3,CNPY3,CUL7,CUL9,DAAM2,DNPH1,FOXP4,FRS3,GLTSCR1L,GNMT,GUCA1A,GUCA1B,KLHDC3,LINC00951,LRFN2,MDFI,MEA1,MED20,MIR4641,MRPL2,MRPS10,NCR2,NFYA,PEX6,PGC,PPP2R5D,PRPH2,PTCRA,PTK7,RN7SL403P,RNA5SP207,RNU6-250P,RNU6-643P,RNU6-761P,RNU6-890P,RP1-139D8.6,RP1-20C7.6,RP11-121P10.1,RP11-298J23.5,RP11-298J23.8,RP11-298J23.9,RP11-328M4.2,RP11-328M4.3,RP11…	CCND3,CUL9,FOXP4,PTK7,SRF
MDAMB231	1.34	10:88666501-88984100	DUP	317600	16	ADIRF,AGAP11,BMPR1A,FAM25A,FAM35A,GLUD1,MMRN2,NUTM2A-AS1,RN7SL733P,RNU6-529P,RP11-96C23.10,RP11-96C23.14,RP11-96C23.15,RP11-96C23.5,RP11-96C23.9,SNCG	BMPR1A
MDAMB231	1.34	17:40292801-40428200	DUP	135400	8	AC003104.1,GHDC,HCRT,KCNH4,RAB5C,RP11-358B23.1,RP11-358B23.5,STAT5B	STAT5B
MDAMB231	1.34	17:61817801-61963200	DUP	145400	9	CCDC47,CSH2,DDX42,FTSJ3,GH2,PSMC5,RN7SL805P,SMARCD2,STRADA	STRADA
MDAMB231	1.34	17:75955601-76282300	DUP	326700	12	AC087645.1,AFMID,BIRC5,C17orf99,RNU6-625P,RP11-219G17.4,SYNGR2,TK1,TMC6,TMC8,TMEM235,TNRC6C	BIRC5,TK1
MDAMB231	1.33	8:114211701-114314200	DUP	102500	1	CSMD3	CSMD3
MDAMB231	1.33	8:114328201-114367700	DUP	39500	1	CSMD3	CSMD3
MDAMB231	1.33	10:88190301-88666200	DUP	475900	9	BMPR1A,LDB3,OPN4,RNU1-19P,RNU6-780P,RP11-359E3.4,RP11-77P6.2,U3,WAPAL	BMPR1A,WAPAL
MDAMB231	1.33	13:41325101-41343300	DUP	18200	1	MRPS31	MRPS31
MDAMB231	1.33	16:30914101-31117600	DUP	203500	17	AC135048.1,AC135048.13,AC135050.5,BCKDK,CTF1,FBXL19,FBXL19-AS1,HSD3B7,ORAI3,PRSS53,RP11-196G11.2,SETD1A,STX1B,STX4,VKORC1,ZNF646,ZNF668	ZNF668
MDAMB231	1.28	2:60586291-61303544	DUP	717253	16	AC007381.2,AC009970.1,AC010733.4,BCL11A,KIAA1841,MIR4432,PAPOLG,PEX13,REL,RN7SL361P,RN7SL632P,RNA5SP95,RNU1-32P,RNU4-51P,RNU6-612P,RP11-373L24.1	BCL11A,REL
MDAMB231	1.24	16:79225210-80008923	DUP	783713	9	AC009159.1,MAF,RNA5SP431,RP11-345M22.1,RP11-345M22.2,RP11-345M22.3,RP11-467I17.1,RP11-679B19.2,WWOX	MAF,WWOX
MDAMB231	1.22	13:85174287-104786622	DUP	19612335	99	ABCC4,AL139318.1,AL354896.1,CLDN10,CLDN10-AS1,DCT,DNAJC3,DNAJC3-AS1,DOCK9,DOCK9-AS1,DOCK9-AS2,DZIP1,FARP1,FARP1-AS1,GPC5,GPC5-AS1,GPC5-AS2,GPC5-IT1,GPC6,GPC6-AS1,GPC6-AS2,GPR18,GPR180,GPR183,HS6ST3,LINC00351,LINC00353,LINC00359,LINC00363,LINC00375,LINC00379,LINC00380,LINC00391,LINC00397,LINC00410,LINC00430,LINC00433,LINC00440,LINC00456,LINC00557,LINC00559,LINC00560,LINC01040,LINC01047,LINC01049,M…	GPC5
MDAMB231	1.04	9:123718261-123922857	DEL	204596	2	C5,CNTRL	CNTRL
MDAMB231	0.95	1:72112814-72240616	DEL	127802	1	NEGR1	NEGR1
MDAMB231	0.86	5:138099019-138177699	DEL	78680	1	CTNNA1	CTNNA1
MDAMB231	0.79	2:140698901-142182700	DEL	1483800	5	AC073928.2,LRP1B,RN7SL283P,RNU6-904P,Y_RNA	LRP1B
MDAMB231	0.79	3:96338701-97082200	DEL	743500	2	AC117444.1,EPHA6	EPHA6
MDAMB231	0.79	4:61740501-62322300	DEL	581800	4	LPHN3,MIR548AG1,RP11-16N2.1,RP11-798L4.1	LPHN3
MDAMB231	0.79	4:65840101-66570300	DEL	730200	4	EPHA5,RP11-707A18.1,RP11-807H7.1,RP11-807H7.2	EPHA5
MDAMB231	0.79	4:181936801-182160300	DEL	223500	1	LINC00290	LINC00290
MDAMB231	0.79	6:162495076-162637761	DEL	142685	1	PARK2	PARK2
MDAMB231	0.79	8:38248901-38414400	DEL	165500	8	C8orf86,FGFR1,LETM2,RP11-350N15.3,RP11-350N15.4,RP11-350N15.6,RP11-675F6.3,RP11-675F6.4	FGFR1,LETM2
MDAMB231	0.79	10:130266401-133145100	DEL	2878700	17	AL355531.1,AL355531.2,AL607076.1,EBF3,GLRX3,LINC00959,MGMT,MIR378C,MIR4297,RP11-109A6.2,RP11-109A6.3,RP11-168C9.1,RP11-442O18.1,RP11-442O18.2,RP11-540N6.1,TCERG1L-AS1,Y_RNA	MGMT
MDAMB231	0.78	1:13693201-14027100	DEL	333900	11	AL359771.1,CTA-520D8.2,LRRC38,PDPN,PRAMEF17,PRAMEF19,PRAMEF20,PRDM2,RNA5SP41,RP4-597A16.2,SCARNA11	PRDM2
MDAMB231	0.78	2:16018901-16282210	DEL	263310	8	AC010145.4,AC130710.1,AC142119.1,MYCN,MYCNOS,MYCNUN,RN7SL104P,snoU13	MYCN
MDAMB231	0.78	3:180867601-181817600	DEL	950000	9	RN7SKP265,RN7SL703P,RNA5SP150,RNU6-4P,RP11-275H4.1,RP11-416O18.1,RP11-4B14.3,SOX2,SOX2-OT	SOX2
MDAMB231	0.78	4:45088101-46765500	DEL	1677400	8	COX7B2,GABRA2,GABRG1,RN7SKP199,RNU6-412P,RNU6-931P,RP11-320H14.1,RP11-436F23.1	GABRG1
MDAMB231	0.78	4:106199001-106229200	DEL	30200	2	RN7SL89P,TET2	TET2
MDAMB231	0.78	4:161107201-162539200	DEL	1432000	4	AC106860.1,FSTL5,RP11-234O6.2,RP11-502M1.2	FSTL5
MDAMB231	0.78	4:162913701-163826600	DEL	912900	3	AC005150.1,FSTL5,RP11-497K21.1	FSTL5
MDAMB231	0.78	15:24780201-25675500	DEL	895300	87	NPAP1,PWAR6,PWRN1,RP11-145P16.3,RP11-701H24.10,RP11-701H24.3,RP11-701H24.7,RP13-487P22.1,SNORD108,SNORD109A,SNORD109B,SNORD115,SNORD115-1,SNORD115-10,SNORD115-11,SNORD115-12,SNORD115-14,SNORD115-15,SNORD115-16,SNORD115-17,SNORD115-18,SNORD115-19,SNORD115-2,SNORD115-20,SNORD115-21,SNORD115-22,SNORD115-23,SNORD115-24,SNORD115-25,SNORD115-27,SNORD115-28,SNORD115-29,SNORD115-3,SNORD115-30,SNORD115-31…	UBE3A
MDAMB231	0.77	4:62576901-62807100	DEL	230200	2	LPHN3,Y_RNA	LPHN3
MDAMB231	0.77	12:40641101-40692800	DEL	51700	1	LRRK2	LRRK2
MDAMB231	0.76	4:62811201-64783600	DEL	1972400	5	AC110810.1,LPHN3,RP11-12K22.1,RP11-257A22.1,RP11-84A1.3	LPHN3
MDAMB231	0.63	16:78295501-79067600	DEL	772100	6	PIH1,RP11-264L1.3,RP11-264L1.4,RP11-319G9.3,RP11-319G9.5,WWOX	WWOX
MDAMB231	0.6	4:183204029-183272178	DEL	68149	1	TENM3	TENM3
MDAMB231	0.48	8:26976101-31568800	DEL	4592700	83	AC084262.1,AC084262.2,AC084262.3,AC090150.1,AC131254.1,AC145110.1,CCDC25,CHRNA2,CLU,CTD-2373N4.5,CTD-2647L4.1,CTD-2647L4.4,CTD-2647L4.5,DCTN6,DUSP4,ELP3,EPHX2,ESCO2,EXTL3,EXTL3-AS1,FAM183CP,FZD3,GSR,GTF2E2,HMBOX1,HMBOX1-IT1,KIF13B,LEPROTL1,LINC00589,MBOAT4,MIR3148,MIR3622B,MIR4287,MIR4288,NRG1,NUGGC,PBK,PNOC,PTK2B,PURG,RBPMS,RBPMS-AS1,RN7SL781P,RNA5SP259,RNA5SP260,RNA5SP261,RNU5A-3P,RNU6-1086P,RN…	WRN
MDAMB231	0.47	8:10795301-12014500	DEL	1219200	38	AF131215.2,AF131215.3,AF131215.4,AF131215.5,AF131215.6,AF131215.8,AF131215.9,AF131216.5,AF131216.6,BLK,C8orf12,C8orf49,DEFB130,DEFB134,DEFB135,DEFB136,FAM167A,FAM66D,FDFT1,GATA4,LINC00208,LINC00529,MIR598,MTMR9,NEIL2,RN7SL293P,RNA5SP253,RNU6-1084P,RP11-148O21.2,RP11-148O21.3,RP11-148O21.4,RP11-148O21.6,RP11-481A20.11,RP11-589N15.2,SLC35G5,USP17L2,XKR6,ZNF705D	GATA4
MDAMB231	0.47	8:18455601-23203600	DEL	4748000	83	AC009695.1,AC021613.1,AC022716.1,AC037459.4,AC090420.1,AC100802.3,ATP6V1B2,BIN3,BMP1,C8orf58,CCAR2,CHMP7,CSGALNACT1,CTD-2530N21.4,CTD-3247F14.2,DMTN,DOK2,EGR3,FGF17,GFRA2,HR,INTS10,LGI3,LOXL2,LPL,LZTS1,LZTS1-AS1,MIR320A,NPM2,NUDT18,PDLIM2,PEBP4,PHYHIP,PIWIL2,POLR3D,PPP3CC,PSD3,R3HCC1,REEP4,RHOBTB2,RN7SL303P,RNU6-336P,RNU6-892P,RP11-1080G15.1,RP11-1080G15.2,RP11-108E14.1,RP11-1105O14.1,RP11-1149O2…	EGR3,TNFRSF10A
MDAMB231	0.47	8:23204001-26254300	DEL	3050300	40	AC012119.1,AC051642.1,ADAM28,ADAM7,ADAMDEC1,BNIP3L,CDCA2,CTC-756D1.2,CTC-756D1.3,CTD-2168K21.1,CTD-2168K21.2,DOCK5,EBF2,ENTPD4,FP15737,GNRH1,GS1-72M22.1,KCTD9,LOXL2,NEFL,NEFM,NKX2-6,NKX3-1,PPP2R2A,RN7SL651P,RNA5SP258,RNU1-148P,RNU4-71P,RP11-175E9.1,RP11-203E8.1,RP11-213G6.2,RP11-219J21.1,RP11-219J21.2,RP11-299D14.2,RP11-395I14.2,RP11-561E1.1,RP11-624C23.1,SLC25A37,SNORA67,STC1	PPP2R2A
MDAMB231	0.45	8:14663001-18454800	DEL	3791800	35	AC091559.1,ASAH1,CNOT7,CTD-2023J5.1,CTD-2547L16.1,FGF20,FGL1,MICU3,MIR383,MIR548V,MSR1,MTMR7,MTUS1,NAT1,NAT2,PCM1,PDGFRL,PSD3,RN7SL474P,RNA5SP256,RP11-13N12.1,RP11-13N12.2,RP11-156K13.1,RP11-156K13.2,RP11-156K13.3,RP11-242F4.2,RP11-326L2.1,RP11-468H14.2,RP11-77B22.2,RP11-806O11.1,SGCZ,SLC7A2,TUSC3,VPS37A,ZDHHC2	PCM1,TUSC3
MDAMB231	0.43	1:110462291-110463014	DEL	723	1	CSF1	CSF1
MDAMB231	0.43	22:50792701-51230800	DEL	438100	27	AC000036.4,AC002056.5,ADM2,ARSA,CHKB,CHKB-AS1,CPT1B,CTA-384D8.31,CTA-384D8.33,CTA-384D8.34,CTA-384D8.35,CTA-384D8.36,KLHDC7B,LMF2,MAPK8IP2,MIOX,NCAPH2,PPP6R2,RABL2B,RN7SL500P,RNU6-409P,SBF1,SCO2,SHANK3,SYCE3,TYMP,Y_RNA	NCAPH2
MDAMB231	0.42	1:3305626-3326863	DEL	21237	1	PRDM16	PRDM16
MDAMB231	0.42	8:2284801-5427200	DEL	3142400	12	AC133633.1,AC133633.2,CSMD1,GS1-57L11.1,RN7SL318P,RN7SL872P,RNA5SP251,RP11-134O21.1,RP11-279L11.1,RP11-378A12.1,RP5-991O23.1,SNORA70	CSMD1
MDAMB231	0.41	9:3615901-12556800	DEL	8940900	70	AK3,AL158147.1,AL158147.2,AL161450.1,AL162419.1,AL353733.1,C9orf38,CD274,CDC37L1,GLDC,GLIS3,GLIS3-AS1,IL33,INSL4,INSL6,JAK2,KDM4C,KIAA1432,MIR101-2,MIR4665,MLANA,PDCD1LG2,PLGRKT,PPAPDC2,PTPRD,RANBP6,RCL1,RLN1,RLN2,RN7SL123P,RN7SL25P,RN7SL5P,RNU2-47P,RNU6-694P,RNU7-185P,RP11-109M17.2,RP11-125K10.5,RP11-12D24.10,RP11-134K1.3,RP11-207C16.4,RP11-218I7.2,RP11-23D5.1,RP11-252M18.3,RP11-29B9.1,RP11-29B9…	CD274,JAK2,KDM4C,PDCD1LG2,PTPRD
MDAMB231	0.39	16:78663142-78737545	DEL	74403	1	WWOX	WWOX
MDAMB231	0.37	9:3615921-18077131	DEL	14461210	100	AK3,AL158147.1,AL158147.2,AL161450.1,AL162419.1,AL353733.1,C9orf38,C9orf92,CCDC171,CD274,CDC37L1,CER1,FREM1,GLDC,GLIS3,GLIS3-AS1,IL33,INSL4,INSL6,JAK2,KDM4C,KIAA1432,LINC00583,LURAP1L,MIR101-2,MIR4665,MLANA,MPDZ,NFIB,PDCD1LG2,PLGRKT,PPAPDC2,PSIP1,PTPRD,RANBP6,RCL1,RLN1,RLN2,RN7SL123P,RN7SL157P,RN7SL25P,RN7SL5P,RN7SL849P,RN7SL98P,RNU2-47P,RNU6-1260P,RNU6-14P,RNU6-246P,RNU6-319P,RNU6-559P,RNU6-694P…	CD274,JAK2,KDM4C,PDCD1LG2,PSIP1,PTPRD
MDAMB231	0.36	16:78386916-78551145	DEL	164229	2	RP11-264L1.4,WWOX	WWOX
MDAMB231	0.28	9:12855301-22999000	DEL	10143700	99	ACER2,ADAMTSL1,AL158077.1,AL158150.1,AL163193.1,AL359922.1,AL512635.1,BNC2,C9orf53,C9orf92,CCDC171,CDKN2A,CDKN2B,CDKN2B-AS1,CER1,CNTLN,DENND4C,FAM154A,FOCAD,FREM1,HAUS6,IFNA1,IFNA10,IFNA13,IFNA14,IFNA16,IFNA17,IFNA2,IFNA21,IFNA4,IFNA5,IFNA6,IFNA7,IFNA8,IFNB1,IFNE,IFNW1,KLHL9,LINC00583,MIR31,MIR3152,MIR31HG,MIR4473,MIR4474,MIR491,MLLT3,MPDZ,MTAP,NFIB,PLIN2,PSIP1,PTPLAD2,RN7SKP258,RN7SL151P,RN7SL15…	CDKN2A,CDKN2B,MLLT3,MTAP,PSIP1
MDAMB231	0.15	9:16465939-24889831	DEL	8423892	85	ACER2,ADAMTSL1,AL157830.1,AL158077.1,AL158150.1,AL163193.1,AL359922.1,AL391117.1,AL512635.1,BNC2,C9orf53,CDKN2A,CDKN2B,CDKN2B-AS1,CNTLN,DENND4C,DMRTA1,ELAVL2,FAM154A,FOCAD,HAUS6,IFNA1,IFNA10,IFNA13,IFNA14,IFNA16,IFNA17,IFNA2,IFNA21,IFNA4,IFNA5,IFNA6,IFNA7,IFNA8,IFNB1,IFNE,IFNW1,IZUMO3,KLHL9,MIR31,MIR3152,MIR31HG,MIR4473,MIR4474,MIR491,MLLT3,MTAP,PLIN2,PTPLAD2,RN7SKP258,RN7SL151P,RN7SL158P,RN7SL72…	CDKN2A,CDKN2B,MLLT3,MTAP
MDAMB231	0.09	9:20835192-26061084	DEL	5225892	49	AL157830.1,AL359922.1,AL391117.1,C9orf53,CDKN2A,CDKN2B,CDKN2B-AS1,DMRTA1,ELAVL2,FOCAD,IFNA1,IFNA10,IFNA13,IFNA14,IFNA16,IFNA17,IFNA2,IFNA21,IFNA4,IFNA5,IFNA6,IFNA7,IFNA8,IFNB1,IFNE,IFNW1,IZUMO3,KLHL9,MIR31,MIR31HG,MTAP,PTPLAD2,RMRPP5,RN7SKP120,RN7SL151P,RP11-149I2.4,RP11-20A20.2,RP11-315I14.2,RP11-321L2.1,RP11-321L2.2,RP11-33G16.1,RP11-354P17.15,RP11-370B11.3,RP11-399D6.2,RP11-408N14.1,RP11-70L8.…	CDKN2A,CDKN2B,MTAP
MDAMB231	0	9:9725902-9952066	DEL	226164	2	PTPRD,RP11-527D15.1	PTPRD

## Sheet: 5D
Table S5D: List of copy number alterations identified in the cell line models
SAMPLE	RatioToAverageCoverage	LOCATION	SVTYPE	SVLEN	NumofGenes	GENES	CandidateGene
MDAMB468	30.81	7:55161156-55190147	DUP	28991	1	EGFR	EGFR
MDAMB468	30.57	7:55164891-55218962	DUP	54071	1	EGFR	EGFR
MDAMB468	30.55	7:54651293-55219846	DUP	568553	5	EGFR,RNU6-1125P,RP11-745C15.2,SEC61G,SNORA73	EGFR
MDAMB468	27.65	7:55235101-55287600	DUP	52500	2	EGFR,EGFR-AS1	EGFR
MDAMB468	17.06	7:55289001-56217700	DUP	928700	20	CCT6A,CHCHD2,EGFR,GBAS,LANCL2,MRPS17,NUPR1L,PHKG1,RN7SL64P,RNU6-1126P,RNU6-389P,RP11-310H4.1,RP11-310H4.2,RP11-310H4.3,SEPT14,SNORA15,SNORA22,SUMF2,VOPP1,snoU13	EGFR
MDAMB468	2.92	9:35495301-36362900	DUP	867600	36	AL133410.1,CA9,CCDC107,CCIN,CD72,CLTA,CREB3,FAM166B,GBA2,GLIPR2,GNE,HINT2,HRCT1,LINC00961,MIR4667,MSMP,NPR2,OR13J1,OR2S2,RECK,RGP1,RMRP,RN7SL22P,RNF38,RNU4-53P,RP11-112J3.15,RP11-112J3.16,RP11-327L3.3,RP11-331F9.3,RP11-331F9.4,RUSC2,SIT1,TESK1,TLN1,TMEM8B,TPM2	RMRP
MDAMB468	2.83	9:36606801-37808400	DUP	1201600	26	AL158155.1,DCAF10,FBXO10,FRMPD1,GRHPR,MELK,MIR4475,MIR4476,MIR4540,PAX5,POLR1E,RN7SKP171,RN7SL463P,RP11-220I1.1,RP11-220I1.2,RP11-220I1.5,RP11-297B17.3,RP11-344B23.2,RP11-397D12.4,RP11-465M18.1,RP11-613M10.6,RP11-613M10.8,TRMT10B,Y_RNA,ZBTB5,ZCCHC7	PAX5
MDAMB468	2.8	9:34924715-38440097	DUP	3515382	82	AL133410.1,AL158155.1,AL160274.1,ALDH1B1,C9orf131,CA9,CCDC107,CCIN,CD72,CLTA,CREB3,DCAF10,DNAJB5,FAM166B,FAM214B,FBXO10,FLJ00273,FRMPD1,GBA2,GLIPR2,GNE,GRHPR,HINT2,HRCT1,IGFBPL1,KIAA1045,LINC00961,MELK,MIR4475,MIR4476,MIR4540,MIR4667,MSMP,NPR2,OR13J1,OR2S2,PAX5,PIGO,POLR1E,RECK,RGP1,RMRP,RN7SKP171,RN7SL22P,RN7SL338P,RN7SL463P,RNF38,RNU4-53P,RNU7-124P,RP11-112J3.15,RP11-112J3.16,RP11-113O24.3,RP11…	PAX5,RMRP
MDAMB468	2.74	19:9820401-11412600	DUP	1592200	72	AC008752.1,AC008752.2,AC008752.3,AC011475.1,ANGPTL6,AP1M2,C19orf38,C19orf52,C19orf80,CARM1,CDC37,CDKN2D,COL5A3,CTC-215O4.4,CTC-429L19.3,CTC-510F12.2,CTC-510F12.4,CTD-2240E14.4,CTD-2369P2.2,CTD-2369P2.4,CTD-2369P2.5,CTD-2369P2.8,CTD-2553C6.1,CTD-2623N2.11,CTD-2623N2.5,CTD-3116E22.7,DNM2,DOCK6,EIF3G,FBXL12,FDX1L,ICAM1,ICAM4,ICAM5,ILF3,ILF3-AS1,KANK2,KEAP1,LDLR,MIR1181,MIR1238,MIR199A1,MIR4322,MIR47…	DNM2,KEAP1,MRPL4,S1PR2,SMARCA4,TYK2
MDAMB468	2.46	11:27589801-29007100	DUP	1417300	13	BDNF,BDNF-AS,KIF18A,LINC00678,METTL15,MIR610,RN7SKP158,RP11-115J23.1,RP11-22P4.1,RP11-22P4.2,RP11-406D1.2,RP11-587D21.4,RP11-960D24.1	BDNF
MDAMB468	2.43	11:32390601-32543500	DUP	152900	2	WT1,WT1-AS	WT1
MDAMB468	2.4	11:35203701-35763900	DUP	560200	11	CD44,FJX1,PAMR1,RP1-276E15.1,RP1-68D18.2,RP1-68D18.3,RP1-68D18.4,RP4-683L5.1,RP5-945I17.2,SLC1A2,TRIM44	SLC1A2
MDAMB468	2.33	11:34048801-35203000	DUP	1154200	15	ABTB2,AL137224.1,AL356215.1,CAPRIN1,CAT,CD44,EHF,ELF5,MIR1343,NAT10,PDHX,RP11-350D17.2,RP4-594L9.2,RP4-607I7.1,Y_RNA	EHF
MDAMB468	2.32	17:70081766-70150815	DUP	69049	3	AC007461.2,SOX9,SOX9-AS1	SOX9
MDAMB468	2.31	18:8062401-9324200	DUP	1261800	21	ANKRD12,AP001094.1,AP005227.1,PTPRM,RAB12,RN7SL50P,RP11-143J12.2,RP11-143J12.3,RP11-21J18.1,RP11-376P6.3,RP11-661O13.1,RP11-674N23.1,RP11-674N23.4,RP11-789C17.1,RP11-789C17.3,RP11-789C17.5,RP11-888D10.3,RP11-888D10.4,SOGA2,Y_RNA,snoU13	ANKRD12
MDAMB468	2.22	14:20707001-21058000	DUP	351000	22	APEX1,CCNB1IP1,CTD-2292M16.7,CTD-2292M16.8,KLHL33,OR11H4,OSGEP,PARP2,PNP,RNA5SP382,RNASE10,RNASE11,RNASE9,RP11-14J7.6,RP11-203M5.2,RP11-203M5.7,RP11-203M5.8,RPPH1,SNORA79,SNORD126,TMEM55B,TTC5	PNP
MDAMB468	2.2	18:541701-662900	DUP	121200	8	AP001178.1,C18orf56,CETN1,CLUL1,RN7SKP146,RP11-806L2.2,RP11-806L2.5,TYMS	TYMS
MDAMB468	2.2	18:666101-828000	DUP	161900	8	RNU1-109P,RP11-672L10.6,RP11-769O8.1,RP11-769O8.2,RP11-769O8.3,RP11-806L2.6,TYMS,YES1	TYMS,YES1
MDAMB468	2.19	1:40001301-40959900	DUP	958600	29	BMP8B,CAP1,COL9A2,HEYL,HPCAL4,MFSD2A,MYCL,NT5C1A,OXCT2,PPIE,PPT1,RLF,RNU6-1237P,RNU7-121P,RP1-118J21.25,RP1-118J21.5,RP1-144F13.3,RP1-228H13.5,RP1-39G22.7,RP11-656D10.3,RP11-69E11.4,RP11-69E11.8,SMAP2,SNORA55,TMCO2,TRIT1,Y_RNA,ZFP69,ZMPSTE24	MYCL
MDAMB468	2.18	1:38241973-41992081	DUP	3750108	86	AKIRIN1,AL929472.1,BMP8A,BMP8B,C1orf122,CAP1,CITED4,COL9A2,CTPS1,EDN2,EXO5,FHL3,FOXO6,GJA9,HEYL,HIVEP3,HPCAL4,INPP5B,KCNQ4,KIAA0754,MACF1,MANEAL,MFSD2A,MIR30C1,MIR30E,MIR3659,MTF1,MYCBP,MYCL,NDUFS5,NFYC-AS1,NT5C1A,OXCT2,POU3F1,PPIE,PPT1,RHBDL2,RIMS3,RLF,RN7SL326P,RNA5SP44,RNA5SP45,RNU6-1237P,RNU6-510P,RNU6-584P,RNU6-605P,RNU6-608P,RNU6-753P,RNU7-121P,RP1-118J21.25,RP1-118J21.5,RP1-144F13.3,RP1-22…	MYCL
MDAMB468	2.12	18:5543901-7984500	DUP	2440600	37	AP000897.1,AP001032.1,AP005118.1,ARHGAP28,C18orf64,CTD-2124B20.2,CTD-2124B20.3,EPB41L3,L3MBTL4,LAMA1,LINC00668,LRRC30,MIR3976,PTPRM,RN7SL282P,RN7SL537P,RN7SL723P,RNU5F-3P,RNU6-349P,RNU6-916P,RP11-146G7.2,RP11-286N3.2,RP11-678G15.1,RP11-678G15.2,RP11-760N9.1,RP11-76K13.3,RP11-781P6.1,RP11-793A3.1,RP11-793A3.2,RP11-91I8.1,RP11-91I8.3,RP11-945C19.1,RP11-945C19.4,SNORA48,SNORD112,TMEM200C,snR65	LAMA1
MDAMB468	2.05	6:202201-501000	DUP	298800	5	DUSP22,EXOC2,IRF4,RP3-416J7.4,RP3-416J7.5	DUSP22,IRF4
MDAMB468	1.98	6:10582901-11617000	DUP	1034100	25	C6orf52,ELOVL2,ELOVL2-AS1,ERVFRD-1,GCM2,GCNT2,GCNT6,MAK,NEDD9,PAK1IP1,RNA5SP203,RNU1-64P,RP11-421M1.8,RP11-637O19.2,RP11-679B17.2,RP11-716O23.1,RP11-716O23.2,RP3-510L9.1,SMIM13,SYCP2L,TMEM14B,TMEM14C,TMEM170B,Y_RNA,snoU13	NEDD9
MDAMB468	1.93	6:29906001-31193300	DUP	1287300	64	ABCF1,AL662800.1,AL662800.2,AL669914.1,ATAT1,C6orf15,CCHCR1,CDSN,DDR1,DDR1-AS1,DHX16,DPCR1,GNL1,GTF2H4,HCG17,HCG18,HCG20,HCG21,HCG22,HCG27,HCG9,HLA-A,HLA-E,IER3,LINC00243,MDC1,MDC1-AS1,MIR4640,MIR877,MRPS18B,MUC21,MUC22,NRM,POU5F1,PPP1R10,PPP1R11,PPP1R18,PRR3,PSORS1C1,PSORS1C2,PSORS1C3,RN7SKP186,RN7SL175P,RN7SL353P,RNF39,RNU6-1133P,RPP21,SNORA48,TCF19,TRIM10,TRIM15,TRIM31-AS1,TRIM39,TRIM39-RPP21,…	DDR1,HLA-A,POU5F1
MDAMB468	1.88	6:16011601-18888000	DUP	2876400	27	AL034375.1,ATXN1,CAP2,DEK,FAM8A1,GMPR,KDM1B,KIF13A,MIR4639,MIR548A1,MYLIP,NHLRC1,NUP153,RBM24,RNA5SP204,RNF144B,RNU6-1114P,RNU6-190P,RNU6-263P,RP1-151F17.1,RP1-151F17.2,RP11-500C11.3,STMND1,TPMT,U3,Y_RNA,snoU13	DEK,KDM1B,TPMT
MDAMB468	1.85	6:18889101-21290600	DUP	2401500	19	AL136303.1,CDKAL1,E2F3,E2F3-IT1,ID4,MBOAT1,RN7SL128P,RNA5SP205,RNU6-141P,RNU6-150P,RNU6-801P,RP1-167F1.2,RP11-239H6.2,RP11-686D16.1,RP3-348I23.2,RP3-471C18.1,RP3-471C18.2,RP4-625H18.2,Y_RNA	E2F3
MDAMB468	1.85	11:43909901-45427700	DUP	1517800	25	AC068858.1,ACCS,ACCSL,ALKBH3-AS1,ALX4,C11orf96,CD82,CTD-2560E9.3,CTD-2560E9.5,CTD-2609K8.3,EXT2,PRDM11,RP11-430H10.1,RP11-430H10.2,RP11-430H10.3,RP11-430H10.4,RP11-45A12.1,RP11-45A12.2,RP11-58K22.1,RP11-58K22.4,RP11-58K22.5,RP11-613D13.4,RP11-613D13.8,SYT13,TSPAN18	EXT2
MDAMB468	1.81	6:25898301-26343800	DUP	445500	38	HFE,HIST1H1A,HIST1H1C,HIST1H1D,HIST1H1E,HIST1H1T,HIST1H2AB,HIST1H2AD,HIST1H2AE,HIST1H2BB,HIST1H2BC,HIST1H2BD,HIST1H2BE,HIST1H2BF,HIST1H2BG,HIST1H2BH,HIST1H2BI,HIST1H3A,HIST1H3B,HIST1H3C,HIST1H3D,HIST1H3E,HIST1H3F,HIST1H3G,HIST1H4A,HIST1H4B,HIST1H4C,HIST1H4D,HIST1H4E,HIST1H4F,HIST1H4G,HIST1H4H,SLC17A2,TRIM38,U91328.19,U91328.20,U91328.21,U91328.22	HFE,HIST1H1C,HIST1H1D,HIST1H1E,HIST1H2BC,HIST1H2BD,HIST1H3B
MDAMB468	1.81	6:28680901-29685600	DUP	1004700	35	AL662890.1,AL662890.3,C6orf100,GABBR1,HCG14,HCG15,HCG16,LINC01015,MAS1L,MOG,OR10C1,OR11A1,OR12D2,OR12D3,OR14J1,OR2B3,OR2H1,OR2H2,OR2J1,OR2J2,OR2J3,OR2W1,OR5V1,RN7SL471P,RNU6-930P,SNORD32B,TRIM27,UBD,XXbac-BCX196D17.5,XXbac-BPG13B8.10,XXbac-BPG308J9.3,XXbac-BPG308K3.5,XXbac-BPG308K3.6,ZFP57,ZNF311	TRIM27
MDAMB468	1.77	6:15026901-16010900	DUP	984000	10	AL050335.1,DTNBP1,JARID2,JARID2-AS1,RN7SL332P,RNU6-522P,RNU6-645P,RP11-146I2.1,RP11-401E14.2,RP11-560J1.2	JARID2
MDAMB468	1.74	6:27069001-28022300	DUP	953300	33	HIST1H1B,HIST1H2AG,HIST1H2AH,HIST1H2AI,HIST1H2AJ,HIST1H2AK,HIST1H2AL,HIST1H2AM,HIST1H2BJ,HIST1H2BK,HIST1H2BL,HIST1H2BM,HIST1H2BO,HIST1H3H,HIST1H3I,HIST1H3J,HIST1H4I,HIST1H4J,HIST1H4K,HIST1H4L,MIR3143,OR2B2,OR2B6,POM121L2,RNU2-62P,RNU6-471P,RNU7-26P,RP1-153G14.4,RP1-86C11.7,TRNAI6,U3,ZNF184,ZNF391	HIST1H2AG,HIST1H2AL,HIST1H2AM,HIST1H2BJ,HIST1H2BK,HIST1H2BO,HIST1H4I
MDAMB468	1.7	1:37421553-49450920	DUP	12029367	98	AKIRIN1,AL929472.1,BMP8A,BMP8B,C1orf109,C1orf122,CAP1,CDCA8,CITED4,COL9A2,CTPS1,DNALI1,EXO5,FHL3,FOXO6,GJA9,GNL2,GRIK3,HEYL,HPCAL4,INPP5B,KCNQ4,KIAA0754,LINC01137,MACF1,MANEAL,MEAF6,MFSD2A,MIR30C1,MIR30E,MIR3659,MIR4255,MIR5581,MTF1,MYCBP,MYCL,NDUFS5,NFYC-AS1,NT5C1A,OXCT2,POU3F1,PPIE,PPT1,RHBDL2,RIMS3,RLF,RN7SL326P,RNA5SP43,RNA5SP44,RNU6-1237P,RNU6-510P,RNU6-584P,RNU6-605P,RNU6-608P,RNU6-636P,RNU…	MYCL
MDAMB468	1.66	8:104993204-105620522	DUP	627318	8	AP003471.2,AP003471.3,DCSTAMP,DPYS,LRP12,MIR548A3,RIMS2,RP11-127H5.1	RIMS2
MDAMB468	1.65	5:166001-257700	DUP	91700	5	CCDC127,CTD-2083E4.7,LRRC14B,PLEKHG4B,SDHA	SDHA
MDAMB468	1.65	8:104513301-105333000	DUP	819700	4	AP001572.1,RIMS2,RP11-1C8.4,snoU13	RIMS2
MDAMB468	1.65	13:111285108-111736061	DUP	450953	7	ANKRD10,ANKRD10-IT1,CARKD,ING1,LINC00346,LINC00431,LINC00567	ING1
MDAMB468	1.64	11:101963201-102699400	DUP	736200	17	BIRC2,BIRC3,MMP1,MMP10,MMP20,MMP27,MMP7,MMP8,RNU6-952P,RP11-315O6.1,RP11-315O6.2,RP11-732A21.2,RP11-817J15.2,RP11-817J15.3,RP11-864G5.3,TMEM123,YAP1	BIRC2,BIRC3,YAP1
MDAMB468	1.64	17:69902901-70469500	DUP	566600	10	AC005152.3,AC007461.1,AC007461.2,LINC00511,LINC01152,RP11-1124B17.1,RP11-57A1.1,RP11-84E24.2,SOX9,SOX9-AS1	SOX9
MDAMB468	1.63	8:104858314-105620523	DUP	762209	9	AP001572.1,AP003471.2,AP003471.3,DCSTAMP,DPYS,LRP12,MIR548A3,RIMS2,RP11-127H5.1	RIMS2
MDAMB468	1.63	13:110347201-110418000	DUP	70800	2	IRS2,LINC00676	IRS2
MDAMB468	1.61	8:101782701-102229400	DUP	446700	12	KB-1410C5.5,KB-1460A1.1,KB-1460A1.3,KB-1460A1.5,RN7SKP249,RN7SL685P,RNU4-83P,RP11-302J23.1,RP11-521I2.3,YWHAZ,Y_RNA,ZNF706	YWHAZ
MDAMB468	1.59	13:110419101-110543200	DUP	124100	1	IRS2	IRS2
MDAMB468	1.58	7:30096901-30432200	DUP	335300	8	AC007036.4,AC007036.5,AC007036.6,AC007285.7,MIR550A1,MTURN,PLEKHA8,ZNRF2	PLEKHA8
MDAMB468	1.58	7:30432901-31315500	DUP	882600	13	AC004691.5,AC005154.6,ADCYAP1R1,AQP1,CRHR2,FAM188B,GARS,GHRHR,GS1-114I9.1,INMT,NOD1,RP4-777O23.1,RP4-777O23.2	NOD1
MDAMB468	1.58	8:101127901-101781200	DUP	653300	18	ANKRD46,AP001205.1,FBXO43,KB-1083B1.1,KB-1615E4.2,KB-1615E4.3,KB-173C10.1,KB-173C10.2,KB-1991G8.1,MIR4471,PABPC1,POLR2K,RNF19A,RNU6-1092P,RNU6ATAC41P,SNX31,SPAG1,Y_RNA	SNX31
MDAMB468	1.58	13:103210401-104109100	DUP	898700	16	BIVM,BIVM-ERCC5,CCDC168,ERCC5,KDELC1,LINC00283,LINC00555,METTL21C,RNY5P8,RP11-123H22.1,RP11-255P5.2,RP11-29B2.5,SLC10A2,TEX30,TPP2,snoU13	ERCC5
MDAMB468	1.58	21:42846901-42955600	DUP	108700	4	AP001610.9,AP006748.1,SNORA32,TMPRSS2	TMPRSS2
MDAMB468	1.57	6:56834101-57532900	DUP	698800	9	BAG2,BEND6,KIAA1586,MIR548U,PRIM2,RAB23,RP1-71H19.2,RP11-203B9.4,ZNF451	RAB23
MDAMB468	1.57	11:111984601-112330400	DUP	345800	13	AP002884.1,AP002884.2,AP002884.3,BCO2,IL18,PLET1,PTS,RNU6-44P,RP11-356J5.12,RP11-356J5.4,RP11-65M17.3,SDHD,TEX12	SDHD
MDAMB468	1.56	1:85453401-86400900	DUP	947500	19	AL590113.1,BCL10,C1orf52,COL24A1,CYR61,DDAH1,MCOLN2,MCOLN3,MIR4423,RNA5SP51,RP11-131L23.1,RP11-131L23.2,RP11-290M5.2,RP11-290M5.4,SNORD81,SYDE2,WDR63,Y_RNA,ZNHIT6	BCL10
MDAMB468	1.56	2:38038901-39412200	DUP	1373300	30	AC009229.5,AC009229.6,AC011247.3,AC016995.3,AC018693.6,AC019171.1,AC074366.3,AC093822.1,ARHGEF33,ATL2,CDKL4,CYP1B1,CYP1B1-AS1,DHX57,GALM,GEMIN6,HNRNPLL,LINC00211,MORN2,RMDN2,RMDN2-AS1,RN7SL96P,RNU6-198P,RNU6-851P,RNU6-951P,RP11-314C9.2,SOS1,SOS1-IT1,SRSF7,Y_RNA	CYP1B1,SOS1
MDAMB468	1.56	5:166778301-169091900	DUP	2313600	25	AC093304.1,CTB-174D11.1,CTB-174D11.2,CTB-178M22.1,CTB-178M22.2,CTB-77H17.1,CTB-78F1.1,CTB-78F1.2,CTC-353G13.1,CTC-558O2.1,CTC-558O2.2,DOCK2,FBLL1,MIR103A1,MIR218-2,MIR585,PANK3,RARS,RNU6-477P,SLIT3,SNORA40,SPDL1,TENM2,WWC1,Y_RNA	TENM2
MDAMB468	1.56	7:22436801-23220700	DUP	783900	15	AC002480.2,AC002480.3,AC002480.4,AC002480.5,AC005082.1,AC005682.5,AC005682.8,AC073072.5,FAM126A,IL6,KLHL7,KLHL7-AS1,SNORD93,STEAP1B,TOMM7	IL6
MDAMB468	1.56	11:56844901-57620600	DUP	775700	27	AP000662.4,AP000781.1,BTBD18,C11orf31,CLP1,CTNND1,LRRC55,MED19,MIR130A,P2RX3,PRG2,PRG3,RN7SKP259,RNA5SP341,RP11-624G17.3,RP11-872D17.4,RTN4RL2,SERPING1,SLC43A1,SLC43A3,SMTNL1,SSRP1,TIMM10,UBE2L6,Y_RNA,ZDHHC5,snoU13	CLP1
MDAMB468	1.56	11:127745001-128737700	DUP	992700	9	ETS1,KCNJ1,RP11-1007G5.2,RP11-264E20.1,RP11-264E20.2,RP11-702B10.1,RP11-702B10.2,RP11-744N12.3,SENCR	ETS1
MDAMB468	1.56	16:56528901-56841300	DUP	312400	18	AC026461.1,BBS2,MT1A,MT1B,MT1E,MT1F,MT1G,MT1H,MT1M,MT1X,MT2A,MT3,MT4,NUP93,RP11-249C24.10,RP11-249C24.11,RP11-343H19.1,RP11-343H19.2	NUP93
MDAMB468	1.56	21:36073501-37141600	DUP	1068100	7	AF015262.2,AF015720.3,AP000330.8,CLIC6,LINC00160,MIR802,RUNX1	RUNX1
MDAMB468	1.55	6:43931801-44613500	DUP	681700	21	AARS2,AL109615.1,AL133262.1,C6orf223,CAPN11,CDC5L,HSP90AB1,MIR4642,MIR4647,MRPL14,NFKBIE,RP1-302G2.5,RP3-449H6.1,RP5-1120P11.1,RP5-1120P11.3,SLC29A1,SLC35B2,SPATS1,TCTE1,TMEM151B,TMEM63B	HSP90AB1
MDAMB468	1.55	7:39551801-41815500	DUP	2263700	20	AC004837.4,AC004837.5,AC004988.1,AC005022.1,AC005027.3,AC005029.1,AC005160.3,AC011290.4,CDK13,INHBA,INHBA-AS1,LINC00265,MPLKIP,RALA,RN7SL496P,RNU6-719P,RP11-467D6.1,SUGCT,YAE1D1,Y_RNA	INHBA
MDAMB468	1.55	13:90875601-92482900	DUP	1607300	7	GPC5,LINC00379,LINC00380,LINC00410,LINC01049,MIR622,RNU6-75P	GPC5
MDAMB468	1.54	11:58461901-60371800	DUP	1909900	50	AP000442.1,AP000442.4,AP000640.10,AP000640.2,AP001257.1,AP001258.4,AP001652.1,DTX4,FAM111A,FAM111B,GIF,GLYAT,GLYATL1,GLYATL2,MIR3162,MPEG1,MRPL16,MS4A1,MS4A12,MS4A13,MS4A14,MS4A2,MS4A3,MS4A4A,MS4A5,MS4A6A,MS4A6E,MS4A7,OOSP1,OOSP2,OR10V1,OR4D10,OR4D11,OR4D6,OR4D9,OR5A1,OR5A2,OR5AN1,OSBP,PATL1,RN7SKP192,RN7SL42P,RN7SL435P,RNU6-779P,RNU7-58P,RP11-1036E20.9,RP11-142C4.6,RP11-736I10.1,RP11-780O24.2,ST…	DTX4,MS4A1
MDAMB468	1.54	11:77635501-78849300	DUP	1213800	22	ALG8,AP002958.1,CTD-2337I7.1,GAB2,KCTD14,KCTD21,KCTD21-AS1,NARS2,NDUFC2,NDUFC2-KCTD14,RNU6-126P,RNU6-311P,RP11-452H21.1,RP11-452H21.2,RP11-452H21.4,RP11-673F18.1,RP11-7I15.3,RP11-7I15.4,RP11-843A23.1,TENM4,THRSP,USP35	ALG8,GAB2
MDAMB468	1.54	11:116689601-117045100	DUP	355500	10	AP000936.2,AP000936.4,APOA1,APOA1-AS,APOA4,APOC3,PAFAH1B2,RNY4P6,SIK3,SIK3-IT1	PAFAH1B2
MDAMB468	1.54	13:102258901-103209500	DUP	950600	11	FGF14,FGF14-AS1,FGF14-AS2,FGF14-IT1,ITGBL1,MIR2681,MIR4705,RNU1-24P,RNY1P2,RP11-397O8.7,RP11-811P12.3	FGF14
MDAMB468	1.54	16:80838701-82149100	DUP	1310400	26	7SK,AC138304.1,ATMIN,BCMO1,C16orf46,CENPN,CMC2,CMIP,GAN,GCSH,HSD17B2,MIR4720,PLCG2,RNU6-1191P,RP11-303E16.2,RP11-303E16.3,RP11-303E16.5,RP11-303E16.6,RP11-303E16.7,RP11-303E16.8,RP11-314O13.1,RP11-391L3.1,RP11-510J16.5,RP11-55K13.1,RP11-960L18.1,SDR42E1	PLCG2
MDAMB468	1.54	19:44293101-44806600	DUP	513500	25	AC067968.3,AC084219.3,AC084219.4,AC115522.3,LYPD5,RN7SL53P,RNU6-902P,RP11-15A1.2,RP11-15A1.3,RP11-15A1.7,ZNF155,ZNF221,ZNF222,ZNF223,ZNF224,ZNF225,ZNF226,ZNF227,ZNF230,ZNF233,ZNF234,ZNF283,ZNF284,ZNF404,ZNF45	ZNF227
MDAMB468	1.53	11:76312401-77630800	DUP	1318400	32	AAMDC,ACER3,AP001189.4,AP002498.1,AP002789.1,AQP11,B3GNT6,CAPN5,CTD-2547H18.1,DKFZP434E1119,GDPD4,LRRC32,MYO7A,OMP,PAK1,RNU7-59P,RP11-21L23.2,RP11-21L23.3,RP11-21L23.4,RP11-672A2.1,RP11-672A2.3,RP11-672A2.4,RP11-672A2.5,RP11-672A2.6,RP11-91P24.5,RP11-91P24.6,RP11-91P24.7,RSF1,RSF1-IT1,RSF1-IT2,TSKU,Y_RNA	PAK1
MDAMB468	1.53	11:109989001-111983800	DUP	1994800	42	ALG9,ALG9-IT1,ARHGAP20,BTG4,C11orf1,C11orf52,C11orf53,C11orf57,C11orf88,COLCA1,COLCA2,CRYAB,DIXDC1,DLAT,FDX1,FDXACB1,HSPB2,LAYN,MIR34B,MIR34C,MIR4491,PIH1D2,POU2AF1,PPP2R1B,RN7SKP273,RNA5SP350,RNA5SP351,RNU2-60P,RNU6-893P,RP11-108O10.2,RP11-347E10.1,RP11-708L7.6,RP11-794P6.1,RP11-794P6.2,RP11-794P6.3,RP11-794P6.6,RP11-89C3.3,RP11-89C3.4,SDHD,SIK2,TIMM8B,ZC3H12C	POU2AF1,SDHD
MDAMB468	1.53	11:117640601-119377800	DUP	1737200	78	ABCG4,ACA64,AMICA1,AP002954.3,AP002954.4,AP002956.1,ARCN1,ATP5L,BCL9L,C1QTNF5,C2CD2L,CBL,CCDC153,CCDC84,CD3D,CD3E,CXCR5,DDX6,DPAGT1,DSCAML1,FOXR1,FXYD2,FXYD6,FXYD6-FXYD2,H2AFX,HINFP,HMBS,HYOU1,IFT46,IL10RA,KMT2A,MCAM,MFRP,MIR3656,MIR4492,MPZL2,MPZL3,Metazoa_SRP,NLRX1,PHLDB1,RN7SL529P,RN7SL688P,RN7SL86P,RNF26,RNU6-1157P,RNU6-262P,RNU6-376P,RP11-110I1.11,RP11-110I1.12,RP11-110I1.13,RP11-110I1.14,RP…	CBL,DDX6,HMBS,KMT2A
MDAMB468	1.53	21:42010001-42845800	DUP	835800	11	AP001610.5,BACE2,BACE2-IT1,DSCAM,FAM3B,LINC00323,MIR3197,MX1,MX2,PLAC4,TMPRSS2	TMPRSS2
MDAMB468	1.52	1:119808201-120697000	DUP	888800	19	ADAM30,HAO2,HAO2-IT1,HMGCS2,HSD3B1,HSD3B2,LINC00622,NOTCH2,PHGDH,REG4,RNU1-75P,RNU6-465P,RP11-114O18.1,RP11-418J17.1,RP11-418J17.3,RP5-1042I8.7,RP5-834N19.1,RP6-42F4.1,ZNF697	HAO2,HSD3B1,NOTCH2,PHGDH,REG4
MDAMB468	1.52	2:7734501-9925500	DUP	2191000	32	AC007463.2,AC011747.3,AC011747.4,AC011747.6,AC011747.7,AC092580.3,AC092580.4,ADAM17,ASAP2,CPSF3,IAH1,ID2,ITGB1BP1,KIDINS220,LINC00298,LINC00299,MBOAT2,RNU4-73P,RP11-214N9.1,RP11-400L8.2,RP11-434B12.1,RP11-521D12.1,RP11-521D12.2,RP11-521D12.5,RP11-734K21.2,RP11-734K21.3,RP11-734K21.4,RP11-734K21.5,U91324.1,YWHAQ,Y_RNA,snoU13	YWHAQ
MDAMB468	1.52	2:27833701-29308200	DUP	1474500	35	AC074011.2,AC074091.13,AC093690.1,AC097724.3,AC104695.3,AC104695.4,AC105398.1,AC110084.1,BRE,C2orf71,CCDC121,FAM179A,FOSL2,GPN1,MIR4263,MRPL33,PLB1,PPP1CB,RBKS,RNA5SP89,RP11-158I13.2,RP11-373D23.2,RP11-373D23.3,RP11-713D19.1,SLC4A1AP,SNORA36,SNORD53,SNORD53_SNORD92,SNORD92,SPDYA,SUPT7L,TRMT61B,WDR43,Y_RNA,ZNF512	PPP1CB
MDAMB468	1.52	2:42340301-43658800	DUP	1318500	18	AC010883.5,AC016735.1,AC016735.2,AC016735.3,AC083949.1,AC093609.1,COX7A2L,EML4,KCNG3,MTA3,OXER1,RNU6-137P,RNU6-242P,RNU6-958P,SNORD75,THADA,Y_RNA,ZFP36L2	EML4
MDAMB468	1.52	2:44817001-46654200	DUP	1837200	18	AC009236.2,AC012354.6,AC016912.3,AC017006.2,AC017006.3,AC067957.1,AC093702.1,CAMKMT,EPAS1,LINC01121,PRKCE,RN7SL414P,RP11-89K21.1,SIX2,SIX3,SIX3-AS1,SRBD1,U51244.2	EPAS1
MDAMB468	1.52	6:117593001-117740900	DUP	147900	5	GOPC,RN7SKP18,RN7SKP51,ROS1,VGLL2	GOPC,ROS1
MDAMB468	1.52	7:29802301-30095500	DUP	293200	6	AC007285.6,FKBP14,PLEKHA8,SCRN1,WIPF3,snoU13	PLEKHA8
MDAMB468	1.52	11:45431601-47206900	DUP	1775300	46	AC024475.1,AMBRA1,ARFGAP2,ARHGAP1,ATG13,C11orf49,C11orf94,CHRM4,CHST1,CKAP5,CREB3L1,CRY2,CTD-2210P24.1,CTD-2210P24.2,CTD-2210P24.3,CTD-2210P24.4,CTD-2210P24.6,CTD-2589M5.4,CTD-2589M5.5,DGKZ,F2,GYLTL1B,HARBI1,LRP4,LRP4-AS1,MAPK8IP1,MDK,MIR3160-1,MIR4688,MIR5582,PACSIN3,PEX16,PHF21A,RP11-390K5.3,RP11-390K5.6,RP11-430H10.4,RP11-495O11.1,RP11-618K13.2,RP11-702F3.1,RP11-702F3.3,RP11-702F3.4,RP11-958J2…	CREB3L1,MAPK8IP1
MDAMB468	1.52	11:47209201-47579700	DUP	370500	20	AC090559.1,AC090559.2,ACP2,CELF1,DDB2,MADD,MIR4487,MYBPC3,NR1H3,PSMC3,RAPSN,RN7SL652P,RN7SL772P,RNU6-1302P,RP11-17G12.2,RP11-17G12.3,RP11-750H9.5,RP11-750H9.7,SLC39A13,SPI1	DDB2
MDAMB468	1.52	16:56842801-57436900	DUP	594100	19	AC012181.1,ARL2BP,CCL22,CETP,CPNE2,CX3CL1,FAM192A,HERPUD1,MIR138-2,NUP93,PLLP,RP11-322D14.2,RP11-325K4.2,RP11-325K4.3,RP11-407G23.1,RP11-407G23.3,RP11-407G23.4,RSPRY1,SLC12A3	HERPUD1,NUP93
MDAMB468	1.52	19:42104901-43636000	DUP	1531100	44	AC004603.4,AC006486.1,AC006486.9,AC010247.1,AC011513.4,AC020956.3,ARHGEF1,CD79A,CEA,CEACAM1,CEACAM3,CEACAM4,CEACAM5,CEACAM6,CEACAM7,CEACAM8,CIC,CNFN,CTB-50E14.4,CTB-59C6.3,CTC-378H22.1,CTC-378H22.2,CXCL17,DEDD2,ERF,GSK3A,LIPE,LIPE-AS1,LYPD4,MEGF8,MIR4323,PAFAH1B3,POU2F2,PRR19,PSG1,PSG11,PSG2,PSG6,PSG8,RNU4-60P,RPS19,SNORD112,ZNF526,ZNF574	CD79A,CIC
MDAMB468	1.52	X:153522101-154114200	DUP	592100	31	ATP6AP1,BX664739.1,CTAG1A,CTAG1B,CTAG2,DKC1,DNASE1L1,EMD,F8,FAM3A,FAM50A,G6PD,GAB3,GDI1,H2AFB1,IKBKG,LAGE3,MPP1,PLXNA3,RN7SL697P,RN7SL742P,SLC10A3,SMIM9,SNORA36A,SNORA56,SNORA70,TEX28,TKTL1,UBL4A,WI2-89031B12.1,XX-FW83128A1.2	DKC1,G6PD
MDAMB468	1.51	1:110244701-112044600	DUP	1799900	59	ADORA3,AHCYL1,AL365361.1,ALX3,ATP5F1,C1orf162,CD53,CEPT1,CHI3L2,CHIA,CSF1,DENND2D,DRAM2,EPS8L3,GSTM1,GSTM2,GSTM3,GSTM5,KCNA10,KCNA2,KCNA3,KCNC4-AS1,LAMTOR5,LAMTOR5-AS1,LRIF1,OVGP1,PIFO,PROK1,RBM15,RNA5SP54,RNU6-792P,RP11-195M16.1,RP11-195M16.3,RP11-284N8.3,RP11-470L19.2,RP11-470L19.5,RP11-552M11.4,RP11-552M11.8,RP11-96K19.2,RP11-96K19.4,RP11-96K19.5,RP4-735C1.4,RP4-735C1.6,RP4-773N10.4,RP4-773N10…	CSF1,GSTM1,RBM15
MDAMB468	1.51	1:116232801-118594200	DUP	2361400	42	AL136376.1,AL157902.3,AL157904.1,AL355794.1,ATP1A1,ATP1A1OS,C1orf137,CASQ2,CD101,CD2,CD58,FAM46C,GDAP2,IGSF3,MAB21L3,MAN1A2,MIR320B1,MIR548AC,MIR942,NHLH2,PTGFRN,RNA5SP55,RNU6-817P,RP11-12L8.1,RP11-159M11.2,RP11-188D8.1,RP11-27K13.3,RP11-39H13.1,RP4-655J12.4,RP4-655J12.5,RP4-753F5.1,RP5-1086K13.1,RP5-1185H19.2,SLC22A15,SNORA40,SPAG17,TTF2,U3,VANGL1,VTCN1,WDR3,Y_RNA	CD58,FAM46C
MDAMB468	1.51	2:29310601-31565900	DUP	2255300	21	AC009305.1,AC009305.2,AC016907.1,AC016907.3,AC073255.1,AC105398.3,AC106870.1,AC106870.2,AC106899.1,AC109642.1,ALK,CLIP4,EHD3,GALNT14,LBH,LCLAT1,RN7SL516P,RNA5SP90,SNORA64,XDH,YPEL5	ALK,YPEL5
MDAMB468	1.51	5:170582301-171795400	DUP	1213100	18	AC008671.1,AC011410.1,AC113342.1,CTB-78H18.1,EFCAB9,FBXW11,FGF18,MIR3912,NPM1,RN7SL339P,SH3PXD2B,SMIM23,SNORA57,SNORA70,STK10,TLX3,UBTD2,snoU13	NPM1,TLX3
MDAMB468	1.51	6:34701101-35626500	DUP	925400	18	AL138721.1,ANKS1A,DEF6,FANCE,FKBP5,PPARD,RP3-329A5.8,RP3-340B19.3,RPL10A,SCUBE3,SNORA40,SNRPC,TAF11,TCP11,TEAD3,TULP1,UHRF1BP1,Y_RNA	FANCE
MDAMB468	1.51	6:35776401-37147000	DUP	1370600	32	BRPF3,C6orf222,C6orf89,CDKN1A,COX6A1P2,CPNE5,ETV7,KCTD20,LHFPL5,MAPK13,MAPK14,MIR3925,MTCH1,PI16,PIM1,PNPLA1,PPIL1,PXT1,RAB44,RN7SL502P,RN7SL748P,RNU1-88P,RP1-179N16.6,RP1-50J22.4,RP1-90K10.4,SLC26A8,SRPK1,SRSF3,STK38,Y_RNA,Z85986.1,Z95152.1	CDKN1A,MAPK13,MAPK14,PIM1,SRSF3
MDAMB468	1.51	6:112229801-112592600	DUP	362800	9	FAM229B,LAMA4,RNU6-1226P,RP1-142L7.5,RP1-142L7.8,RP1-142L7.9,RP11-506B6.6,TUBE1,WISP3	WISP3
MDAMB468	1.51	7:39825001-45840775	DUP	6015774	76	AC004692.4,AC004854.4,AC004951.6,AC004988.1,AC005022.1,AC005027.3,AC005029.1,AC005160.3,AC005537.2,AC010132.10,AC011738.1,AC011738.4,AC013436.6,AC017116.11,AC027269.2,AC073325.1,ADCY1,AEBP1,BLVRA,C7orf25,CAMK2B,CCM2,CDK13,DBNL,DDX56,GLI3,H2AFV,HECW1,HECW1-IT1,INHBA,INHBA-AS1,LINC00265,LINC00957,MIR3943,MIR4649,MIR4657,MPLKIP,MRPL32,MRPS24,MYL7,NACAD,NPC1L1,NUDCD3,OGDH,PGAM2,POLD2,POLM,POLR2J4,PSM…	INHBA
MDAMB468	1.51	11:65643501-67986500	DUP	2343000	99	ACY3,ADRBK1,AIP,ALDH3B2,ANKRD13D,AP001885.1,AP003385.1,AP003419.11,AP003419.16,B3GNT1,BANF1,BRMS1,C11orf68,C11orf72,C11orf80,C11orf86,CABP2,CABP4,CARNS1,CATSPER1,CCDC85B,CCDC87,CCS,CD248,CDK2AP2,CLCF1,CNIH2,CORO1B,CST6,CTC-1337H24.1,CTC-1337H24.2,CTD-3074O7.11,CTD-3074O7.12,CTD-3074O7.2,CTD-3074O7.5,CTSF,CTSW,DPP3,DRAP1,EIF1AD,FOSL1,GAL3ST3,GPR152,GSTP1,KDM2A,KLC2,LRFN4,MIR3163,MRPL11,NDUFV1,NPAS…	AIP,CARNS1,GSTP1,KDM2A,PC,SPTBN2
MDAMB468	1.51	11:83811401-86018000	DUP	2206600	17	AP000857.3,AP000974.1,AP003305.1,C11orf73,CCDC83,CCDC89,CTD-2537O9.1,DLG2,EED,PICALM,RNU6-1292P,RNU6-560P,RP11-12D16.2,RP11-90K17.2,SYTL2,TMEM126B,snoU13	EED,PICALM
MDAMB468	1.51	11:119379601-121354300	DUP	1974700	24	AP000679.2,AP000758.1,AP002348.1,ARHGEF12,CTD-2523D13.1,CTD-2523D13.2,GRIK4,OAF,POU2F3,PVRL1,RNU6-1123P,RP11-196E1.3,RP11-640N11.2,RP11-730K11.1,RP11-778O17.4,RP11-831A10.1,RP11-831A10.2,SC5D,SORL1,TBCEL,TECTA,TMEM136,TRIM29,USP2-AS1	ARHGEF12
MDAMB468	1.51	21:34456401-35445600	DUP	989200	24	AP000289.6,AP000290.7,AP000295.10,AP000295.9,AP000301.1,AP000302.58,AP000304.1,AP000304.12,AP000569.9,C21orf54,CRYZL1,DNAJC28,GART,IFNAR1,IFNAR2,IFNGR2,IL10RB,IL10RB-AS1,ITSN1,LINC00649,MRPS6,RN7SL740P,SON,TMEM50B	GART
MDAMB468	1.51	21:39780101-40829000	DUP	1048900	23	AF064858.10,AF064858.11,AF064858.6,AF064858.7,AF064858.8,AF129408.17,AP001042.1,AP001043.1,AP001044.2,BRWD1,BRWD1-AS1,BRWD1-IT1,BRWD1-IT2,ERG,ETS2,LCA5L,LINC00114,PSMG1,SH3BGR,SNORA62,WRB,Y_RNA,snoU13	ERG
MDAMB468	1.5	2:47483401-47983500	DUP	500100	11	AC073283.4,AC138655.1,AC138655.4,AC138655.6,BCYRN1,EPCAM,KCNK12,MIR559,MSH2,MSH6,RN7SKP119	EPCAM,MSH2,MSH6
MDAMB468	1.5	6:42492101-43931000	DUP	1438900	49	ABCC10,C6orf226,CNPY3,CRIP3,CUL7,CUL9,DLK2,DNPH1,GLTSCR1L,GNMT,KLHDC3,LRRC73,MAD2L1BP,MEA1,MRPL2,MRPS18A,PEX6,POLH,POLR1C,PPP2R5D,PRPH2,PTCRA,PTK7,RN7SL403P,RNU6-1113P,RNU6-890P,RP1-20C7.6,RP1-261G23.5,RP1-261G23.7,RP11-344J7.2,RP11-387M24.5,RP3-330M21.5,RP3-337H4.10,RP3-337H4.8,RP3-337H4.9,RP3-475N16.1,RPL7L1,RRP36,RSPH9,SCARNA15,SLC22A7,SRF,TBCC,TJAP1,TTBK1,UBR2,XPO5,YIPF3,ZNF318	CUL9,POLH,PTK7,SRF
MDAMB468	1.5	6:125180901-126092700	DUP	911800	9	HDDC2,HEY2,RNF217,RP1-293L8.2,RP11-138M12.1,RP11-510H23.1,RP11-624M8.1,RP11-735G4.1,TPD52L1	RP11-510H23.1
MDAMB468	1.5	7:25253501-26323200	DUP	1069700	14	AC003090.1,AC003985.1,AC004520.1,AC091705.1,AC091705.2,CBX3,CTB-119C2.1,CTD-2227E11.1,HNRNPA2B1,MIR148A,NFE2L3,NPVF,RP5-978I12.1,U3	NFE2L3
MDAMB468	1.5	7:27697801-28952200	DUP	1254400	8	AC004549.6,CREB5,HIBADH,JAZF1,JAZF1-AS1,RN7SL365P,RNU6-979P,TAX1BP1	JAZF1
MDAMB468	1.5	7:50150801-50370600	DUP	219800	6	AC020743.2,AC020743.3,AC020743.4,C7orf72,IKZF1,ZPBP	IKZF1
MDAMB468	1.5	11:69178301-69717800	DUP	539500	12	AP000439.1,AP000439.2,AP000439.3,AP000439.5,AP001888.1,CCND1,FGF19,FGF3,FGF4,ORAOV1,RP11-211G23.1,RP11-211G23.2	CCND1,FGF19,FGF3,FGF4
MDAMB468	1.5	11:106891301-108878800	DUP	1987500	25	ACAT1,ALKBH8,AP000889.3,AP001024.1,AP001024.2,AP001925.1,AP002353.1,AP005718.1,ATM,C11orf65,CUL5,CWF19L2,DDX10,ELMOD1,EXPH5,KDELC2,NPAT,RAB39A,RNU6-654P,RP11-144G7.2,RP11-25I9.2,RP11-819C21.1,SLC35F2,SLN,Y_RNA	ATM,DDX10
MDAMB468	1.5	19:41443377-41511375	DUP	67998	2	AC092071.1,CYP2B6	CYP2B6
MDAMB468	1.49	1:59197201-59516700	DUP	319500	7	AL136985.1,JUN,LINC01135,RP11-63G10.2,RP11-63G10.3,RP4-794H19.1,RP4-794H19.4	JUN
MDAMB468	1.49	11:57821201-58458000	DUP	636800	19	AP000445.3,AP001350.1,CNTF,GLYAT,OR10Q1,OR10W1,OR1S1,OR1S2,OR5B12,OR5B17,OR5B2,OR5B21,OR5B3,OR9I1,OR9Q1,OR9Q2,RP11-655C2.3,RP11-659P15.1,ZFP91	ZFP91
MDAMB468	1.49	11:117049901-117639600	DUP	589700	10	AP000892.4,BACE1,CEP164,DSCAML1,PCSK7,RNF214,RP11-35P15.1,SCARNA11,SIDT2,TAGLN	PCSK7
MDAMB468	1.49	11:125206901-127245300	DUP	2038400	52	ACRV1,AP000708.1,CDON,CHEK1,CTD-2234N14.1,CTD-2234N14.2,DCPS,DDX25,EI24,FAM118B,FEZ1,FOXRED1,HYLS1,KIRREL3,KIRREL3-AS1,KIRREL3-AS2,KIRREL3-AS3,MIR3167,PATE1,PATE2,PATE3,PATE4,PKNOX2,PUS3,RN7SL351P,RNU2-35P,RNU4-86P,RNU6-1156P,RP11-115C10.1,RP11-168K9.1,RP11-168K9.2,RP11-480C22.1,RP11-50B3.2,RP11-50B3.4,RP11-673E11.2,RP11-680F20.10,RP11-680F20.11,RP11-680F20.12,RP11-680F20.4,RP11-680F20.5,RP11-680…	CDON,CHEK1,FAM118B
MDAMB468	1.48	1:46200801-47241700	DUP	1040900	24	ATPAF1,CYP4B1,DMBX1,EFCAB14,EFCAB14-AS1,FAAH,IPP,LINC00505,LRRC41,LURAP1,MAST2,MKNK1-AS1,MOB3C,NSUN4,PIK3R3,POMGNT1,RAD54L,RP11-322N21.2,RP4-533D7.4,RP4-533D7.5,RP5-1109J22.2,TEX38,TSPAN1,UQCRH	PIK3R3
MDAMB468	1.48	1:63888201-66008200	DUP	2120000	31	AK4,ALG6,CACHD1,DLEU2L,DNAJC6,EFCAB7,ITGB3BP,JAK1,LEPR,LEPROT,MIR101-1,MIR3671,MIR4794,PGM1,RAVER2,RN7SL130P,RN7SL488P,RNU2-15P,RNU6-1176P,RNU6-809P,RNU7-123P,RNU7-62P,ROR1,RP11-182I10.3,RP11-24J23.2,RP4-535B20.1,RP4-535B20.4,RP4-630A11.3,RP5-1044H5.1,UBE2U,Y_RNA	CACHD1,JAK1
MDAMB468	1.48	2:24031201-24640200	DUP	609000	15	AC008073.7,AC008073.9,AC009228.1,ATAD2B,C2orf44,FAM228B,FKBP1B,MFSD2B,PFN4,RN7SL610P,RNU6-370P,SCARNA21,SF3B14,TP53I3,UBXN2A	C2orf44
MDAMB468	1.48	2:24641001-26185200	DUP	1544200	25	AC010150.2,AC012074.2,AC012457.2,AC104699.1,ADCY3,ASXL2,CENPO,DNAJC27,DNAJC27-AS1,DNMT3A,DTNB,EFR3B,KIF3C,MIR1301,NCOA1,POMC,PTRHD1,RN7SL856P,RNA5SP88,RNU6-936P,RP11-443B20.1,RP11-458N5.1,RP11-509E16.1,SNORD14,Y_RNA	ASXL2,DNMT3A
MDAMB468	1.48	5:176535001-176944900	DUP	409900	13	DBN1,DOK3,F12,GRK6,LMAN2,PFN3,PRELID1,PRR7,PRR7-AS1,RGS14,RN7SL562P,RP11-1334A24.6,SLC34A1	PRELID1
MDAMB468	1.48	6:32625801-33026700	DUP	400900	15	AL645941.1,BRD2,BRD2-IT1,HLA-DOA,HLA-DQA2,HLA-DQB1-AS1,HLA-DQB2,MIR3135B,PSMB9,TAP2,TAPSAR1,XXbac-BPG181M17.5,XXbac-BPG181M17.6,XXbac-BPG254F23.6,XXbac-BPG254F23.7	BRD2
MDAMB468	1.48	6:40177601-42491500	DUP	2313900	54	AL035588.1,AL136967.1,APOBEC2,BYSL,C6orf132,CCND3,FOXP4,FRS3,GUCA1A,GUCA1B,LINC00951,LRFN2,MDFI,MED20,MIR4641,MRPS10,NCR2,NFYA,PGC,RNA5SP207,RNU6-250P,RNU6-643P,RNU6-761P,RP1-139D8.6,RP11-121P10.1,RP11-298J23.5,RP11-298J23.8,RP11-298J23.9,RP11-328M4.2,RP11-328M4.3,RP11-533O20.2,RP11-552E20.1,RP11-552E20.4,RP11-570K4.1,RP11-7K24.3,RP3-462C17.1,RP5-973N23.4,SNORA8,TAF8,TDRG1,TFEB,TOMM6,TREM1,TREM2,…	CCND3,FOXP4
MDAMB468	1.48	7:2596301-3044100	DUP	447800	7	AC004906.3,AMZ1,CARD11,GNA12,IQCE,RN7SKP130,TTYH3	CARD11,GNA12
MDAMB468	1.48	7:26907601-27239100	DUP	331500	24	AC004079.1,HOTAIRM1,HOTTIP,HOXA-AS2,HOXA-AS3,HOXA1,HOXA10,HOXA10-AS,HOXA11,HOXA11-AS,HOXA13,HOXA2,HOXA3,HOXA4,HOXA5,HOXA6,HOXA7,HOXA9,MIR196B,RP1-170O19.14,RP1-170O19.20,RP1-170O19.21,RP1-170O19.22,RP1-170O19.23	HOXA11,HOXA13,HOXA3,HOXA9
MDAMB468	1.48	11:69788801-71979400	DUP	2190600	58	ANAPC15,ANO1,ANO1-AS1,ANO1-AS2,AP000487.4,AP000487.5,AP000487.6,AP000719.1,AP000867.1,AP001271.3,AP002490.1,AP002495.1,AP003498.1,AP003498.2,CTA-797E19.1,CTA-797E19.2,CTD-2313N18.5,CTTN,DEFB108B,DHCR7,FADD,FAM86C1,FOLR1,FOLR2,IL18BP,INPPL1,KRTAP5-10,KRTAP5-11,KRTAP5-7,KRTAP5-8,KRTAP5-9,LAMTOR1,LRTOMT,MIR3165,MIR3664,MIR548K,PHOX2A,PPFIA1,RNA5SP342,RNF121,RNU6-1175P,RNU6-292P,RP11-167J8.3,RP11-626…	FADD,FOLR2
MDAMB468	1.48	11:100999601-101962600	DUP	963000	7	ANGPTL5,C11orf70,KIAA1377,MIR3920,PGR,TRPC6,snoU13	PGR
MDAMB468	1.48	16:85591501-86006200	DUP	414700	14	C16orf74,COX4I1,CTD-2542L18.1,GINS2,GSE1,IRF8,MIR1910,RN7SL381P,RNU1-103P,RP11-118F19.1,RP11-542M13.3,RP11-568J23.4,RP11-568J23.5,RP11-568J23.6	IRF8
MDAMB468	1.48	17:71370801-73875400	DUP	2504600	88	AC100787.1,AC103809.1,AC103809.2,AC125421.1,ARMC7,BTBD17,C17orf77,CASKIN2,CD300A,CD300C,CD300E,CD300LB,CD300LD,CD300LF,CDR2L,CTD-2006K23.1,CTD-2006K23.2,CTD-2514K5.2,CTD-2514K5.4,CTD-2532D12.4,CTD-2532D12.5,CTD-2582D11.1,DNAI2,FADS6,GALK1,GGA3,GPRC5C,GRB2,GRIN2C,H3F3B,HN1,ICT1,ITGB4,KCTD2,KIAA0195,KIF19,LINC00469,LLGL2,MIF4GD,MIR3615,MIR3678,MIR4738,MRPS7,MYO15B,NAT9,NT5C,NUP85,RAB37,RN7SL573P,RN…	GRB2
MDAMB468	1.48	17:75928701-76638800	DUP	710100	23	AC061992.1,AC061992.2,AC087645.1,AFMID,BIRC5,C17orf99,CTD-2357A8.3,DNAH17-AS1,PGS1,RN7SL236P,RN7SL454P,RNU6-625P,RP11-219G17.4,RP11-559N14.5,RP11-806H10.4,SNORA30,SOCS3,SYNGR2,TK1,TMC6,TMC8,TMEM235,TNRC6C	BIRC5,SOCS3,TK1
MDAMB468	1.48	19:43902501-44292100	DUP	389600	19	AC006953.1,CADM4,ETHE1,IRGC,IRGQ,KCNN4,L34079.2,L34079.3,L34079.4,LYPD3,PLAUR,RN7SL368P,SMG9,SRRM5,TEX101,XRCC1,ZNF428,ZNF575,ZNF576	XRCC1
MDAMB468	1.47	1:47242401-48948800	DUP	1706400	31	AL109659.1,AL356458.1,AL591415.1,CMPK1,CYP4A11,CYP4A22,CYP4A22-AS1,CYP4B1,CYP4X1,CYP4Z1,FLJ00388,FOXD2,FOXD2-AS1,FOXE3,LINC00853,PDZK1IP1,RNU4-61P,RNU6-723P,RP1-18D14.7,RP11-193P11.3,RP11-330M19.1,RP11-511I2.2,RP11-543D5.1,RP11-543D5.2,RP4-683M8.2,RP5-1024N4.2,RP5-1024N4.4,SPATA6,STIL,TAL1,TRABD2B	TAL1
MDAMB468	1.47	1:77910701-78649100	DUP	738400	15	AK5,DNAJB4,FAM73A,FUBP1,GIPC2,NEXN,NEXN-AS1,RN7SL370P,RNA5SP20,RNA5SP21,RNA5SP22,RNU6-1102P,RP11-386I14.4,USP33,ZZZ3	FUBP1
MDAMB468	1.47	1:93233101-93640400	DUP	407300	14	AC093577.1,EVI5,FAM69A,MTF2,RN7SKP123,RN7SL692P,RNU6-210P,RNU6-970P,RPL5,SNORA51,SNORA66,SNORD21,TMED5,Y_RNA	RPL5
MDAMB468	1.47	1:115254301-116230200	DUP	975900	14	AL512638.1,CSDE1,NGF,NRAS,RN7SL420P,RP4-663N10.1,RP4-666F24.3,SIKE1,SNORA42,SYCP1,TSHB,TSPAN2,VANGL1,Y_RNA	NRAS
MDAMB468	1.47	2:26823101-27833000	DUP	1009900	42	AC013472.3,AC013472.4,AC015977.6,AC074091.1,AC074117.10,AC109828.1,AC109829.1,AGBL5,AGBL5-AS1,AGBL5-IT1,ATRAID,C2orf16,C2orf53,CAD,CENPA,CIB4,DNAJC5G,DPYSL5,EIF2B4,EMILIN1,FNDC4,GCKR,GTF3C2,IFT172,KCNK3,KHK,KRTCAP3,MAPRE3,MPV17,NRBP1,OST4,PPM1G,RNU6-986P,RP11-158I13.2,RP11-195B17.1,RP11-503P10.1,SNX17,TCF23,TRIM54,UCN,ZNF512,ZNF513	CAD
MDAMB468	1.47	6:33029201-34202800	DUP	1173600	39	AL590403.1,B3GALT4,BAK1,COL11A2,DAXX,GGNBP1,GRM4,HCG24,HCG25,HLA-DPA1,HLA-DPB1,HSD17B8,IP6K3,ITPR3,KIFC1,LEMD2,LINC00336,LINC01016,MIR1275,MIR219-1,MIR3934,MIR5004,MLN,PFDN6,PHF1,RGL2,RING1,RN7SL26P,RNY4P10,RP3-468B3.2,RPS18,RXRB,SBP1,SLC39A7,TAPBP,VPS52,XXbac-BPG157A10.21,ZBTB22,ZBTB9	DAXX,ITPR3,PHF1,RXRB
MDAMB468	1.47	6:34206201-34649600	DUP	443400	10	BX255972.1,C6orf1,C6orf106,HMGA1,NUDT3,PACSIN1,RP11-513I15.6,RPS10,RPS10-NUDT3,SPDEF	HMGA1
MDAMB468	1.47	6:37852601-40176700	DUP	2324100	22	AL031905.1,BTBD9,BTBD9-AS1,DAAM2,DNAH8,GLO1,GLP1R,KCNK16,KCNK17,KCNK5,KIF6,RN7SL465P,RNU1-54P,RNU1-87P,RP1-207H1.3,RP11-61I13.3,RP3-503A6.2,SAYSD1,SNORA8,SNORD45,Y_RNA,ZFAND3	KCNK17
MDAMB468	1.47	6:52059501-54116200	DUP	2056700	36	AL591034.1,ELOVL5,FBXO9,GCM1,GSTA1,GSTA2,GSTA3,GSTA4,GSTA5,ICK,KLHL31,MCM3,MIR5685,MLIP,MLIP-AS1,MLIP-IT1,PAQR8,RN7SK,RN7SKP256,RN7SL244P,RNU1-136P,RNU6-464P,RP1-27K12.2,RP1-27K12.4,RP11-345L23.1,RP11-411K7.1,RP11-506E9.3,RP11-79N23.1,RP13-476E20.1,RP3-483K16.4,RP3-523E19.2,TMEM14A,TRAM2,TRAM2-AS1,U3,Y_RNA	ICK
MDAMB468	1.47	7:6130501-6651500	DUP	521000	12	AC004895.4,AC079742.4,C7orf26,CYTH3,FAM220A,FLJ20306,GRID2IP,KDELR2,RAC1,USP42,Y_RNA,ZDHHC4	RAC1
MDAMB468	1.47	8:104875865-105987744	DUP	1111879	9	AC012564.1,AP003471.2,AP003471.3,DCSTAMP,DPYS,LRP12,MIR548A3,RIMS2,RP11-127H5.1	RIMS2
MDAMB468	1.47	10:43463201-44204900	DUP	741700	22	CSGALNACT2,FXYD4,HNRNPF,MIR5100,RASGEF1A,RET,RNU6ATAC11P,RNU7-193P,RP11-124O11.2,RP11-168L22.2,RP11-351D16.3,RP11-402L1.11,RP11-402L1.4,RP11-517P14.2,U3,ZNF239,ZNF32,ZNF32-AS1,ZNF32-AS2,ZNF32-AS3,ZNF485,ZNF487	RASGEF1A,RET
MDAMB468	1.47	11:87786701-88889900	DUP	1103200	11	AP001482.1,CTSC,GRM5,GRM5-AS1,MIR3166,RAB38,RNU6-16P,RP11-164N3.1,RP11-164N3.2,RP11-164N3.3,Y_RNA	GRM5
MDAMB468	1.47	11:106509601-106579800	DUP	70200	1	GUCY1A2	GUCY1A2
MDAMB468	1.47	11:112331001-114428200	DUP	2097200	34	ANKK1,AP000908.1,C11orf71,CLDN25,DRD2,HTR3A,HTR3B,MIR4301,NCAM1,NCAM1-AS1,NNMT,NXPE1,RBM7,REXO2,RNU6-1107P,RNU7-187P,RP11-159N11.3,RP11-159N11.4,RP11-27G22.1,RP11-629G13.1,RP11-64D24.2,RP11-64D24.4,RP11-65M17.1,RP11-65M17.3,RP11-667M19.10,RP11-667M19.2,RP11-839D17.3,TMPRSS5,TTC12,USP28,ZBTB16,ZW10,snoU13,snosnR66	ZBTB16
MDAMB468	1.47	17:66485701-67142100	DUP	656400	13	ABCA6,ABCA8,ABCA9,ABCA9-AS1,AC011591.1,AC079210.1,FAM20A,MIR4524B,PRKAR1A,RP11-118B18.1,RP11-118B18.2,RP11-120M18.2,RP11-120M18.5	PRKAR1A
MDAMB468	1.47	17:77630501-79082500	DUP	1452000	38	AC100791.2,AC127496.1,BAIAP2-AS1,CARD14,CBX2,CBX4,CBX8,CCDC40,CHMP6,CTD-2047H16.2,CTD-2047H16.4,CTD-2116F7.1,CTD-2526A2.2,CTD-2529O21.1,CTD-2529O21.2,CTD-2561B21.10,CTD-2561B21.11,CTD-2561B21.3,CTD-2561B21.4,CTD-2561B21.5,CTD-2561B21.7,EIF4A3,ENPP7,GAA,MIR4730,MIR4739,RNF213,RP11-28G8.1,RP11-334C17.5,RP11-353N14.1,RP11-353N14.2,RP11-353N14.3,RP11-353N14.4,RP11-353N14.5,SGSH,SLC26A11,TBC1D16,snoU13	CBX8,RNF213
MDAMB468	1.47	19:18943601-19798200	DUP	854600	31	AC002306.1,AC004447.2,AC005197.2,AC005932.1,ARMC6,CERS1,CILP2,COPE,CTB-184G21.3,CTC-260F20.3,DDX49,GATAD2A,GDF1,GMIP,HAPLN4,HOMER3,LPAR2,MAU2,MEF2B,MEF2BNB-MEF2B,MIR640,NCAN,NR2C2AP,RFXANK,RN7SL70P,RNU6-1028P,SLC25A42,TMEM161A,UPF1,YJEFN3,ZNF101	GMIP,MEF2B
MDAMB468	1.47	19:33685801-35758700	DUP	2072900	60	AC002128.5,AC008747.1,AC010504.2,AC020907.1,AC020910.1,AD000684.2,CEBPA,CEBPA-AS1,CEBPG,CHST8,CTC-523E23.1,CTC-523E23.11,CTC-523E23.14,CTC-523E23.15,CTC-523E23.4,CTC-523E23.5,CTC-523E23.6,CTC-523E23.8,CTD-2329C7.2,CTD-2527I21.14,CTD-2527I21.4,CTD-2527I21.7,CTD-2527I21.9,CTD-2540B15.11,CTD-2540B15.12,CTD-2540B15.13,CTD-2540B15.6,CTD-2540B15.7,CTD-2540B15.9,CTD-2553L13.4,CTD-2588C8.8,FAM187B,FXYD1,…	CEBPA
MDAMB468	1.47	19:39549501-40371500	DUP	822000	35	AC011500.1,AC093063.3,CLC,CTB-60E11.4,CTB-60E11.9,CTC-218B8.3,CTC-246B18.10,CTC-246B18.8,DYRK1B,EID2,EID2B,FBL,FCGBP,GMFG,IFNL1,IFNL2,IFNL3,LEUTX,LGALS13,LGALS14,LGALS16,LRFN1,MIR4530,NCCRP1,PAF1,PAK4,PLEKHG2,RN7SL566P,RPS16,SAMD4B,SELV,SUPT5H,SYCN,TIMM50,ZFP36	DYRK1B,PAF1,PAK4
MDAMB468	1.47	21:39590901-39779300	DUP	188400	4	AP001422.3,AP001434.2,ERG,KCNJ15	ERG
MDAMB468	1.46	2:32688101-32803800	DUP	115700	2	BIRC6,MIR558	BIRC6
MDAMB468	1.46	2:39412601-41318800	DUP	1906200	11	AC007246.3,AC007317.1,AC007377.1,CDKL4,MAP4K3,RNU6-1185P,RP11-449G16.1,SLC8A1,SLC8A1-AS1,SNORA67,TMEM178A	MAP4K3
MDAMB468	1.46	5:179066701-180329800	DUP	1263100	34	AC122714.1,AC136604.1,BTNL8,C5orf45,CANX,CBY3,CNOT6,CTB-129O4.1,CTC-205M6.5,CTC-241N9.1,CTC-563A5.2,CTC-573N18.1,FLT4,GFPT2,LINC00847,MAML1,MAPK9,MGAT1,MGAT4B,MIR1229,MIR340,OR2Y1,RASGEF1C,RN7SKP150,RNF130,RNU1-17P,RNU6-525P,RP11-1379J22.5,RP11-451H23.3,SCGB3A1,SQSTM1,TBC1D9B,Y_RNA,ZFP62	FLT4,MAML1,MAPK9
MDAMB468	1.46	6:106272201-107167800	DUP	895600	15	AIM1,ATG5,PRDM1,QRSL1,RN7SKP211,RN7SL47P,RNA5SP211,RNU6-344P,RNU6-527P,RP1-134E15.3,RP1-60O19.1,RP1-60O19.2,RP11-404H14.1,RTN4IP1,Y_RNA	ATG5,PRDM1
MDAMB468	1.46	6:117742701-118391900	DUP	649200	8	AL132671.1,DCBLD1,GOPC,NUS1,RNU6-253P,ROS1,RP1-92C8.3,SLC35F1	GOPC,ROS1
MDAMB468	1.46	6:136675701-138758200	DUP	2082500	31	7SK,AL357060.1,HEBP2,IFNGR1,IL20RA,IL22RA2,KIAA1244,MAP3K5,MAP7,MIR3145,NHSL1,OLIG3,PBOV1,PERP,PEX7,RNA5SP219,RP11-10J5.1,RP11-204P2.3,RP11-240M16.1,RP11-356I2.1,RP11-356I2.4,RP11-55K22.5,RP11-95M15.1,RP3-325F22.3,RP3-325F22.5,RP3-422G23.4,SLC35D3,SNORA27,SNORD112,TNFAIP3,Y_RNA	MAP3K5,TNFAIP3
MDAMB468	1.46	7:3044801-3071400	DUP	26600	1	CARD11	CARD11
MDAMB468	1.46	7:18126801-19534500	DUP	1407700	11	AC003986.5,AC003986.6,AC003986.7,AC004744.3,AC007091.1,AC010082.2,AC091697.1,FERD3L,HDAC9,MIR1302-6,RN7SKP266	HDAC9
MDAMB468	1.46	11:133736301-134605100	DUP	868800	18	ACAD8,AP000911.1,AP004550.1,GLB1L2,GLB1L3,IGSF9B,JAM3,MIR4697,NCAPD3,RP11-469N6.2,RP11-469N6.3,RP11-627G23.1,RP11-700F16.3,RP11-713P17.3,RP11-713P17.4,RP11-713P17.5,THYN1,VPS26B	NCAPD3
MDAMB468	1.46	17:74236801-75927800	DUP	1691000	48	AANAT,CTD-2246P4.1,CYGB,FLJ45079,JMJD6,LINC00338,LINC00868,METTL23,MFSD11,MGAT5B,MIR4316,MIR636,MXRA7,PRCD,PRPSAP1,QRICH2,RNU1-80P,RNU4-47P,RNU6-227P,RNU6-24P,RNU6-97P,RP11-13K12.1,RP11-13K12.2,RP11-13K12.5,RP11-285E9.5,RP11-285E9.6,RP11-316M20.1,RP11-318A15.2,RP11-318A15.7,RP11-666A8.12,RP11-666A8.7,RP11-666A8.8,RP11-666A8.9,RP11-75C10.7,RP11-75C10.9,RP11-87G24.3,RP11-87G24.6,RP11-936I5.1,SEC14L…	SRSF2
MDAMB468	1.45	1:43620401-44805200	DUP	1184800	36	AL390776.1,ARTN,ATP6V0B,B4GALT2,C1orf210,CDC20,DMAP1,DPH2,EBNA1BP2,ELOVL1,ERI3,ERI3-IT1,FAM183A,HYI-AS1,IPO13,KDM4A,KDM4A-AS1,KLF17,MED8,MPL,PTPRF,RN7SL479P,RNA5SP46,RNU6-1058P,RP1-92O14.3,RP1-92O14.6,RP11-184I16.4,RP11-7O11.3,RP5-1198O20.4,SLC6A9,SZT2,SZT2-AS1,TIE1,TMEM125,WDR65,Y_RNA	MPL,TIE1
MDAMB468	1.45	1:113800101-115252600	DUP	1452500	19	AMPD1,AP4B1,AP4B1-AS1,BCAS2,DCLRE1B,DENND2C,HIPK1,MAGI3,NRAS,OLFML3,PHTF1,PTPN22,RN7SL432P,RP4-543J13.1,RP5-1073O3.2,RP5-1073O3.7,RSBN1,TRIM33,Y_RNA	NRAS,TRIM33
MDAMB468	1.45	2:32337301-32685000	DUP	347700	9	AL133245.2,BIRC6,BIRC6-AS1,NLRC4,RNU6-647P,RP11-563N4.1,SLC30A6,SPAST,YIPF4	BIRC6
MDAMB468	1.45	3:97120801-97213200	DUP	92400	1	EPHA6	EPHA6
MDAMB468	1.45	5:176389601-176533800	DUP	144200	4	FGFR4,UIMC1,ZNF346,ZNF346-IT1	FGFR4
MDAMB468	1.45	6:129608301-129946000	DUP	337700	5	ARHGAP18,LAMA2,RNU6-861P,RP1-69D17.3,RP1-69D17.4	LAMA2
MDAMB468	1.45	11:55041001-56793000	DUP	1752000	49	AP000479.1,AP002517.1,OR10AG1,OR4A15,OR4A16,OR4C11,OR4C15,OR4C16,OR4C6,OR4P4,OR4S2,OR5AK2,OR5AP2,OR5AR1,OR5AS1,OR5D13,OR5D14,OR5D16,OR5D18,OR5F1,OR5I1,OR5J2,OR5L1,OR5L2,OR5M1,OR5M10,OR5M11,OR5M3,OR5M8,OR5M9,OR5R1,OR5T1,OR5T2,OR5T3,OR5W2,OR8H1,OR8H2,OR8H3,OR8I2,OR8J1,OR8J3,OR8K1,OR8K3,OR8K5,OR8U1,OR9G1,OR9G4,RP11-674C21.9,TRIM51	OR5L1
MDAMB468	1.45	13:92483401-93037500	DUP	554100	3	GPC5,GPC5-AS2,RNU4ATAC3P	GPC5
MDAMB468	1.45	13:93038101-93191000	DUP	152900	3	GPC5,GPC5-IT1,MIR548AS	GPC5
MDAMB468	1.45	16:50020001-51594900	DUP	1574900	38	AC009166.5,ADCY7,BRD7,CNEP1R1,CTD-2034I21.1,CTD-2034I21.2,CYLD,HEATR3,NKD1,NOD2,PAPD5,RNA5SP426,RNY4P3,RP11-21B23.1,RP11-21B23.2,RP11-21B23.3,RP11-327F22.1,RP11-327F22.2,RP11-327F22.4,RP11-327F22.5,RP11-327F22.6,RP11-401P9.1,RP11-401P9.4,RP11-401P9.5,RP11-401P9.6,RP11-429P3.3,RP11-429P3.5,RP11-437L7.1,RP11-883G14.1,RP11-883G14.2,RP11-883G14.3,RP11-883G14.4,SALL1,SNORA70,SNORD112,SNX20,hsa-mir-318…	CYLD
MDAMB468	1.45	19:35760701-36840200	DUP	1079500	66	AC002115.5,AC002115.9,AC002116.7,AC002398.11,AC002398.12,AC002398.13,AC002398.5,AC002511.1,AC002511.2,AC002511.3,AC092296.1,AD000090.2,AD001527.7,AF038458.3,AF038458.5,ALKBH6,APLP1,ARHGAP33,ATP4A,C19orf55,CAPNS1,CD22,CLIP3,COX6B1,COX7A1,CTD-3162L10.1,ETV2,FFAR1,FFAR2,FFAR3,GAPDHS,GPR42,HAMP,HCST,HSPB6,IGFLR1,KIRREL2,KMT2B,KRTDAP,LINC00665,LRFN3,MAG,MIR5196,NPHS1,OVOL3,PSENEN,RBM42,RN7SL287P,RN7SL…	CD22,KMT2B,ZBTB32
MDAMB468	1.45	X:152954601-153429600	DUP	475000	24	ABCD1,ARHGAP4,BCAP31,HCFC1,HCFC1-AS1,IDH3G,IRAK1,L1CAM,LCA10,MECP2,MIR3202-1,MIR718,NAA10,OPN1LW,PDZD4,PLXNB3,RENBP,SLC6A8,SNORD36,SRPK3,SSR4,TEX28P2,TMEM187,U52111.14	ARHGAP4
MDAMB468	1.44	1:23474001-24029900	DUP	555900	17	ASAP3,C1orf213,E2F2,HNRNPR,HTR1D,ID3,LUZP1,MDS2,RNU6-135P,RNU6-514P,RP1-150O5.3,RP5-1057J7.6,RP5-1057J7.7,RPL11,TCEA3,Y_RNA,ZNF436	ID3,MDS2
MDAMB468	1.44	1:25622301-26995700	DUP	1373400	47	AIM1L,AL020996.1,AL031284.1,AL033528.1,AL391650.1,AUNIP,CATSPER4,CD52,CNKSR1,EXTL1,FAM110D,HMGN2,LDLRAP1,LIN28A,MAN1C1,MIR1976,MIR3917,MTFR1L,PAFAH2,PAQR7,PDIK1L,RHCE,RN7SL490P,RN7SL679P,RNU6-110P,RNU6-1171P,RP1-125I3.2,RP1-187B23.1,RP1-317E23.3,RP1-317E23.7,RP11-70P17.1,RP11-96L14.7,RP3-476K8.3,SCARNA17,SCARNA18,SEPN1,SH3BGRL3,SLC30A2,STMN1,TMEM50A,TMEM57,TRIM63,UBXN11,Y_RNA,ZNF593,ZNF683,snoU13	CD52
MDAMB468	1.44	1:51145401-53262500	DUP	2117100	47	AL162430.1,AL162430.2,AL589663.1,BTF3L4,C1orf185,CC2D1B,CDKN2C,COA7,EPS15,FAF1,FAM159A,GPX7,KTI12,MIR4421,MIR761,NRD1,ORC1,OSBPL9,PRPF38A,RAB3B,RN7SL290P,RN7SL62P,RN7SL788P,RNA5SP48,RNF11,RNU2-30P,RNU6-1253P,RNU6-1281P,RNU6-877P,RP11-155O18.6,RP11-191G24.1,RP11-253A20.1,RP11-25O10.2,RP11-275F13.1,RP11-296A18.3,RP11-296A18.6,RP11-91A18.4,RP4-657D16.3,RP4-657D16.6,SNORA26,TTC39A,TXNDC12,TXNDC12-AS1…	CDKN2C,EPS15,FAF1
MDAMB468	1.44	1:97956801-98611800	DUP	655000	5	DPYD,DPYD-AS2,MIR137HG,RP11-272L13.3,RP11-490G2.2	DPYD
MDAMB468	1.44	1:156527101-157005500	DUP	478400	27	AL365181.1,APOA1BP,ARHGEF11,BCAN,CRABP2,GPATCH4,HAPLN2,HDGF,INSRR,IQGAP3,ISG20L2,LRRC71,MIR765,MRPL24,NES,NTRK1,PRCC,RN7SL612P,RP11-284F21.10,RP11-284F21.11,RP11-284F21.7,RP11-284F21.9,RP11-66D17.3,RP11-66D17.5,RRNAD1,SH2D2A,TTC24	CRABP2,NTRK1
MDAMB468	1.44	2:47984201-49577100	DUP	1592900	14	AC079807.2,AC079807.4,FOXN2,FSHR,GTF2A1L,LHCGR,MSH6,RN7SKP224,RNU4-49P,RNU6-282P,RNU6-439P,RNU6-688P,RP11-191L17.1,STON1-GTF2A1L	MSH6
MDAMB468	1.44	6:128515601-129607600	DUP	1092000	8	LAMA2,PTPRK,RP1-86D1.2,RP1-86D1.3,RP1-86D1.4,RP1-86D1.5,Y_RNA,snoU13	LAMA2
MDAMB468	1.44	11:106581201-106882100	DUP	300900	2	AP001282.1,GUCY1A2	GUCY1A2
MDAMB468	1.44	19:13107301-14130500	DUP	1023200	29	AC005513.1,AC005546.2,AC007787.2,AC008686.1,C19orf53,C19orf57,CACNA1A,CC2D1A,CTB-5E10.3,CTC-239J10.1,CTC-250I14.3,CTC-250I14.6,CTD-3252C9.2,DCAF15,IER2,LYL1,MIR181C,MIR181D,MIR23A,MIR24-2,MIR27A,NACC1,NANOS3,NFIX,PODNL1,RFX1,RN7SL619P,TRMT1,ZSWIM4	LYL1
MDAMB468	1.44	19:15049501-15442500	DUP	393000	14	AC003956.1,AC004257.1,AC004257.3,AC004699.1,BRD4,CASP14,CCDC105,EPHX3,NOTCH3,OR1I1,OR7C2,RNU6-782P,SLC1A6,SYDE1	BRD4,NOTCH3
MDAMB468	1.44	19:41474001-42104300	DUP	630300	25	AC006129.1,AC006129.2,AC006129.4,AC011526.1,ATP5SL,AXL,B3GNT8,B9D2,BCKDHA,C19orf69,CCDC97,CEACAM21,CTC-435M10.10,CTC-435M10.3,CTC-435M10.6,CTD-2195B23.3,CYP2A13,CYP2B6,CYP2S1,EXOSC5,HNRNPUL1,RN7SL34P,RN7SL718P,TGFB1,TMEM91	AXL,CYP2B6,TGFB1
MDAMB468	1.43	1:32143201-33721700	DUP	1578500	51	ADC,AK2,AL031602.1,AL136115.1,BAI2,BSDC1,CCDC28B,COL16A1,DCDC2B,EIF3I,FAM167B,FAM229A,FKSG48,FNDC5,HDAC1,HPCA,IQCC,KHDRBS1,KIAA1522,KPNA6,LCK,MARCKSL1,MIR4254,MIR5585,PTP4A2,RBBP4,RN7SL122P,RNF19B,RP1-117O3.2,RP11-114B7.6,RP11-277A4.4,RP11-84A19.2,RP11-84A19.3,RP11-84A19.4,RP4-534N18.2,RP4-622L5.2,RP4-622L5.7,RP4-811H24.9,S100PBP,SPOCD1,SYNC,TMEM39B,TMEM54,TRIM62,TSSK3,TXLNA,YARS,Y_RNA,ZBTB8A,ZBT…	LCK
MDAMB468	1.43	1:35458801-37009500	DUP	1550700	41	ADPRHL2,AGO1,AGO3,AGO4,C1orf216,CLSPN,COL8A2,CSF3R,EVA1B,KIAA0319L,LSM10,MAP7D1,MRPS15,NCDN,OSCP1,PSMB2,RN7SL131P,RN7SL136P,RN7SL281P,RN7SL503P,RNU4-27P,RNY5P1,RP11-268J15.5,RP11-435D7.3,RP4-665N4.8,RP4-728D4.2,RP4-789D17.5,SFPQ,SH3D21,SNORA62,SNORA63,STK40,TEKT2,TFAP2E,THRAP3,TRAPPC3,Y_RNA,ZMYM1,ZMYM4,ZMYM4-AS1,ZMYM6	CSF3R,PSMB2
MDAMB468	1.43	5:155494901-157952200	DUP	2457300	36	AC008694.3,AC010609.1,AC026407.1,AC106801.1,C5orf52,CLINT1,CTB-109A12.1,CTB-120L21.1,CTB-47B11.3,CTB-4E7.1,CTC-248O19.1,CTC-340I23.2,CTC-436K13.1,CTC-436K13.2,CTC-436K13.3,CTC-436K13.5,CTC-436K13.6,FAM71B,FNDC9,HAVCR1,HAVCR2,ITK,LSM11,MED7,NIPAL4,RNU2-48P,RNU6-260P,RNU6-390P,RNU6-556P,RP11-32D16.1,RP11-542A14.1,RP11-542A14.2,SGCD,SOX30,THG1L,TIMD4	ITK
MDAMB468	1.43	6:114238801-114850000	DUP	611200	8	AL136446.1,HDAC2,HS3ST5,RNA5SP213,RP11-544L8__B.4,RP3-399L15.1,RP3-399L15.2,RP3-399L15.3	HDAC2
MDAMB468	1.43	7:5192801-5771000	DUP	578200	19	AC006483.1,AC092171.2,AC092171.4,AC093376.1,AC093620.5,ACTB,CTB-161C1.1,FSCN1,MIR589,RNF216,RNF216-IT1,RNU6-215P,RP11-1275H24.1,RP11-1275H24.2,RP11-1275H24.3,SLC29A4,TNRC18,WIPI2,snoU13	ACTB
MDAMB468	1.43	13:93191301-93743500	DUP	552200	3	GPC5,GPC5-AS1,LINC00363	GPC5
MDAMB468	1.43	19:15790201-16898500	DUP	1108300	44	AC004510.3,AC004791.2,AP1M1,C19orf44,CALR3,CHERP,CIB3,CTC-429P9.1,CTC-429P9.2,CTC-429P9.3,CTC-429P9.4,CTC-429P9.5,CTD-2013N17.4,CTD-2231E14.4,CTD-2231E14.5,CTD-2231E14.8,CTD-2562J15.4,CTD-2562J15.6,CTD-3222D19.10,CTD-3222D19.11,CTD-3222D19.5,CTD-3222D19.7,CYP4F11,CYP4F12,EPS15L1,FAM32A,HSH2D,KLF2,LINC00661,LINC00905,LLNLR-249E10.1,OR10H1,OR10H2,OR10H3,OR10H4,OR10H5,RAB8A,RN7SL146P,RN7SL844P,SLC35…	TPM4
MDAMB468	1.42	1:26996501-27047200	DUP	50700	2	ARID1A,RP5-968P14.2	ARID1A
MDAMB468	1.42	1:45282601-45947700	DUP	665100	15	AL136380.1,AL359473.1,AL592294.1,EIF2B3,HECTD3,HPDL,MUTYH,PTCH2,RNA5SP47,RNU5E-6P,TESK2,TOE1,UROD,ZSWIM5,snoU13	MUTYH,PTCH2,UROD
MDAMB468	1.42	1:161498401-162558700	DUP	1060300	25	ATF6,C1orf111,C1orf226,FCGR2B,FCGR3A,FCGR3B,FCRLA,FCRLB,MIR4654,MIR556,NOS1AP,RN7SL466P,RNA5SP61,RP11-227F8.2,RP11-25K21.1,RP11-25K21.6,RP11-359K18.3,RP11-474I16.8,RP11-565P22.2,RP11-565P22.6,RP11-5K23.5,SH2D1B,UAP1,UHMK1,Y_RNA	FCGR2B
MDAMB468	1.42	1:162559301-162696500	DUP	137200	3	DDR2,RP11-359K18.4,UAP1	DDR2
MDAMB468	1.42	1:166709801-168440700	DUP	1730900	34	ADCY10,CD247,CREG1,DCAF6,DUSP27,GPA33,GPR161,ILDR2,MAEL,MIR1255B2,MIR557,MPC2,MPZL1,POGK,POU2F1,RCSD1,RNA5SP65,RNU6-1310P,RP1-313L4.3,RP11-102C16.3,RP11-104L21.2,RP11-104L21.3,RP11-277B15.2,RP11-277B15.3,RP11-52A20.2,RP3-455J7.4,RP4-782G3.1,RP5-968D22.1,RP5-968D22.3,SFT2D2,TADA1,TBX19,TIPRL,snoU13	RCSD1
MDAMB468	1.42	3:96341001-96818400	DUP	477400	2	AC117444.1,EPHA6	EPHA6
MDAMB468	1.42	6:72092101-74340600	DUP	2248500	32	AC019205.1,AC019205.2,AL035467.1,AL354933.1,AL445256.1,AL603910.1,DDX43,DPPA5,EEF1A1,KCNQ5,KCNQ5-AS1,KCNQ5-IT1,KHDC1,KHDC1L,KHDC3L,LINC00472,MB21D1,MIR30A,MIR4282,MTO1,Metazoa_SRP,OOEP,OOEP-AS1,RNU4-66P,RNU6-975P,RP1-288M22.2,RP11-398K22.12,RP11-505P4.6,RP11-505P4.7,RP3-331H24.5,SLC17A5,snoU13	MTO1
MDAMB468	1.42	6:74602401-76912700	DUP	2310300	25	AL590684.1,COL12A1,COX7A2,FILIP1,IMPG1,MIR4463,MYO6,RN7SKP163,RNA5SP209,RNU1-34P,RNU6-1016P,RNU6-1338P,RNU6-155P,RNU6-248P,RP1-234P15.4,RP11-415D17.3,RP11-415D17.4,RP11-554D15.1,RP11-554D15.3,RP11-554D15.4,SENP6,TMEM30A,U3,Y_RNA,snoU13	TMEM30A
MDAMB468	1.42	7:50410601-52786500	DUP	2375900	15	AC004920.3,AC018705.5,COBL,DDC,FIGNL1,GRB10,IKZF1,RN7SL292P,RNU6-1091P,RP11-153N17.1,RP4-718N17.2,RP4-724E13.2,SNORA31,SNORA4,snoU13	IKZF1
MDAMB468	1.42	17:67142801-67563900	DUP	421100	6	ABCA10,ABCA5,MAP2K6,RP1-193H18.2,RP1-193H18.3,SNORA40	MAP2K6
MDAMB468	1.42	19:17856801-18939900	DUP	1083100	45	AC005253.2,AC005253.4,AC005387.2,AC005387.3,AC007192.6,AC008397.1,AC068499.10,ARRDC2,B3GNT3,CCDC124,COMP,CRLF1,CRTC1,CTD-3137H5.1,ELL,FCHO1,FKBP8,GDF15,IFI30,IL12RB1,INSL3,JUND,KCNN1,KIAA1683,KLHL26,KXD1,LRRC25,LSM4,MAST3,MIR3188,MIR3189,MPV17L2,PDE4C,PGPEP1,PIK3R2,RAB3A,RN7SL155P,RN7SL513P,RNA5SP468,RPL18A,SLC5A5,SNORA68,SSBP4,TMEM59L,UBA52	ELL,MAST3,PIK3R2
MDAMB468	1.42	19:39164501-39351900	DUP	187400	9	AC008982.2,AC104534.2,AC104534.3,CTB-186G2.4,CTD-2540F13.2,HNRNPL,LGALS7,LGALS7B,RNU6-140P	LGALS7
MDAMB468	1.42	19:45223601-45686700	DUP	463100	25	AC005757.6,AC005757.7,APOC1,APOC2,APOC4,APOE,BCAM,BLOC1S3,CBLC,CLASRP,CTB-129P6.11,CTB-129P6.4,CTB-179K24.3,GEMIN7,MARK4,NKPD1,PPP1R37,PVRL2,RELB,RNU6-611P,SNORA70,TOMM40,TRAPPC6A,ZNF296,snoZ6	CBLC
MDAMB468	1.41	1:50415901-51143200	DUP	727300	12	AGBL4,AL645730.1,AL645730.2,DMRTA2,ELAVL4,FAF1,RNU6-1026P,RP11-567C20.2,RP11-567C20.3,RP5-850O15.3,RP5-850O15.4,Y_RNA	AGBL4,FAF1
MDAMB468	1.41	1:177653601-179329700	DUP	1676100	21	ABL2,ANGPTL1,C1ORF220,C1orf220,FAM20B,LINC00083,MIR4424,RASAL2,RASAL2-AS1,RNA5SP69,RP11-428K3.1,RP11-63B19.1,RP4-593C16.3,RP4-798P15.3,RP5-1098D14.1,SEC16B,SNORA63,SNORA67,SOAT1,TEX35,TOR3A	ABL2
MDAMB468	1.41	1:206541801-206696600	DUP	154800	6	C1orf147,IKBKE,RASSF5,RP11-534L20.5,SRGAP2,SRGAP2-AS1	IKBKE
MDAMB468	1.41	2:15238901-16271500	DUP	1032600	15	AC008271.1,AC008278.2,AC008278.3,AC010145.4,AC113608.1,AC130710.1,AC142119.1,DDX1,MYCN,MYCNOS,MYCNUN,NBAS,RN7SL104P,RNU5E-7P,snoU13	DDX1,MYCN
MDAMB468	1.41	6:51426501-52058600	DUP	632100	8	AL590391.1,IL17A,MIR133B,MIR133BHG,MIR206,PKHD1,RN7SL580P,RP3-335N17.2	PKHD1
MDAMB468	1.41	7:1276801-2030800	DUP	754000	19	AC073094.4,AC074389.1,AC074389.5,AC074389.6,AC074389.7,AC074389.9,AC102953.4,AC102953.6,AC110781.3,ELFN1,INTS1,MAD1L1,MAFK,MIR4655,PSMG3,PSMG3-AS1,RP11-1246C19.1,TMEM184A,UNCX	MAD1L1
MDAMB468	1.41	7:2031701-2590700	DUP	559000	13	AC004840.8,AC004840.9,BRAT1,CHST12,EIF3B,FTSJ2,GRIFIN,LFNG,MAD1L1,MIR4648,NUDT1,SNX8,snoU13	LFNG,MAD1L1
MDAMB468	1.41	16:79068601-80276400	DUP	1207800	16	AC009159.1,MAF,RNA5SP431,RP11-148M9.1,RP11-345M22.1,RP11-345M22.2,RP11-345M22.3,RP11-467I17.1,RP11-525K10.1,RP11-525K10.2,RP11-525K10.3,RP11-556H2.2,RP11-556H2.3,RP11-556H2.4,RP11-679B19.2,WWOX	MAF,WWOX
MDAMB468	1.41	19:12698901-13106100	DUP	407200	37	AC010422.1,AC020934.1,AC092069.1,ASNA1,BEST2,CTC-425F1.2,CTC-425F1.4,CTD-2192J16.24,CTD-2192J16.26,CTD-2265O21.3,CTD-2265O21.7,CTD-2659N19.10,CTD-2659N19.2,CTD-2659N19.4,CTD-2659N19.9,DAND5,DHPS,DNASE2,FARSA,GADD45GIP1,GCDH,HOOK2,JUNB,KLF1,MAST1,MIR5684,MIR5695,PRDX2,RNASEH2A,RTBDN,SNORD41,SYCE2,TNPO2,WDR83,WDR83OS,ZNF490,ZNF791	ASNA1
MDAMB468	1.41	19:16899401-17563700	DUP	664300	35	ABHD8,AC010646.3,BABAM1,BST2,CPAMD8,CTD-2278I10.1,CTD-2278I10.4,CTD-2521M24.10,CTD-2521M24.11,CTD-2521M24.5,CTD-2521M24.6,CTD-2521M24.8,CTD-2521M24.9,CTD-2528A14.1,CTD-2528A14.3,CTD-2528A14.5,CTD-2538G9.5,CTD-2538G9.6,CTD-3032J10.2,CTD-3032J10.3,CTD-3032J10.4,F2RL3,GTPBP3,HAUS8,MRPL34,MVB12A,MYO9B,NR2F6,OCEL1,PLVAP,RN7SL823P,RN7SL835P,SIN3B,TMEM221,USHBP1	CPAMD8
MDAMB468	1.41	19:40387701-41471200	DUP	1083500	44	AC005614.3,AC005614.5,AC007842.1,AC092071.1,AC118344.1,ADCK4,AKT2,BLVRB,C19orf47,C19orf54,CNTD2,CTC-425O23.2,CTC-471F3.6,CTC-490E21.10,CTC-492K19.4,CYP2A6,CYP2A7,EGLN2,FCGBP,HIPK4,ITPKC,LTBP4,MAP3K10,MIA,MIR641,NUMBL,PLD3,PRX,PSMC4,RAB4B,RAB4B-EGLN2,RN7SL758P,RNU6-195P,RNU6-945P,SERTAD1,SERTAD3,SHKBP1,SNRPA,SPTBN4,TTC9B,Y_RNA,ZNF546,ZNF780A,ZNF780B	AKT2,CYP2A6,PRX
MDAMB468	1.41	X:152886101-152953200	DUP	67100	3	DUSP9,PNCK,RN7SL687P	DUSP9
MDAMB468	1.4	1:97360301-97955800	DUP	595500	5	AL592205.1,AL592205.2,DPYD,DPYD-AS1,DPYD-IT1	DPYD
MDAMB468	1.4	1:152210701-152555600	DUP	344900	9	CRCT1,CRNN,FLG,FLG-AS1,FLG2,LCE3D,LCE3E,LCE5A,RP1-91G5.3	FLG
MDAMB468	1.4	1:155779701-156526700	DUP	747000	38	AL355388.1,ARHGEF2,BGLAP,CCT3,GON4L,IQGAP3,KIAA0907,LAMTOR2,LMNA,MEF2D,MEX3A,MIR9-1,PAQR6,PMF1,PMF1-BGLAP,RAB25,RIT1,RNU4-19P,RP11-139I14.2,RP11-284F21.8,RP11-336K24.12,RP11-336K24.5,RP11-98G7.1,RXFP4,SCARNA4,SEMA4A,SLC25A44,SMG5,SNORA26,SNORA42,SSR2,SYT11,TMEM79,TSACC,UBQLN4,VHLL,Y_RNA,snoU13	RAB25,SMG5
MDAMB468	1.4	1:158966201-160376300	DUP	1410100	48	AIM2,AL121987.1,AL359753.1,AL590560.1,APCS,ATP1A4,C1orf204,CADM3,CASQ1,CCDC19,COPA,CRP,CTA-134P22.2,DARC,DCAF8,DUSP23,FCER1A,IFI16,IGSF8,IGSF9,KCNJ10,KCNJ9,LINC01133,NCSTN,NHLH1,OR10J1,OR10J3,OR10J5,PEA15,PEX19,PIGM,RNA5SP60,RNU4-42P,RP11-180D21.3,RP11-190A12.8,RP11-226L15.5,RP11-536C5.2,RP11-536C5.7,RP11-550P17.5,RP11-574F21.2,SLAMF8,SLAMF9,SNORD64,TAGLN2,VANGL2,VSIG8,Y_RNA,hsa-mir-4259	NCSTN
MDAMB468	1.4	1:160955201-161497900	DUP	542700	31	ACA64,ADAMTS4,AL590714.1,AL591806.1,B4GALT3,C1orf192,DEDD,F11R,FCER1G,FCGR2A,HSPA6,KLHDC9,MIR5187,NDUFS2,NIT1,NR1I3,PCP4L1,PFDN2,PPOX,PVRL4,RNU6-481P,RP11-122G18.5,RP11-122G18.8,RP11-25K21.6,RP11-297K8.2,RP11-544M22.8,SDHC,TOMM40L,UFC1,USF1,USP21	B4GALT3,SDHC
MDAMB468	1.4	1:182479801-184768800	DUP	2289000	36	AL137800.1,AL450304.1,AL513344.1,APOBEC4,ARPC5,C1orf21,COLGALT2,DHX9,EDEM3,FAM129A,GS1-115G20.1,LAMC1,LAMC2,NCF2,NMNAT2,NPL,RGL1,RGS16,RGS8,RN7SL654P,RNA5SP71,RNASEL,RNU6-41P,RP1-127C7.6,RP11-181K3.4,RP11-317P15.3,RP11-317P15.4,RP11-317P15.5,RP11-382D12.1,RP11-382D12.2,RP11-444D13.1,SHCBP1L,SMG7-AS1,SNORD112,TSEN15,Y_RNA	RGL1
MDAMB468	1.4	6:90813001-91673200	DUP	860200	5	AL391559.1,BACH2,MAP3K7,MIR4464,RP1-45N11.1	MAP3K7
MDAMB468	1.4	6:108032501-109163700	DUP	1131200	19	FOXO3,LACE1,LINC00222,NR2E1,OSTM1,OSTM1-AS1,RNA5SP212,RNU6-1144P,RNU6-437P,RNU6-770P,RP1-111B22.3,RP1-128O3.4,RP1-191J18.66,SCML4,SEC63,SNORA73,SNX3,Y_RNA,snoU13	FOXO3
MDAMB468	1.4	6:126876201-128067900	DUP	1191700	8	C6orf58,ECHDC1,RNA5SP217,RNF146,RNU6-200P,RSPO3,SOGA3,THEMIS	RSPO3
MDAMB468	1.4	7:5967601-6129900	DUP	162300	11	AC004895.1,AC004895.4,AIMP2,ANKRD61,EIF2AK1,PMS2,RN7SL851P,RNU6-218P,RSPH10B,SNORA42,Y_RNA	EIF2AK1,PMS2
MDAMB468	1.4	19:11426301-11524400	DUP	98100	11	CCDC159,CTC-510F12.4,CTC-510F12.6,CTD-2342J14.6,DKFZP761J1410,EPOR,RAB3D,SWSAP1,TMEM205,TSPAN16,Y_RNA	EPOR
MDAMB468	1.39	1:162698101-163028900	DUP	330800	4	C1orf110,DDR2,HSD17B7,RN7SL861P	DDR2
MDAMB468	1.39	1:201871201-202141200	DUP	270000	11	ARL8A,ELF3,GPR37L1,LMOD1,PTPN7,RNPEP,RP11-465N4.4,RP11-465N4.5,RP11-510N19.5,SNORA70,TIMM17A	ELF3
MDAMB468	1.39	1:203889901-205922700	DUP	2032800	52	AC096645.1,AC119673.1,AL161793.1,AL583832.1,CDK18,CNTN2,DSTYK,ELK4,ETNK2,GOLT1A,KISS1,KLHDC8A,LEMD1,LEMD1-AS1,LINC00303,LRRN2,MDM4,MFSD4,MIR135B,NFASC,NUAK2,NUCKS1,PIK3C2B,PLEKHA6,PM20D1,PPP1R15B,RAB7L1,RBBP5,REN,RNA5SP74,RNA5SP75,RNU2-19P,RNU6-418P,RP11-203F10.5,RP11-23I7.1,RP11-383G10.5,RP11-430C7.4,RP11-430C7.5,RP11-576D8.4,RP11-739N20.2,RP11-74C13.3,RP11-74C13.4,RP4-681L3.2,SCARNA20,SLC26A9,S…	MDM4,PIK3C2B,SLC45A3
MDAMB468	1.39	5:160597601-161957700	DUP	1360100	8	AC022120.1,GABRA1,GABRA6,GABRB2,GABRG2,RNU6-164P,RP11-348M17.2,RP11-96G10.1	GABRA6
MDAMB468	1.39	6:90002601-90566600	DUP	564000	11	ANKRD6,CASP8AP2,LYRM2,MDN1,RN7SL11P,RP1-122O8.7,RP11-16C18.3,RRAGD,UBE2J1,Y_RNA,snoU13	MDN1
MDAMB468	1.39	6:132014301-134725200	DUP	2710900	40	CTAGE9,CTGF,EYA4,LINC00326,LINC01013,MIR548AJ1,MIR548H5,MOXD1,OR2A4,RN7SKP245,RN7SL408P,RNA5SP218,RP1-283K11.2,RP1-283K11.3,RP1-55C23.7,RP11-69I8.2,RP11-69I8.3,RP11-704J17.5,RP3-323P13.2,RP3-523C21.2,RP4-662A9.2,RPS12,SGK1,SLC18B1,SLC2A12,SNORA33,SNORD100,SNORD101,STX7,TAAR1,TAAR2,TAAR5,TAAR6,TAAR8,TBPL1,TCF21,VNN1,VNN3,Y_RNA,snoU13	SGK1
MDAMB468	1.39	6:135009301-136255700	DUP	1246400	17	AHI1,AL360178.1,ALDH8A1,CTA-212D2.2,HBS1L,LINC00271,MIR548A2,MYB,MYB-AS1,PDE7B,RP1-287H17.1,RP1-32B1.4,RP1-38C16.2,RP11-349J5.2,RP11-394G3.2,RP3-388E23.2,Y_RNA	MYB
MDAMB468	1.39	16:86284601-87524600	DUP	1240000	31	C16orf95,CTD-2015G9.1,CTD-2015G9.2,FBXO31,FENDRR,FOXC2,FOXF1,FOXL1,LINC00917,LINC01081,MAP1LC3B,MTHFSD,RP11-134D3.1,RP11-134D3.2,RP11-158I3.3,RP11-178L8.3,RP11-178L8.4,RP11-178L8.5,RP11-178L8.7,RP11-178L8.8,RP11-178L8.9,RP11-463O9.5,RP11-463O9.6,RP11-463O9.9,RP11-514D23.1,RP11-58A18.1,RP11-899L11.1,RP11-899L11.3,Y_RNA,ZCCHC14,snoU13	FBXO31
MDAMB468	1.39	19:30303001-30995900	DUP	692900	5	AC005597.1,CCNE1,CTC-448F2.4,URI1,ZNF536	CCNE1,ZNF536
MDAMB468	1.39	19:57683701-59118100	DUP	1434400	94	A1BG,A1BG-AS1,AC003002.4,AC003002.6,AC003005.2,AC003006.1,AC003006.7,AC003682.16,AC004017.1,AC004076.7,AC004076.9,AC012313.1,AC016629.3,AC016629.8,AC020915.1,AURKC,C19orf18,CHMP2A,CTC-444N24.11,CTC-444N24.13,CTC-444N24.6,CTC-444N24.8,CTD-2368P22.1,CTD-2583A14.10,CTD-2583A14.8,CTD-2619J13.13,CTD-2619J13.14,CTD-2619J13.16,CTD-2619J13.17,CTD-2619J13.19,CTD-2619J13.23,CTD-2619J13.3,CTD-2619J13.8,CTD-…	TRIM28,ZNF132
MDAMB468	1.38	1:48949801-49450900	DUP	501100	2	AGBL4,BEND5	AGBL4
MDAMB468	1.38	5:165586601-166777400	DUP	1190800	7	CTB-105L4.2,CTB-180C19.1,CTB-7E3.1,CTC-264O10.1,CTC-264O10.2,CTC-286N12.1,TENM2	TENM2
MDAMB468	1.38	7:3075301-4080700	DUP	1005400	8	AC011284.3,AC024028.1,AC069286.1,AC073316.1,AC073316.2,AC091801.1,CARD11,SDK1	CARD11
MDAMB468	1.38	16:78082401-78354800	DUP	272400	3	RP11-190D6.2,RP11-281J9.2,WWOX	WWOX
MDAMB468	1.38	16:88601601-89646200	DUP	1044600	49	AC092384.1,AC137932.1,AC137932.5,AC137932.6,ACSF3,ANKRD11,APRT,CBFA2T3,CDH15,CDT1,CPNE7,CTD-2555A7.1,CTD-2555A7.2,CTD-2555A7.3,CTU2,CYBA,GALNS,LINC00304,MIR4722,PABPN1L,PIEZO1,RNF166,RNU6-430P,RNU7-117P,RP1-168P16.1,RP1-168P16.2,RP11-104N10.1,RP11-46C24.3,RP11-46C24.5,RP11-46C24.6,RP11-46C24.7,RP11-830F9.5,RP11-830F9.6,RP11-830F9.7,RP5-1142A6.2,RP5-1142A6.5,RP5-1142A6.7,RP5-1142A6.8,RP5-1142A6.9,…	CBFA2T3
MDAMB468	1.37	1:75848101-76350700	DUP	502600	10	ACADM,AL445464.1,MSH4,RABGGTB,RNU6-503P,RP4-682C21.5,SLC44A5,SNORD45A,SNORD45B,SNORD45C	SLC44A5
MDAMB468	1.37	1:171618201-171977900	DUP	359700	7	DNM3,DNM3-IT1,METTL13,MYOC,SCARNA20,VAMP4,Y_RNA	MYOC
MDAMB468	1.37	1:184816801-185856700	DUP	1039900	13	FAM129A,GS1-120K12.4,GS1-204I12.1,GS1-204I12.4,GS1-279B7.1,GS1-279B7.2,HMCN1,RNA5SP72,RNF2,RNU7-183P,SWT1,TRMT1L,Y_RNA	HMCN1
MDAMB468	1.37	7:13829801-14606700	DUP	776900	4	AC005019.3,DGKB,ETV1,Y_RNA	ETV1
MDAMB468	1.37	11:98482501-100997900	DUP	2515400	13	AC015600.1,AP003558.1,ARHGAP42,CNTN5,CTD-2383M3.1,PGR,RN7SKP115,RN7SKP53,RN7SL222P,RP11-115E19.1,RP11-99C10.1,TMEM133,snoU13	PGR
MDAMB468	1.36	1:146441801-147424900	DUP	983100	19	ACP6,BCL9,CHD1L,GJA5,GJA8,GPR89B,LINC00624,NBPF12,PRKAB2,RN7SL261P,RNVU1-8,RP11-337C18.10,RP11-337C18.8,RP11-337C18.9,RP11-433J22.2,RP11-433J22.3,RP11-533N14.3,RP4-704D21.2,Y_RNA	BCL9,CHD1L
MDAMB468	1.36	1:171066001-171617600	DUP	551600	14	FMO1,FMO2,FMO3,FMO4,MIR1295A,MYOC,PRRC2C,RN7SL425P,RNU6-290P,RNU6-773P,RP1-127D3.4,RP1-45C12.1,Y_RNA,snoU13	MYOC
MDAMB468	1.36	19:31000601-31966600	DUP	966000	12	AC007796.1,AC008992.1,AC011478.1,AC020952.1,CTC-400I9.1,CTC-400I9.2,CTC-400I9.3,CTC-439O9.3,CTC-565M22.1,CTD-2050I18.2,TSHZ3,ZNF536	TSHZ3,ZNF536
MDAMB468	1.35	1:49529601-50413600	DUP	884000	5	AGBL4,AGBL4-IT1,RP11-141A19.1,RP11-141A19.2,snoU13	AGBL4
MDAMB468	1.35	1:75276601-75745800	DUP	469200	7	LHX8,RNU6-622P,RP11-510C10.2,RP11-510C10.3,RP11-510C10.4,RP11-93N20.1,SLC44A5	SLC44A5
MDAMB468	1.35	1:75746201-75843300	DUP	97100	1	SLC44A5	SLC44A5
MDAMB468	1.35	1:150717401-151431100	DUP	713700	37	ANXA9,ARNT,BNIPL,C1orf56,CDC42SE1,CTSK,CTSS,FAM63A,GABPB2,LYSMD1,MLLT11,PI4KB,PIP5K1A,POGZ,PRUNE,PSMB4,PSMD4,RFX5,RN7SL444P,RNU6-1309P,RNU6-884P,RNY4P25,RP11-126K1.2,RP11-126K1.6,RP11-126K1.8,RP11-126K1.9,RP11-316M1.12,RP11-316M1.3,RP11-68I18.10,SCNM1,SELENBP1,SEMA6C,SETDB1,TMOD4,TNFAIP8L2,Y_RNA,ZNF687	ARNT
MDAMB468	1.35	1:154372301-155779200	DUP	1406900	61	ADAM15,ADAR,AL606500.1,AL713999.1,ASH1L,ASH1L-AS1,ASH1L-IT1,CHRNB2,CKS1B,CLK2,DAP3,DPM3,EFNA1,EFNA3,EFNA4,FAM189B,FDPS,FLAD1,GBA,GON4L,HCN3,IL6R,KCNN3,KRTCAP2,MIR4258,MIR555,MIR92B,MSTO1,MTX1,MUC1,PBXIP1,PKLR,PMVK,PYGO2,RNU6-106P,RNU6-1297P,RNU7-150P,RP11-201K10.3,RP11-243J18.2,RP11-263K19.4,RP11-263K19.6,RP11-29H23.4,RP11-307C12.11,RP11-307C12.12,RP11-307C12.13,RP11-350G8.5,RP11-350G8.9,RP11-61L…	CKS1B,GBA,IL6R,MUC1,SHC1
MDAMB468	1.35	1:157006101-158629400	DUP	1623300	32	ARHGEF11,CD1A,CD1B,CD1C,CD1D,CD1E,CD5L,ETV3,ETV3L,FCRL1,FCRL3,FCRL4,FCRL5,KIRREL,KIRREL-IT1,OR10K1,OR10K2,OR10R2,OR10T2,OR10X1,OR10Z1,OR6P1,OR6Y1,RP11-144L1.4,RP11-367J7.3,RP11-404O13.1,RP11-404O13.5,RP11-71G12.1,RP11-85G21.1,RP11-85G21.2,RP11-85G21.3,SPTA1	CD1D,FCRL4,SPTA1
MDAMB468	1.35	1:169324601-171065000	DUP	1740400	30	AL354732.1,BLZF1,BX284613.1,C1orf112,CCDC181,FMO3,GORAB,KIFAP3,LINC01142,METTL11B,METTL18,MIR3119-1,MROH9,NME7,PRRX1,RN7SL269P,RN7SL333P,RP1-117P20.3,RP1-206D15.3,RP1-79C4.1,RP1-79C4.4,RP11-297H3.3,RP11-332H17.1,RP11-545I10.2,RP11-576I22.2,SCYL3,SELE,SELL,SELP,SLC19A2	PRRX1
MDAMB468	1.35	1:193131501-193532800	DUP	401300	3	B3GALT2,CDC73,LINC01031	CDC73
MDAMB468	1.35	1:210892101-212103000	DUP	1210900	21	AC092017.1,AL356310.1,KCNH1,KCNH1-IT1,LINC00467,LPGAT1,NEK2,RCOR3,RD3,RN7SL344P,RP11-122M14.1,RP11-122M14.3,RP11-318L16.6,RP11-354K1.2,RP11-359E8.3,RP11-359E8.5,RP11-543B16.3,RP11-552D8.1,SLC30A1,TRAF5,Y_RNA	TRAF5
MDAMB468	1.35	1:215404101-216185300	DUP	781200	4	KCTD3,RP5-1111A8.3,SNORD116,USH2A	USH2A
MDAMB468	1.35	1:241107901-242556200	DUP	1448300	15	CHML,EXO1,FH,KMO,MAP1LC3C,MIR3123,OPN3,PLD5,RGS7,RN7SKP12,RNA5SP81,RNU6-1139P,RP11-527D7.1,RP11-561I11.3,RP11-561I11.4	FH
MDAMB468	1.35	7:4631401-4818300	DUP	186900	3	AP5Z1,FOXK1,snoU13	FOXK1
MDAMB468	1.34	1:2987401-3435800	DUP	448400	6	ARHGEF16,MEGF6,PRDM16,RP1-163G9.2,RP11-168F9.2,RP11-22L13.1	PRDM16
MDAMB468	1.34	1:13781301-14121700	DUP	340400	8	AL359771.1,CTA-520D8.2,LRRC38,PDPN,PRDM2,RNA5SP41,RP4-597A16.2,SCARNA11	PRDM2
MDAMB468	1.34	1:149646201-150405800	DUP	759600	40	AL358813.2,ANP32E,APH1A,BOLA1,C1orf51,C1orf54,CA14,FAM231D,FCGR1A,HIST2H2AA3,HIST2H2AA4,HIST2H2AB,HIST2H2AC,HIST2H2BE,HIST2H2BF,HIST2H3A,HIST2H3C,HIST2H3D,HIST2H4B,MRPS21,MTMR11,OTUD7B,PLEKHO1,PRPF3,RN7SL480P,RNU1-68P,RNU2-17P,RP11-196G18.21,RP11-196G18.22,RP11-196G18.23,RP11-196G18.24,RP11-196G18.3,RP11-353N4.4,RP11-353N4.5,RP4-790G17.7,RPRD2,SF3B4,SV2A,VPS45,snoU13	APH1A
MDAMB468	1.34	1:150406401-150700600	DUP	294200	17	ADAMTSL4,ADAMTSL4-AS1,AL356356.1,ECM1,ENSA,GOLPH3L,HORMAD1,LINC00568,MCL1,MIR4257,RN7SL473P,RN7SL600P,RNU6-1042P,RP11-54A4.2,RPRD2,SNORA40,TARS2	MCL1
MDAMB468	1.34	1:185924201-186611000	DUP	686800	11	AL596220.1,C1orf27,GS1-174L6.4,GS1-304P7.3,HMCN1,OCLM,PDC,PRG4,RNU6-1240P,RP11-295K2.3,TPR	HMCN1,PRG4
MDAMB468	1.34	1:226152501-228024100	DUP	1871600	29	ACBD3,ADCK3,AL592310.1,C1orf95,CDC42BPA,CTD-2090I13.1,H3F3A,ITPKB,ITPKB-AS1,ITPKB-IT1,JMJD4,LIN9,MIXL1,PARP1,PRSS38,PSEN2,RN7SKP165,RNA5SP77,RP11-1B20.1,RP11-275I14.4,RP11-275O4.3,RP11-396C23.2,RP11-396C23.4,RP5-1087E8.3,SDE2,SNAP47,SNAP47-AS1,ZNF678,snoU13	H3F3A,PARP1
MDAMB468	1.34	6:95951301-98833900	DUP	2882600	21	FHL5,FUT9,GPR63,KLHL32,MANEA,MANEA-AS1,MIR2113,MMS22L,NDUFAF4,RN7SL509P,RN7SL797P,RNU4-70P,RP1-104O17.1,RP1-104O17.2,RP1-104O17.3,RP11-111D3.2,RP11-436D23.1,RP3-417O22.3,RP3-418C23.2,UFL1,UFL1-AS1	MMS22L
MDAMB468	1.34	6:138758901-141002000	DUP	2243100	20	ABRACL,AL356137.1,CCDC28A,CITED2,ECT2L,HECA,MIR3668,NHSL1,REPS1,RNA5SP220,RNU6-427P,RP1-225E12.2,RP1-225E12.3,RP11-12A2.3,RP11-390P2.4,RP11-445F6.2,RP3-332B22.1,RP5-899B16.1,RP5-899B16.2,TXLNB	ECT2L
MDAMB468	1.33	1:163029501-165789400	DUP	2759900	31	AL390119.1,ALDH9A1,LMX1A,LRRC52,MGST3,NUF2,PBX1,RGS4,RGS5,RNA5SP62,RNA5SP63,RNU5F-6P,RNU6-171P,RNU6-755P,RP11-267N12.1,RP11-267N12.3,RP11-280O1.2,RP11-306I1.2,RP11-38C18.2,RP11-38C18.3,RP11-466F5.10,RP11-466F5.8,RP11-477H21.2,RP11-506O24.1,RP11-506O24.2,RP11-77M5.1,RXRG,SNORD112,TMCO1,U3,Y_RNA	PBX1,RXRG
MDAMB468	1.33	1:174996501-177118100	DUP	2121600	15	ASTN1,KIAA0040,MIR488,PAPPA2,RNU2-12P,RP11-195C7.1,RP11-222A5.1,RP11-318C24.2,RP11-492I21.1,RP3-518E13.2,RP5-1114G22.2,SCARNA3,TNN,TNR,TNR-IT1	PAPPA2
MDAMB468	1.33	1:185861901-185917700	DUP	55800	1	HMCN1	HMCN1
MDAMB468	1.33	1:192861901-193130700	DUP	268800	8	CDC73,GLRX2,LINC01032,MIR1278,RP11-101E13.5,TROVE2,UCHL5,snoU109	CDC73
MDAMB468	1.33	1:243783801-244784100	DUP	1000300	14	AC099757.1,ADSS,AKT3,AKT3-IT1,AL590483.1,C1orf100,C1orf101,RN7SL148P,RP11-278H7.1,RP11-278H7.3,RP11-278H7.4,RP11-370K11.1,RP11-518L10.5,ZBTB18	AKT3,ZBTB18
MDAMB468	1.33	1:246235101-246683000	DUP	447900	6	RNU6-1283P,RP11-36N20.1,RP11-690C23.2,SMYD3,SMYD3-IT1,Y_RNA	SMYD3
MDAMB468	1.33	6:63492701-65346600	DUP	1853900	9	AL590558.1,EYS,FKBP1C,LGSN,PHF3,PTP4A1,RP11-349P19.1,RP11-59D5__B.2,RP5-1148A21.3	EYS,PHF3,PTP4A1
MDAMB468	1.33	16:89646701-90180600	DUP	533900	23	C16orf3,CDK10,CENPBD1,CHMP1A,CPNE7,DBNDD1,DEF8,DPEP1,FAM157C,FANCA,GAS8,PRDM7,RP11-356C4.3,RP11-356C4.5,RP11-368I7.4,RP11-566K11.4,RP11-566K11.5,SPATA2L,SPATA33,SPIRE2,TUBB3,VPS9D1,VPS9D1-AS1	FANCA,TUBB3
MDAMB468	1.32	1:219770501-223109600	DUP	3339100	49	AC092765.1,AC096643.1,AC096644.1,AIDA,BPNT1,BROX,C1orf115,DISP1,DUSP10,EPRS,FAM177B,HHIPL2,HLA-AS1,HLX,IARS2,MARC1,MARK1,MIA3,MIR194-1,MIR215,RAB3GAP2,RN7SL276P,RN7SL464P,RNA5SP76,RNU6-403P,RNU6-791P,RNU6ATAC35P,RP11-103C3.1,RP11-191N8.2,RP11-295M18.2,RP11-295M18.6,RP11-302I18.3,RP11-322F10.2,RP11-358H9.1,RP11-378J18.3,RP11-378J18.8,RP11-400N13.1,RP11-400N13.2,RP11-400N13.3,RP11-410C4.4,RP11-410C…	MARK1
MDAMB468	1.32	1:236202501-237239800	DUP	1037300	16	ACTN2,EDARADD,ERO1LB,GPR137B,HEATR1,LGALS8,LGALS8-AS1,MT1HL1,MTR,NID1,RNU2-70P,RP11-385F5.4,RP11-385F5.5,RYR2,Y_RNA,snoU13	RYR2
MDAMB468	1.32	19:55720301-56487900	DUP	767600	52	AC010327.1,AC010327.2,AC010525.2,AC010525.4,AC010525.6,AC010525.7,AC020922.1,BRSK1,CCDC106,COX6B2,CTD-2105E13.13,CTD-2105E13.14,CTD-2105E13.15,CTD-2537I9.12,CTD-2537I9.13,CTD-2537I9.16,CTD-2537I9.5,CTD-2587H24.10,CTD-2611O12.7,CTD-2611O12.8,EPN1,FIZ1,HSPBP1,IL11,ISOC2,NAT14,NLRP11,NLRP13,NLRP4,NLRP8,NLRP9,PTPRH,RFPL4A,RFPL4AL1,RN7SKP109,RPL28,SBK2,SBK3,SHISA7,SSC5D,TMEM150B,TMEM190,TMEM238,U2AF2,…	BRSK1,U2AF2
MDAMB468	1.31	1:72256801-72364400	DUP	107600	2	NEGR1,NEGR1-IT1	NEGR1
MDAMB468	1.31	1:153952701-154371500	DUP	418800	21	AL590431.1,AQP10,ATP8B2,C1orf189,C1orf43,HAX1,MIR190B,MIR5698,NUP210L,RAB13,RN7SL431P,RNU6-121P,RNU6-179P,RNU6-239P,RNU7-57P,RPS27,SNORA58,SNORD59,TPM3,U3,UBAP2L	RPS27,TPM3
MDAMB468	1.31	16:78384901-79065600	DUP	680700	6	PIH1,RP11-264L1.3,RP11-264L1.4,RP11-319G9.3,RP11-319G9.5,WWOX	WWOX
MDAMB468	1.3	1:237616001-238548900	DUP	932900	8	MIR4428,MTRNR2L11,RNU6-725P,RP11-136B18.2,RP11-193H5.1,RYR2,SNORA25,ZP4	RYR2
MDAMB468	1.28	1:243129201-243782700	DUP	653500	12	AC092782.1,AKT3,CEP170,MIR4677,RNU6-747P,RP11-261C10.1,RP11-261C10.2,RP11-261C10.3,RP11-261C10.4,RP11-261C10.5,RP11-269F20.1,SDCCAG8	AKT3
MDAMB468	1.27	1:72521701-72766300	DUP	244600	1	NEGR1	NEGR1
MDAMB468	1.26	6:65774501-65987900	DUP	213400	1	EYS	EYS
MDAMB468	1.06	3:96819754-97120824	DEL	301070	1	EPHA6	EPHA6
MDAMB468	0.96	1:49619276-49620068	DEL	792	2	AGBL4,RP11-141A19.1	AGBL4
MDAMB468	0.77	3:10050597-11952730	DEL	1902133	31	AC018495.3,AC022007.5,AC090841.1,AC090939.1,ATG7,ATP2B2,ATP2B2-IT1,ATP2B2-IT2,BRK1,FANCD2,FANCD2OS,GHRL,GHRLOS,HRH1,IRAK2,LINC00606,LINC00852,MIR378B,MIR885,RNU6-670P,RNU6-814P,RP11-169K17.3,RP11-169K17.4,SEC13,SLC6A1,SLC6A1-AS1,SLC6A11,TATDN2,VGLL4,VHL,snoU13	FANCD2,VHL
MDAMB468	0.77	3:43112001-43609800	DEL	497800	9	AC104434.1,ANO10,POMGNT2,RN7SL517P,RP11-136C24.2,RP11-188P20.3,SNRK,SNRK-AS1,Y_RNA	SNRK
MDAMB468	0.77	12:64759201-66451400	DEL	1692200	33	AC025262.1,AC090673.1,AC090673.2,C12orf56,GNS,HMGA2,LEMD3,MIR548C,MSRB3,RNU6-166P,RNU6ATAC42P,RP11-168J19.2,RP11-221N13.2,RP11-221N13.3,RP11-221N13.4,RP11-230G5.2,RP11-305O6.3,RP11-338E21.1,RP11-338E21.2,RP11-338E21.3,RP11-366L20.2,RP11-366L20.3,RP11-366L20.4,RP11-439H13.2,RP11-629N8.3,RP11-766N7.3,RP11-766N7.4,SNORD83,TBC1D30,TBK1,WIF1,XPOT,snoU13	HMGA2
MDAMB468	0.77	15:33069301-39744800	DEL	6675500	67	AC025678.1,AC114546.1,ACTC1,AQR,AVEN,C15orf41,C15orf53,C15orf54,CHRM5,CTD-2125J1.1,DPH6,DPH6-AS1,EMC4,EMC7,FAM98B,FMN1,GJD2,GOLGA8B,KATNBL1,LPCAT4,MEIS2,MIR1233-1,MIR1233-2,MIR3942,MIR4510,NOP10,NUTM1,PGBD4,RASGRP1,RP11-1008C21.1,RP11-1008C21.2,RP11-102L12.2,RP11-1084A12.2,RP11-122D10.1,RP11-128A17.1,RP11-16L14.2,RP11-184D12.1,RP11-265N7.1,RP11-265N7.2,RP11-275I4.1,RP11-275I4.2,RP11-323I15.5,RP11…	NUTM1,SPRED1
MDAMB468	0.76	4:25580901-26924600	DEL	1343700	14	AC093807.1,CCKAR,RBPJ,RNU7-126P,RP11-293A21.1,RP11-302F12.10,RP11-302F12.3,RP13-494C23.1,SEL1L3,SLC34A2,SMIM20,SNORD74,STIM2,TBC1D19	SLC34A2
MDAMB468	0.76	6:155348301-155431100	DEL	82800	1	TIAM2	TIAM2
MDAMB468	0.76	9:20135401-21537100	DEL	1401700	33	AL163193.1,AL512635.1,FOCAD,IFNA1,IFNA10,IFNA13,IFNA14,IFNA16,IFNA17,IFNA2,IFNA21,IFNA4,IFNA5,IFNA6,IFNA7,IFNA8,IFNB1,IFNE,IFNW1,KLHL9,MIR31,MIR31HG,MIR4473,MIR4474,MIR491,MLLT3,PTPLAD2,RNU4-26P,RP11-354P17.15,RP11-4E23.2,SNORA30,SNORD39,Y_RNA	MLLT3
MDAMB468	0.76	10:100305701-100542600	DEL	236900	1	HPSE2	HPSE2
MDAMB468	0.76	10:100547801-101597500	DEL	1049700	15	ABCC2,CNNM1,COX15,CUTC,ENTPD7,GOT1,HPSE2,NKX2-3,RP11-129J12.1,RP11-129J12.2,RP11-441O15.3,RP11-483F11.7,RP11-85A1.3,SLC25A28,snoU13	ABCC2,HPSE2
MDAMB468	0.76	10:122937301-124360500	DEL	1423200	16	ARMS2,ATE1,ATE1-AS1,BTBD16,DMBT1,FGFR2,HTRA1,LINC01153,MIR3941,NSMCE4A,PLEKHA1,RN7SKP167,RNU6-728P,RP11-62L18.3,RP11-78A18.2,Y_RNA	FGFR2
MDAMB468	0.76	11:90979061-95694691	DEL	4715630	58	AMOTL1,ANKRD49,AP000765.1,AP004242.1,C11orf54,CCDC67,CEP57,CWC15,ENDOD1,FAM76B,FAT3,FOLR4,FUT4,GPR83,HEPHL1,KDM4D,KDM4E,KIAA1731,LINC01171,MED17,MIR1304,MIR548L,MRE11A,MTMR2,MTNR1B,PANX1,RN7SL195P,RN7SL223P,RNA5SP345,RP11-201M22.1,RP11-203F8.1,RP11-338H14.1,RP11-644L4.1,RP11-675M1.2,RP11-676F20.1,RP11-680H20.2,RP11-685N10.1,RP11-712B9.2,RP11-755E23.3,RP11-856F16.2,RP11-867G2.5,RP11-867G2.6,RP11-8…	AMOTL1,CEP57,FAT3,MRE11A
MDAMB468	0.76	12:93793701-94198700	DEL	405000	9	CRADD,MRPL42,NUDT4,RN7SL737P,RP11-887P2.5,SOCS2,SOCS2-AS1,UBE2N,Y_RNA	SOCS2
MDAMB468	0.76	14:65827901-67660600	DEL	1832700	11	AL391261.1,CTD-2014B16.3,FAM71D,FUT8,GPHN,LINC00238,MIR625,RP11-72M17.1,RP11-783L4.1,RP11-862P13.1,Y_RNA	GPHN
MDAMB468	0.76	14:76409401-76800000	DEL	390600	5	ESRRB,RP11-270M14.5,RP11-361H10.3,RP11-516J2.1,TTLL5	TTLL5
MDAMB468	0.76	15:78481301-80298600	DEL	1817300	39	AC027228.1,AC027811.1,AC069082.1,ACSBG1,ADAMTS7,ANKRD34C,BCL2A1,C15ORF37,C15orf37,CHRNA3,CHRNA5,CHRNB4,CRABP1,CTSH,DNAJA4,HYKK,IREB2,KIAA1024,MIR184,MORF4L1,PSMA4,RASGRF1,RNU6-415P,RNU6-667P,RP11-16K12.1,RP11-17L5.4,RP11-335K5.2,RP11-358L4.1,RP11-38G5.2,RP11-38G5.4,RP11-650L12.1,RP11-650L12.2,RP11-762H8.1,RP11-762H8.3,RP11-762H8.4,ST20,ST20-MTHFS,TMED3,WDR61	BCL2A1
MDAMB468	0.76	17:63496501-66069700	DEL	2573200	39	AC005544.1,AC006534.1,AC006534.2,AC006947.1,APOH,AXIN2,BPTF,C17orf58,CACNG1,CACNG4,CACNG5,CEP112,CTD-2653B5.1,HELZ,KPNA2,MIR548AA2,MIR634,NOL11,PITPNC1,PSMD12,RN7SL622P,RN7SL735P,RN7SL756P,RNA5SP444,RNA5SP445,RNA5SP446,RNA5SP447,RNU6-928P,RP11-349A8.3,RP11-401F2.3,RP11-401F2.4,RP11-4F22.2,RP11-74H8.1,RP11-855A2.3,RP11-855A2.5,SNORA38B,SNORA8,Y_RNA,snoU13	AXIN2,BPTF
MDAMB468	0.76	18:18723201-19974800	DEL	1251600	33	ABHD3,AC091038.1,AC091043.1,ESCO1,GATA6,GATA6-AS1,MIB1,MIR1-2,MIR320C1,RN7SL233P,RNA5SP451,RNU6-1038P,RNU6-702P,RNU6ATAC20P,RP11-13N13.2,RP11-13N13.5,RP11-13N13.6,RP11-268I9.3,RP11-296E23.1,RP11-296E23.2,RP11-535A5.1,RP11-595B24.1,RP11-595B24.2,RP11-627G18.1,RP11-627G18.2,RP11-627G18.4,RP11-699A5.2,SNORA73,SNORA81,SNORD23,SNRPD1,Y_RNA,snoU13	GATA6,MIB1
MDAMB468	0.75	3:46829901-49643800	DEL	2813900	84	AC026318.1,AC099778.1,AC104448.1,AC109583.1,ARIH2,ARIH2OS,ATRIP,BSN,BSN-AS2,C3orf84,CAMP,CCDC12,CCDC36,CCDC51,CCDC71,CDC25A,CELSR3,COL7A1,CSPG5,DAG1,ELP6,FBXW12,GPX1,IP6K2,KIF9,KIF9-AS1,KLHDC8B,MAP4,MIR1226,MIR191,MIR2115,MIR425,MIR4271,MIR4443,MIR4793,MIR711,MYL3,NBEAL2,NCKIPSD,NDUFAF3,NICN1,NICN1-AS1,NME6,P4HTM,PFKFB4,PLXNB1,PRKAR2A,PRKAR2A-AS1,PRSS42,PRSS50,PTH1R,QRICH1,RHOA,RHOA-IT1,RN7SL182P…	CELSR3,COL7A1,P4HTM,RHOA
MDAMB468	0.75	3:182955801-184221000	DEL	1265200	39	ABCC5,ABCC5-AS1,ABCF3,AC131160.1,AP2M1,B3GNT5,CAMK2N2,CLCN2,DVL3,ECE2,EIF4G1,FAM131A,HTR3C,HTR3D,HTR3E,HTR3E-AS1,KLHL24,KLHL6,KLHL6-AS1,MAP6D1,MCF2L2,MIR1224,MIR4448,PARL,POLR2H,PSMD2,RNA5SP151,RP11-433C9.2,RP11-778D9.12,RP11-778D9.13,SNORA4,SNORA63,SNORA81,SNORD66,THPO,VWA5B2,YEATS2,YEATS2-AS1,Y_RNA	KLHL6,PSMD2
MDAMB468	0.75	3:185512001-187132000	DEL	1620000	36	ADIPOQ,ADIPOQ-AS1,AHSG,CRYGS,DGKG,DNAJB11,EIF4A2,ETV5,ETV5-AS1,FETUB,HRG,IGF2BP2,KNG1,MASP1,RFC4,RN7SL637P,RNU6-1105P,RP11-134F2.2,RP11-208N14.4,RP11-48F14.1,RP11-48F14.2,RP11-573D15.2,RP11-573D15.3,RP11-573D15.8,RP11-573D15.9,RP11-78H24.1,RPL39L,RTP1,RTP4,SNORA4,SNORA63,SNORA81,SNORD2,ST6GAL1,TBCCD1,TRA2B	EIF4A2,ETV5
MDAMB468	0.75	3:187835301-188473600	DEL	638300	7	AC022498.1,AC063932.1,LPP,LPP-AS1,LPP-AS2,MIR28,RP11-430L16.1	LPP
MDAMB468	0.75	3:195724201-196760600	DEL	1036400	37	AC069257.8,AC127904.2,CEP19,CTD-2002J20.1,FBXO45,LINC00885,LINC01063,MFI2-AS1,NCBP2,NCBP2-AS1,NCBP2-AS2,NRROS,PAK2,PCYT1A,PIGX,PIGZ,RN7SL434P,RN7SL738P,RNF168,RNU6-1279P,RNU6-42P,RNU6-646P,RNU6-910P,RNU7-18P,SENP5,SLC51A,SMCO1,TCTEX1D2,TFRC,TM4SF19,TM4SF19-AS1,U4,UBXN7,UBXN7-AS1,WDR53,Y_RNA,ZDHHC19	PAK2,TFRC
MDAMB468	0.75	4:71454201-74409700	DEL	2955500	32	ADAMTS3,AFM,AFP,ALB,AMBN,ANKRD17,COX18,DCK,ENAM,GC,GRSF1,IGJ,MOB1B,NPFFR2,RNA5SP163,RNU4ATAC9P,RNU6-459P,RNU6-520P,RNU6-784P,RNU6-891P,RNU6ATAC5P,RP11-352E8.2,RP11-373J21.1,RP11-46J23.1,RP11-545L5.1,RP11-622A1.2,RP11-692D12.1,RUFY3,SLC4A4,SNORA3,UTP3,snoU13	ANKRD17,COX18,DCK
MDAMB468	0.75	4:88486301-91595300	DEL	3109000	38	ABCG2,AC083829.1,DMP1,DSPP,FAM13A,FAM13A-AS1,GPRIN3,HERC3,HERC5,HERC6,IBSP,MEPE,MMRN1,NAP1L5,PIGY,PKD2,PPM1K,PYURF,RN7SKP244,RN7SKP248,RNU1-36P,RNU6-112P,RNU6-1298P,RNU6-33P,RNU6-818P,RNU6-907P,RNU6ATAC31P,RP11-10L7.1,RP11-115D19.1,RP11-67M1.1,RP11-742B18.1,RP11-84C13.1,RP11-84C13.2,SNCA,SPP1,TIGD2,Y_RNA,snoU13	DMP1
MDAMB468	0.75	5:54479401-55303900	DEL	824500	13	AC008914.1,CTD-2031P19.3,CTD-2031P19.5,DDX4,DHX29,IL31RA,IL6ST,MIR5687,PPAP2A,RNA5SP183,RP11-506H20.1,SKIV2L2,snoU13	IL6ST
MDAMB468	0.75	5:57892101-59964300	DEL	2072200	11	CTD-2176I21.2,CTD-2254N19.1,DEPDC1B,FKSG52,MIR582,PART1,PDE4D,RAB3C,RNU6-806P,RP11-266N13.2,RP11-479O16.1	PDE4D
MDAMB468	0.75	5:74534701-75733100	DEL	1198400	17	ANKDD1B,COL4A3BP,CTC-235G5.3,CTC-366B18.2,CTC-366B18.4,CTD-2235C13.2,CTD-2235C13.3,HMGCR,IQGAP2,POC5,POLK,RNA5SP186,RNU6-680P,RNU7-175P,RP11-466P24.6,RP11-466P24.7,SV2C	POLK
MDAMB468	0.75	9:5687001-7667800	DEL	1980800	19	C9orf38,GLDC,IL33,KDM4C,KIAA1432,MIR4665,MLANA,RANBP6,RN7SL123P,RN7SL25P,RP11-207C16.4,RP11-218I7.2,RP11-307L3.4,RP11-390F4.10,RP11-390F4.3,RP11-390F4.6,RP11-403H13.1,TPD52L3,snoU13	KDM4C
MDAMB468	0.75	9:102918135-128462506	DEL	25544371	99	ABCA1,ACTL7A,ACTL7B,AKAP2,AL137019.1,AL162389.1,AL353805.1,AL358815.1,AL359552.1,AL391867.1,AL591377.1,ALDOB,BAAT,C9orf152,CTNNAL1,CYLC2,EPB41L4B,FAM206A,FKTN,FRRS1L,FSD1L,GRIN3A,INVS,LINC00587,LPAR1,LPPR1,MIR32,MIR3927,MRPL50,MSANTD3,MSANTD3-TMEFF1,MURC,MUSK,NIPSNAP3A,OR13C2,OR13C3,OR13C4,OR13C5,OR13C8,OR13C9,OR13D1,OR13F1,PALM2,PALM2-AKAP2,PPP3R2,PTPN3,RAD23B,RN7SKP191,RN7SKP77,RN7SKP87,RN7SL65…	RNF20,SMC2,TAL2
MDAMB468	0.75	10:14610701-15957300	DEL	1346600	18	ACBD7,C10orf111,CDNF,DCLRE1C,FAM107B,FAM171A1,FAM188A,HSPA14,ITGA8,MEIG1,NMT2,OLAH,RNA5SP302,RP11-25G10.2,RP11-398C13.6,RP11-7C6.1,RPP38,snoU13	DCLRE1C
MDAMB468	0.75	10:101600601-104401300	DEL	2800700	82	ABCC2,ACTR1A,AL160011.1,BLOC1S2,BTRC,C10orf2,C10orf76,C10orf95,CHUK,CPN1,CUEDC2,CWF19L1,DNMBP,DNMBP-AS1,DPCD,ELOVL3,ERLIN1,FAM178A,FBXL15,FBXW4,GBF1,HIF1AN,HPS6,HUG1,KAZALD1,KCNIP2,KCNIP2-AS1,LBX1,LBX1-AS1,LDB1,LINC00263,LZTS2,MGEA5,MIR146B,MIR3158-2,MIR608,MRPL43,NDUFB8,NFKB2,NOLC1,NPM3,PAX2,PITX3,PKD2L1,POLL,PPRC1,PSD,RN7SL21P,RNU2-43P,RNU2-59P,RNU6-1165P,RNU6-422P,RNU6-43P,RP11-107I14.2,RP11-1…	ABCC2,NFKB2,SUFU,TLX1
MDAMB468	0.75	11:90979101-92869800	DEL	1890700	7	FAT3,MTNR1B,RP11-201M22.1,RP11-203F8.1,RP11-675M1.2,RP11-676F20.1,snoU13	FAT3
MDAMB468	0.75	12:186701-1272200	DEL	1085500	26	B4GALNT3,CCDC77,ERC1,IQSEC3,KDM5A,NINJ2,RAD52,RN7SL852P,RNU4ATAC16P,RNU7-103P,RP11-218M22.1,RP11-218M22.2,RP11-283I3.1,RP11-283I3.2,RP11-283I3.4,RP11-283I3.6,RP11-359B12.2,RP11-598F7.3,RP11-598F7.4,RP11-598F7.5,RP11-598F7.6,RP5-1154L15.1,RP5-1154L15.2,SLC6A12,SLC6A13,WNK1	ERC1,KDM5A
MDAMB468	0.75	12:30085801-32501800	DEL	2416000	33	AC023050.1,AC023157.1,AC024940.1,AMN1,BICD1,DDX11,DDX11-AS1,DENND5B,DENND5B-AS1,H3F3C,IPO8,KIAA1551,LINC00941,METTL20,RNA5SP356,RNU5F-4P,RNU6-1069P,RNU6-318P,RNU6-618P,RP11-155I9.1,RP11-428G5.5,RP11-551L14.4,RP11-551L14.6,RP11-771K4.1,RP11-776A13.1,RP11-776A13.3,RP11-77I22.2,RP11-843B15.2,SNORA25,SNORA75,TSPAN11,Y_RNA,snoU13	DDX11,H3F3C
MDAMB468	0.75	12:123928001-124586500	DEL	658500	23	ATP6V0A2,CCDC92,DNAH10,DNAH10OS,EIF2B1,FAM101A,MIR3908,RILPL1,RP11-214K3.18,RP11-214K3.19,RP11-214K3.20,RP11-214K3.21,RP11-214K3.22,RP11-214K3.23,RP11-214K3.24,RP11-338K17.8,RP11-380L11.3,RP11-380L11.4,RP11-486O12.2,SNORA9,SNRNP35,TMED2,ZNF664	FAM101A
MDAMB468	0.75	16:9684001-10415600	DEL	731600	6	GRIN2A,RN7SL493P,RNA5SP404,RP11-297M9.1,RP11-297M9.2,RP11-895K13.2	GRIN2A
MDAMB468	0.75	16:30302201-32107300	DEL	1805100	95	AC002310.12,AC002310.13,AC002310.7,AC002519.8,AC026471.6,AC106782.20,AC135048.1,AC135048.13,AC135050.1,AC135050.5,AC142381.1,AHSP,ARMC5,BCKDK,BCL7C,C16orf58,C16orf93,C16orf98,CD2BP2,COX6A2,CTD-2014E2.2,CTD-2014E2.6,CTD-2358C21.3,CTD-2358C21.4,CTF1,DCTPP1,FBRS,FBXL19,FBXL19-AS1,FUS,HSD3B7,IGHV3OR16-9,ITGAD,ITGAL,ITGAM,KAT8,MIR4518,MIR4519,MIR762,MYLPF,ORAI3,PHKG2,PRSS36,PRSS53,PRSS8,PYCARD,PYDC1,R…	FUS,PRSS8,ZNF668
MDAMB468	0.75	17:29932501-34489900	DEL	4557400	100	AC005549.1,AC005549.2,AC005549.3,AC011193.1,AC024610.1,AC084809.2,AC084809.3,AC090616.2,AC116407.1,AC116407.2,ASIC2,C17orf102,C17orf75,CCL1,CCL11,CCL13,CCL2,CCL7,CCL8,CCT6B,CDK5R1,COPRS,CTC-304I17.2,CTC-304I17.3,CTC-304I17.4,CTC-304I17.5,CTC-542B22.1,CTC-542B22.2,FNDC8,LIG3,LRRC37B,MIR632,MYO1D,NLE1,PSMD11,RAD51D,RAD51L3-RFFL,RFFL,RHOT1,RNA5SP437,RNA5SP438,RNU6-1134P,RNU6-840P,RP1-29G21.1,RP1-41C…	CCT6B,RAD51D,SUZ12
MDAMB468	0.75	17:34807901-36252000	DEL	1444100	34	AATF,AC091199.1,ACACA,C17orf78,CTB-75G16.3,CTC-268N12.2,CTC-268N12.3,CTD-3194G12.1,CTD-3194G12.2,DHRS11,DUSP14,GGNBP2,HNF1B,LHX1,MIR2909,MRM1,MYO19,PIGW,RNA5SP439,RP11-115K3.1,RP11-333J10.2,RP11-333J10.3,RP11-378E13.3,RP11-378E13.4,RP11-445F12.1,RP11-445F12.2,RP11-697E22.1,RP11-697E22.2,RP11-697E22.3,SYNRG,TADA2A,TBC1D3G,TBC1D3H,ZNHIT3	HNF1B
MDAMB468	0.75	17:55490701-55689900	DEL	199200	3	MSI2,RP11-118E18.2,RP11-118E18.4	MSI2
MDAMB468	0.75	17:56302401-57288400	DEL	986000	34	AC023992.1,AC099850.1,AC100832.1,BZRAP1-AS1,C17orf47,CTD-2510F5.4,CTD-2510F5.6,HSF5,LPO,MIR142,MIR301A,MIR454,MIR4736,MPO,MTMR4,PPM1E,PRR11,RAD51C,RN7SL716P,RNF43,RNU1-108P,RNU1-52P,RNU1-60P,RNU1-85P,RNU2-58P,RNU6-518P,RP11-112H10.4,RP11-579O24.3,SEPT4,SKA2,SMG8,TEX14,TRIM37,U3	MIR142,RAD51C,RNF43,TRIM37
MDAMB468	0.75	18:21903301-23751300	DEL	1848000	19	CTD-2006O16.2,HRH4,IMPACT,OSBPL1A,PSMA8,RN7SL97P,RP11-178F10.1,RP11-178F10.2,RP11-178F10.3,RP11-449D8.1,RP11-449D8.2,RP11-449D8.5,RP11-621L6.2,RP11-621L6.3,RP11-958F21.1,RP11-958F21.3,SS18,Y_RNA,ZNF521	SS18,ZNF521
MDAMB468	0.74	3:70094101-75736700	DEL	5642600	51	AC096971.1,AC112219.1,AC117481.1,AC128653.1,AC133041.1,AC134025.1,AC139453.1,CNTN3,CTD-2026G6.3,EBLN2,EIF4E3,FOXP1,FOXP1-AS1,FOXP1-IT1,FRG2C,GPR27,GXYLT2,LINC00870,LINC00877,LINC00960,MIR1284,MIR1324,MIR4444-1,PDZRN3,PDZRN3-AS1,PPP4R2,PROK2,RN7SL271P,RN7SL294P,RNA5SP136,RNU1-62P,RNU2-64P,RNU6-1270P,RNU6-281P,RNU6-557P,RNU7-119P,RNU7-19P,RP11-154H23.3,RP11-20B7.1,RP11-231I13.2,RP11-398A8.4,RP11-43…	FOXP1
MDAMB468	0.74	4:39620701-40297100	DEL	676400	14	N4BP2,PDS5A,RHOH,RN7SL558P,RNA5SP159,RNU6-1112P,RNU7-11P,RP11-395I6.2,RP11-395I6.3,RP11-539G18.2,SMIM14,SNORA51,UBE2K,Y_RNA	N4BP2,PDS5A,RHOH
MDAMB468	0.74	4:95757001-99514100	DEL	3757100	17	AC034154.1,BMPR1B,PDHA2,RAP1GDS1,RN7SKP28,RNU6-1059P,RNU6-34P,RP11-145G20.1,RP11-323J4.1,RP11-431J17.1,RP11-681L8.1,RP11-710C12.1,RP11-724M22.1,STPG2,STPG2-AS1,UNC5C,Y_RNA	RAP1GDS1
MDAMB468	0.74	4:104033301-106229200	DEL	2195900	21	AC004052.1,AC004053.1,AC004063.1,AC004069.2,AC093628.1,CENPE,CXXC4,RN7SL89P,RNU6-351P,RNU6-635P,RP11-297P16.3,RP11-297P16.4,RP11-328K4.1,RP11-556I14.1,RP11-556I14.2,RP11-703G6.1,RP11-729M20.1,SNORA31,TACR3,TET2,TET2-AS1	TET2
MDAMB468	0.74	4:108277501-110675300	DEL	2397800	26	AC004051.2,AC004067.5,AC084209.1,AC097473.1,CASP6,CCDC109B,CYP2U1,ETNPPL,HADH,LEF1,LEF1-AS1,MIR576,OSTC,PAPSS1,PLA2G12A,RN7SL55P,RNU6-431P,RNU6-551P,RNU6-733P,RP11-286E11.1,RP11-286E11.2,RPL34,RPL34-AS1,SEC24B,SEC24B-AS1,SGMS2	LEF1
MDAMB468	0.74	5:60001701-64526900	DEL	4525200	35	AC008498.1,AC008836.1,AC104113.3,ADAMTS6,C5orf64,CKS1B,CTC-436P18.1,CTC-436P18.3,CTD-2170G1.2,CTD-2244C20.2,CWC27,DIMT1,ELOVL7,FAM159B,HTR1A,IPO11,KIF2A,LRRC70,NDUFAF2,RGS7BP,RN7SKP157,RN7SL169P,RNF180,RNU6-294P,RNU6-661P,RNU6-913P,RP11-158J3.2,RP11-231G3.1,RP11-2O17.2,RP11-307L14.1,RP11-307L14.2,SMIM15,SREK1IP1,Y_RNA,ZSWIM6	CKS1B
MDAMB468	0.74	5:79513001-80592300	DEL	1079300	18	ANKRD34B,CKMT2,CKMT2-AS1,CTC-325J23.2,CTC-325J23.3,CTC-459I6.1,CTD-2015H6.3,CTD-2193P3.2,DHFR,MSH3,MTRNR2L2,RASGRF2,RNU6-211P,SERINC5,SNORA31,SPZ1,ZFYVE16,snoU13	MSH3,RASGRF2
MDAMB468	0.74	6:144547101-150087100	DEL	5540000	52	ADGB,AL033378.1,AL356739.1,AL603766.1,EPM2A,FBXO30,GINM1,KATNA1,LATS1,NUP43,PCMT1,PPIL4,RAB32,RN7SL234P,RNA5SP222,RNU1-33P,RNU6-1222P,RNU6-734P,RNU7-3P,RP1-111D6.2,RP1-111D6.3,RP1-12G14.5,RP1-12G14.6,RP1-12G14.7,RP1-91J24.3,RP11-162J8.2,RP11-162J8.3,RP11-242F11.2,RP11-307P5.1,RP11-307P5.2,RP11-361F15.2,RP11-497D6.3,RP11-497D6.5,RP11-545I5.3,RP11-631F7.1,RP11-631F7.2,RP11-715G15.1,RP3-337D23.3,RP3…	SHPRH
MDAMB468	0.74	6:150823701-154846600	DEL	4022900	48	AKAP12,AL080276.1,AL133260.1,AL133269.1,AL358134.1,AL358134.2,AL590867.1,C6orf211,CCDC170,CNKSR3,ESR1,FBXO5,IPCEF1,MTHFD1L,MTRF1L,MYCT1,OPRM1,PLEKHG1,RGS17,RMND1,RN7SKP268,RNA5SP223,RNA5SP224,RNA5SP225,RNU6-1247P,RNU6-300P,RNU6-302P,RNU6-813P,RNU6-896P,RNY4P20,RP1-101K10.6,RP1-200K18.1,RP1-292B18.3,RP1-292B18.4,RP1-297M16.2,RP11-133I21.2,RP11-136K14.1,RP11-136K14.2,RP11-136K14.3,RP11-475C16.2,RP3…	ESR1,SYNE1,ZBTB2
MDAMB468	0.74	6:156358601-157468700	DEL	1110100	8	ARID1B,MIR4466,RP1-137K2.2,RP11-230C9.2,RP11-230C9.3,RP11-230C9.4,RP11-518I13.1,SNORD28	ARID1B
MDAMB468	0.74	6:167197701-167746200	DEL	548500	14	CCR6,FGFR1OP,GPR31,MIR3939,RNASET2,RP1-167A14.2,RP11-514O12.4,RP11-568A7.2,RP11-568A7.3,RPS6KA2,RPS6KA2-AS1,TCP10L2,TTLL2,UNC93A	FGFR1OP
MDAMB468	0.74	7:76693701-78862700	DEL	2169000	18	AC073635.5,CCDC146,FGL2,MAGI2,MAGI2-AS1,MAGI2-AS2,MAGI2-IT1,PHTF2,PTPN12,RNU6-337P,RP11-467H10.2,RP5-1185I7.1,RP5-899E9.1,RSBN1L,RSBN1L-AS1,TMEM60,Y_RNA,snoU13	MAGI2
MDAMB468	0.74	7:151796201-151932600	DEL	136400	3	GALNT11,KMT2C,RP5-981O7.2	KMT2C
MDAMB468	0.74	8:55193501-58118300	DEL	2924800	38	AC018607.1,AC025674.1,AC100817.1,CHCHD7,CTA-397H3.3,IMPAD1,LINC00968,LYN,MOS,PENK,PLAG1,RN7SL250P,RN7SL323P,RN7SL798P,RNA5SP265,RNA5SP266,RNU105C,RNU6-13P,RP1,RP11-140I16.3,RP11-17A4.2,RP11-17A4.3,RP11-17A4.4,RP11-318K15.2,RP11-386G21.1,RP11-386G21.2,RP11-446E9.2,RP11-513O17.2,RP11-53M11.3,RP11-628E19.2,RPS20,SDR16C5,SNORA1,SNORA3,SNORD54,SOX17,TGS1,XKR4	LYN,PLAG1,SOX17
MDAMB468	0.74	8:71657001-73763300	DEL	2106300	17	AC099805.1,AC104012.1,EYA1,KCNB2,MSC,RNA5SP271,RP11-1102P16.1,RP11-1144P22.1,RP11-142A23.1,RP11-281N10.1,RP11-313C15.1,RP11-326E22.1,RP11-351E7.1,RP11-383H13.1,TRPA1,U8,Y_RNA	KCNB2
MDAMB468	0.74	8:108569301-112165200	DEL	3595900	23	EBAG9,EMC2,KB-1299A7.2,KCNV1,NUDCD1,PKHD1L1,RNA5SP275,RNU2-67P,RP11-1084E5.1,RP11-122A21.2,RP11-211F2.1,RP11-238I10.1,RP11-35G22.1,RP11-422N16.3,RP11-696P8.2,RP11-790J24.1,RP11-946L20.2,RP11-946L20.4,RSPO2,SNORD112,SYBU,TMEM74,TRHR	PKHD1L1,RSPO2
MDAMB468	0.74	10:21812201-22006600	DEL	194400	4	MLLT10,RNU6-1141P,RNU6-306P,SKIDA1	MLLT10
MDAMB468	0.74	11:117045099-117049919	DEL	4820	2	PAFAH1B2,SIDT2	PAFAH1B2
MDAMB468	0.74	12:38504901-44503300	DEL	5998400	53	ABCD2,AC020629.1,AC023513.1,AC067735.1,AC079603.1,AC079630.2,AC079630.4,AC117372.1,AC121334.1,AC121336.1,ADAMTS20,ALG10B,C12orf40,CNTN1,CPNE8,GXYLT1,IRAK4,LRRK2,MUC19,PDZRN4,PPHLN1,PRICKLE1,PUS7L,RN7SL10P,RNA5SP358,RNA5SP359,RNA5SP360,RNU6-249P,RNU6-713P,RP11-115F18.1,RP11-118A3.1,RP11-25I15.2,RP11-25I15.3,RP11-328C8.4,RP11-328C8.5,RP11-350F4.2,RP11-396F22.1,RP11-413B19.2,RP11-476D10.1,RP11-547C5…	LRRK2
MDAMB468	0.74	12:90935401-92712000	DEL	1776600	16	BTG1,C12orf79,CCER1,DCN,EPYC,KERA,LINC00615,LUM,RP11-1041F24.1,RP11-121E16.1,RP11-20L19.1,RP11-587P21.2,RP11-587P21.3,RP11-632B21.1,RP11-796E2.4,Y_RNA	BTG1
MDAMB468	0.74	12:97218801-103901300	DEL	6682500	74	AC010203.1,AC010209.1,AC013283.1,AC068643.1,AC069227.1,ACTR6,APAF1,ARL1,ASCL1,CHPT1,DRAM1,FAM71C,GAS2L3,GNPTAB,IGF1,IKBIP,LINC00485,MIR1251,MIR135A2,MIR4303,MIR4495,MYBPC1,NEDD1,NR1H4,PAH,PARPBP,PMCH,RMST,RN7SL176P,RN7SL179P,RN7SL793P,RNA5SP366,RNA5SP367,RNA5SP368,RNA5SP369,RNU4-41P,RNU5E-5P,RNU6-101P,RNU6-1068P,RNU6-1183P,RNU6-172P,RNU6-36P,RNU6-768P,RNU7-184P,RP11-175P13.2,RP11-181C3.1,RP11-263…	IGF1
MDAMB468	0.74	12:114311501-119902100	DEL	5590600	78	AC026366.1,AC060226.1,AC069240.1,C12orf49,CCDC60,FBXO21,FBXW8,HRK,HSPB8,KSR2,LINC00173,MAP1LC3B2,MED13L,MIR4472-2,MIR620,NOS1,PEBP1,RBM19,RFC5,RN7SKP216,RN7SL508P,RN7SL865P,RNA5SP374,RNFT2,RNU6-1188P,RNU6-558P,RP11-100F15.1,RP11-100F15.2,RP11-1028N23.2,RP11-1028N23.3,RP11-1028N23.4,RP11-103B5.2,RP11-110L15.1,RP11-110L15.2,RP11-115H15.2,RP11-116D17.1,RP11-116D17.2,RP11-116D17.3,RP11-121J20.1,RP11-…	TBX3
MDAMB468	0.74	12:120859001-122546266	DEL	1687266	50	AC079602.1,AC084018.1,AC156455.1,ACADS,AL021546.6,BCL7A,C12orf43,CABP1,CAMKK2,COQ5,DYNLL1,DYNLL1-AS1,GATC,HNF1A,HNF1A-AS1,HPD,KDM2B,MIR4700,MLEC,MLXIP,MORN3,OASL,ORAI1,P2RX4,POP5,PSMD9,RHOF,RNF10,RNF34,RNU6-1004P,RNU7-170P,RP11-173P15.3,RP11-173P15.5,RP11-173P15.7,RP11-216P16.2,RP11-340F14.5,RP11-347I19.8,RP11-711D18.2,RP11-728G15.1,RP11-7M8.2,RP11-87C12.5,RP13-941N14.1,SETD1B,SNORA70,SPPL3,SRSF9…	BCL7A,HNF1A,KDM2B
MDAMB468	0.74	14:93378601-99436000	DEL	6057400	95	AK7,AL132796.1,AL133167.1,AL133168.3,AL137190.1,AL163760.1,ASB2,ATG2B,BDKRB1,BDKRB2,C14orf132,C14orf142,C14orf177,C14orf64,CHGA,CLMN,COX8C,CTD-2240H23.2,CTD-2506J14.1,DICER1,DICER1-AS1,DKFZP434O1614,FAM181A,FAM181A-AS1,GLRX5,GSC,GSKIP,IFI27,IFI27L1,ITPK1,ITPK1-AS1,LINC00341,LINC00521,LINC00617,LINC00618,MIR3173,MIR4506,MOAP1,OTUB2,PAPOLA,PPP4R4,PRIMA1,RN7SKP108,RN7SL710P,RN7SL714P,RNU2-33P,RNU6-1…	DICER1,SERPINA1,TCL1A
MDAMB468	0.74	16:12002401-13147100	DEL	1144700	22	AC007216.1,AC007216.2,AC092380.1,ACA64,CPPED1,CTD-2583P5.1,CTD-2583P5.3,CTD-3037G24.3,CTD-3037G24.4,GSPT1,MIR4718,RP11-165M1.2,RP11-165M1.3,RP11-166B2.1,RP11-166B2.5,RP11-166B2.7,RP11-276H1.2,RP11-276H1.3,RP11-552C15.1,SHISA9,SNORA27,TNFRSF17	TNFRSF17
MDAMB468	0.74	16:15436601-16420700	DEL	984100	27	ABCC1,ABCC6,AF001548.5,AF001548.6,C16orf45,CTA-972D3.2,CTB-193M12.1,CTB-193M12.3,FOPNL,KIAA0430,MIR3179-2,MIR3180-2,MIR3670-2,MIR484,MPV17L,MYH11,NDE1,NOMO3,NPIPA5,NPIPA7,RNU6-213P,RP11-1021N1.1,RP11-517A5.4,RP11-517A5.5,RP11-517A5.7,Y_RNA,hsa-mir-3180-3	MYH11
MDAMB468	0.74	16:22710801-28443900	DEL	5733100	80	AC002331.1,AC002551.1,AC004125.3,AC008938.1,AC009035.1,AC009158.1,AC012317.1,AC016597.1,AQP8,ARHGAP17,C16orf82,CACNG3,CHP2,COG7,CTA-249B10.1,CTC-391G2.1,CTD-2049O4.1,CTD-2196E14.3,CTD-2196E14.4,CTD-2196E14.5,CTD-2196E14.6,CTD-2196E14.9,CTD-2270L9.2,CTD-2270L9.4,CTD-2313J23.1,CTD-2385L22.1,CTD-2515A14.1,CTD-2540M10.1,CTD-2547G23.2,CTD-3203P2.1,CTD-3203P2.2,DCTN5,EARS2,EIF3CL,ERN2,GGA2,GSG1L,GTF3C1…	IL21R,PALB2
MDAMB468	0.74	16:67513801-69405300	DEL	1891500	80	AC009095.4,AC040162.1,AC130462.1,ACD,AGRP,CDH1,CDH3,CHTF8,CIRH1A,COG8,CTC-479C5.10,CTC-479C5.17,CTC-479C5.6,CTCF,CTD-2012K14.2,CTD-2012K14.3,CTD-2012K14.4,CTD-2012K14.6,CTD-2012K14.7,CTRL,DDX28,DPEP2,DPEP3,DUS2,EDC4,ENKD1,ESRP2,FAM65A,GFOD2,HAS3,LCAT,NIP7,NRN1L,NUTF2,PARD6A,PDF,PLA2G15,PRMT7,PSMB10,RANBP10,RLTPR,RNA5SP429,RNU4-30P,RNU4-36P,RNU6-1262P,RNU6-22P,RNU6-359P,RNU6-898P,RP11-167P11.2,RP1…	CDH1,CTCF
MDAMB468	0.74	16:70224201-70553300	DEL	329100	14	AARS,AC009060.1,DDX19A,DDX19B,EXOSC6,FKSG63,FUK,RN7SL279P,RN7SL407P,RNU6-23P,RP11-529K1.2,RP11-529K1.4,ST3GAL2,snoU13	EXOSC6
MDAMB468	0.74	16:71013001-73108400	DEL	2095400	54	AC002044.4,AC004158.2,AC004158.3,AC004943.1,AC092289.1,AC106736.1,AC132068.1,AP1G1,ATXN1L,CALB2,CHST4,CMTR2,CTD-2520I13.1,DHODH,DHX38,HP,HPR,HYDIN,IST1,MARVELD3,PKD1L3,PMFBP1,RNU6-1061P,RNU6-208P,RNU6-385P,RNU7-71P,RNU7-90P,RP11-23E19.1,RP11-23E19.2,RP11-328J14.1,RP11-346C20.3,RP11-346C20.4,RP11-384M15.3,RP11-432I5.1,RP11-432I5.2,RP11-432I5.4,RP11-432I5.6,RP11-432I5.8,RP11-498D10.3,RP11-498D10.5,…	HYDIN
MDAMB468	0.74	17:2970501-6464500	DEL	3494000	99	AC012146.7,AC091153.4,AC109333.10,AC118754.4,ALOX15,ANKFY1,ARRB2,ASPA,ATP2A3,C17orf107,C17orf85,CAMKK1,CAMTA2,CHRNE,CTC-524C5.2,CTD-2309O5.3,CTD-3195I5.1,CTD-3195I5.3,CTD-3195I5.4,CTD-3195I5.5,CTNS,CXCL16,CYB5D2,EMC6,ENO3,GGT6,GLTPD2,GP1BA,GSG2,INCA1,ITGAE,KIF1C,MED11,MINK1,MYBBP1A,NUP88,OR1A1,OR1A2,OR1D2,OR1E1,OR1E2,OR1G1,OR3A1,OR3A2,OR3A3,P2RX5,PELP1,PFN1,PLD2,PSMB6,RABEP1,RN7SL171P,RN7SL774P,R…	RABEP1,USP6
MDAMB468	0.74	17:6988601-9520600	DEL	2532000	99	AC007421.1,AC025335.1,AC113189.5,AC129492.1,AC129492.6,AC135178.1,AC135178.7,ACADVL,ACAP1,ALOX12B,ALOX15B,ALOXE3,ARHGEF15,ASGR1,ASGR2,ATP1B2,AURKB,C17orf59,C17orf74,CD68,CHD3,CHRNB1,CLDN7,CNTROB,CTDNEP1,CYB5D1,DNAH2,DVL2,EFNB3,EIF5A,ELP5,FGF11,FXR2,GABARAP,GPS2,GUCY2D,HES7,KCNAB3,KCTD11,KDM6B,LINC00324,LSMD1,MIR324,MIR4314,MPDU1,NEURL4,NLGN2,ODF4,PER1,PFAS,PHF23,POLR2A,RANGRF,RP1-4G17.2,RP11-104H…	AURKB,PER1,TP53
MDAMB468	0.74	17:46764201-48103000	DEL	1338800	58	ABI3,AC006487.1,AC091133.1,AC105030.1,ATP5G1,B4GALNT2,CALCOCO2,CTD-2377D24.4,CTD-2377D24.6,CTD-2377D24.8,DLX3,DLX4,FAM117A,GIP,GNGT2,HOXB13,IGF2BP1,KAT7,MIR3185,Metazoa_SRP,NGFR,NXPH3,PHB,PHOSPHO1,PRAC1,PRAC2,RN7SL125P,RNU1-42P,RNU6-1313P,RNU6-826P,RNU7-135P,RP1-62O9.3,RP11-1079K10.2,RP11-1079K10.3,RP11-1079K10.4,RP11-1079K10.5,RP11-1094H24.3,RP11-304F15.3,RP11-304F15.4,RP11-304F15.6,RP11-304F15.…	NGFR,SPOP
MDAMB468	0.74	18:57076101-59639300	DEL	2563200	24	AC010928.1,AC098847.1,CCBE1,CDH20,MC4R,PMAIP1,RN7SL342P,RNF152,RNU4-17P,RNU6-116P,RNU6-567P,RP11-1096D5.1,RP11-1096D5.2,RP11-27G24.3,RP11-2N1.1,RP11-2N1.2,RP11-325K19.1,RP11-396N11.1,RP11-760L24.1,RP11-795H16.3,RP11-866E20.3,RP11-879F14.1,RP11-879F14.2,RP11-879F14.3	CDH20
MDAMB468	0.74	19:39625091-39625417	DEL	326	1	PAK4	PAK4
MDAMB468	0.74	20:56830423-57986065	DEL	1155642	28	AL035250.1,AL050327.1,APCDD1L,APCDD1L-AS1,ATP5E,CTSZ,EDN3,GNAS,GNAS-AS1,MGC4294,MIR296,MIR298,NELFCD,NPEPL1,RAB22A,RP1-309F20.3,RP1-309F20.4,RP11-261P9.4,RP4-614C15.2,RP4-614C15.3,RP4-806M20.3,RP4-806M20.5,RP5-907D15.3,SLMO2,STX16,TUBB1,VAPB,ZNF831	GNAS
MDAMB468	0.73	3:59147501-63122300	DEL	3974800	15	C3orf14,CADPS,FEZF2,FHIT,LINC00698,NPCDR1,PTPRG,PTPRG-AS1,RN7SL863P,RNU2-10P,RNU6-139P,RP11-285B24.1,RP11-719N22.2,U3,Y_RNA	FHIT
MDAMB468	0.73	3:77818101-79179000	DEL	1360900	9	AC134729.1,RN7SKP61,RN7SL647P,RN7SL751P,RNU6-217P,ROBO1,RP11-314M24.1,RP11-354H21.1,RP11-354H21.2	ROBO1
MDAMB468	0.73	3:178676101-180148400	DEL	1472300	27	AC007620.3,ACTL6A,GNB4,KCNMB3,MFN1,MRPL47,PEX5L,PEX5L-AS1,PEX5L-AS2,PIK3CA,RNA5SP149,RP11-145M9.4,RP11-145M9.5,RP11-145M9.6,RP11-15L13.4,RP11-245C23.3,RP11-255C15.3,RP11-255C15.4,RP11-360P21.2,RP11-420J11.2,RP11-494H4.3,SNORA25,USP13,Y_RNA,ZMAT3,ZNF639,snoU13	PIK3CA
MDAMB468	0.73	4:1456051-2843300	DEL	1387250	32	C4orf48,FAM193A,FAM53A,FGFR3,HAUS3,LETM1,MIR4800,MIR943,MXD4,NAT8L,NELFA,POLN,RN7SL589P,RN7SL671P,RNF4,RP11-1398P2.1,RP11-317B7.3,RP11-478C1.7,RP11-503N18.1,RP11-503N18.3,RP11-503N18.4,RP11-572O17.1,RP13-1016M1.2,SCARNA22,SH3BP2,SLBP,TACC3,TMEM129,TNIP2,WHSC1,Y_RNA,ZFYVE28	FGFR3,LETM1,WHSC1
MDAMB468	0.73	7:72527801-74148500	DEL	1620700	37	AC004851.1,AC083884.8,BAZ1B,CLDN3,CLDN4,CLIP2,CTB-51J22.1,DNAJC30,EIF4H,ELN,FKBP6,FZD9,GTF2I,GTF2IRD1,LAT2,LIMK1,LINC00035,MIR4284,MIR590,MLXIPL,NSUN5,RFC2,RN7SL265P,RNA5SP233,RNU6-1070P,RNU6-1080P,RNU6-1198P,RP11-731K22.1,RP5-1186P10.2,STX1A,TBL2,TRIM50,VPS37D,WBSCR22,WBSCR27,WBSCR28,Y_RNA	CLIP2,ELN,FZD9
MDAMB468	0.73	7:74985501-75896200	DEL	910700	16	AC006014.1,CCL24,CCL26,HIP1,MDH2,MIR4651,POR,RHBDD2,RN7SL642P,RNU6-863P,SNORA14A,SRRM3,STYXL1,TRIM73,Y_RNA,snoU13	HIP1
MDAMB468	0.73	7:93327101-96476700	DEL	3149600	39	AC002076.10,AC002429.5,AC002451.1,AC002451.3,AC003092.1,AC003092.2,AC004012.1,AC004458.1,AC006378.2,AC084368.1,ASB4,C7orf76,CASD1,COL1A2,DYNC1I1,GNG11,GNGT1,GS1-293C5.1,MIR4652,MIR591,PDK4,PEG10,PON1,PON2,PON3,PPP1R9A,RN7SKP129,RNU4-16P,RNU6-1328P,RNU6-364P,RNU6-532P,RNU6-956P,RNU7-188P,RP11-682N22.1,SGCE,SHFM1,SLC25A13,TFPI2,snoU13	SGCE,SLC25A13
MDAMB468	0.73	7:158127301-159128648	DEL	1001348	9	AC078942.1,ESYT2,LINC00689,LINC01022,MIR5707,MIR595,PTPRN2,VIPR2,WDR60	PTPRN2
MDAMB468	0.73	8:14946101-15436700	DEL	490600	3	AC091559.1,SGCZ,TUSC3	TUSC3
MDAMB468	0.73	8:30764901-34204400	DEL	3439500	33	AC104037.1,DUSP26,FUT10,MAK16,NRG1,NRG1-IT1,NRG1-IT2,NRG1-IT3,PURG,RN7SL457P,RN7SL621P,RNA5SP261,RNA5SP262,RNA5SP263,RNF122,RNU6-528P,RNU6-663P,RP1-273G13.3,RP1-84O15.2,RP11-1002K11.1,RP11-11N9.4,RP11-317N12.1,RP11-363L24.3,RP11-431M3.1,RP11-431M3.2,RP11-566H8.1,RP11-566H8.2,RP11-566H8.3,RP11-722E23.2,SNORA70,SNORD13,TTI2,WRN	WRN
MDAMB468	0.73	8:68646901-69275000	DEL	628100	6	C8orf34,PREX2,RP11-396J6.1,RP11-403D15.2,RP11-664D7.4,Y_RNA	PREX2
MDAMB468	0.73	8:69277801-71624100	DEL	2346300	27	AC090574.1,AC120194.1,C8orf34,LACTB2,Metazoa_SRP,NCOA2,PRDM14,RN7SKP29,RN7SL19P,RN7SL675P,RNA5SP269,RNA5SP270,RNU1-101P,RNU7-102P,RP11-102F4.2,RP11-159H10.3,RP11-21C17.1,RP11-333A23.4,RP11-382J12.1,RP11-600K15.1,RP11-744J10.3,RP11-865I6.2,SLCO5A1,SULF1,TRAM1,Y_RNA,snoU13	NCOA2
MDAMB468	0.73	8:137450801-140550800	DEL	3100000	12	COL22A1,CTD-2534J5.1,FAM135B,RNU6-144P,RP11-238K6.1,RP11-238K6.2,RP11-30J20.1,RP11-324F11.1,RP11-398H6.1,RP11-431D12.1,RP11-489O18.1,SNORA25	COL22A1,FAM135B
MDAMB468	0.73	9:14860601-17924500	DEL	3063900	20	BNC2,C9orf92,CCDC171,CNTLN,FREM1,PSIP1,RN7SL157P,RN7SL720P,RN7SL98P,RNU6-14P,RNU6-246P,RNU6-319P,RNU6-559P,RP11-132E11.2,RP11-183I6.2,RP11-62F24.1,RP11-62F24.2,SH3GL2,SNAPC3,TTC39B	PSIP1
MDAMB468	0.73	10:25638301-28474500	DEL	2836200	42	ABI1,ACBD5,AL160291.1,ANKRD26,APBB1IP,ARMC4,GAD2,GPR158,LINC00202-1,LINC00202-2,LINC00264,LINC00614,MASTL,MKX,MPP7,MYO3A,PDSS1,PTCHD3,RAB18,RN7SKP132,RN7SKP220,RNA5SP306,RNA5SP307,RNU2-24P,RNU6-452P,RNU6-490P,RNU6-632P,RNU6-666P,RNU6-946P,RNU7-12P,RP11-128B16.3,RP11-218D6.4,RP11-360I20.2,RP11-435M3.2,RP11-748L13.6,RP11-85G18.6,RP13-16H11.2,RP13-16H11.5,RP13-16H11.7,SNORA57,YME1L1,snoU13	ABI1,MYO3A
MDAMB468	0.73	12:23022201-26189200	DEL	3167000	32	AC026310.1,AC087239.1,BCAT1,C12orf77,CASC1,IFLTD1,KRAS,LINC00477,LRMP,LYRM5,MIR920,RASSF8,RASSF8-AS1,RN7SKP262,RN7SL38P,RNU4-67P,RP11-114G22.1,RP11-153K16.1,RP11-153K16.2,RP11-437F6.1,RP11-443N24.2,RP11-443N24.3,RP11-443N24.4,RP11-444D3.1,RP11-625L16.1,RP11-625L16.3,RP11-662I13.2,RP11-685B13.2,RP11-713N11.4,RP11-713N11.5,RP11-778H2.1,SOX5	KRAS
MDAMB468	0.73	14:103968501-104755400	DEL	786900	37	AL049840.1,AL136001.1,AL139300.1,APOPT1,ASPG,BAG5,C14orf144,C14orf2,CKB,CTD-2134A5.3,CTD-2134A5.4,CTD-2223O18.1,KIF26A,KLC1,LINC00637,MARK3,MIR203,RD3L,RN7SL634P,RNU4-68P,RNU7-160P,RP11-260M19.2,RP11-600F24.7,RP11-73M18.10,RP11-73M18.2,RP11-73M18.6,RP11-73M18.7,RP11-73M18.8,RP11-73M18.9,RP11-894P9.1,RP11-894P9.2,SNORD51,TDRD9,TRMT61A,XRCC3,Y_RNA,ZFYVE21	TDRD9
MDAMB468	0.73	15:88058901-89484200	DEL	1425300	16	AC013489.1,ACAN,AEN,HAPLN3,ISG20,LINC00052,MIR1179,MIR7-2,MRPL46,NTRK3,NTRK3-AS1,RP11-343B18.2,RP11-648K4.2,RP11-97O12.2,RP11-97O12.6,RP11-97O12.7	NTRK3
MDAMB468	0.73	16:28862301-29393500	DEL	531200	21	ATP2A1,CD19,CTB-134H23.2,LAT,MIR4517,NFATC2IP,NPIPB11,RABEP2,RP11-22P6.2,RP11-22P6.3,RP11-264B17.2,RP11-264B17.4,RP11-264B17.5,RP11-426C22.4,RP11-426C22.5,RP11-426C22.6,SH2B1,SNORA43,SNX29P2,SPNS1,snoU13	CD19
MDAMB468	0.73	17:9784701-12353500	DEL	2568800	42	AC000003.1,AC000003.2,AC005284.1,AC005701.1,AC005725.1,ADPRM,CTC-297N7.1,CTC-297N7.10,CTC-297N7.11,CTC-297N7.5,CTC-297N7.7,CTC-297N7.8,CTC-297N7.9,DNAH9,GAS7,GLP2R,LINC00675,MAP2K4,MIR744,MYH1,MYH13,MYH2,MYH4,MYH8,PIRT,RCVRN,RN7SL601P,RNU11-2P,RNU6-1065P,RP11-1096G20.5,RP11-401O9.3,RP11-401O9.4,RP11-471L13.2,RP11-628O18.1,RP11-680C21.1,RP11-799N11.1,RP11-963H4.3,RP11-963H4.5,SCO1,SHISA6,TMEM220,Z…	GAS7,MAP2K4
MDAMB468	0.73	17:58964001-61188000	DEL	2224000	33	AC018628.1,BRIP1,C17orf82,EFCAB3,INTS2,MARCH10,MED13,METTL2A,MIR633,MRC2,NACA2,RN7SL448P,RN7SL800P,RNU6-446P,RNU7-52P,RP11-136H19.1,RP11-156L14.1,RP11-15K2.2,RP11-180P8.1,RP11-180P8.3,RP11-264B14.1,RP11-264B14.2,RP11-332H18.3,RP11-332H18.4,RP11-332H18.5,RP11-453A12.1,RP11-464D20.6,TANC2,TBX2,TBX4,TLK2,Y_RNA,snoU13	BRIP1,MED13
MDAMB468	0.73	18:39358701-41942400	DEL	2583700	8	CTC-782O7.1,LINC00907,PIK3C3,RIT2,RNA5SP454,RNA5SP455,RNU6-443P,SYT4	PIK3C3
MDAMB468	0.72	3:663301-4068700	DEL	3405400	18	AC024158.1,AC026188.1,AC087430.1,AC090044.1,AC090044.2,CNTN4,CNTN4-AS1,CNTN4-AS2,CNTN6,IL5RA,LRRN1,RN7SKP144,RN7SL120P,RP11-204C23.1,RP11-97C16.1,SNORA43,SUMF1,TRNT1	CNTN4
MDAMB468	0.72	3:85376801-89510300	DEL	4133500	23	C3orf38,CADM2,CADM2-AS1,CADM2-AS2,CGGBP1,CHMP2B,EPHA3,HTR1F,MIR4795,MIR5688,POU1F1,RN7SKP284,RNU6-1129P,RNU6-873P,RNU6ATAC6P,RP11-159G9.5,RP11-331K15.1,RP11-451B8.1,RP11-789F5.1,VGLL3,Y_RNA,ZNF654,snoZ40	CADM2,EPHA3,POU1F1
MDAMB468	0.72	3:180149601-182952500	DEL	2802900	32	ATP11B,CCDC39,CCDC39-AS1,DCUN1D1,DNAJC19,FXR1,LAMP3,MCCC1,MCCC1-AS1,MCF2L2,RN7SKP265,RN7SL229P,RN7SL703P,RNA5SP150,RNU6-486P,RNU6-4P,RP11-139K4.1,RP11-139K4.2,RP11-225N10.1,RP11-275H4.1,RP11-338L18.1,RP11-416O18.1,RP11-416O18.2,RP11-496B10.3,RP11-4B14.3,RP11-531F16.4,RP11-646E18.2,RP11-646E18.4,SOX2,SOX2-OT,TTC14,U8	DCUN1D1,SOX2
MDAMB468	0.72	4:19953301-21161100	DEL	1207800	5	KCNIP4,MIR218-1,RP11-362J17.1,SLIT2,SLIT2-IT1	SLIT2
MDAMB468	0.72	6:160073001-161033600	DEL	960600	18	ACAT2,AIRN,IGF2R,LPA,MAS1,MRPL18,RNU4ATAC18P,RP1-249F5.3,RP1-276N6.2,RP11-288H12.4,SLC22A1,SLC22A2,SLC22A3,SNORA20,SNORA29,SOD2,TCP1,WTAP	IGF2R,SLC22A1,SLC22A2
MDAMB468	0.72	6:168052801-170045100	DEL	1992300	29	AL009178.1,DACT2,FRMD1,KIF25,KIF25-AS1,MLLT4,MLLT4-AS1,RP1-125N5.2,RP1-137D17.1,RP1-137D17.2,RP1-39J2.1,RP11-351J23.1,RP11-351J23.2,RP11-417E7.1,RP11-417E7.2,RP11-503C24.1,RP11-503C24.2,RP11-503C24.3,RP11-503C24.4,RP11-503C24.6,RP3-470B24.5,RP3-495K2.1,RP3-495K2.2,RP3-495K2.3,SMOC2,THBS2,WDR27,XXyac-YX65C7_A.2,XXyac-YX65C7_A.3	MLLT4
MDAMB468	0.72	7:78863101-82946300	DEL	4083200	23	AC003988.1,AC004862.6,AC005008.2,AC005159.1,AC006145.1,AC008163.4,AC010091.1,CACNA2D1,CD36,GNAI1,GNAT3,HGF,MAGI2,MAGI2-AS3,MIR1255B1,PCLO,RN7SL35P,RN7SL869P,RNA5SP234,RNA5SP235,RNU6-530P,RNU6-849P,SEMA3C	CD36,HGF,MAGI2,PCLO
MDAMB468	0.72	7:154347173-157274800	DEL	2927628	46	AC005534.8,AC006372.4,AC006967.1,AC008060.5,AC008060.7,AC008060.8,AC009403.2,AC021218.2,AC073133.1,AC073133.2,AC099552.2,AC099552.3,AC104133.1,AC144652.1,BLACE,C7orf13,CNPY1,DNAJB6,DPP6,EN2,HTR5A,HTR5A-AS1,INSIG1,LINC01006,LMBR1,MNX1,MNX1-AS1,MNX1-AS2,NOM1,PAXIP1,PAXIP1-AS1,RBM33,RN7SKP280,RN7SL142P,RNF32,RNU4-31P,RP11-476H24.1,RP11-5C23.1,RP11-5C23.2,RP4-639J15.1,RP5-1121A15.3,RP5-1142J19.1,RP5-…	DPP6,MNX1,SHH
MDAMB468	0.72	8:92577101-94418900	DEL	1841800	21	AC016885.1,AC091096.1,AC117834.1,C8orf87,CTD-3239E11.2,GS1-5L10.1,LINC00535,RN7SKP231,RP11-100L22.1,RP11-100L22.2,RP11-100L22.3,RP11-100L22.4,RP11-122C21.1,RP11-388K12.1,RP11-388K12.2,RP11-587H10.1,RP11-587H10.2,RP11-700E23.1,RP11-700E23.2,RUNX1T1,TRIQK	RUNX1T1
MDAMB468	0.72	8:142809037-143583300	DEL	774264	8	AC104417.1,BAI1,CTD-3135A9.3,LINC00051,MIR4472-1,RP11-953B20.1,RP13-467H17.1,TSNARE1	BAI1
MDAMB468	0.72	9:103868001-110018300	DEL	6150300	51	ABCA1,AL391867.1,AL591377.1,ALDOB,BAAT,CYLC2,FKTN,FSD1L,GRIN3A,LINC00587,LPPR1,MRPL50,NIPSNAP3A,OR13C2,OR13C3,OR13C4,OR13C5,OR13C8,OR13C9,OR13D1,OR13F1,PPP3R2,RN7SKP191,RN7SKP77,RNA5SP291,RNA5SP292,RNF20,RNU6-329P,RP11-196I18.4,RP11-217B7.2,RP11-217B7.3,RP11-235C23.5,RP11-308N19.1,RP11-308N19.3,RP11-308N19.4,RP11-341A22.2,RP11-436F21.1,RP11-490D19.6,RP11-508N12.2,RP11-508N12.4,RP11-540H22.2,RP11-…	RNF20,SMC2,TAL2
MDAMB468	0.72	12:3614301-5227700	DEL	1613400	24	AKAP3,C12orf4,C12orf5,CCND2,CCND2-AS1,CCND2-AS2,DYRK4,FGF23,FGF6,GALNT8,KCNA1,KCNA5,KCNA6,PRMT8,RAD51AP1,RNU6-174P,RP11-234B24.2,RP11-234B24.4,RP11-320N7.2,RP11-429A20.3,RP11-429A20.4,RP11-500M8.4,RP11-664D1.1,RP3-377H17.2	AKAP3,CCND2,FGF23,FGF6
MDAMB468	0.72	12:78388301-79573600	DEL	1185300	9	NAV3,RP11-123M21.1,RP11-136F16.1,RP11-171L9.1,RP11-38F22.1,RP11-390N6.1,RP11-754N21.1,RP11-90C1.1,SYT1	NAV3
MDAMB468	0.72	14:38569201-45112500	DEL	6543300	37	AL138498.1,AL157791.1,AL161751.1,AL390335.1,AL445074.1,CLEC14A,CTAGE5,CTD-2058B24.2,CTD-2142D14.1,CTD-2298J14.2,CTD-2307P3.1,FBXO33,FSCB,GEMIN2,LINC00639,LRFN5,MIA2,PNN,RP11-111A21.1,RP11-129M6.1,RP11-163M18.1,RP11-214N1.1,RP11-305B6.3,RP11-313C4.1,RP11-407N17.3,RP11-407N17.4,RP11-407N17.5,RP11-545M17.1,RP11-662J14.1,RP11-662J14.2,RP11-96D24.1,RP11-99L13.1,RP11-99L13.2,SNORA31,SSTR1,Y_RNA,snoU13	SSTR1
MDAMB468	0.72	14:105261601-105419700	DEL	158100	8	AKT1,CEP170B,CTD-3051D23.1,CTD-3051D23.3,CTD-3051D23.4,LINC00638,PLD4,ZBTB42	AKT1
MDAMB468	0.72	16:29580001-30200100	DEL	620100	36	AC009133.12,AC009133.14,AC009133.15,AC009133.17,AC009133.20,AC009133.21,ALDOA,ASPHD1,C16orf54,CDIPT,CDIPT-AS1,CORO1A,CTD-2574D22.2,CTD-2574D22.4,DOC2A,FAM57B,HIRIP3,INO80E,KIF22,MAPK3,MAZ,MIR3680-2,MVP,PAGR1,PRRT2,QPRT,RN7SKP127,RP11-455F5.3,RP11-455F5.4,RP11-455F5.5,SEZ6L2,SPN,TAOK2,TBX6,TMEM219,ZG16	MAPK3
MDAMB468	0.72	17:50336501-54853700	DEL	4517200	20	AC011073.1,AC090079.1,AC102948.2,C17orf112,CTC-462L7.1,HLF,KIF2B,MMD,NOG,PCTP,RN7SKP14,RNU6-1249P,RP11-429O1.1,RP11-515E23.1,RP11-515E23.2,RP11-515O17.2,RP11-515O17.3,RP11-763E3.1,TMEM100,TOM1L1	HLF
MDAMB468	0.71	3:75757601-77813100	DEL	2055500	7	AC026877.1,MIR4273,RN7SL92P,RNU6-386P,ROBO2,Y_RNA,ZNF717	ROBO2
MDAMB468	0.71	3:79183601-81100500	DEL	1916900	6	AC117479.1,MIR3923,ROBO1,RP11-47P18.1,RP11-47P18.2,RP11-6B4.1	ROBO1
MDAMB468	0.71	4:68701-1428303	DEL	1359603	43	AC078852.1,AC078852.2,AC079140.1,AC092535.3,AC092574.1,AC092574.2,AC118278.1,AC139887.4,CPLX1,CRIPAK,CTBP1,CTBP1-AS2,DGKQ,FGFRL1,IDUA,MAEA,MIR571,MYL5,NKX1-1,PCGF3,PDE6B,PIGG,RN7SL358P,RP11-1191J2.2,RP11-1191J2.4,RP11-1191J2.5,RP11-1263C18.1,RP11-20I20.2,RP11-20I20.4,RP11-2H3.6,RP11-440L14.1,RP11-440L14.3,RP11-440L14.4,RP11-460I19.2,SLC26A1,SNORA48,SPON2,TMEM175,UVSSA,ZNF141,ZNF595,ZNF718,ZNF732	CRIPAK
MDAMB468	0.71	4:160667901-165274200	DEL	4606300	17	AC005150.1,AC093788.1,AC106860.1,FSTL5,MARCH1,NAF1,NPY1R,NPY5R,RN7SKP105,RP11-218F10.3,RP11-234O6.2,RP11-497K21.1,RP11-502M1.2,RP11-563E2.2,RP11-6C14.1,TKTL2,TMA16	FSTL5
MDAMB468	0.71	7:83750901-87333200	DEL	3582300	21	ABCB1,ABCB4,AC003984.1,AC005009.1,AC005009.2,AC005076.5,AC074183.4,AC092022.1,CROT,CTA-254O6.1,DMTF1,GRM3,KIAA1324L,LINC00972,RUNDC3B,SEMA3A,SEMA3D,TMEM243,TP53TG1,Y_RNA,snoU13	ABCB1,GRM3
MDAMB468	0.71	7:151986201-153695300	DEL	1709100	13	AC005631.1,AC073236.3,ACTR3B,AF104455.1,DPP6,LINC01003,RN7SL811P,RN7SL845P,RNA5SP250,SNORA26,XRCC2,Y_RNA,snoU13	DPP6
MDAMB468	0.71	7:153704501-154275764	DEL	571264	4	AC006019.3,AC006019.4,DPP6,RP5-1048B16.1	DPP6
MDAMB468	0.71	7:157941901-158127100	DEL	185200	1	PTPRN2	PTPRN2
MDAMB468	0.71	8:15438301-16530400	DEL	1092100	4	MSR1,RP11-13N12.2,RP11-77B22.2,TUSC3	TUSC3
MDAMB468	0.71	8:112168301-115867600	DEL	3699300	13	AC024996.1,AC107890.1,CSMD3,MIR2053,RNU4-37P,RP11-1101K5.1,RP11-114O8.1,RP11-267L5.1,RP11-58O3.2,RP11-67H2.1,RP11-946L20.4,Y_RNA,snoU13	CSMD3
MDAMB468	0.71	8:144958101-145337048	DEL	378948	15	AC104592.1,CTD-3065J16.6,CTD-3065J16.9,CYC1,EXOSC4,FAM203A,GRINA,KM-PA-2,MAF1,MIR661,OPLAH,PLEC,SCXB,SHARPIN,SPATC1	CYC1
MDAMB468	0.71	8:145427667-145781800	DEL	354134	27	AC084125.4,AC110280.1,ADCK5,ARHGAP39,BOP1,C8orf82,CTD-2517M22.16,CTD-2517M22.17,DGAT1,FAM203B,FOXH1,GPT,GS1-393G12.12,GS1-393G12.14,HSF1,KIFC2,LRRC14,LRRC24,MFSD3,MIR1234,MIR939,RECQL4,SCRT1,SCXA,SLC39A4,SLC52A2,VPS28	RECQL4
MDAMB468	0.71	9:120178101-122818800	DEL	2640700	13	BRINP1,RNU6-1082P,RP11-127L21.1,RP11-281A20.1,RP11-281A20.2,RP11-295D22.1,RP11-349E4.1,RP11-360A18.1,RP11-360A18.2,RP11-388N2.1,RP11-500B12.1,TLR4,snoZ13_snr52	TLR4
MDAMB468	0.71	10:128744761-133655300	DEL	4910540	31	AL355531.1,AL355531.2,AL450307.1,AL450307.2,AL607076.1,CLRN3,DOCK1,EBF3,FAM196A,FOXI2,GLRX3,LINC00959,MGMT,MIR378C,MIR4297,MKI67,NPS,PTPRE,RP11-109A6.2,RP11-109A6.3,RP11-168C9.1,RP11-223P11.2,RP11-223P11.3,RP11-264E18.1,RP11-442O18.1,RP11-442O18.2,RP11-4C20.3,RP11-4C20.4,RP11-540N6.1,TCERG1L-AS1,Y_RNA	MGMT,MKI67
MDAMB468	0.71	11:196801-436900	DEL	240100	21	BET1L,IFITM1,IFITM2,IFITM3,IFITM5,NLRP6,ODF3,PKP3,PSMD13,RIC8A,RP11-304M2.5,RP11-326C3.10,RP11-326C3.11,RP11-326C3.12,RP11-326C3.13,RP11-326C3.14,RP11-326C3.15,RP11-326C3.2,RP11-326C3.7,SIGIRR,SIRT3	SIRT3
MDAMB468	0.71	11:1198747-2960000	DEL	1761254	61	AC051649.1,AC051649.12,AC051649.6,AC068580.1,AC068580.5,AC068580.6,AC068580.7,AC124057.5,AC132217.4,AC136297.1,AP006285.6,AP006285.7,ASCL2,BRSK2,C11orf21,C11orf89,CD81,CD81-AS1,CDKN1C,CTSD,DUSP8,FAM99A,FAM99B,H19,IGF2,IGF2-AS,INS,KCNQ1,KCNQ1-AS1,KCNQ1DN,KCNQ1OT1,KRTAP5-1,KRTAP5-2,KRTAP5-3,KRTAP5-4,KRTAP5-5,KRTAP5-6,KRTAP5-AS1,LINC01150,LSP1,MIR4298,MIR4686,MIR483,MRPL23,MRPL23-AS1,MUC5AC,PHLDA2,R…	CDKN1C,IGF2
MDAMB468	0.71	11:20031701-24350400	DEL	4318700	33	AC100767.1,AC103801.2,ANO5,CCDC179,CTD-2019O4.1,CTD-2140G10.1,CTD-2140G10.2,CTD-2140G10.4,CTD-3064C13.1,DBX1,FANCF,GAS2,HTATIP2,NAV2,NAV2-AS1,NAV2-AS2,NELL1,PRMT3,RNA5SP336,RNA5SP337,RNA5SP338,RNU6-783P,RP11-17A1.3,RP11-266A24.1,RP11-2F20.1,RP11-34N19.1,RP11-670N15.1,RP11-701I24.3,RP11-945A11.1,RP11-945A11.2,SLC17A6,SLC6A5,SVIP	FANCF
MDAMB468	0.71	12:16358401-22187100	DEL	5828700	45	ABCC9,AC007528.1,AC087237.1,AEBP2,C12orf39,CAPZA3,CTC-465D4.1,GOLT1B,GYS2,IAPP,KCNJ8,LMO3,LST3,MGST1,PDE3A,PIK3C2G,PLCZ1,PLEKHA5,RECQL,RERGL,RN7SL459P,RN7SL67P,RNU1-146P,RNU6-254P,RNU6-837P,RP11-239A17.1,RP11-282K24.3,RP11-284H19.1,RP11-361I14.2,RP11-405A12.2,RP11-424M22.3,RP11-59N23.1,RP11-59N23.3,RP11-606D9.1,RP11-664H17.1,RP11-69C13.1,RP11-729I10.2,RP11-871F6.3,SLC15A5,SLCO1A2,SLCO1B1,SLCO1B3,…	SLCO1B1
MDAMB468	0.71	12:77633301-78387800	DEL	754500	5	AC073528.1,NAV3,RP1-34H18.1,RP1-97G4.1,RP11-781A6.1	NAV3
MDAMB468	0.7	1:3435801-3848216	DEL	412416	19	AL691523.1,C1orf174,CCDC27,CEP104,DFFB,LINC01134,LRRC47,MEGF6,MIR551A,RN7SL574P,RP1-286D6.5,RP11-46F15.2,RP5-1092A11.2,RP5-1092A11.5,SMIM1,TP73,TP73-AS1,TPRG1L,WRAP73	TP73
MDAMB468	0.7	1:17236401-21104000	DEL	3867600	80	AC004824.1,AC004824.2,ACTL8,AKR7A2,AKR7A3,AL137127.1,ALDH4A1,ARHGEF10L,ATP13A2,CAMK2N1,CAPZB,CDA,CROCC,DDOST,EMC1,FAM43B,HP1BP3,HTR6,IFFO2,IGSF21,KIF17,KLHDC7A,LINC01141,MFAP2,MINOS1,MINOS1-NBL1,MIR1290,MIR3972,MIR4695,MRTO4,MUL1,NBL1,OTUD3,PADI1,PADI2,PADI3,PADI4,PADI6,PAX7,PINK1,PLA2G2A,PLA2G2C,PLA2G2D,PLA2G2E,PLA2G2F,PLA2G5,PQLC2,RCC2,RN7SL277P,RN7SL304P,RN7SL85P,RNF186,RNU4-28P,RNU6-1099P,RP1…	CDA,PAX7,SDHB
MDAMB468	0.7	3:83855101-85370200	DEL	1515100	6	AC107025.1,AC108696.1,AC132660.1,CADM2,LINC00971,RP11-735B13.2	CADM2
MDAMB468	0.7	4:43447101-48055000	DEL	4607900	34	AC092597.3,AC107068.1,AC131951.1,ATP10D,CNGA1,COMMD8,CORIN,COX7B2,GABRA2,GABRA4,GABRB1,GABRG1,GNPDA2,GUF1,KCTD8,NIPAL1,RN7SKP199,RN7SKP215,RN7SL193P,RN7SL691P,RNU6-412P,RNU6-931P,RP11-121C2.2,RP11-320H14.1,RP11-324J13.2,RP11-328N19.1,RP11-362I1.1,RP11-436F23.1,RP11-663P9.1,RP11-700J17.1,RP11-700J17.2,RP11-731J8.2,YIPF7,snoU13	GABRG1
MDAMB468	0.7	4:182162701-184198400	DEL	2035700	21	AC108142.1,AC114798.1,MIR1305,RN7SKP13,RN7SKP67,RNU2-34P,RNU7-158P,RP11-188P17.2,RP11-18D7.2,RP11-18D7.3,RP11-335L23.4,RP11-335L23.5,RP11-402C9.1,RP11-540E16.2,RP11-665C14.2,TENM3,U3,WWC2,WWC2-AS1,WWC2-AS2,snoU13	TENM3
MDAMB468	0.7	6:170327237-170922000	DEL	594764	13	DLL1,FAM120B,MIR4644,PDCD2,PSMB1,RP1-140C12.2,RP11-302L19.1,RP11-302L19.3,RP5-1086L22.1,RP5-894D12.3,RP5-894D12.4,RP5-894D12.5,TBP	DLL1,PSMB1
MDAMB468	0.7	7:65757601-69662400	DEL	3904800	38	AC006480.1,AC008267.1,AC069280.1,AC073089.1,AUTS2,GS1-124K5.11,GS1-124K5.3,GS1-124K5.4,KCTD7,LINC00174,MIR4650-1,RN7SL371P,RN7SL43P,RNA5SP231,RNU6-1254P,RNU6-229P,RNU6-313P,RNU6-832P,RNU6-96P,RP11-123O1.1,RP11-166O4.5,RP11-166O4.6,RP11-358M3.1,RP11-3P22.1,RP11-3P22.2,RP11-458F8.4,RP11-792A8.4,RP4-736H5.3,RP4-756H11.3,RP5-942I16.1,RP5-945F2.2,RP5-945F2.3,SBDS,TMEM248,TPST1,TYW1,Y_RNA,snoU13	SBDS
MDAMB468	0.7	7:157414101-157939600	DEL	525500	5	AC006003.3,AC011899.10,AC011899.9,PTPRN2,RP11-452C13.1	PTPRN2
MDAMB468	0.7	14:81585701-86353700	DEL	4768000	27	CTD-2128A3.2,CTD-2128A3.3,FLRT2,GTF2A1,LINC00911,RNU3P3,RNU6-976P,RNU6ATAC28P,RNU7-51P,RP11-114N19.3,RP11-11K13.1,RP11-226P1.2,RP11-299L17.3,RP11-353P15.1,RP11-406A9.2,RP11-452D21.1,RP11-452D21.2,RP11-497E19.1,RP11-497E19.2,RP11-666E17.1,RP11-789A21.1,RP11-799P8.1,SEL1L,SNORA79,STON2,TSHR,snoU13	TSHR
MDAMB468	0.7	16:61891401-66322700	DEL	4431300	24	AC009110.1,AC010546.1,AC012322.1,CDH11,CDH8,CTC-420A11.2,LINC00922,RNU6-21P,RP11-21L1.1,RP11-256I9.2,RP11-256I9.3,RP11-2K6.2,RP11-351A20.1,RP11-351A20.2,RP11-368L12.1,RP11-370P15.2,RP11-439I14.2,RP11-467L24.1,RP11-513N24.1,RP11-744D14.2,RP11-95H3.1,RP11-96H17.1,RP11-96H17.3,snoU13	CDH11
MDAMB468	0.7	18:25320801-27604400	DEL	2283600	9	AC015933.2,AC090349.1,AC091321.1,AC105245.1,CDH2,CTD-2515C13.2,RNU6-408P,RP11-510D21.1,RP11-784B15.1	CDH2
MDAMB468	0.7	19:7060801-7347360	DEL	286560	5	AC010311.1,AC125387.1,CTB-25J19.9,INSR,ZNF557	INSR
MDAMB468	0.7	19:7383181-8690610	DEL	1307430	60	AC010323.1,AC010336.1,AC092316.1,AC092316.2,AC130469.2,ADAMTS10,ANGPTL4,ARHGEF18,C19orf45,C19orf59,CAMSAP3,CCL25,CD209,CERS4,CLEC4G,CLEC4M,CTB-133G6.1,CTB-133G6.2,CTD-2207O23.11,CTD-2207O23.3,CTD-2325M2.1,CTD-3020H12.4,CTD-3193O13.1,CTD-3193O13.11,CTD-3193O13.13,CTD-3193O13.14,CTD-3193O13.8,CTD-3193O13.9,CTD-3214H19.16,CTD-3214H19.6,CTXN1,ELAVL1,EVI5L,FBN3,FCER2,HNRNPM,KANK3,LRRC8E,MAP2K7,MARCH2,…	MAP2K7
MDAMB468	0.69	1:5736301-12693700	DEL	6957400	99	ACOT7,AL035406.1,AL356261.1,AL356693.1,C1orf200,CA6,CAMTA1,CAMTA1-IT1,CHD5,CLSTN1,CTNNBIP1,DNAJC11,ENO1,ENO1-AS1,ENO1-IT1,ERRFI1,ESPN,GPR153,GPR157,H6PD,HES2,HES3,ICMT,KCNAB2,KIF1B,KLHL21,LINC00337,LZIC,MIR1273D,MIR34A,MIR4252,MIR4689,MIR5697,NMNAT1,NOL9,PARK7,PER3,PGD,PHF13,PIK3CD,RERE,RN7SKP269,RN7SL451P,RN7SL721P,RN7SL729P,RN7SL731P,RNA5SP40,RNU1-7P,RNU1-8P,RNU6-304P,RNU6-37P,RNU6-731P,RNU6-82…	CAMTA1,ERRFI1,PIK3CD,RPL22
MDAMB468	0.69	1:14121701-16832400	DEL	2710700	54	AGMAT,AL121992.1,ARHGEF19,ARHGEF19-AS1,C1orf134,C1orf195,C1orf64,CASP9,CELA2A,CELA2B,CLCNKA,CLCNKB,CTRC,DDI2,DNAJC16,EFHD2,EPHA2,FAM131C,FBLIM1,FBXO42,FHAD1,HSPB7,NECAP2,PLEKHM2,PRDM2,RNU6-1265P,RNU7-179P,RP11-169K16.4,RP11-169K16.9,RP11-276H7.2,RP11-276H7.3,RP11-288I21.1,RP11-344F13.1,RP11-5P18.5,RP3-467K16.2,RP3-467K16.4,RP3-467K16.7,RP4-680D5.2,RP4-680D5.8,RP4-680D5.9,RP4-704D23.1,RP4-798A10.2…	PRDM2,SPEN
MDAMB468	0.69	1:27047201-28860300	DEL	1813100	65	AHDC1,AL109927.1,AL353354.1,AL353354.2,ARID1A,ATPIF1,C1orf172,CD164L2,DNAJC8,EYA3,FAM46B,FAM76A,FCN3,FGR,GPATCH3,GPN2,GPR3,IFI6,MAP3K6,MED18,NR0B2,NUDC,PHACTR4,PIGV,PPP1R8,PTAFR,RCC1,RN7SL165P,RN7SL501P,RN7SL559P,RNU6-1245P,RNU6-176P,RNU6-424P,RNU6-48P,RNU6-949P,RNU6ATAC27P,RNU7-29P,RP1-159A19.4,RP1-50O24.6,RP11-288L9.1,RP11-288L9.4,RP11-40H20.4,RP11-460I13.2,RP3-426I6.5,RP3-426I6.6,RP4-752I6.1,R…	ARID1A,MAP3K6
MDAMB468	0.69	3:89515301-89918500	DEL	403200	1	EPHA3	EPHA3
MDAMB468	0.69	4:65766301-68264300	DEL	2498000	10	EPHA5,MIR1269A,RNU2-40P,RNU6-699P,RP11-19C24.1,RP11-25H12.1,RP11-51P8.1,RP11-707A18.1,RP11-807H7.1,RP11-807H7.2	EPHA5
MDAMB468	0.69	4:179920001-182160200	DEL	2240200	3	LINC00290,RP11-404J23.1,RP11-460H9.1	LINC00290
MDAMB468	0.69	6:161067801-165717200	DEL	4649400	24	AGPAT4,AL035697.1,AL078585.1,C6orf118,CAHM,LPA,MAP3K4,PACRG,PARK2,PLG,RN7SL366P,RP1-155D22.1,RP1-155D22.2,RP1-230L10.1,RP1-257A15.1,RP1-81D8.3,RP11-235G24.1,RP11-235G24.3,RP11-300M24.1,RP11-347L18.1,RP3-428L16.1,RP3-428L16.2,RP5-826L7.1,snoU13	MAP3K4,PARK2
MDAMB468	0.69	8:2338001-3476700	DEL	1138700	7	AC133633.1,AC133633.2,CSMD1,GS1-57L11.1,RP11-134O21.1,RP11-279L11.1,RP11-378A12.1	CSMD1
MDAMB468	0.69	8:3477801-6063100	DEL	2585300	10	CSMD1,RN7SKP159,RN7SL318P,RN7SL872P,RNA5SP251,RP11-124B13.1,RP11-158A14.1,RP11-281H11.1,RP5-991O23.1,SNORA70	CSMD1
MDAMB468	0.69	9:7668401-12556800	DEL	4888400	19	AL353733.1,PTPRD,RN7SL5P,RNU2-47P,RNU7-185P,RP11-109M17.2,RP11-134K1.3,RP11-23D5.1,RP11-29B9.1,RP11-29B9.2,RP11-527D15.1,RP11-74C3.1,RP11-75C9.1,RP11-75C9.2,RP11-77E14.2,RP11-87N24.2,RP11-87N24.3,SNORD27,TMEM261	PTPRD
MDAMB468	0.69	16:80301-2493400	DEL	2413100	99	AC009041.2,AL022341.3,AL031721.1,ARHGDIG,BAIAP3,C16orf11,C16orf13,C16orf91,C1QTNF8,CACNA1H,CAPN15,CCDC78,CHTF18,CRAMP1L,DECR2,FAM195A,GNG13,GNPTG,HAGHL,HBA1,HBA2,HBM,HBQ1,HBZ,HN1L,IFT140,ITFG3,JMJD8,LA16c-306A4.1,LA16c-306A4.2,LA16c-312E8.2,LA16c-313D11.9,LA16c-316G12.2,LA16c-349E10.1,LA16c-358B7.3,LA16c-366D1.3,LA16c-366D3.1,LA16c-380A1.1,LA16c-381G6.1,LA16c-385E7.1,LA16c-390E6.3,LA16c-390E6.4,L…	IFT140,MAPK8IP3
MDAMB468	0.69	16:5805401-6169900	DEL	364500	4	AC012175.1,RBFOX1,RP11-420N3.2,RP11-509E10.1	RBFOX1
MDAMB468	0.68	4:59949901-62806300	DEL	2856400	11	AC095061.1,LPHN3,MIR548AG1,RNU6-1325P,RP11-16N2.1,RP11-525J21.1,RP11-593F5.2,RP11-622J8.1,RP11-725D20.1,RP11-798L4.1,Y_RNA	LPHN3
MDAMB468	0.68	4:62811301-63592700	DEL	781400	3	AC110810.1,LPHN3,RP11-84A1.3	LPHN3
MDAMB468	0.66	1:1590101-2585100	DEL	995000	45	AL589739.1,AL590822.1,AL590822.2,C1orf86,CALML6,CDK11A,CDK11B,FAM213B,GABRD,GNB1,HES5,MMEL1,MORN1,NADK,PANK4,PEX10,PLCH2,PRKCZ,RER1,RP1-140A9.1,RP1-283E3.8,RP11-181G12.2,RP11-181G12.4,RP11-345P4.10,RP11-345P4.7,RP11-547D24.1,RP11-547D24.3,RP13-436F16.1,RP3-395M20.12,RP3-395M20.2,RP3-395M20.3,RP3-395M20.7,RP3-395M20.8,RP3-395M20.9,RP4-713A8.1,RP4-740C4.6,RP4-740C4.7,RP4-740C4.8,RP4-740C4.9,RP5-892…	TNFRSF14
MDAMB468	0.66	1:49450901-49529600	DEL	78700	2	AGBL4,RP11-141A19.1	AGBL4
MDAMB468	0.64	1:185783714-185785297	DEL	1583	1	HMCN1	HMCN1
MDAMB468	0.63	16:6176601-8686900	DEL	2510300	18	AC018767.1,AC093515.1,CTD-2535I10.1,RBFOX1,RNU6-328P,RNU6-457P,RNU7-99P,RP11-26O3.1,RP11-279O17.1,RP11-279O17.2,RP11-279O17.3,RP11-420N3.2,RP11-468I15.1,RP11-483K5.3,RP11-568A19.1,SNORA40,TMEM114,snoMe28S-Am2634	RBFOX1
MDAMB468	0.61	X:14240701-15042400	DEL	801700	4	AC003658.1,FANCB,GLRA2,MOSPD2	FANCB
MDAMB468	0.61	X:50012133-52398976	DEL	2386844	24	AL121865.1,BMP15,CCNB3,CXorf67,DGKK,GSPT2,MAGED1,MAGED4,NUDT10,NUDT11,RNU6-504P,RNU6-935P,RP11-104D21.3,RP11-114H20.1,RP11-348F1.2,RP11-348F1.3,RP11-363G10.2,RP11-56H2.2,SHROOM4,SNORA11D,SNORA11E,XAGE1B,XAGE2,XAGE2B	MAGED1
MDAMB468	0.6	11:520101-694200	DEL	174100	12	CDHR5,DRD4,HRAS,IRF7,LRRC56,MIR210,MIR210HG,RASSF7,RP11-496I9.1,RP11-754B17.1,RP13-46H24.1,SCT	HRAS,IRF7
MDAMB468	0.59	X:31577501-33793900	DEL	2216400	7	DMD,DMD-AS3,MIR3915,MIR548F5,RNA5SP501,RP11-305F18.1,snoU13	DMD
MDAMB468	0.59	X:43944801-44898800	DEL	954000	8	AL136137.1,DUSP21,EFHC2,FUNDC1,KDM6A,RN7SL291P,RNU6-523P,Y_RNA	KDM6A
MDAMB468	0.57	X:1447401-1551600	DEL	104200	5	ASMTL,ASMTL-AS1,IL3RA,LINC00106,SLC25A6	ASMTL
MDAMB468	0.57	X:1651001-1787900	DEL	136900	3	AKAP17A,ASMT,P2RY8	P2RY8
MDAMB468	0.45	2:240288480-240288752	DEL	272	1	HDAC4	HDAC4
MDAMB468	0.44	13:46142201-49041000	DEL	2898800	32	CPB2,CPB2-AS1,ESD,FAM194B,HTR2A,HTR2A-AS1,ITM2B,KIAA0226L,LCP1,LINC00441,LINC00444,LINC00562,LINC00563,LINC01055,LPAR6,LRCH1,MED4,MED4-AS1,NUDT15,RN7SKP5,RN7SL288P,RN7SL700P,RNU2-6P,RNU6-68P,RP11-189B4.6,RP11-279N8.1,SIAH3,SPERT,SUCLA2,SUCLA2-AS1,ZC3H13,snoU13	LCP1
MDAMB468	0.43	10:87983356-87983499	DEL	143	1	GRID1	GRID1
MDAMB468	0.39	9:8640851-8641662	DEL	811	1	PTPRD	PTPRD
MDAMB468	0.35	3:71117151-71117484	DEL	333	1	FOXP1	FOXP1
MDAMB468	0.35	6:162030610-162031661	DEL	1051	1	PARK2	PARK2
MDAMB468	0.34	4:62908094-62909391	DEL	1297	1	LPHN3	LPHN3
MDAMB468	0.13	6:157479553-157481590	DEL	2037	1	ARID1B	ARID1B
MDAMB468	0	1:185766816-185767126	DEL	310	1	HMCN1	HMCN1
MDAMB468	0	4:106148650-106148758	DEL	108	1	TET2	TET2
MDAMB468	0	5:138132418-138148546	DEL	16128	1	CTNNA1	CTNNA1
MDAMB468	0	16:7077084-7351020	DEL	273936	1	RBFOX1	RBFOX1
MDAMB468	0	17:55490701-55491506	DEL	805	1	MSI2	MSI2
MDAMB468	0	18:48507573-48606342	DEL	98769	2	ELAC1,SMAD4	SMAD4
MDAMB468	0	X:32644436-32645660	DEL	1224	1	DMD	DMD

## Sheet: 5E
Table S5E: List of copy number alterations identified in the cell line models
SAMPLE	RatioToAverageCoverage	LOCATION	SVTYPE	SVLEN	NumofGenes	GENES	CandidateGene
MCF7	24.91	17:59840408-59931854	DUP	91446	1	BRIP1	BRIP1
MCF7	23.96	20:52048201-52484900	DUP	436700	10	AC005808.3,AC006076.1,AL354993.1,RNU7-14P,RP4-678D15.1,RP4-724E16.2,RP5-823G15.5,TSHZ2,Y_RNA,ZNF217	TSHZ2,ZNF217
MCF7	21.6	20:46057978-46166407	DUP	108429	3	NCOA3,RNU6-497P,RNU6-563P	NCOA3
MCF7	20.76	17:59191101-59863900	DUP	672800	10	BRIP1,C17orf82,NACA2,RP11-136H19.1,RP11-15K2.2,RP11-332H18.3,RP11-332H18.4,RP11-332H18.5,TBX2,TBX4	BRIP1
MCF7	15.31	17:57149048-57182668	DUP	33620	1	TRIM37	TRIM37
MCF7	14.7	17:58342630-58683663	DUP	341033	6	APPBP2,C17orf64,PPM1D,RP11-15E18.1,RP11-15E18.4,USP32	PPM1D
MCF7	13.18	20:45464001-46525600	DUP	1061600	19	AL021394.1,AL031666.1,AL031666.2,CTD-2653D5.1,EYA2,MIR3616,NCOA3,RN7SKP33,RN7SL243P,RNA5SP486,RNU6-497P,RNU6-563P,RNU7-173P,RP1-148H17.1,RP11-323C15.2,RP4-569M23.2,RP4-569M23.4,SULF2,ZMYND8	NCOA3
MCF7	11.21	17:58190301-59190900	DUP	1000600	19	AC079005.1,APPBP2,BCAS3,C17orf64,CA4,CTD-2319I12.4,CTD-2319I12.5,PPM1D,RN7SL448P,RN7SL606P,RNU6-623P,RP11-15E18.1,RP11-15E18.4,RP11-264B14.1,RP11-264B14.2,SCARNA20,USP32,Y_RNA,snoU13	PPM1D
MCF7	10.6	20:52181786-55855043	DUP	3673257	42	AC005220.3,AC005808.3,AC006076.1,AL117380.1,AL117380.2,AL121914.1,AL133232.1,AURKA,BCAS1,BMP7,CASS4,CBLN4,CYP24A1,DOK5,FAM209A,FAM209B,FAM210B,GCNT7,MC3R,MIR4756,PFDN4,RN7SL170P,RNA5SP487,RNU4ATAC7P,RNU6-1146P,RNU6-929P,RNU7-14P,RP11-380D15.3,RP11-560A15.3,RP11-560A15.4,RP4-724E16.2,RP4-813D12.2,RP4-813D12.3,RP5-1010E17.1,RP5-1010E17.2,RP5-843L14.1,RP5-897D18.1,RTFDC1,TFAP2C,U3,ZNF217,snoU13	AURKA,ZNF217
MCF7	9.68	17:57647701-58189800	DUP	542100	20	AC005702.1,AC005702.2,AC005702.3,AC005702.4,CLTC,CTD-2319I12.1,CTD-2319I12.2,DHX40,HEATR6,MIR21,MIR4737,PTRH2,RNFT1,RNU6-450P,RP11-178C3.1,RP11-178C3.2,RP11-619I22.1,TBC1D3P1-DHX40P1,TUBD1,VMP1	CLTC
MCF7	6.86	20:45512916-56178434	DUP	10665518	100	ADNP,AL021394.1,AL031666.1,AL031666.2,AL034553.1,AL035106.1,AL035457.1,AL050316.1,AL079339.1,AL118525.1,AL133228.1,ARFGEF2,ATP9A,B4GALT5,BCAS4,CEBPB,CSE1L,CTD-2653D5.1,DDX27,DPM1,EYA2,FAM65C,KCNB1,KCNG1,LINC00494,MIR1302-5,MIR3194,MIR3616,MIR645,MOCS3,NCOA3,NFATC2,PARD6B,PTGIS,PTPN1,RN7SKP184,RN7SL197P,RN7SL243P,RN7SL603P,RN7SL636P,RN7SL672P,RNA5SP486,RNF114,RNU6-147P,RNU6-347P,RNU6-497P,RNU6-563…	ADNP,NCOA3,TSHZ2
MCF7	5	20:42224059-47966521	DUP	5742462	100	ACOT8,ADA,AL031663.1,AL031663.2,AL132772.1,C20orf62,CD40,CDH22,DBNDD2,DNTTIP1,ELMO2,EPPIN,EPPIN-WFDC6,FITM2,GDAP1L1,GTSF1L,HNF4A,HNF4A-AS1,IFT52,JPH2,KCNK15,KCNS1,MATN4,MIR3617,MIR3646,MMP9,MYBL2,NCOA5,NEURL2,OCSTAMP,OSER1,OSER1-AS1,PABPC1L,PCIF1,PI3,PIGT,PKIG,PLTP,R3HDML,RBPJL,RIMS4,RN7SL31P,RN7SL443P,RNA5SP485,RNU6-639P,RNU6ATAC38P,RP1-28H20.3,RP11-445H22.3,RP11-445H22.4,RP11-465L10.10,RP3-337O…	ADA,YWHAB
MCF7	4.97	17:55689901-57647000	DUP	1957100	60	AC023992.1,AC099850.1,AC100832.1,BZRAP1-AS1,C17orf47,CCDC182,CTD-2510F5.4,CTD-2510F5.6,CUEDC1,DHX40,DYNLL2,EPX,HSF5,LPO,MIR142,MIR301A,MIR454,MIR4729,MIR4736,MKS1,MPO,MRPS23,MSI2,MTMR4,OR4D1,OR4D2,PPM1E,PRR11,RAD51C,RN7SKP94,RN7SL449P,RN7SL716P,RNF43,RNU1-108P,RNU1-52P,RNU1-60P,RNU1-85P,RNU2-58P,RNU4-13P,RNU6-518P,RNU7-134P,RP11-112H10.4,RP11-159D12.10,RP11-159D12.2,RP11-159D12.5,RP11-343K8.3,RP1…	MIR142,MSI2,RAD51C,RNF43,TRIM37,VEZF1
MCF7	4.95	20:54856801-55766800	DUP	910000	23	AL117380.1,AL117380.2,AL121914.1,AL133232.1,AURKA,BMP7,CASS4,FAM209A,FAM209B,FAM210B,GCNT7,RN7SL170P,RNU6-1146P,RNU6-929P,RP11-380D15.3,RP11-560A15.3,RP11-560A15.4,RP5-843L14.1,RP5-897D18.1,RTFDC1,TFAP2C,U3,snoU13	AURKA
MCF7	4.91	20:49300625-52423026	DUP	3122401	42	AC005808.3,AC006076.1,ADNP,AL034553.1,AL035457.1,AL050316.1,AL079339.1,AL133228.1,AL354993.1,ATP9A,BCAS4,DPM1,FAM65C,KCNG1,MIR3194,MOCS3,NFATC2,PARD6B,RN7SKP184,RN7SL603P,RNU6-347P,RNU7-14P,RNU7-6P,RP11-15M15.1,RP11-15M15.2,RP11-80K6.2,RP4-583K8.1,RP4-669H2.1,RP4-678D15.1,RP4-715N11.2,RP4-723E3.1,RP4-724E16.2,RP5-1022J11.2,RP5-1112F19.2,RP5-823G15.5,RP5-914P20.5,RP5-955M13.4,SALL4,TSHZ2,Y_RNA,ZFP…	ADNP,TSHZ2,ZNF217
MCF7	4.68	20:42196776-48632473	DUP	6435697	100	ACOT8,ADA,AL031663.1,AL031663.2,AL132772.1,C20orf62,CD40,CDH22,DBNDD2,DNTTIP1,ELMO2,EPPIN,EPPIN-WFDC6,FITM2,GDAP1L1,GTSF1L,HNF4A,HNF4A-AS1,IFT52,JPH2,KCNK15,KCNS1,MATN4,MIR3617,MIR3646,MMP9,MYBL2,NCOA5,NEURL2,OCSTAMP,OSER1,OSER1-AS1,PABPC1L,PCIF1,PI3,PIGT,PKIG,PLTP,R3HDML,RBPJL,RIMS4,RN7SL31P,RN7SL443P,RNA5SP485,RNU6-639P,RNU6ATAC38P,RP11-445H22.3,RP11-445H22.4,RP11-465L10.10,RP3-337O18.9,RP3-461…	ADA,YWHAB
MCF7	4.48	20:46569775-49844594	DUP	3274819	63	ADNP,AL034553.1,AL035106.1,AL035457.1,AL118525.1,AL133228.1,ARFGEF2,B4GALT5,BCAS4,CEBPB,CSE1L,DDX27,DPM1,FAM65C,KCNB1,KCNG1,LINC00494,MIR1302-5,MIR645,MOCS3,PARD6B,PTGIS,PTPN1,RN7SL197P,RN7SL636P,RN7SL672P,RNF114,RNU6-147P,RNU6-919P,RNU7-144P,RNU7-72P,RP1-155G6.4,RP1-66N13.1,RP11-112L6.2,RP11-112L6.3,RP11-112L6.4,RP11-290F20.1,RP11-290F20.2,RP11-290F20.3,RP11-347D21.1,RP11-347D21.2,RP11-347D21.3,…	ADNP
MCF7	4.32	20:40869943-47925480	DUP	7055537	99	ACOT8,ADA,AL031663.1,AL031663.2,AL132772.1,C20orf62,DBNDD2,DNTTIP1,EPPIN,EPPIN-WFDC6,FITM2,GDAP1L1,GTSF1L,HNF4A,HNF4A-AS1,IFT52,JPH2,KCNK15,KCNS1,L3MBTL1,MATN4,MIR3617,MIR3646,MMP9,MYBL2,NEURL2,OSER1,OSER1-AS1,PABPC1L,PCIF1,PI3,PIGT,PKIG,PLTP,PTPRT,R3HDML,RBPJL,RIMS4,RN7SKP100,RN7SL31P,RN7SL443P,RN7SL666P,RNA5SP485,RNU6-1251P,RNU6-639P,RNU6-743P,RNU6ATAC38P,RP1-138B7.5,RP1-232N11.2,RP1-269M15.3,R…	ADA,YWHAB
MCF7	4.23	20:46555489-50657917	DUP	4102428	72	ADNP,AL034553.1,AL035106.1,AL035457.1,AL079339.1,AL118525.1,AL133228.1,ARFGEF2,ATP9A,B4GALT5,BCAS4,CEBPB,CSE1L,DDX27,DPM1,FAM65C,KCNB1,KCNG1,LINC00494,MIR1302-5,MIR3194,MIR645,MOCS3,NFATC2,PARD6B,PTGIS,PTPN1,RN7SL197P,RN7SL603P,RN7SL636P,RN7SL672P,RNF114,RNU6-147P,RNU6-347P,RNU6-919P,RNU7-144P,RNU7-6P,RNU7-72P,RP1-155G6.4,RP1-66N13.1,RP11-112L6.2,RP11-112L6.3,RP11-112L6.4,RP11-290F20.1,RP11-290F2…	ADNP
MCF7	4.1	17:59864801-61817000	DUP	1952200	36	AC015923.1,AC018628.1,AC037445.1,ACE,BRIP1,CYB561,DCAF7,EFCAB3,INTS2,KCNH6,LIMD2,MAP3K3,MARCH10,MED13,METTL2A,MIR633,MRC2,RN7SL800P,RNU6-288P,RNU6-446P,RNU7-52P,RP11-156L14.1,RP11-180P8.1,RP11-180P8.3,RP11-269G24.2,RP11-269G24.3,RP11-269G24.4,RP11-269G24.6,RP11-453A12.1,RP11-464D20.6,RP11-556O9.2,STRADA,TACO1,TANC2,TLK2,Y_RNA	BRIP1,MAP3K3,MED13,STRADA
MCF7	3.98	1:114184101-118456800	DUP	4272700	69	AL136376.1,AL157902.3,AL157904.1,AL355794.1,AL512638.1,AMPD1,AP4B1,AP4B1-AS1,ATP1A1,ATP1A1OS,BCAS2,C1orf137,CASQ2,CD101,CD2,CD58,CSDE1,DCLRE1B,DENND2C,FAM46C,GDAP2,HIPK1,IGSF3,MAB21L3,MAGI3,MAN1A2,MIR320B1,MIR548AC,MIR942,NGF,NHLH2,NRAS,OLFML3,PHTF1,PTGFRN,PTPN22,RN7SL420P,RN7SL432P,RNA5SP55,RNU6-817P,RP11-12L8.1,RP11-159M11.2,RP11-188D8.1,RP11-27K13.3,RP11-39H13.1,RP4-543J13.1,RP4-655J12.4,RP4-6…	CD58,FAM46C,NRAS,TRIM33
MCF7	3.86	20:39729438-39782017	DUP	52579	3	PLCG1,RP1-1J6.2,TOP1	PLCG1,TOP1
MCF7	3.76	20:48396701-49844900	DUP	1448200	39	ADNP,AL034553.1,AL035457.1,AL133228.1,BCAS4,CEBPB,DPM1,FAM65C,KCNG1,MIR1302-5,MIR645,MOCS3,PARD6B,PTPN1,RN7SL636P,RN7SL672P,RNF114,RNU6-147P,RNU6-919P,RNU7-72P,RP11-112L6.2,RP11-112L6.3,RP11-112L6.4,RP11-290F20.1,RP11-290F20.2,RP11-290F20.3,RP4-530I15.6,RP4-530I15.9,RP5-914P20.5,RP5-955M13.4,SLC9A8,SNAI1,SPATA2,TMEM189,TMEM189-UBE2V1,TRERNA1,UBE2V1,Y_RNA,snoU13	ADNP
MCF7	3.58	1:116871536-117131088	DUP	259552	11	AL136376.1,ATP1A1,ATP1A1OS,CD58,IGSF3,MIR548AC,RNU6-817P,RP4-655J12.4,RP4-655J12.5,RP5-1086K13.1,Y_RNA	CD58
MCF7	3.55	20:39643218-39706574	DUP	63356	2	RNU2-52P,TOP1	TOP1
MCF7	3.44	1:144810801-145832300	DUP	1021500	35	AL138796.1,AL590452.1,ANKRD34A,ANKRD35,CD160,GPR89A,HFE2,ITGA10,LIX1L,NBPF10,NBPF9,NOTCH2NL,NUDT17,PDE4DIP,PDZK1,PEX11B,PIAS3,POLR3C,POLR3GL,RN7SKP88,RNF115,RNU2-38P,RNU6-1071P,RNVU1-6,RP11-315I20.1,RP11-315I20.3,RP11-326G21.1,RP11-458D21.1,RP11-458D21.6,RP4-791M13.3,RP4-791M13.4,RP4-791M13.5,SEC22B,TXNIP,WI2-925H4.1	PDE4DIP
MCF7	3.31	20:39500101-39824900	DUP	324800	6	PLCG1,RNU2-52P,RP1-1J6.2,RP3-511B24.6,TOP1,ZHX3	PLCG1,TOP1
MCF7	3.03	20:39517055-41229512	DUP	1712457	16	CHD6,EMILIN3,LPIN3,PLCG1,PTPRT,RN7SL615P,RNU2-52P,RNU6-1018P,RP1-1J6.2,RP3-511B24.6,RP5-1121H13.3,RP5-1121H13.4,SNORA26,TOP1,Y_RNA,ZHX3	CHD6,PLCG1,TOP1
MCF7	2.8	1:120260501-120697100	DUP	436600	9	ADAM30,HMGCS2,NOTCH2,PHGDH,REG4,RNU6-465P,RP11-114O18.1,RP5-1042I8.7,RP6-42F4.1	NOTCH2,PHGDH,REG4
MCF7	2.63	8:128330101-129375300	DUP	1045200	13	CASC11,CASC8,MIR1205,MIR1207,MIR1208,MYC,POU5F1B,PVT1,RN7SKP226,RNU1-106P,RNU4-25P,RP11-382A18.2,TMEM75	MYC
MCF7	2.63	20:57268201-57466500	DUP	198300	10	GNAS,GNAS-AS1,MIR296,MIR298,NPEPL1,RP1-309F20.3,RP1-309F20.4,RP11-261P9.4,RP4-806M20.3,RP4-806M20.5	GNAS
MCF7	2.62	8:90827101-91006400	DUP	179300	3	NBN,OSGIN2,RNU6-925P	NBN
MCF7	2.59	14:38032068-38066862	DUP	34794	4	FOXA1,RP11-356O9.1,RP11-356O9.2,TTC6	FOXA1
MCF7	2.58	15:50379701-53199200	DUP	2819500	60	AC020892.1,ARPP19,ATP8B4,BCL2L10,CTD-2184D3.3,CTD-2184D3.5,CTD-2184D3.6,CTD-2184D3.7,CTD-2308G16.1,CTD-2650P22.1,CTD-3110H11.1,CYP19A1,DMXL2,GABPB1,GABPB1-AS1,GLDN,GNB5,LEO1,LYSMD2,MAPK6,MIR1266,MIR4712,MIR4713,MYO5A,MYO5C,ONECUT1,RN7SL354P,RN7SL494P,RNA5SP395,RP11-108K3.1,RP11-108K3.2,RP11-108K3.3,RP11-108K3.4,RP11-120K9.2,RP11-209K10.2,RP11-23N2.4,RP11-313P18.1,RP11-313P18.2,RP11-394B5.2,RP11-4…	CYP19A1
MCF7	2.57	17:61817601-62410800	DUP	593200	22	C17orf72,CCDC47,CD79B,CSH1,CSH2,CSHL1,CTC-264K15.6,DDX42,ERN1,FTSJ3,GH1,GH2,ICAM2,PSMC5,RN7SL805P,RP11-214C8.2,SCN4A,SMARCD2,SNORA76,SNORD104,STRADA,TEX2	CD79B,STRADA
MCF7	2.34	8:124002701-124867800	DUP	865100	25	ANXA13,C8orf76,CTD-2552K11.2,DERL1,FAM83A,FAM83A-AS1,FAM91A1,FBXO32,FER1L6,KLHL38,MIR4663,MIR548D1,RN7SKP155,RNU6-628P,RNU6-875P,RNY4P5,RP11-174I12.2,RP11-539E17.5,RP11-557C18.3,TBC1D31,U3,WDYHV1,ZHX1,ZHX1-C8ORF76,snoU13	FAM83A
MCF7	2.29	8:123604401-124001800	DUP	397400	9	AC016405.2,LINC01151,RP11-44N11.1,RP11-44N11.2,RP11-44N11.3,RP11-557C18.4,RP11-973F15.2,ZHX2,snoU13	ZHX2
MCF7	2.25	3:197187201-197659500	DUP	472300	12	AC024560.2,AC055764.1,AC128709.2,BDH1,FYTTD1,IQCG,KIAA0226,MIR922,RNU6-858P,RP11-496H1.2,RP11-803P9.1,RP13-616I3.1	BDH1
MCF7	2.24	8:101128001-102816500	DUP	1688500	39	ANKRD46,AP001205.1,FBXO43,GRHL2,KB-1083B1.1,KB-1107E3.1,KB-1410C5.2,KB-1410C5.3,KB-1410C5.5,KB-1460A1.1,KB-1460A1.3,KB-1460A1.5,KB-1562D12.1,KB-1615E4.2,KB-1615E4.3,KB-173C10.1,KB-173C10.2,KB-1930G5.3,KB-1930G5.4,KB-1991G8.1,MIR4471,NCALD,PABPC1,POLR2K,RN7SKP249,RN7SL563P,RN7SL685P,RNF19A,RNU4-83P,RNU6-1092P,RNU6ATAC41P,RNU7-67P,RP11-302J23.1,RP11-521I2.3,SNX31,SPAG1,YWHAZ,Y_RNA,ZNF706	SNX31,YWHAZ
MCF7	2.23	20:57467001-58876000	DUP	1409000	21	AL035250.1,ATP5E,C20orf197,CDH26,CTSZ,EDN3,FAM217B,GNAS,NELFCD,PHACTR3,PPP1R3D,RNU7-141P,RP11-164D18.2,RP4-614C15.2,RP4-614C15.3,RP4-719C8.1,RP5-1043L13.1,SLMO2,SYCP2,TUBB1,ZNF831	GNAS
MCF7	2.22	3:196056901-197186300	DUP	1129400	34	AC127904.2,AC128709.2,AC128709.3,AC128709.4,CEP19,CTD-2002J20.1,DLG1,DLG1-AS1,FBXO45,LINC01063,MFI2-AS1,MIR4797,NCBP2,NCBP2-AS1,NCBP2-AS2,NRROS,PAK2,PIGX,PIGZ,RN7SL434P,RN7SL738P,RNF168,RNU6-1279P,RNU6-42P,RNU6-646P,RNU6-910P,SENP5,SMCO1,TM4SF19,U4,UBXN7,UBXN7-AS1,WDR53,snoU13	PAK2
MCF7	2.21	8:105113401-105558900	DUP	445500	7	AP003471.2,AP003471.3,DCSTAMP,DPYS,LRP12,MIR548A3,RIMS2	RIMS2
MCF7	2.2	1:152244101-152442300	DUP	198200	5	CRNN,FLG,FLG-AS1,FLG2,RP1-91G5.3	FLG
MCF7	2.19	8:102817001-105113000	DUP	2296000	41	AP001572.1,AP003354.1,AP003356.1,AP003550.1,ATP6V1C1,AZIN1,BAALC,C8orf56,CTHRC1,DCAF13,FZD6,KB-1254G8.1,KB-1507C5.2,KB-1507C5.3,KB-1507C5.4,KB-1639H6.2,KB-1639H6.4,KB-1732A1.1,KB-1980E6.3,KB-431C1.4,KB-431C1.5,KLF10,MIR3151,MIR5680,NCALD,ODF1,RIMS2,RNU6-1011P,RNU6-1224P,RNU6ATAC8P,RP11-1C8.4,RP11-1C8.5,RP11-1C8.6,RP11-1C8.7,RP11-318M2.2,RP11-318M2.3,RRM2B,SLC25A32,UBR5,Y_RNA,snoU13	RIMS2,RRM2B
MCF7	2.17	3:195585001-196055900	DUP	470900	19	AC069257.8,AC124944.3,AC124944.5,LINC00885,PCYT1A,RN7SL773P,RNU2-11P,RNU7-18P,RP11-352G9.1,RP11-480A16.1,SLC51A,TCTEX1D2,TFRC,TM4SF19,TM4SF19-AS1,TNK2,TNK2-AS1,Y_RNA,ZDHHC19	TFRC,TNK2
MCF7	2.15	1:215623301-216203300	DUP	580000	4	KCTD3,RP5-1111A8.3,SNORD116,USH2A	USH2A
MCF7	2.07	1:150717201-152240100	DUP	1522900	73	AL450992.2,AL589765.1,AL589986.2,ANXA9,ARNT,BNIPL,C1orf56,C2CD4D,CDC42SE1,CELF3,CGN,CTSK,CTSS,FAM63A,FLG-AS1,GABPB2,HRNR,LINGO4,LYSMD1,MIR554,MLLT11,MRPL9,NBPF18P,OAZ3,PI4KB,PIP5K1A,POGZ,PRUNE,PSMB4,PSMD4,RFX5,RIIAD1,RN7SL444P,RNU6-1062P,RNU6-1309P,RNU6-662P,RNU6-884P,RNY4P25,RORC,RP11-107M16.2,RP11-126K1.2,RP11-126K1.6,RP11-126K1.8,RP11-126K1.9,RP11-316M1.12,RP11-316M1.3,RP11-404E16.1,RP11-68I18…	ARNT
MCF7	2.06	6:151884551-152045414	DUP	160863	3	CCDC170,ESR1,RNU6-813P	ESR1
MCF7	2.05	17:66069101-66571500	DUP	502400	12	AC079210.1,AC145343.2,AMZ2,ARSG,FAM20A,MIR635,PRKAR1A,RP11-120M18.2,RP11-120M18.5,RP11-147L13.2,RP11-147L13.8,SLC16A6	PRKAR1A
MCF7	2.02	20:52030101-52047100	DUP	17000	2	RP4-678D15.1,TSHZ2	TSHZ2
MCF7	2.01	11:118249302-118418478	DUP	169176	11	ATP5L,IFT46,KMT2A,RN7SL86P,RP11-770J1.3,RP11-770J1.4,RP11-770J1.5,RP11-770J1.7,TMEM25,TTC36,UBE4A	KMT2A
MCF7	2.01	11:118393325-118492491	DUP	99166	8	ARCN1,IFT46,KMT2A,PHLDB1,RNU6-1157P,RP11-770J1.3,TMEM25,TTC36	KMT2A
MCF7	2.01	14:38061534-38184715	DUP	123181	2	FOXA1,TTC6	FOXA1
MCF7	1.99	8:95568801-96565200	DUP	996400	21	C8orf37,CCNE2,DPY19L4,ESRP1,INTS8,KB-1047C11.1,KB-1047C11.2,KB-1608C10.2,MIR3150A,NDUFAF6,PLEKHF2,RNU6-1209P,RP11-22C11.2,RP11-267M23.4,RP11-320N21.2,RP11-347C18.3,RP11-347C18.5,RP11-90D11.1,TP53INP1,Y_RNA,snoU13	TP53INP1
MCF7	1.99	8:108564301-110395100	DUP	1830800	11	EMC2,NUDCD1,PKHD1L1,RNA5SP275,RP11-1084E5.1,RP11-122A21.2,RP11-35G22.1,RP11-790J24.1,RSPO2,TMEM74,TRHR	PKHD1L1,RSPO2
MCF7	1.99	17:62460801-65520900	DUP	3060100	49	AC005544.1,AC006080.1,AC006947.1,AC009994.2,APOH,AXIN2,CACNG1,CACNG4,CACNG5,CEP112,CEP95,CTD-2535L24.3,CTD-2653B5.1,GNA13,HELZ,LRRC37A3,MILR1,MIR3064,MIR5047,MIR548AA2,MIR634,PITPNC1,POLG2,PSMD12,RN7SL404P,RN7SL409P,RN7SL735P,RN7SL756P,RNA5SP444,RNA5SP445,RNA5SP446,RNA5SP447,RNU6-928P,RNU7-115P,RP11-160O5.1,RP11-349A8.3,RP11-401F2.3,RP11-401F2.4,RP11-4F22.2,RP11-583F2.2,RP11-583F2.5,RP11-74H8.1,R…	AXIN2,GNA13
MCF7	1.98	17:65628001-66067300	DUP	439300	11	AC006534.1,AC006534.2,BPTF,C17orf58,KPNA2,NOL11,PITPNC1,RN7SL622P,RP11-855A2.3,RP11-855A2.5,SNORA38B	BPTF
MCF7	1.98	21:39381601-40112200	DUP	730600	10	AP001422.3,AP001434.2,DSCR10,DSCR4,DSCR4-IT1,DSCR8,ERG,KCNJ15,LINC00114,snoU13	ERG
MCF7	1.98	21:42289601-42955600	DUP	666000	13	AP001610.5,AP001610.9,AP006748.1,BACE2,BACE2-IT1,FAM3B,LINC00323,MIR3197,MX1,MX2,PLAC4,SNORA32,TMPRSS2	TMPRSS2
MCF7	1.97	1:216204001-216952400	DUP	748400	4	ESRRG,RP11-22M7.2,RP5-1099E6.3,USH2A	USH2A
MCF7	1.96	17:54958801-55687800	DUP	729000	15	AC007114.1,AKAP1,COIL,MIR3614,MSI2,RN7SL437P,RP11-118E18.2,RP11-118E18.4,RP11-166P13.3,RP11-166P13.4,RP11-670E13.5,RP5-1107A17.3,RP5-1107A17.4,SCPEP1,TRIM25	MSI2
MCF7	1.94	13:46010201-47034900	DUP	1024700	18	COG3,CPB2,CPB2-AS1,FAM194B,KIAA0226L,LCP1,LINC00563,LINC01055,RN7SKP5,RN7SL288P,RNA5SP27,RNU2-6P,RNU6-68P,RP11-189B4.6,SIAH3,SPERT,ZC3H13,snoU13	LCP1
MCF7	1.93	8:110395801-111900200	DUP	1504400	11	EBAG9,KB-1299A7.2,KCNV1,PKHD1L1,RNU2-67P,RP11-211F2.1,RP11-238I10.1,RP11-422N16.3,RP11-696P8.2,SNORD112,SYBU	PKHD1L1
MCF7	1.91	8:98595701-99465100	DUP	869400	18	C8orf47,HRSP12,KB-1208A12.3,KB-1458E12.1,KB-1517D11.4,KCNS2,LAPTM4B,MATN2,MTDH,NIPAL2,POP1,RNU6-703P,RNU6-914P,RNU7-177P,RPL30,SNORA72,STK3,Y_RNA	MTDH
MCF7	1.9	13:40788901-41973100	DUP	1184200	20	AL133318.1,ELF1,FOXO1,KBTBD6,KBTBD7,LINC00598,MIR3168,MIR320D1,MIR621,MRPS31,MTRF1,NAA16,RN7SKP2,RN7SL597P,RNU6-57P,RNY3P9,RP11-172E9.2,SLC25A15,WBP4,snoU13	FOXO1,MRPS31
MCF7	1.9	20:43067501-43305900	DUP	238400	8	ADA,C20orf62,PKIG,RP11-445H22.3,RP5-1013A22.2,SERINC3,TTPAL,Z97053.1	ADA
MCF7	1.89	1:150406601-150700700	DUP	294100	17	ADAMTSL4,ADAMTSL4-AS1,AL356356.1,ECM1,ENSA,GOLPH3L,HORMAD1,LINC00568,MCL1,MIR4257,RN7SL473P,RN7SL600P,RNU6-1042P,RP11-54A4.2,RPRD2,SNORA40,TARS2	MCL1
MCF7	1.89	16:78156259-78171480	DUP	15221	1	WWOX	WWOX
MCF7	1.89	20:43308901-45283900	DUP	1975000	71	ACOT8,AL031663.1,AL031663.2,CD40,CDH22,DBNDD2,DNTTIP1,ELMO2,EPPIN,EPPIN-WFDC6,KCNK15,KCNS1,MATN4,MIR3617,MMP9,NCOA5,NEURL2,OCSTAMP,PABPC1L,PCIF1,PI3,PIGT,PLTP,RBPJL,RIMS4,RN7SL31P,RNA5SP485,RNU6ATAC38P,RP11-445H22.3,RP11-445H22.4,RP11-465L10.10,RP3-337O18.9,RP3-461P17.10,RP3-461P17.9,RP5-998H6.2,SDC4,SEMG1,SEMG2,SLC12A5,SLC13A3,SLC35C2,SLPI,SNX21,SPATA25,SPINT3,SPINT4,STK4,STK4-AS1,SYS1,TNNC2,TOM…	YWHAB
MCF7	1.88	1:149923101-150405800	DUP	482700	15	ANP32E,APH1A,C1orf51,C1orf54,CA14,MRPS21,OTUD7B,PLEKHO1,PRPF3,RN7SL480P,RNU2-17P,RP4-790G17.7,RPRD2,VPS45,snoU13	APH1A
MCF7	1.87	3:13682201-16158600	DUP	2476400	44	AC090952.5,AC090954.1,AC090957.2,AC093495.4,AC093611.1,AC093611.2,ANKRD28,BTD,C3orf20,CHCHD4,COLQ,EAF1,EAF1-AS1,FGD5,FGD5-AS1,GRIP2,HACL1,LINC00620,LSM3,METTL6,MIR3134,MIR4270,MIR563,MRPS25,NR2C2,RN7SL110P,RN7SL4P,RNA5SP124,RNU6-1024P,RNU6-454P,RNU6-905P,RP11-536I6.1,RP11-536I6.2,RP11-95M5.1,SH3BP5,SH3BP5-AS1,SLC6A6,TMEM43,TPRXL,WNT7A,XPC,Y_RNA,ZFYVE20,snoU13	XPC
MCF7	1.87	6:151822691-152009323	DUP	186632	3	CCDC170,ESR1,RNU6-813P	ESR1
MCF7	1.86	3:8721001-9923800	DUP	1202800	31	AC018506.1,AC034187.1,AC034187.3,AC034187.4,AC034187.5,ARPC4,BRPF1,CAMK1,CAV3,CIDEC,CPNE9,LHFPL4,MTMR14,OGG1,OXTR,RAD18,RP11-266J6.2,RP11-380O24.1,RP11-58B17.2,RPUSD3,SETD5-AS1,SNORA43,SRGAP3,SRGAP3-AS1,SRGAP3-AS2,SRGAP3-AS3,SRGAP3-AS4,TADA3,THUMPD3,TTLL3,hsa-mir-548ba	BRPF1
MCF7	1.85	6:151834845-152093127	DUP	258282	3	CCDC170,ESR1,RNU6-813P	ESR1
MCF7	1.85	17:73276301-73817500	DUP	541200	25	AC100787.1,CASKIN2,GALK1,GRB2,H3F3B,ITGB4,KIAA0195,LLGL2,MIR3678,MIR4738,MYO15B,RNU6-938P,RP11-16C1.1,RP11-16C1.2,RP11-16C1.3,RP11-474I11.7,RP11-474I11.8,RP11-552F3.4,SAP30BP,SLC25A19,SMIM5,SMIM6,TSEN54,UNK,Y_RNA	GRB2
MCF7	1.84	1:146702201-147425100	DUP	722900	13	ACP6,BCL9,CHD1L,GJA5,GJA8,GPR89B,LINC00624,RN7SL261P,RP11-337C18.10,RP11-433J22.2,RP11-433J22.3,RP11-533N14.3,Y_RNA	BCL9,CHD1L
MCF7	1.83	3:9925301-10786400	DUP	861100	28	AC022007.5,AC090841.1,ATP2B2,ATP2B2-IT1,ATP2B2-IT2,BRK1,CRELD1,EMC3,FANCD2,FANCD2OS,GHRL,GHRLOS,IL17RC,IRAK2,JAGN1,LINC00852,MIR378B,MIR885,PRRT3-AS1,RNU6-670P,RNU6-814P,RNU6-882P,RP11-1020A11.1,RP11-1020A11.2,SEC13,TATDN2,VHL,snoU13	FANCD2,VHL
MCF7	1.82	3:11529801-13681200	DUP	2151400	28	AC026166.1,AC090939.1,C3orf83,CAND2,FBLN2,HDAC11,HDAC11-AS1,IQSEC1,MKRN2,NUP210,PPARG,RAF1,RN7SL147P,RNA5SP123,RNU6-377P,RNU6-404P,RP11-169K17.3,RP11-169K17.4,RP11-767C1.1,RP11-767C1.2,RPL32,SNORA7A,SYN2,TIMP4,TMEM40,TSEN2,VGLL4,snoU13	RAF1
MCF7	1.82	16:1883005-2138569	DUP	255564	26	AC005606.1,AC005606.14,AC005606.15,AL499628.1,FAHD1,GFER,HS3ST6,LA16c-429E7.1,MEIOB,MSRB1,NDUFB10,NPW,NTHL1,RN7SL219P,RN7SL367P,RNF151,RPL3L,RPS2,SLC9A3R2,SNHG9,SNORA10,SNORA64,SYNGR3,TBL3,TSC2,XX-DJ76P10__A.2	TSC2
MCF7	1.81	13:39563201-40788100	DUP	1224900	10	AL512505.1,COG6,LHFP,LINC00332,MIR4305,PROSER1,RNY4P14,SNORD116,STOML3,snoU13	PROSER1
MCF7	1.8	13:32958322-33046982	DUP	88660	5	BRCA2,N4BP2L1,N4BP2L2,RP11-298P3.4,SNORA16	BRCA2
MCF7	1.74	21:45850601-46398500	DUP	547900	33	AL773604.8,AP001065.15,C21orf67,C21orf90,FAM207A,ITGB2-AS1,KRTAP10-1,KRTAP10-10,KRTAP10-11,KRTAP10-12,KRTAP10-2,KRTAP10-3,KRTAP10-4,KRTAP10-5,KRTAP10-6,KRTAP10-7,KRTAP10-8,KRTAP10-9,KRTAP12-1,KRTAP12-2,KRTAP12-3,KRTAP12-4,LL21NC02-1C16.1,LL21NC02-1C16.2,LRRC3,LRRC3-AS1,LRRC3DN,PTTG1IP,SUMO3,TRPM2,TSPEAR,TSPEAR-AS1,snoZ6	PTTG1IP
MCF7	1.72	2:127946395-128073672	DUP	127277	2	CYP27C1,MAP3K2	MAP3K2
MCF7	1.71	8:92847501-94656200	DUP	1808700	21	AC016885.1,AC091096.1,AC117834.1,C8orf87,CTD-3239E11.2,GS1-5L10.1,LINC00535,RNA5SP274,RP11-100L22.1,RP11-100L22.2,RP11-100L22.3,RP11-100L22.4,RP11-122C21.1,RP11-388K12.1,RP11-388K12.2,RP11-587H10.1,RP11-587H10.2,RP11-700E23.1,RP11-700E23.2,RUNX1T1,TRIQK	RUNX1T1
MCF7	1.7	13:25939201-27046600	DUP	1107400	11	AL138815.1,AL138815.2,ATP8A2,CDK8,LINC00415,RN7SL289P,RN7SL741P,RNF6,RNU6-78P,RNY1P3,SHISA2	CDK8
MCF7	1.69	21:45771193-47798469	DUP	2027276	77	ADARB1,AL133493.2,AL592528.1,AL773604.8,AP001065.15,AP001065.2,AP001468.1,AP001468.58,AP001469.5,AP001469.7,AP001469.9,AP001471.1,AP001476.2,AP001476.3,AP001476.4,AP001505.9,AP001579.1,BX322557.10,BX322557.13,BX322559.3,C21orf67,C21orf90,COL18A1,COL18A1-AS1,COL18A1-AS2,COL6A1,COL6A2,FAM207A,FTCD,FTCD-AS1,ITGB2-AS1,KRTAP10-1,KRTAP10-10,KRTAP10-11,KRTAP10-12,KRTAP10-2,KRTAP10-3,KRTAP10-4,KRTAP10-5,…	PTTG1IP
MCF7	1.67	1:206482301-206696600	DUP	214300	6	C1orf147,IKBKE,RASSF5,RP11-534L20.5,SRGAP2,SRGAP2-AS1	IKBKE
MCF7	1.67	11:117386095-118894272	DUP	1508177	51	AMICA1,AP002954.3,AP002954.4,ARCN1,ATP5L,BCL9L,CCDC84,CD3D,CD3E,CXCR5,DDX6,DSCAML1,FOXR1,FXYD2,FXYD6,FXYD6-FXYD2,IFT46,IL10RA,KMT2A,MIR3656,MIR4492,MPZL2,MPZL3,Metazoa_SRP,PHLDB1,RN7SL529P,RN7SL688P,RN7SL86P,RNU6-1157P,RNU6-376P,RP11-110I1.11,RP11-110I1.12,RP11-158I9.5,RP11-158I9.7,RP11-35P15.1,RP11-728F11.3,RP11-728F11.4,RP11-770J1.3,RP11-770J1.4,RP11-770J1.5,RP11-770J1.7,SCN2B,TMEM25,TMPRSS13,T…	DDX6,KMT2A
MCF7	1.67	13:32177901-33138600	DUP	960700	11	BRCA2,FRY,FRY-AS1,LINC01073,N4BP2L1,N4BP2L2,RP11-298P3.4,RP11-37E23.5,RXFP2,SNORA16,ZAR1L	BRCA2
MCF7	1.67	13:33139301-33427800	DUP	288500	2	PDS5B,RNY1P4	PDS5B
MCF7	1.65	3:2747801-3411900	DUP	664100	7	AC026188.1,CNTN4,CNTN4-AS1,IL5RA,RP11-97C16.1,SNORA43,TRNT1	CNTN4
MCF7	1.64	1:110191801-110548000	DUP	356200	13	AC000032.2,AHCYL1,CSF1,EPS8L3,GSTM1,GSTM2,GSTM3,GSTM4,GSTM5,RP11-195M16.1,RP11-195M16.3,RP4-735C1.4,RP4-735C1.6	CSF1,GSTM1
MCF7	1.64	12:58063445-58301121	DUP	237676	19	AC025165.1,AGAP2,AGAP2-AS1,CDK4,CTDSP2,MARCH9,METTL1,METTL21B,MIR26A2,OS9,RNU6-1083P,RP11-571M6.17,RP11-571M6.18,RP11-571M6.7,RP11-571M6.8,RP11-620J15.1,RP11-620J15.2,TSFM,TSPAN31	CDK4
MCF7	1.64	13:28573401-29963000	DUP	1389600	10	AL596092.1,FLT1,FLT3,MTUS2,MTUS2-AS2,PAN3-AS1,POMP,RNU6-53P,RNU6-82P,SLC46A3	FLT1,FLT3
MCF7	1.64	15:93345505-93503917	DUP	158412	6	AC013394.2,CHD2,CTD-2313J17.1,FAM174B,MIR3175,RN7SL599P	CHD2
MCF7	1.63	1:205521401-205922700	DUP	401300	13	AC119673.1,ELK4,MFSD4,NUCKS1,PM20D1,RAB7L1,RNU2-19P,RNU6-418P,RP4-681L3.2,SLC26A9,SLC41A1,SLC45A3,SNORA72	SLC45A3
MCF7	1.63	11:65171476-65285732	DUP	114256	5	AP000769.1,AP000769.7,FRMD8,MALAT1,NEAT1	MALAT1
MCF7	1.63	12:64761201-66376900	DUP	1615700	32	AC025262.1,AC090673.1,AC090673.2,C12orf56,GNS,HMGA2,LEMD3,MIR548C,MSRB3,RNU6-166P,RNU6ATAC42P,RP11-168J19.2,RP11-221N13.2,RP11-221N13.3,RP11-221N13.4,RP11-230G5.2,RP11-305O6.3,RP11-338E21.1,RP11-338E21.2,RP11-338E21.3,RP11-366L20.2,RP11-366L20.3,RP11-439H13.2,RP11-629N8.3,RP11-766N7.3,RP11-766N7.4,SNORD83,TBC1D30,TBK1,WIF1,XPOT,snoU13	HMGA2
MCF7	1.63	16:1788501-2490400	DUP	701900	64	ABCA3,AC005606.1,AC005606.14,AC005606.15,AC009065.1,AC009065.2,AC009065.3,AL499628.1,BRICD5,CASKIN1,DNASE1L2,E4F1,ECI1,EME2,FAHD1,GFER,HAGH,HS3ST6,IGFALS,LA16c-361A3.3,LA16c-429E7.1,MAPK8IP3,MEIOB,MIR1225,MIR3180-5,MIR3677,MIR4516,MIR4717,MIR940,MLST8,MRPS34,MSRB1,NDUFB10,NME3,NPW,NTHL1,NUBP2,PGP,PKD1,RN7SL219P,RN7SL367P,RNF151,RNPS1,RP11-304L19.1,RP11-304L19.11,RP11-304L19.12,RP11-304L19.2,RP11-…	MAPK8IP3,PGP,TSC2
MCF7	1.62	1:203065201-205520600	DUP	2455400	56	AC096645.1,ADORA1,AL161793.1,AL583832.1,ATP2B4,CDK18,CHIT1,CNTN2,DSTYK,ETNK2,FMOD,GOLT1A,KISS1,KLHDC8A,LAX1,LEMD1,LEMD1-AS1,LINC00303,LINC01136,LRRN2,MDM4,MIR135B,MYBPH,NFASC,NUAK2,OPTC,PIK3C2B,PLEKHA6,PPP1R15B,PRELP,RBBP5,REN,RNA5SP74,RNA5SP75,RNU6-487P,RP11-134P9.3,RP11-203F10.5,RP11-23I7.1,RP11-335O13.7,RP11-335O13.8,RP11-383G10.5,RP11-430C7.4,RP11-430C7.5,RP11-576D8.4,RP11-739N20.2,RP11-74C13…	MDM4,PIK3C2B
MCF7	1.61	1:201986301-202141400	DUP	155100	4	ARL8A,ELF3,GPR37L1,PTPN7	ELF3
MCF7	1.61	13:28510401-28572800	DUP	62400	5	ATP5EP2,CDX2,LINC00543,RN7SL272P,URAD	CDX2
MCF7	1.61	16:67166201-68090600	DUP	924400	55	AC009095.4,AC040160.1,AC040162.1,AC130462.1,ACD,AGRP,B3GNT9,C16orf70,CTC-479C5.10,CTC-479C5.17,CTC-479C5.6,CTCF,CTD-2012K14.2,CTD-2012K14.3,CTD-2012K14.4,CTD-2012K14.6,CTD-2012K14.7,CTRL,DDX28,DPEP2,DPEP3,DUS2,E2F4,EDC4,ELMO3,ENKD1,EXOC3L1,FAM65A,FBXL8,GFOD2,HSD11B2,HSF4,KIAA0895L,LCAT,LRRC29,LRRC36,MIR328,NOL3,NRN1L,NUTF2,PARD6A,PSMB10,RANBP10,RLTPR,RN7SKP118,RNU1-123P,RNU6-359P,RP11-167P11.2,RP…	CTCF
MCF7	1.61	16:78296001-78309300	DUP	13300	1	WWOX	WWOX
MCF7	1.61	16:85444401-86006600	DUP	562200	15	AC092377.1,C16orf74,COX4I1,CTD-2542L18.1,GINS2,GSE1,IRF8,MIR1910,RN7SL381P,RNU1-103P,RP11-118F19.1,RP11-542M13.3,RP11-568J23.4,RP11-568J23.5,RP11-568J23.6	IRF8
MCF7	1.6	10:92501-367800	DUP	275300	6	AL603831.1,DIP2C,RNA5SP297,RNA5SP298,TUBB8,ZMYND11	ZMYND11
MCF7	1.6	16:3580001-3929600	DUP	349600	6	CLUAP1,CREBBP,LA16c-390H2.4,RP11-461A8.1,RP11-461A8.4,SLX4	CREBBP,SLX4
MCF7	1.6	16:78068501-78295400	DUP	226900	3	RP11-190D6.2,RP11-281J9.2,WWOX	WWOX
MCF7	1.59	16:69854701-71978400	DUP	2123700	67	AARS,AC009060.1,AC027281.1,AC106736.1,AP1G1,ATXN1L,CALB2,CHST4,CLEC18A,CLEC18C,CMTR2,CTD-2520I13.1,DDX19A,DDX19B,EXOSC6,FKSG63,FLJ00418,FUK,HYDIN,IL34,IST1,MARVELD3,MIR140,MIR1972-2,MTSS1L,PDPR,PDXDC2P,PKD1L3,RN7SL279P,RN7SL407P,RNU6-1061P,RNU6-208P,RNU6-23P,RNU6ATAC25P,RP11-23E19.1,RP11-23E19.2,RP11-296I10.3,RP11-394B2.6,RP11-424M24.5,RP11-432I5.1,RP11-432I5.2,RP11-432I5.4,RP11-432I5.6,RP11-432I…	EXOSC6,HYDIN
MCF7	1.59	16:81481101-82149100	DUP	668000	8	7SK,AC138304.1,CMIP,HSD17B2,PLCG2,RP11-510J16.5,RP11-960L18.1,SDR42E1	PLCG2
MCF7	1.58	5:176456101-176535200	DUP	79100	3	FGFR4,ZNF346,ZNF346-IT1	FGFR4
MCF7	1.58	10:5766701-6840700	DUP	1074000	24	ANKRD16,DKFZP667F0711,FAM208B,FBXO18,GDI2,IL15RA,IL2RA,LINC00707,MIR3155A,PFKFB3,PRKCQ,PRKCQ-AS1,RBM17,RN7SKP78,RP11-318E3.9,RP11-336A10.2,RP11-414H17.5,RP11-536K7.3,RP11-536K7.5,RP11-554I8.1,RP11-554I8.2,RP11-563J2.2,SNORA14,Y_RNA	IL2RA
MCF7	1.58	10:7780301-8310200	DUP	529900	9	ATP5C1,GATA3,GATA3-AS1,ITIH2,KIN,LINC00708,RP11-379F12.3,RP11-379F12.4,TAF3	GATA3
MCF7	1.58	11:118226601-119377600	DUP	1151000	62	ABCG4,ACA64,AP002954.3,AP002954.4,AP002956.1,ARCN1,ATP5L,BCL9L,C1QTNF5,C2CD2L,CBL,CCDC153,CCDC84,CXCR5,DDX6,DPAGT1,FOXR1,H2AFX,HINFP,HMBS,HYOU1,IFT46,KMT2A,MCAM,MFRP,MIR3656,MIR4492,NLRX1,PHLDB1,RN7SL529P,RN7SL688P,RN7SL86P,RNF26,RNU6-1157P,RNU6-262P,RNU6-376P,RP11-110I1.11,RP11-110I1.12,RP11-110I1.13,RP11-110I1.14,RP11-110I1.6,RP11-158I9.5,RP11-158I9.7,RP11-334E6.10,RP11-334E6.12,RP11-334E6.3,RP…	CBL,DDX6,HMBS,KMT2A
MCF7	1.58	16:2493401-3579200	DUP	1085800	83	AC092117.1,AC092117.2,AJ003147.8,AJ003147.9,AMDHD2,ATP6C,ATP6V0C,C16orf59,C16orf90,CASP16,CEMP1,CLDN6,CLDN9,CLUAP1,CTD-3126B10.1,CTD-3126B10.4,ERVK13-1,FLYWCH1,FLYWCH2,HCFC1R1,IL32,KCTD5,KREMEN2,LA16c-306E5.3,LA16c-321D4.2,LA16c-325D7.1,LA16c-325D7.2,LA16c-360H6.3,LA16c-380H5.2,LA16c-380H5.3,LA16c-380H5.4,LA16c-380H5.5,LINC00514,MEFV,MIR3178,MMP25,MTRNR2L4,NAA60,NTN3,OR1F1,OR2C1,PAQR4,PDPK1,PKMYT…	FLYWCH1
MCF7	1.57	1:153835377-154009081	DUP	173704	10	CREB3L4,GATAD2B,JTB,NUP210L,RAB13,RP11-422P24.10,RP11-422P24.11,RPS27,SLC39A1,U3	RPS27
MCF7	1.57	16:68765401-69854300	DUP	1088900	33	CDH1,CHTF8,CIRH1A,COG8,CTD-2033A16.1,CTD-2033A16.3,CYB5B,HAS3,MIR1538,NIP7,NOB1,NQO1,PDF,RNA5SP429,RNU6-22P,RNU6-898P,RP11-140H17.1,RP11-311C24.1,RP11-343C2.11,RP11-343C2.12,RP11-343C2.9,RP11-354M1.2,RP11-521L9.1,RP11-521L9.2,RP11-70O5.2,SNORA62,SNTB2,TERF2,TMED6,VPS4A,WWP2,Y_RNA,snoU13	CDH1
MCF7	1.56	3:155284401-156384500	DUP	1100100	9	AC104472.1,C3orf33,GMPS,KCNAB1-AS1,KCNAB1-AS2,PLCH1,RP11-305K5.1,SLC33A1,SSR3	GMPS
MCF7	1.56	5:176613201-176945000	DUP	331800	13	DBN1,DOK3,F12,GRK6,LMAN2,PFN3,PRELID1,PRR7,PRR7-AS1,RGS14,RN7SL562P,RP11-1334A24.6,SLC34A1	PRELID1
MCF7	1.56	20:62268101-62462000	DUP	193900	11	ARFRP1,LIME1,RP4-583P15.10,RP4-583P15.11,RP4-583P15.14,RTEL1,SLC2A4RG,STMN3,TNFRSF6B,ZBTB46,ZGPAT	ARFRP1
MCF7	1.55	9:115837501-116138200	DUP	300700	11	BSPRY,CDC26,FAM225A,FAM225B,FKBP15,HDHD3,PRPF4,RNF183,SLC31A1,SLC31A2,WDR31	SLC31A1
MCF7	1.55	17:70082120-70294587	DUP	212467	3	AC007461.2,SOX9,SOX9-AS1	SOX9
MCF7	1.54	1:182378101-185694800	DUP	3316700	49	AL137800.1,AL450304.1,AL513344.1,APOBEC4,ARPC5,C1orf21,COLGALT2,DHX9,EDEM3,FAM129A,GS1-115G20.1,GS1-120K12.4,GS1-204I12.1,GS1-204I12.4,GS1-279B7.1,GS1-279B7.2,LAMC1,LAMC2,LINC00272,NCF2,NMNAT2,NPL,RGL1,RGS16,RGS8,RGSL1,RN7SL654P,RNA5SP71,RNA5SP72,RNASEL,RNF2,RNU6-41P,RNU7-13P,RNU7-183P,RP1-127C7.6,RP11-181K3.4,RP11-317P15.3,RP11-317P15.4,RP11-317P15.5,RP11-382D12.1,RP11-382D12.2,RP11-444D13.1,SHC…	RGL1
MCF7	1.54	3:169489401-170412200	DUP	922800	25	CLDN11,GPR160,LRRC31,LRRC34,LRRIQ4,MYNN,PHC3,PRKCI,RNU4-38P,RNU6-315P,RP11-362K14.5,RP11-362K14.6,RP11-362K14.7,RP11-373E16.3,RP11-379K17.12,RP11-379K17.4,RP11-469J4.3,RP11-543D10.2,RP11-816J6.3,SAMD7,SEC62,SEC62-AS1,SKIL,SLC7A14,Y_RNA	PRKCI
MCF7	1.53	1:171067001-172593500	DUP	1526500	28	C1orf105,DNM3,DNM3-IT1,DNM3OS,FMO1,FMO2,FMO3,FMO4,METTL13,MIR1295A,MIR199A2,MIR214,MYOC,PIGC,PRRC2C,RN7SL425P,RNU6-157P,RNU6-290P,RNU6-693P,RNU6-773P,RP1-127D3.4,RP1-45C12.1,SCARNA20,SNORD112,SUCO,VAMP4,Y_RNA,snoU13	MYOC
MCF7	1.53	1:192851101-193130600	DUP	279500	8	CDC73,GLRX2,LINC01032,MIR1278,RP11-101E13.5,TROVE2,UCHL5,snoU109	CDC73
MCF7	1.53	1:193131501-193532800	DUP	401300	3	B3GALT2,CDC73,LINC01031	CDC73
MCF7	1.53	3:1750401-2746700	DUP	996300	4	CNTN4,CNTN4-AS2,RN7SKP144,RP11-204C23.1	CNTN4
MCF7	1.53	5:179335201-179852400	DUP	517200	7	CTB-129O4.1,CTC-563A5.2,GFPT2,MAPK9,MIR340,RASGEF1C,RNF130	MAPK9
MCF7	1.53	12:69630701-70872300	DUP	1241600	21	CCT2,CNOT2,CPSF6,FRS2,KCNMB4,LRRC10,LYZ,MIR3913-1,MYRFL,RAB3IP,RN7SL804P,RNU4-65P,RP11-1143G9.4,RP11-320P7.1,RP11-320P7.2,RP11-588G21.2,RP11-588H23.3,RP11-611E13.2,RP11-611E13.3,RP11-956E11.1,YEATS4	FRS2
MCF7	1.53	16:1424101-1786700	DUP	362600	19	AL031721.1,C16orf91,CRAMP1L,HN1L,IFT140,LA16c-312E8.2,LA16c-329F2.1,LA16c-385E7.1,LA16c-390E6.3,LA16c-390E6.4,LA16c-390E6.5,LA16c-395F10.1,LA16c-395F10.2,LA16c-425C2.1,MAPK8IP3,MIR3177,PTX4,TMEM204,UNKL	IFT140,MAPK8IP3
MCF7	1.53	16:78332501-78373100	DUP	40600	1	WWOX	WWOX
MCF7	1.53	16:86353201-87525800	DUP	1172600	28	C16orf95,CTD-2015G9.1,CTD-2015G9.2,FBXO31,FENDRR,FOXC2,FOXF1,FOXL1,LINC00917,MAP1LC3B,MTHFSD,RP11-134D3.1,RP11-134D3.2,RP11-158I3.3,RP11-178L8.3,RP11-178L8.4,RP11-178L8.5,RP11-178L8.7,RP11-178L8.8,RP11-178L8.9,RP11-463O9.5,RP11-463O9.6,RP11-463O9.9,RP11-58A18.1,RP11-899L11.1,RP11-899L11.3,ZCCHC14,snoU13	FBXO31
MCF7	1.53	20:14597401-14617800	DUP	20400	2	MACROD2,MACROD2-IT1	MACROD2
MCF7	1.52	1:178916101-179607300	DUP	691200	13	ABL2,AL160286.1,AXDND1,FAM20B,NPHS2,RN7SL374P,RNU5F-2P,RP11-545A16.1,RP11-545A16.4,SNORA67,SOAT1,TDRD5,TOR3A	ABL2
MCF7	1.52	3:168667701-169487900	DUP	820200	8	ACTRT3,MECOM,RNU6-637P,RP11-152C17.1,RP11-3K16.2,RP11-641D5.2,RP11-816J6.3,TERC	MECOM,TERC
MCF7	1.52	12:68134301-69332600	DUP	1198300	17	AC124890.1,GS1-410F4.4,IFNG,IFNG-AS1,IL22,IL26,MDM2,NUP107,RAP1B,RNU7-4P,RP11-611O2.1,RP11-611O2.5,RP11-637A17.2,RP11-71J4.2,RP11-81H14.2,SLC35E3,SNORA70G	MDM2
MCF7	1.52	13:19850701-21051400	DUP	1200700	20	AL354808.2,AL591925.1,CRYL1,GJA3,GJB2,GJB6,LINC00350,LINC00421,LINC00556,LINC01072,MIR4499,MPHOSPH8,PSPC1,RN7SL166P,RP11-385E5.5,RP11-523H24.3,RP11-61K9.2,TPTE2,ZMYM2,snoU13	GJB2,MPHOSPH8,ZMYM2
MCF7	1.52	16:78492001-78558600	DUP	66600	2	RP11-264L1.4,WWOX	WWOX
MCF7	1.52	16:88614101-89495600	DUP	881500	41	AC092384.1,AC137932.1,AC137932.5,AC137932.6,ACSF3,ANKRD11,APRT,CBFA2T3,CDH15,CDT1,CTD-2555A7.1,CTD-2555A7.2,CTD-2555A7.3,CTU2,CYBA,GALNS,LINC00304,MIR4722,PABPN1L,PIEZO1,RNF166,RP1-168P16.1,RP1-168P16.2,RP11-46C24.3,RP11-46C24.5,RP11-46C24.6,RP11-46C24.7,RP11-830F9.5,RP11-830F9.6,RP11-830F9.7,RP5-1142A6.2,RP5-1142A6.5,RP5-1142A6.7,RP5-1142A6.8,RP5-1142A6.9,SLC22A31,SNAI3,SNAI3-AS1,TRAPPC2L,ZC3H18…	CBFA2T3
MCF7	1.52	16:89654501-90294700	DUP	640200	25	AC137934.1,C16orf3,CDK10,CENPBD1,CHMP1A,CPNE7,DBNDD1,DEF8,DPEP1,FAM157C,FANCA,GAS8,PRDM7,RNU6-355P,RP11-356C4.3,RP11-356C4.5,RP11-368I7.4,RP11-566K11.4,RP11-566K11.5,SPATA2L,SPATA33,SPIRE2,TUBB3,VPS9D1,VPS9D1-AS1	FANCA,TUBB3
MCF7	1.51	1:176102401-177118100	DUP	1015700	5	ASTN1,MIR488,PAPPA2,RNU2-12P,RP11-195C7.1	PAPPA2
MCF7	1.51	3:188075771-188112692	DUP	36921	1	LPP	LPP
MCF7	1.51	5:170270701-171795400	DUP	1524700	19	AC008671.1,AC011410.1,AC113342.1,CTB-78H18.1,EFCAB9,FBXW11,FGF18,MIR3912,NPM1,RN7SL339P,RN7SL623P,SH3PXD2B,SMIM23,SNORA57,SNORA70,STK10,TLX3,UBTD2,snoU13	NPM1,TLX3
MCF7	1.5	3:170412901-170936400	DUP	523500	9	CLDN11,EIF5A2,MIR569,RNU1-70P,RNY5P3,RP11-373E16.4,RPL22L1,SLC2A2,TNIK	EIF5A2
MCF7	1.5	5:178840001-179334200	DUP	494200	19	AC136604.1,C5orf45,CANX,CBY3,CTC-241N9.1,HNRNPH1,MAML1,MGAT4B,MIR1229,RN7SKP150,RN7SL71P,RP11-1379J22.2,RP11-1379J22.5,RP11-798K23.1,RP11-798K23.4,RUFY1,SQSTM1,TBC1D9B,Y_RNA	MAML1
MCF7	1.5	20:14101601-14113700	DUP	12100	1	MACROD2	MACROD2
MCF7	1.49	3:150749201-152411700	DUP	1662500	25	AADAC,AC069067.1,AC078816.1,CLRN1-AS1,GPR171,GPR87,IGSF10,MBNL1,MBNL1-AS1,MED12L,MIR5186,P2RY12,P2RY13,P2RY14,RNA5SP145,RP11-166N6.2,RP11-246A10.1,RP11-362A9.3,RP11-454C18.1,RP11-454C18.2,RP11-64D22.5,RP11-788A4.1,SUCNR1,TMEM14E,Y_RNA	MED12L
MCF7	1.49	9:123855401-124588400	DUP	733000	15	AL161784.1,AL357936.1,CNTRL,DAB2IP,GSN,GSN-AS1,RAB14,RN7SL181P,RN7SL187P,RP11-162D16.2,RP11-244O19.1,RP11-477J21.6,RP11-524G24.2,STOM,TTLL11	CNTRL
MCF7	1.49	16:79067801-80837800	DUP	1770000	23	AC009159.1,AC092332.1,CDYL2,CTD-2055G21.1,DYNLRB2,MAF,RNA5SP431,RP11-109P11.1,RP11-148M9.1,RP11-18F14.1,RP11-18F14.4,RP11-345M22.1,RP11-345M22.2,RP11-345M22.3,RP11-467I17.1,RP11-525K10.1,RP11-525K10.2,RP11-525K10.3,RP11-556H2.2,RP11-556H2.3,RP11-556H2.4,RP11-679B19.2,WWOX	MAF,WWOX
MCF7	1.48	1:158078101-158411100	DUP	333000	9	CD1A,CD1B,CD1C,CD1D,CD1E,OR10K2,OR10T2,RP11-404O13.1,RP11-404O13.5	CD1D
MCF7	1.48	5:179853901-180375000	DUP	521100	15	AC122714.1,BTNL8,CNOT6,CTC-205M6.5,CTC-573N18.1,FLT4,LINC00847,MGAT1,OR2Y1,RNU1-17P,RNU6-525P,RP11-451H23.3,SCGB3A1,Y_RNA,ZFP62	FLT4
MCF7	1.48	20:10099001-11377900	DUP	1278900	15	AL023913.1,C20orf187,JAG1,MKKS,RP1-278O22.1,RP1-278O22.2,RP11-103J8.1,RP11-103J8.2,RP11-416N4.1,RP11-416N4.4,RP4-697P8.3,RP4-734C18.1,SLX4IP,SNAP25,SNAP25-AS1	JAG1
MCF7	1.48	20:61263401-61724700	DUP	461300	21	BHLHE23,COL9A3,DIDO1,GID8,LINC00029,LINC00659,LINC00686,LINC01056,MRGBP,NTSR1,OGFR,OGFR-AS1,RP11-305P22.9,RP11-93B14.4,RP11-93B14.5,RP11-93B14.6,RP13-30A9.1,RP13-30A9.2,SLC17A9,SLCO4A1,TCFL5	OGFR
MCF7	1.47	2:88125301-88416200	DUP	290900	6	KRCC1,MIR4780,RGPD2,RNU2-63P,SMYD1,snoU13	SMYD1
MCF7	1.47	3:136353601-136441500	DUP	87900	2	RNU6-789P,STAG1	STAG1
MCF7	1.47	12:48625601-51217000	DUP	2591400	86	AC024257.1,AC073610.5,AC140061.12,ADCY6,ANP32D,AQP5,ARF3,ASIC1,ATF1,BCDIN3D,BCDIN3D-AS1,C12orf54,C1QL4,CCDC65,CCNT1,COX14,DDN,DDX23,DHH,DNAJC22,FAIM2,FAM186A,FAM186B,FMNL3,GPD1,H1FNT,KCNH3,KMT2D,LALBA,LARP4,LIMA1,LINC00935,MCRS1,MIR1293,MIR4701,NCKAP5L,OR8S1,PRKAG1,PRPF40B,PRPH,RACGAP1,RHEBL1,RND1,RNU6-1093P,RNU6-238P,RNU6-600P,RNU6-769P,RNU6-834P,RNU6-940P,RP11-133N21.10,RP11-161H23.5,RP11-161H2…	ATF1,FAIM2,KMT2D,WNT1
MCF7	1.47	20:12738101-14099500	DUP	1361400	14	AL117333.1,ESF1,ISM1,ISM1-AS1,MACROD2,NDUFAF5,RNU6-278P,RP11-157E14.1,RP5-1069C8.2,RP5-1069C8.3,RP5-1077I2.3,SEL1L2,SPTLC3,TASP1	MACROD2
MCF7	1.47	20:14597408-20293826	DUP	5696418	77	AL035045.1,AL049647.1,AL050321.1,AL118509.1,AL121584.1,AL121761.1,AL121761.2,AL121893.1,AL136090.1,AL139429.1,BANF2,BFSP1,C20orf26,C20orf78,CRNKL1,CSRP2BP,DSTN,DTD1,DZANK1,KIF16B,LINC00493,LINC00652,LINC00851,MACROD2,MACROD2-AS1,MACROD2-IT1,MGME1,MIR3192,NAA20,OTOR,OVOL2,PCSK2,PET117,POLR3F,RBBP9,RIN2,RN7SKP69,RN7SKP74,RN7SL14P,RN7SL638P,RNA5SP475,RNA5SP476,RNU1-131P,RNU2-56P,RNU6-1159P,RNU6-115P…	MACROD2
MCF7	1.46	3:176682301-176840600	DUP	158300	3	TBL1XR1,TBL1XR1-AS1,Y_RNA	TBL1XR1
MCF7	1.46	10:3105101-4290100	DUP	1185000	17	KLF6,LINC00702,PFKP,PITRM1,PITRM1-AS1,RP11-118K6.3,RP11-184A2.2,RP11-184A2.3,RP11-195B3.1,RP11-298E9.5,RP11-298E9.6,RP11-433J20.1,RP11-433J20.2,RP11-464C19.2,RP11-464C19.3,RP11-482E14.1,RP11-482E14.2	KLF6
MCF7	1.45	9:97076101-99034500	DUP	1958400	38	AL160269.1,C9orf3,DKFZP434H0512,ERCC6L2,FANCC,FBP1,FBP2,HIATL1,HSD17B3,LINC00092,LINC00476,MIR2278,MIR23B,MIR27B,MIR3074,NUTM2F,PTCH1,RNA5SP288,RNA5SP289,RNU2-46P,RNU6-1160P,RNU6-669P,RP11-180I4.2,RP11-240L7.4,RP11-307E17.8,RP11-332M4.1,RP11-435O5.2,RP11-435O5.4,RP11-435O5.5,RP11-435O5.6,RP11-435O5.7,RP11-49O14.2,RP11-49O14.3,RP11-54O15.3,RP11-569G13.2,RP11-80I15.4,Y_RNA,snoU13	FANCC,PTCH1
MCF7	1.45	9:121238601-123854100	DUP	2615500	16	BRINP1,C5,CDK5RAP2,CNTRL,FBXW2,MEGF9,MIR147A,PHF19,PSMD5,PSMD5-AS1,RP11-127L21.1,RP11-295D22.1,RP11-349E4.1,RP11-360A18.1,RP11-360A18.2,TRAF1	CNTRL
MCF7	1.45	11:66783830-66928396	DUP	144566	3	KDM2A,RHOD,SYT12	KDM2A
MCF7	1.45	12:57887801-58364200	DUP	476400	33	AC025165.1,AC025165.8,AGAP2,AGAP2-AS1,ARHGEF25,CDK4,CTDSP2,DCTN2,DDIT3,DTX3,KIF5A,MARCH9,MBD6,METTL1,METTL21B,MIR26A2,MIR616,OS9,PIP4K2C,RN7SL312P,RNU6-1083P,RNU6-594P,RP11-571M6.17,RP11-571M6.18,RP11-571M6.7,RP11-571M6.8,RP11-620J15.1,RP11-620J15.2,RP11-620J15.3,TSFM,TSPAN31,XRCC6BP1,snoU13	CDK4,DDIT3
MCF7	1.45	21:36189443-36235340	DUP	45897	1	RUNX1	RUNX1
MCF7	1.44	1:170483801-171064800	DUP	581000	9	BX284613.1,FMO3,GORAB,MROH9,PRRX1,RP1-79C4.1,RP1-79C4.4,RP11-545I10.2,RP11-576I22.2	PRRX1
MCF7	1.44	1:185696301-186458200	DUP	761900	10	AL596220.1,C1orf27,GS1-174L6.4,HMCN1,OCLM,PDC,PRG4,RNU6-1240P,RP11-295K2.3,TPR	HMCN1,PRG4
MCF7	1.44	9:92986101-94185600	DUP	1199500	13	AUH,DIRAS2,LINC00484,NFIL3,RP11-305L7.1,RP11-305L7.3,RP11-305L7.6,RP11-305L7.7,RP11-367F23.1,RP11-367F23.2,RP11-389K14.3,RP11-555F9.2,SYK	SYK
MCF7	1.44	20:15237701-16207200	DUP	969500	4	AL121584.1,MACROD2,RNA5SP475,RP11-388K2.1	MACROD2
MCF7	1.43	3:149212101-195656396	DUP	46444295	99	AADAC,AC020636.1,AC069067.1,AC078816.1,AC104472.1,AC117395.1,ANKUB1,ARHGEF26,ARHGEF26-AS1,C3orf33,C3orf79,CCNL1,CLRN1,CLRN1-AS1,COMMD2,DHX36,FAM188B2,GMPS,GPR149,GPR171,GPR87,IGSF10,KCNAB1-AS1,KCNAB1-AS2,LEKR1,LINC00880,LINC00881,LINC00886,MBNL1,MBNL1-AS1,MED12L,MIR5186,MME,MME-AS1,Metazoa_SRP,P2RY1,P2RY12,P2RY13,P2RY14,PFN2,PLCH1,PLCH1-AS1,PLCH1-AS2,RAP2B,RN7SKP177,RN7SL300P,RNA5SP145,RNF13,RNU6…	GMPS,MED12L
MCF7	1.43	9:79558101-81403700	DUP	1845600	10	CEP78,FOXB2,GNA14,GNAQ,PSAT1,RN7SKP59,RNU6-1303P,RP11-466A17.1,VPS13A,VPS13A-AS1	GNAQ
MCF7	1.43	15:93321701-93754000	DUP	432300	9	AC013394.2,AC112693.2,CHD2,CTD-2313J17.1,CTD-2313J17.5,FAM174B,MIR3175,RGMA,RN7SL599P	CHD2
MCF7	1.43	16:78563201-79065600	DUP	502400	5	PIH1,RP11-264L1.3,RP11-319G9.3,RP11-319G9.5,WWOX	WWOX
MCF7	1.42	9:86463601-87412200	DUP	948600	12	C9orf64,HNRNPK,KIF27,MIR7-1,NTRK2,RMI1,RP11-158D2.2,RP11-380F14.2,RP11-575L7.4,RP11-575L7.8,SLC28A3,Y_RNA	NTRK2
MCF7	1.42	9:101311601-101867200	DUP	555600	7	ANKS6,COL15A1,GABBR2,GALNT12,RP11-92C4.3,RP11-92C4.6,TGFBR1	TGFBR1
MCF7	1.42	12:78355701-79572700	DUP	1217000	9	NAV3,RP11-123M21.1,RP11-136F16.1,RP11-171L9.1,RP11-38F22.1,RP11-390N6.1,RP11-754N21.1,RP11-90C1.1,SYT1	NAV3
MCF7	1.42	20:61766801-62238700	DUP	471900	22	ARFGAP1,BIRC7,C20orf195,CHRNA4,COL20A1,EEF1A2,GMEB2,HELZ2,KCNQ2,MIR124-3,MIR3196,MIR4326,NKAIN4,PPDPF,PTK6,RNU6-994P,RP11-261N11.8,RP11-358D14.2,RP4-697K14.3,RP5-963E22.4,SRMS,YTHDF1	BIRC7,EEF1A2,PTK6
MCF7	1.41	12:48028401-48365300	DUP	336900	10	AC004466.1,ENDOU,HDAC7,RAPGEF3,RP1-197B17.3,RP11-89H19.1,RP5-1057I20.2,RPAP3,SLC48A1,VDR	HDAC7,VDR
MCF7	1.41	12:77068801-78354200	DUP	1285400	11	AC073528.1,CSRP2,E2F7,NAV3,RP1-34H18.1,RP1-81P11.1,RP1-97G4.1,RP11-461F16.3,RP11-781A6.1,ZDHHC17,snoU13	NAV3
MCF7	1.41	17:47646901-47846800	DUP	199900	7	FAM117A,NXPH3,RP11-613C6.2,RP5-1029K10.2,RP5-1029K10.4,SLC35B1,SPOP	SPOP
MCF7	1.4	1:186464101-186826100	DUP	362000	4	GS1-304P7.3,PLA2G4A,PTGS2,RP5-973M2.2	PTGS2
MCF7	1.4	2:127232901-128333700	DUP	1100800	15	AC010976.2,AC068282.3,AC114783.1,BIN1,CYP27C1,GYPC,MAP3K2,MIR4783,MYO7B,RNU4-48P,RNU6-1147P,RNU6-675P,RNU7-182P,RP11-521O16.1,RP11-521O16.2	MAP3K2
MCF7	1.4	3:24945301-26451000	DUP	1505700	10	AC092798.1,AC133680.1,LINC00692,MIR4442,OXSM,RARB,RN7SL216P,RNA5SP125,RNA5SP126,SNORD5	RARB
MCF7	1.4	9:101868001-102262700	DUP	394700	7	NAMA,RN7SKP225,RN7SL794P,RNA5SP290,RP11-96L7.2,SEC61B,TGFBR1	TGFBR1
MCF7	1.4	9:107256501-109788400	DUP	2531900	29	ABCA1,FKTN,FSD1L,NIPSNAP3A,OR13C2,OR13C3,OR13C4,OR13C5,OR13C8,OR13C9,OR13D1,OR13F1,RN7SKP191,RN7SKP77,RNA5SP292,RP11-217B7.2,RP11-217B7.3,RP11-235C23.5,RP11-308N19.1,RP11-308N19.3,RP11-308N19.4,RP11-508N12.2,RP11-508N12.4,RP11-540H22.2,RP11-6F6.1,SLC44A1,TAL2,TMEM38B,ZNF462	TAL2
MCF7	1.4	17:47354401-47646100	DUP	291700	13	AC006487.1,NGFR,PHB,RNU7-135P,RP11-1079K10.2,RP11-1079K10.3,RP11-1079K10.4,RP11-1079K10.5,RP11-81K2.1,RP5-1029K10.2,RP5-1029K10.4,Y_RNA,ZNF652	NGFR
MCF7	1.39	12:45909901-48026400	DUP	2116500	23	AMIGO2,ARID2,LINC00938,MIR4494,MIR4698,PCED1B,PCED1B-AS1,RN7SL246P,RNU6-671P,RP1-90J4.1,RP11-352M15.1,RP11-446N19.1,RP11-474P2.2,RP11-474P2.4,RP11-493L12.3,RP11-493L12.4,RP11-493L12.5,RP11-96H19.1,SCAF11,SLC38A1,SLC38A2,SLC38A4,SNORA64	ARID2
MCF7	1.38	3:182548112-182693778	DUP	145666	3	ATP11B,DCUN1D1,RP11-531F16.4	DCUN1D1
MCF7	1.38	9:87412901-88625000	DUP	1212100	5	AGTPBP1,NAA35,NTRK2,RP11-202I11.2,RP11-213G2.2	NTRK2
MCF7	1.38	9:102386001-103144300	DUP	758300	9	ERP44,INVS,NR4A3,RN7SL75P,RP11-554F20.1,RP11-60I3.4,RP11-60I3.5,STX17,TEX10	NR4A3
MCF7	1.38	14:21352301-21885800	DUP	533500	29	AL161668.5,ARHGEF40,CHD8,HNRNPC,METTL17,NDRG2,OR5AU1,RN7SL189P,RNASE13,RNASE2,RNASE3,RNASE7,RNASE8,RNU6-252P,RP11-219E7.4,RP11-524O1.4,RP11-84C10.2,RP11-84C10.3,RP11-84C10.4,RP11-998D10.1,RP11-998D10.4,RP11-998D10.7,RPGRIP1,SLC39A2,SNORD8,SNORD9,SUPT16H,TMEM253,ZNF219	CHD8
MCF7	1.37	16:5906701-6684400	DUP	777700	4	RBFOX1,RP11-420N3.2,RP11-468I15.1,RP11-509E10.1	RBFOX1
MCF7	1.37	16:6687601-6756000	DUP	68400	2	RBFOX1,RP11-420N3.2	RBFOX1
MCF7	1.35	1:156527101-156743700	DUP	216600	20	AL365181.1,APOA1BP,BCAN,CRABP2,GPATCH4,HAPLN2,HDGF,IQGAP3,ISG20L2,MRPL24,NES,PRCC,RP11-284F21.10,RP11-284F21.11,RP11-284F21.7,RP11-284F21.9,RP11-66D17.3,RP11-66D17.5,RRNAD1,TTC24	CRABP2
MCF7	1.35	1:156745701-157005400	DUP	259700	8	ARHGEF11,INSRR,LRRC71,MIR765,NTRK1,PRCC,RN7SL612P,SH2D2A	NTRK1
MCF7	1.35	9:119477401-121102200	DUP	1624800	12	AL354981.1,ASTN2,RN7SKP125,RN7SKP128,RNU6-1082P,RP11-281A20.1,RP11-281A20.2,RP11-388N2.1,RP11-500B12.1,SNORA70C,TLR4,snoZ13_snr52	TLR4
MCF7	1.34	1:45282701-45377900	DUP	95200	3	EIF2B3,PTCH2,RNU5E-6P	PTCH2
MCF7	1.34	2:121865401-122816800	DUP	951400	11	AC018737.3,AC079988.3,CLASP1,NIFK,NIFK-AS1,RNU4ATAC,RP11-204L24.2,TFCP2L1,TSN,Y_RNA,snoU13	CLASP1
MCF7	1.34	3:78633401-78891100	DUP	257700	1	ROBO1	ROBO1
MCF7	1.34	15:70633501-71657200	DUP	1023700	13	CT62,LARP6,LRRC49,RP11-138H8.2,RP11-138H8.3,RP11-138H8.6,RP11-138H8.7,RP11-592N21.2,RP11-673C5.2,RP11-96C21.1,THAP10,THSD4,UACA	UACA
MCF7	1.33	2:148570898-148646383	DUP	75485	2	ACVR2A,RNU6-1275P	ACVR2A
MCF7	1.33	11:66713301-67605000	DUP	891700	42	ACY3,ADRBK1,AIP,ALDH3B2,ANKRD13D,AP001885.1,AP003385.1,AP003419.11,AP003419.16,C11orf72,C11orf86,CABP2,CABP4,CARNS1,CDK2AP2,CLCF1,CORO1B,CTC-1337H24.1,CTC-1337H24.2,GPR152,GSTP1,KDM2A,NDUFV1,NUDT8,PC,PITPNM1,POLD4,PPP1CA,PTPRCAP,RAD9A,RHOD,RN7SKP239,RN7SL59P,RNU6-1238P,RP11-655M14.12,RP11-655M14.13,SSH3,SYT12,TBC1D10C,TBX10,U3,snoU13	AIP,CARNS1,GSTP1,KDM2A,PC
MCF7	1.33	12:103901301-104531200	DUP	629900	18	AC078819.1,C12orf73,GLT8D2,HCFC2,HSP90B1,MIR3652,NFYB,RNA5SP370,RP11-341G23.2,RP11-341G23.3,RP11-341G23.4,RP11-626I20.3,RP11-650K20.2,RP11-650K20.3,STAB2,TDG,U8,snoU13	TDG
MCF7	1.33	18:33694666-33715459	DUP	20793	2	ELP2,SLC39A6	ELP2
MCF7	1.33	X:131086701-131530100	DUP	443400	6	AL109749.1,FRMD7,MBNL3,MST4,RAP2C,RAP2C-AS1	MST4
MCF7	1.32	1:153134001-155779300	DUP	2645300	98	ADAM15,ADAR,AL590431.1,AL606500.1,AQP10,ATP8B2,BX470102.3,C1orf189,C1orf43,CHRNB2,CHTOP,CKS1B,CREB3L4,DPM3,EFNA1,EFNA3,EFNA4,FLAD1,GATAD2B,HAX1,IL6R,ILF2,INTS3,JTB,KCNN3,KRTCAP2,LELP1,LOR,MIR190B,MIR4258,MIR5698,MUC1,NPR1,NUP210L,PBXIP1,PGLYRP3,PGLYRP4,PMVK,PRR9,PYGO2,RAB13,RN7SL372P,RN7SL431P,RN7SL44P,RNU6-121P,RNU6-160P,RNU6-179P,RNU6-239P,RNU7-150P,RNU7-57P,RP1-140J1.1,RP1-178F15.4,RP1-178F15.…	CKS1B,IL6R,MUC1,RPS27,SHC1,TPM3
MCF7	1.32	2:136018601-137103200	DUP	1084600	13	AC011893.3,AC068492.1,AC093391.2,CXCR4,DARS,LCT,MCM6,MIR128-1,R3HDM1,RNU6-512P,UBXN4,Y_RNA,ZRANB3	CXCR4
MCF7	1.32	9:104258001-104661100	DUP	403100	5	AL591377.1,GRIN3A,PPP3R2,RNF20,TMEM246	RNF20
MCF7	1.32	10:76946401-77092900	DUP	146500	4	COMTD1,RP11-399K21.11,VDAC2,ZNF503-AS1	VDAC2
MCF7	1.32	14:102192301-102679000	DUP	486700	13	CTD-2017C7.1,CTD-2017C7.2,DYNC1H1,HSP90AA1,PPP2R5C,RN7SL472P,RNU6-790P,RP11-1017G21.4,RP11-1017G21.5,RP11-1017G21.6,RP11-1029J19.5,RP11-796G6.2,WDR20	HSP90AA1
MCF7	1.31	2:142873801-143365400	DUP	491600	3	AC016706.1,AC078882.1,LRP1B	LRP1B
MCF7	1.31	3:77343601-78602700	DUP	1259100	8	AC134729.1,RN7SKP61,RN7SL647P,RNU6-217P,ROBO2,RP11-314M24.1,RP11-354H21.1,RP11-354H21.2	ROBO2
MCF7	1.31	3:182372001-182889500	DUP	517500	9	ATP11B,DCUN1D1,LAMP3,MCCC1,MCCC1-AS1,RP11-225N10.1,RP11-531F16.4,RP11-646E18.2,RP11-646E18.4	DCUN1D1
MCF7	1.31	3:188503401-189157900	DUP	654500	4	LPP,TPRG1,TPRG1-AS1,TPRG1-AS2	LPP
MCF7	1.31	8:143592501-144633200	DUP	1040700	41	7SK,AC087793.1,AC145123.2,AP006547.3,ARC,BAI1,C8orf31,CTD-2292P10.2,CTD-2292P10.4,CYP11B2,GLI4,GML,GPIHBP1,JRK,LY6D,LY6E,LY6H,LY6K,LYNX1,LYPD2,MAFA,PSCA,RHPN1,RHPN1-AS1,RNU6-220P,RP11-273G15.2,RP11-520P18.5,RP11-661A12.5,RP11-706C16.5,RP11-706C16.7,RP11-706C16.8,RP11-909N17.2,RP11-909N17.3,RP13-582O9.5,RP13-582O9.7,SLURP1,THEM6,TOP1MT,ZC3H3,ZFP41,ZNF696	BAI1,MAFA
MCF7	1.31	11:77631501-78849200	DUP	1217700	22	ALG8,AP002958.1,CTD-2337I7.1,GAB2,KCTD14,KCTD21,KCTD21-AS1,NARS2,NDUFC2,NDUFC2-KCTD14,RNU6-126P,RNU6-311P,RP11-452H21.1,RP11-452H21.2,RP11-452H21.4,RP11-673F18.1,RP11-7I15.3,RP11-7I15.4,RP11-843A23.1,TENM4,THRSP,USP35	ALG8,GAB2
MCF7	1.31	11:85023401-86017900	DUP	994500	14	AP000974.1,C11orf73,CCDC83,CCDC89,DLG2,EED,PICALM,RNU6-1292P,RNU6-560P,RP11-12D16.2,RP11-90K17.2,SYTL2,TMEM126B,snoU13	EED,PICALM
MCF7	1.31	14:99803101-100985900	DUP	1182800	34	AL132819.1,AL157871.1,AL157871.2,CCDC85C,CCNK,CTD-2376I20.1,DEGS2,EML1,EVL,HHIPL1,MIR151B,MIR342,MIR345,RN7SKP92,RN7SL523P,RNU1-47P,RP11-362L22.1,RP11-436M15.3,RP11-543C4.1,RP11-543C4.3,RP11-638I2.2,RP11-638I2.4,RP11-638I2.6,RP11-638I2.8,RP11-638I2.9,RP11-688G15.3,SETD3,SLC25A29,SLC25A47,U6,WARS,WDR25,YY1,Y_RNA	SETD3
MCF7	1.31	18:8729801-10627300	DUP	1897500	34	ANKRD12,AP005271.1,APCDD1,PPP4R1,RAB31,RALBP1,RN7SL862P,RNA5SP449,RNA5SP450,RNU2-27P,RNU6-903P,RP11-138E9.2,RP11-143J12.2,RP11-143J12.3,RP11-21J18.1,RP11-243E13.1,RP11-243E13.2,RP11-419J16.1,RP11-474N24.6,RP11-61L19.1,RP11-61L19.2,RP11-61L19.3,RP11-674N23.4,RP11-692N5.1,RP11-856M7.6,RP11-881L2.1,RP11-883A18.3,RP11-888D10.3,RP11-888D10.4,SOGA2,TXNDC2,VAPA,Y_RNA,snoU13	ANKRD12
MCF7	1.3	1:45177146-45377891	DUP	200745	16	BEST4,BTBD19,EIF2B3,KIF2C,PLK3,PTCH2,RNU5D-1,RNU5E-6P,RNU5F-1,RP11-269F19.2,RPS8,SNORD38A,SNORD38B,SNORD46,SNORD55,TCTEX1D4	PTCH2
MCF7	1.3	1:155780101-156526700	DUP	746600	38	AL355388.1,ARHGEF2,BGLAP,CCT3,GON4L,IQGAP3,KIAA0907,LAMTOR2,LMNA,MEF2D,MEX3A,MIR9-1,PAQR6,PMF1,PMF1-BGLAP,RAB25,RIT1,RNU4-19P,RP11-139I14.2,RP11-284F21.8,RP11-336K24.12,RP11-336K24.5,RP11-98G7.1,RXFP4,SCARNA4,SEMA4A,SLC25A44,SMG5,SNORA26,SNORA42,SSR2,SYT11,TMEM79,TSACC,UBQLN4,VHLL,Y_RNA,snoU13	RAB25,SMG5
MCF7	1.3	3:78891801-79624200	DUP	732400	3	MIR3923,RN7SL751P,ROBO1	ROBO1
MCF7	1.3	3:79624901-80061800	DUP	436900	2	AC117479.1,ROBO1	ROBO1
MCF7	1.3	3:127870201-128263000	DUP	392800	6	DNAJB8,DNAJB8-AS1,EEFSEC,GATA2,MIR1280,RP11-475N22.4	GATA2
MCF7	1.3	8:141646101-142357600	DUP	711500	12	CTD-3064M3.1,DENND3,MIR151A,PTK2,RNA5SP278,RP11-10J21.3,RP11-10J21.4,RP11-10J21.5,RP11-10J21.6,RP11-128L5.1,RP11-809O17.1,SLC45A4	PTK2
MCF7	1.3	11:45837201-46161000	DUP	323800	10	AC024475.1,C11orf94,CRY2,CTD-2210P24.6,GYLTL1B,MAPK8IP1,PEX16,PHF21A,RP11-618K13.2,RP11-702F3.1	MAPK8IP1
MCF7	1.3	14:23224501-24956400	DUP	1731900	91	ACIN1,ADCY4,AJUBA,AL049829.1,AL132780.1,AL135998.1,AP1G2,BCL2L2,BCL2L2-PABPN1,C14orf119,C14orf164,C14orf93,CBLN3,CDH24,CEBPE,CHMP4A,CIDEB,CMTM5,CPNE6,CTD-2201G16.1,CTD-2555K7.2,DCAF11,DHRS2,DHRS4,DHRS4-AS1,DHRS4L2,EFS,FITM1,GMPR2,HAUS4,HOMEZ,IL25,IRF9,JPH4,KHNYN,LINC00596,LRP10,LRRC16B,LTB4R,LTB4R2,MDP1,MIR208A,MIR208B,MIR4707,MMP14,MYH6,MYH7,NEDD8,NFATC4,NGDN,NOP9,NRL,NYNRIN,OXA1L,PABPN1,PCK2,PP…	AJUBA,BCL2L2,PRMT5,PSMB5
MCF7	1.3	14:93027701-93624500	DUP	596800	8	CHGA,GOLGA5,ITPK1,ITPK1-AS1,LGMN,RIN3,RP11-862G15.1,RP11-862G15.2	GOLGA5
MCF7	1.3	15:73873201-75005500	DUP	1132300	31	AC108137.1,ARID3B,C15orf59,CCDC33,CD276,CLK3,CTD-2311M21.3,CTD-3154N5.1,CYP11A1,EDC3,GOLGA6A,ISLR,ISLR2,LOXL1-AS1,NPTN,PML,RN7SL429P,RP11-10O17.3,RP11-247C2.2,RP11-24D15.1,RP11-60L3.1,RP11-60L3.2,RP11-665J16.1,RP11-8P11.3,SEMA7A,SNORD77,STOML1,STRA6,TBC1D21,UBL7,UBL7-AS1	PML
MCF7	1.3	16:13815701-14084200	DUP	268500	4	CTD-2135D7.2,CTD-2135D7.3,ERCC4,U95743.1	ERCC4
MCF7	1.3	20:29803901-30824200	DUP	1020300	38	AL049539.1,AL160175.1,BCL2L1,CCM2L,COX4I2,DEFB115,DEFB116,DEFB118,DEFB119,DEFB121,DEFB123,DEFB124,DUSP15,FOXS1,HCK,HM13,HM13-AS1,HM13-IT1,ID1,LINC00028,MIR3193,MYLK2,PDRG1,PLAGL2,POFUT1,REM1,RNA5SP480,RNA5SP481,RNA5SP482,RNU1-94P,RNU6-384P,RP1-310O13.7,RP11-243J16.7,SNORA40,TM9SF4,TPX2,TTLL9,XKR7	BCL2L1,ID1
MCF7	1.29	1:157006101-157581200	DUP	575100	9	ARHGEF11,ETV3,ETV3L,FCRL4,FCRL5,RP11-71G12.1,RP11-85G21.1,RP11-85G21.2,RP11-85G21.3	FCRL4
MCF7	1.29	3:112751101-113854000	DUP	1102900	23	AC078785.1,ATP6V1A,BOC,DRD3,GRAMD1C,KIAA1407,KIAA2018,MIR4446,NAA50,QTRTD1,RN7SL767P,RP11-255E6.6,RP11-271C24.2,RP11-572M11.1,RP11-572M11.3,RP11-572M11.4,SIDT1,SIDT1-AS1,SNORD112,SPICE1,WDR52,WDR52-AS1,ZDHHC23	BOC
MCF7	1.29	3:128263901-128672900	DUP	409000	10	ACAD9,C3orf27,KIAA1257,RAB7A,RN7SL698P,RP11-723O4.2,RP11-723O4.6,RP11-723O4.9,RPN1,SNORA24	RPN1
MCF7	1.29	3:134011901-134674300	DUP	662400	11	AC010207.1,AMOTL2,ANAPC13,CEP63,EPHB1,KY,MIR4788,RNA5SP141,RNU6-1174P,RP11-200A1.1,RP11-375I20.6	EPHB1
MCF7	1.29	3:187377201-187920900	DUP	543700	14	AC022498.1,BCL6,LPP,LPP-AS2,RP11-132N15.1,RP11-132N15.2,RP11-132N15.3,RP11-211G3.2,RP11-211G3.3,RP11-30O15.1,RP11-430L16.1,RP11-44H4.1,RTP2,SST	BCL6,LPP
MCF7	1.29	7:26222630-26282413	DUP	59783	3	CBX3,HNRNPA2B1,NFE2L3	NFE2L3
MCF7	1.29	7:150813101-151492700	DUP	679600	18	ABCF2,AGAP3,ASB10,CHPF2,CRYGN,GBX1,MIR3907,MIR671,NUB1,PRKAG2,RHEB,RN7SL76P,RP4-548D19.3,RP4-555L14.4,RP5-1070G24.2,SMARCD3,WDR86,WDR86-AS1	RHEB
MCF7	1.29	7:151571601-152132200	DUP	560600	10	GALNT11,GALNTL5,KMT2C,PRKAG2,PRKAG2-AS1,RNU6-604P,RP11-796I2.1,RP5-981O7.2,Y_RNA,snoU13	KMT2C
MCF7	1.29	8:134226601-134325200	DUP	98600	2	NDRG1,WISP1-OT1	NDRG1
MCF7	1.29	9:106570101-107255100	DUP	685000	2	RP11-82L2.1,SMC2	SMC2
MCF7	1.29	11:46184301-47579900	DUP	1395600	46	AC090559.1,AC090559.2,ACP2,AMBRA1,ARFGAP2,ARHGAP1,ATG13,C11orf49,CELF1,CHRM4,CKAP5,CREB3L1,CTD-2589M5.4,CTD-2589M5.5,DDB2,DGKZ,F2,HARBI1,LRP4,LRP4-AS1,MADD,MDK,MIR3160-1,MIR4487,MIR4688,MIR5582,MYBPC3,NR1H3,PACSIN3,PSMC3,RAPSN,RN7SL652P,RN7SL772P,RNU6-1302P,RP11-17G12.2,RP11-17G12.3,RP11-390K5.3,RP11-390K5.6,RP11-702F3.3,RP11-702F3.4,RP11-750H9.5,RP11-750H9.7,SLC39A13,SNORD67,SPI1,ZNF408	CREB3L1,DDB2
[truncated: 202 more rows]

## Sheet: 5F
Table S5F: List of copy number alterations identified in the cell line models
SAMPLE	RatioToAverageCoverage	LOCATION	SVTYPE	SVLEN	NumofGenes	GENES	CandidateGene
[truncated: 34 more rows]
